# Supplementary material for: Conserved microRNA targeting reveals preexisting gene dosage sensitivities that shaped amniote sex chromosome evolution
Source: Genome Res. 2018 Apr;28(4):474–83. doi: 10.1101/gr.230433.117 (PMC5880238; doi:10.1101/gr.230433.117)
Supplement: Supplemental Material [file supp_gr.230433.117_Supplemental_Table_S1.xlsx]

## Sheet: Sheet1
Legend: Information on statistical tests, alternative hypotheses, test statistics, and p-values used
Figure	Comparison	Test	Alternative hypothesis	Test statistic	p-value
Figure 1A	Duplicated vs not duplicated	Kolmogorov-Smirnov	two-sided	0.059301	< 2.2e-16
Figure 1B	Duplicated vs not duplicated	Kolmogorov-Smirnov	two-sided	0.058951	< 2.2e-16
Figure 1C	Not deleted, not duplicated vs not deleted, duplicated	Wilcoxon rank-sum	two-sided	5091300	< 2.2e-16
Figure 1C	Not deleted, duplicated vs deleted, not duplicated	Wilcoxon rank-sum	two-sided	4769900	0.008586
Figure 1C	Deleted, not duplicated vs deleted, duplicated	Wilcoxon rank-sum	two-sided	8195100	< 2.2e-16
Supplemental Figure S1A	Deleted vs not deleted	Kolmogorov-Smirnov	two-sided	0.043822	< 2.2e-16
Supplemental Figure S1B	Deleted vs not deleted	Kolmogorov-Smirnov	two-sided	0.042755	< 2.2e-16
Supplemental Figure S1D	Duplicated vs not deleted	Wilcoxon rank-sum	two-sided	10243000	< 2.2e-16
Supplemental Figure S1D	Deleted vs not deleted	Wilcoxon rank-sum	two-sided	0.042755	1.149e-12
Figure 2A	X-Y pairs vs Inactivated	Kolmogorov-Smirnov	two-sided	0.1074	0.0005996
Figure 2A	Inactivated vs Escape	Kolmogorov-Smirnov	two-sided	0.086759	5.035e-07
Figure 2A	X-Y pairs vs Escape	Kolmogorov-Smirnov	two-sided	0.17787	3.415e-08
Figure 2B	X-Y pairs vs Inactivated	Wilcoxon rank-sum	two-sided	4072800	0.02168
Figure 2B	Inactivated vs Escape	Wilcoxon rank-sum	two-sided	8598	0.02168
Figure 2B	X-Y pairs vs Escape	Wilcoxon rank-sum	two-sided	8598	0.02168
Supplemental Figure S2A	8 mammal X-Y pairs vs Ancestral X	Kolmogorov-Smirnov	two-sided	0.094818	3.922e-05
Supplemental Figure S2B	8 mammal X-Y pairs vs Ancestral X	Wilcoxon rank-sum	two-sided	8598	0.02168
Supplemental Figure S3A	X-Y pairs vs Inactivated	custom, difference in mean Pct	one-sided	0.0690683	0.018
Supplemental Figure S3B	Inactivated vs Escape	custom, difference in mean Pct	one-sided	0.040245	0.01
Supplemental Figure S3C	X-Y pairs vs Escape	custom, difference in mean Pct	one-sided	0.11072	0.001
Supplemental Figure S3D	8 mammal X-Y pairs vs Ancestral X	custom, difference in mean Pct	one-sided	0.0545723	0.008
Supplemental Figure S4A	X-Y pairs vs Inactivated	Kolmogorov-Smirnov	two-sided	0.1074	0.0005996
Supplemental Figure S4A	X-Y pairs vs Consistent Escape	Kolmogorov-Smirnov	two-sided	0.17942	6.083e-07
Supplemental Figure S4A	X-Y pairs vs Variable Escape	Kolmogorov-Smirnov	two-sided	0.18319	6.259e-07
Supplemental Figure S4A	Inactivated vs Consistent Escape	Kolmogorov-Smirnov	two-sided	0.086327	0.000387
Supplemental Figure S4A	Inactivated vs Variable Escape	Kolmogorov-Smirnov	two-sided	0.093423	0.0002406
Supplemental Figure S4A	Consistent Escape vs Variable Escape	Kolmogorov-Smirnov	two-sided	0.028577	0.9691
Supplemental Figure S4B	X-Y pairs vs Inactivated	custom, difference in mean Pct	one-sided	0.0690683	0.018
Supplemental Figure S4B	X-Y pairs vs Consistent Escape	custom, difference in mean Pct	one-sided	0.111241	0.003
Supplemental Figure S4B	X-Y pairs vs Variable Escape	custom, difference in mean Pct	one-sided	0.11042	0.01
Supplemental Figure S4B	Inactivated vs Consistent Escape	custom, difference in mean Pct	one-sided	0.0429158	0.041
Supplemental Figure S4B	Inactivated vs Variable Escape	custom, difference in mean Pct	one-sided	0.0413469	0.041
Supplemental Figure S4B	Consistent Escape vs Variable Escape	custom, difference in mean Pct	one-sided	-0.00181563	0.528
Supplemental Figure S5A	X-Y pairs vs Inactivated+Discordant	Kolmogorov-Smirnov	two-sided	0.10817	0.0005121
Supplemental Figure S5A	Inactivated+Discordant vs Escape	Kolmogorov-Smirnov	two-sided	0.085914	5.434e-07
Supplemental Figure S5A	X-Y pairs vs Escape	Kolmogorov-Smirnov	two-sided	0.17787	3.415e-08
Supplemental Figure S5B	X-Y pairs vs Inactivated+Discordant	Wilcoxon rank-sum	two-sided	3737.5	0.03055
Supplemental Figure S5B	Inactivated+Discordant vs Escape	Wilcoxon rank-sum	two-sided	11100	0.05623
Supplemental Figure S5B	X-Y pairs vs Escape	Wilcoxon rank-sum	two-sided	8598	0.02168
Supplemental Figure S5C	X-Y pairs vs Inactivated	Kolmogorov-Smirnov	two-sided	0.1074	0.0005996
Supplemental Figure S5C	Inactivated vs Escape+Discordant	Kolmogorov-Smirnov	two-sided	0.057283	0.0001155
Supplemental Figure S5C	X-Y pairs vs Escape+Discordant	Kolmogorov-Smirnov	two-sided	0.15588	5.561e-07
Supplemental Figure S5D	X-Y pairs vs Inactivated	Wilcoxon rank-sum	two-sided	4072800	0.02168
Supplemental Figure S5D	Inactivated vs Escape+Discordant	Wilcoxon rank-sum	two-sided	16472	0.02866
Supplemental Figure S5D	X-Y pairs vs Escape+Discordant	Wilcoxon rank-sum	two-sided	1020.5	0.008107
Supplemental Figure S6B	X-Y pairs vs Inactivated	Wilcoxon rank-sum	two-sided	4072800	0.02136
Supplemental Figure S6B	Inactivated vs Escape	Wilcoxon rank-sum	two-sided	13629000	0.3466
Supplemental Figure S6B	X-Y pairs vs Escape	Wilcoxon rank-sum	two-sided	697310	0.01626
Supplemental Figure S6C	X-Y pairs vs Inactivated	Kolmogorov-Smirnov	two-sided	0.11528	0.0005297
Supplemental Figure S6C	Inactivated vs Escape	Kolmogorov-Smirnov	two-sided	0.076384	4.92e-05
Supplemental Figure S6C	X-Y pairs vs Escape	Kolmogorov-Smirnov	two-sided	0.17835	2.549e-07
Supplemental Figure S7A	X-Y pairs vs Escape	Wilcoxon rank-sum	two-sided	679.5	0.0001158
Supplemental Figure S7A	X-Y pairs vs Inactivated	Wilcoxon rank-sum	two-sided	3748.5	0.000434
Supplemental Figure S7A	Inactivated vs Escape	Wilcoxon rank-sum	two-sided	10044	0.05039
Supplemental Figure S7B	8 mammal X-Y pairs vs Ancestral X	Wilcoxon rank-sum	two-sided	9256	0.001413
Supplemental Figure S9A	4 species Z-W pairs vs Ancestral Z	Kolmogorov-Smirnov	two-sided	0.17905	< 2.2e-16
Supplemental Figure S9B	4 species Z-W pairs vs Ancestral Z	Wilcoxon rank-sum	two-sided	31525	4.891e-10
Supplemental Figure S9C	14 species Z-W pairs vs Ancestral Z	Kolmogorov-Smirnov	two-sided	0.13629	< 2.2e-16
Supplemental Figure S9D	14 species Z-W pairs vs Ancestral Z	Wilcoxon rank-sum	two-sided	51503	1.144e-11
Supplemental Figure S10A	Chicken Z-W pairs vs Ancestral Z	custom, difference in mean Pct	one-sided	0.10607	< 0.001
Supplemental Figure S10B	4 species Z-W pairs vs Ancestral Z	custom, difference in mean Pct	one-sided	0.105732	< 0.001
Supplemental Figure S10C	14 species Z-W pairs vs Ancestral Z	custom, difference in mean Pct	one-sided	0.0783162	< 0.001
Supplemental Figure S11A	Chicken Z-W pairs vs Ancestral Z	Wilcoxon rank-sum	two-sided	21845000	0.008296
Supplemental Figure S11B	Chicken Z-W pairs vs Ancestral Z	Kolmogorov-Smirnov	two-sided	0.15453	1.194e-06
Supplemental Figure S13A	4 species Z-W pairs vs Ancestral Z	Fisher's exact	two-sided	4.42439	2.978e-09
Supplemental Figure S13B	4 species Z-W pairs vs Ancestral Z	Fisher's exact	two-sided	3.36751	1.853e-06
Supplemental Figure S14A	14 species Z-W pairs vs Ancestral Z	Fisher's exact	two-sided	3.48902	7.386e-11
Supplemental Figure S14B	14 species Z-W pairs vs Ancestral Z	Fisher's exact	two-sided	2.32537	1.818e-05
Supplemental Figure S15A	Ancestral Z with excess human-chicken-conserved sites vs not	Wilcoxon rank-sum	two-sided	5160	0.004766
Supplemental Figure S15B	Ancestral Z with excess human-chicken-conserved sites vs not	Wilcoxon rank-sum	two-sided	12186	9.319e-07
Supplemental Figure S15C	Ancestral Z with excess human-chicken-conserved sites vs not	Wilcoxon rank-sum	two-sided	13241	0.5686
Supplemental Figure S15D	Ancestral Z with excess human-chicken-conserved sites vs not	Wilcoxon rank-sum	two-sided	14703	0.4491
Supplemental Figure S16A	Ancestral X/Z targets vs non-targets, miR-212	Kolmogorov-Smirnov	two-sided	0.0397087	0.91637
Supplemental Figure S16B	Ancestral X/Z targets vs non-targets, miR-124	Kolmogorov-Smirnov	two-sided	0.132026	0.000228032
Supplemental Figure S16C	Ancestral X/Z targets vs non-targets, miR-181	Kolmogorov-Smirnov	two-sided	0.144937	1.24243e-05
Supplemental Figure S16D	Ancestral X/Z targets vs non-targets, miR-128	Kolmogorov-Smirnov	two-sided	0.197103	1.59524e-09
Supplemental Figure S16E	Ancestral X/Z targets vs non-targets, miR-148	Kolmogorov-Smirnov	two-sided	0.17016	1.36639e-05
Supplemental Figure S16F	Ancestral X/Z targets vs non-targets, miR-9	Kolmogorov-Smirnov	two-sided	0.101499	0.0142383
Supplemental Figure S16G	Ancestral X/Z targets vs non-targets, miR-7	Kolmogorov-Smirnov	two-sided	0.149773	2.54842e-05
Supplemental Figure S16H	Ancestral X/Z targets vs non-targets, miR-1	Kolmogorov-Smirnov	two-sided	0.156484	6.77393e-05
Supplemental Figure S16I	Ancestral X/Z targets vs non-targets, miR-122	Kolmogorov-Smirnov	two-sided	0.0921361	0.0650757
Supplemental Figure S16J	Ancestral X/Z targets vs non-targets, miR-34	Kolmogorov-Smirnov	two-sided	0.169987	0.000183202
Supplemental Figure S16K	Ancestral X/Z targets vs non-targets, miR-142	Kolmogorov-Smirnov	two-sided	0.168184	7.54841e-07
Supplemental Figure S16L	Ancestral X/Z targets vs non-targets, miR-23	Kolmogorov-Smirnov	two-sided	0.134102	3.81309e-05
Supplemental Figure S17A	Ancestral X/Z targets vs non-targets, miR-103	Kolmogorov-Smirnov	two-sided	0.20233	7.757e-05
Supplemental Figure S17B	Ancestral X/Z targets vs non-targets, miR-7	Kolmogorov-Smirnov	two-sided	0.34089	< 2.2e-16
Supplemental Figure S17C	Ancestral X/Z targets vs non-targets, miR-92a	Kolmogorov-Smirnov	two-sided	0.11751	0.001145
Supplemental Figure S17D	Ancestral X/Z targets vs non-targets, miR-124	Kolmogorov-Smirnov	two-sided	0.18968	7.738e-09
Supplemental Figure S18A	Ancestral X/Z targets vs non-targets, miR-155	Kolmogorov-Smirnov	two-sided	0.44212	5.771e-07
Supplemental Figure S18B	Ancestral X/Z targets vs non-targets, miR-155	Kolmogorov-Smirnov	two-sided	0.12609	0.6573
Supplemental Figure S18C	Ancestral X/Z targets vs non-targets, miR-155	Kolmogorov-Smirnov	two-sided	0.32043	0.01226
Supplemental Figure S18D	Ancestral X/Z targets vs non-targets, miR-155	Kolmogorov-Smirnov	two-sided	0.17307	0.4473
Supplemental Figure S19A	Ancestral X/Z targets vs non-targets, miR-124	Fisher's exact	two-sided	1.32389	0.04289
Supplemental Figure S19B	Ancestral X/Z targets vs non-targets, miR-7	Fisher's exact	two-sided	1.29525	0.2538
