# Supplementary material for: Conserved microRNA targeting reveals preexisting gene dosage sensitivities that shaped amniote sex chromosome evolution
Source: Genome Res. 2018 Apr;28(4):474–83. doi: 10.1101/gr.230433.117 (PMC5880238; doi:10.1101/gr.230433.117)
Supplement: Supplemental Material [file supp_gr.230433.117_Supplemental_Table_S2.xlsx]

## Sheet: supptable2.txt
Legend: Copy number status in control individuals for autosomal genes from the Exome Aggregation Consortium. "Dup" means the gene is found to be duplicated, "Del" means deleted.
Gene	ExAC copy number status
A1BG	Dup_NotDel
A1CF	NA
A2M	NotDup_NotDel
A2ML1	Dup_Del
A3GALT2	NotDup_Del
A4GALT	Dup_NotDel
A4GNT	Dup_NotDel
AAAS	Dup_Del
AACS	NotDup_Del
AADAC	NA
AADACL2	NA
AADACL3	Dup_Del
AADACL4	Dup_NotDel
AADAT	NotDup_Del
AAED1	NA
AAGAB	NotDup_NotDel
AAK1	Dup_NotDel
AAMDC	NA
AAMP	Dup_Del
AANAT	Dup_NotDel
AAR2	Dup_Del
AARD	NotDup_NotDel
AARS	NA
AARS2	Dup_Del
AARSD1	Dup_Del
AASDH	Dup_Del
AASDHPPT	Dup_NotDel
AASS	NotDup_Del
AATF	NA
AATK	NA
ABAT	Dup_Del
ABCA1	Dup_Del
ABCA10	NotDup_Del
ABCA12	NotDup_Del
ABCA13	Dup_Del
ABCA2	NotDup_NotDel
ABCA3	NotDup_Del
ABCA4	NotDup_Del
ABCA5	Dup_Del
ABCA6	NotDup_Del
ABCA7	NotDup_Del
ABCA8	NotDup_Del
ABCA9	NotDup_Del
ABCB1	NA
ABCB10	Dup_Del
ABCB11	Dup_Del
ABCB4	NA
ABCB5	NotDup_Del
ABCB6	Dup_Del
ABCB7	NA
ABCB8	NotDup_Del
ABCB9	NotDup_NotDel
ABCC1	NA
ABCC10	NotDup_Del
ABCC11	Dup_Del
ABCC12	Dup_Del
ABCC2	NA
ABCC3	NotDup_Del
ABCC4	NotDup_Del
ABCC5	Dup_NotDel
ABCC6	NA
ABCC8	NotDup_Del
ABCC9	NotDup_Del
ABCD1	NA
ABCD2	Dup_NotDel
ABCD3	NotDup_Del
ABCD4	NotDup_Del
ABCE1	NotDup_NotDel
ABCF1	NotDup_Del
ABCF2	Dup_Del
ABCF3	NA
ABCG1	Dup_Del
ABCG2	NotDup_Del
ABCG4	Dup_Del
ABCG5	Dup_Del
ABCG8	Dup_Del
ABHD1	Dup_Del
ABHD10	NotDup_Del
ABHD11	NA
ABHD12	Dup_Del
ABHD12B	Dup_Del
ABHD13	Dup_NotDel
ABHD14A	Dup_Del
ABHD14B	NotDup_Del
ABHD15	Dup_Del
ABHD16A	NotDup_Del
ABHD16B	NA
ABHD17A	NotDup_NotDel
ABHD17B	Dup_Del
ABHD17C	NotDup_NotDel
ABHD2	NotDup_NotDel
ABHD3	NotDup_NotDel
ABHD4	Dup_Del
ABHD5	NotDup_Del
ABHD6	NotDup_NotDel
ABHD8	Dup_Del
ABI1	NA
ABI2	NotDup_NotDel
ABI3	Dup_NotDel
ABI3BP	NotDup_Del
ABL1	Dup_NotDel
ABL2	NotDup_Del
ABLIM1	NotDup_NotDel
ABLIM2	NotDup_Del
ABLIM3	NotDup_Del
ABO	NA
ABR	NA
ABRA	Dup_NotDel
ABRACL	NotDup_NotDel
ABT1	Dup_Del
ABTB1	NotDup_Del
ABTB2	Dup_Del
AC000003.2	NA
AC002321.2	NA
AC002365.1	NA
AC002451.1	NA
AC002472.13	NA
AC003070.1	NA
AC003102.1	NA
AC004381.6	NotDup_Del
AC004466.1	NotDup_NotDel
AC004899.1	NA
AC005003.1	NA
AC005358.1	Dup_NotDel
AC005477.1	NA
AC005606.1	NA
AC005609.1	NA
AC005841.1	NA
AC006372.1	NA
AC006435.1	Dup_NotDel
AC006449.1	NA
AC006455.1	NA
AC006486.1	NA
AC006547.14	NA
AC006967.1	NA
AC007375.1	NA
AC007461.1	NA
AC007952.5	NA
AC007952.6	NA
AC007956.1	NA
AC008267.1	NA
AC008394.1	NA
AC008443.1	NA
AC008964.1	NA
AC010327.2	NotDup_NotDel
AC010336.1	Dup_NotDel
AC010441.1	NA
AC010536.1	NA
AC011043.1	NA
AC011298.1	NA
AC011484.1	NotDup_NotDel
AC011500.1	NA
AC011841.1	NA
AC011897.1	NA
AC012215.1	NA
AC012313.1	NA
AC012360.2	NA
AC015660.1	NA
AC016251.1	NA
AC016559.1	NA
AC016586.1	NA
AC016745.1	NA
AC016757.3	NA
AC018445.1	NA
AC018470.1	NA
AC018755.1	NA
AC019171.1	NA
AC020907.1	NA
AC020952.1	NA
AC021860.1	NA
AC022400.2	NA
AC022498.1	NA
AC023632.1	NA
AC024257.1	NA
AC024940.1	NA
AC025262.1	NA
AC025278.1	NA
AC026202.1	NA
AC026740.1	NA
AC027228.1	NA
AC027307.3	NA
AC027309.1	NA
AC040160.1	NA
AC068987.1	NA
AC069547.1	NA
AC073342.1	NA
AC079210.1	NotDup_NotDel
AC079341.1	NA
AC079354.1	NA
AC079602.1	NA
AC090186.1	NA
AC090574.1	NA
AC091150.1	NA
AC092291.2	NA
AC092850.1	NA
AC093157.1	NotDup_Del
AC093323.1	NA
AC093677.1	NA
AC096677.1	NA
AC103809.2	Dup_Del
AC104472.1	NA
AC104809.3	NA
AC105020.1	NA
AC106017.1	NA
AC110615.1	Dup_Del
AC110771.1	NA
AC110781.3	NA
AC110792.1	NA
AC112693.2	NA
AC114546.1	NA
AC115618.1	NA
AC116407.2	NA
AC117395.1	NA
AC127032.4	NA
AC127496.1	NA
AC131971.1	NA
AC132186.1	NA
AC132192.1	NA
AC132216.1	NA
AC132872.2	NA
AC135048.1	NotDup_NotDel
AC135178.1	NA
AC136297.1	NA
AC136604.1	NA
AC137056.1	NA
AC137932.1	NA
AC138655.1	NA
AC139426.2	NA
AC140061.12	NA
AC145212.1	NA
AC187652.1	NA
AC217772.1	NA
AC217778.1	NA
AC217779.2	NA
AC225613.4	NA
ACAA1	Dup_NotDel
ACAA2	Dup_NotDel
ACACA	NA
ACACB	NotDup_NotDel
ACAD10	NotDup_Del
ACAD11	NotDup_Del
ACAD8	Dup_Del
ACAD9	NA
ACADL	Dup_Del
ACADM	Dup_Del
ACADS	Dup_Del
ACADSB	Dup_Del
ACADVL	Dup_Del
ACAN	NotDup_NotDel
ACAP1	NotDup_Del
ACAP2	Dup_Del
ACAP3	Dup_Del
ACAT1	Dup_Del
ACAT2	Dup_NotDel
ACBD3	NotDup_Del
ACBD4	NA
ACBD5	NA
ACBD6	NotDup_Del
ACBD7	Dup_NotDel
ACCS	Dup_Del
ACCSL	Dup_Del
ACD	NotDup_Del
ACE	Dup_Del
ACE	Dup_Del
ACE2	NA
ACER1	NotDup_Del
ACER2	Dup_Del
ACER3	Dup_Del
ACHE	Dup_Del
ACIN1	Dup_NotDel
ACKR2	Dup_NotDel
ACKR3	Dup_NotDel
ACKR4	NotDup_Del
ACLY	NotDup_NotDel
ACMSD	NotDup_NotDel
ACN9	NotDup_NotDel
ACO1	NotDup_Del
ACO2	NotDup_NotDel
ACOT1	NA
ACOT11	NA
ACOT12	Dup_Del
ACOT13	Dup_NotDel
ACOT2	NA
ACOT4	NA
ACOT6	NotDup_Del
ACOT7	NotDup_Del
ACOT8	Dup_Del
ACOT9	NA
ACOX1	Dup_Del
ACOX2	NotDup_Del
ACOX3	Dup_Del
ACOXL	NA
ACP1	Dup_Del
ACP2	NotDup_Del
ACP5	NotDup_Del
ACP6	NA
ACPL2	NotDup_Del
ACPP	NotDup_Del
ACPT	Dup_Del
ACR	Dup_Del
ACRBP	Dup_Del
ACRC	NA
ACRV1	Dup_Del
ACSBG1	NotDup_NotDel
ACSBG2	NotDup_Del
ACSF2	NotDup_NotDel
ACSF3	NA
ACSL1	Dup_Del
ACSL3	NotDup_Del
ACSL4	NA
ACSL5	NotDup_Del
ACSL6	Dup_Del
ACSM1	NA
ACSM2A	NA
ACSM2B	NA
ACSM3	NA
ACSM5	NA
ACSS1	Dup_NotDel
ACSS2	Dup_Del
ACSS3	Dup_Del
ACTA1	NotDup_NotDel
ACTA2	Dup_NotDel
ACTB	NA
ACTBL2	Dup_NotDel
ACTC1	Dup_NotDel
ACTG1	NotDup_NotDel
ACTG2	Dup_NotDel
ACTL6A	Dup_NotDel
ACTL6B	NotDup_Del
ACTL7A	NotDup_NotDel
ACTL7B	NotDup_NotDel
ACTL8	NotDup_NotDel
ACTL9	Dup_NotDel
ACTN1	NotDup_Del
ACTN2	Dup_Del
ACTN4	NotDup_NotDel
ACTR10	Dup_Del
ACTR1A	NotDup_Del
ACTR1B	NotDup_NotDel
ACTR2	Dup_Del
ACTR3	NotDup_NotDel
ACTR3B	NA
ACTR3C	NA
ACTR5	NotDup_Del
ACTR6	Dup_Del
ACTR8	Dup_Del
ACTRT1	NA
ACTRT2	Dup_NotDel
ACTRT3	Dup_NotDel
ACVR1	NotDup_Del
ACVR1B	NotDup_NotDel
ACVR1C	NotDup_Del
ACVR2A	NotDup_Del
ACVR2B	NotDup_NotDel
ACVRL1	NotDup_NotDel
ACY1	NotDup_Del
ACY3	Dup_NotDel
ACYP1	NotDup_Del
ACYP2	NA
ADA	NotDup_Del
ADAD1	Dup_Del
ADAD2	Dup_Del
ADAL	Dup_NotDel
ADAM10	NotDup_Del
ADAM11	NotDup_NotDel
ADAM12	NotDup_Del
ADAM15	NotDup_Del
ADAM17	Dup_NotDel
ADAM18	Dup_Del
ADAM19	NotDup_Del
ADAM2	Dup_Del
ADAM20	Dup_NotDel
ADAM21	Dup_NotDel
ADAM22	Dup_Del
ADAM23	NotDup_Del
ADAM28	NotDup_Del
ADAM29	Dup_NotDel
ADAM30	Dup_Del
ADAM32	Dup_Del
ADAM33	Dup_Del
ADAM7	Dup_Del
ADAM8	NA
ADAM9	Dup_Del
ADAMDEC1	Dup_Del
ADAMTS1	Dup_Del
ADAMTS10	Dup_Del
ADAMTS12	Dup_Del
ADAMTS13	NotDup_Del
ADAMTS14	NotDup_NotDel
ADAMTS15	Dup_NotDel
ADAMTS16	NotDup_NotDel
ADAMTS17	NA
ADAMTS18	NotDup_Del
ADAMTS19	NotDup_NotDel
ADAMTS2	NA
ADAMTS20	NotDup_Del
ADAMTS3	NA
ADAMTS4	Dup_NotDel
ADAMTS5	Dup_Del
ADAMTS6	NotDup_NotDel
ADAMTS7	NotDup_Del
ADAMTS8	Dup_Del
ADAMTS9	NotDup_Del
ADAMTSL1	NotDup_Del
ADAMTSL2	NA
ADAMTSL3	NA
ADAMTSL4	Dup_Del
ADAMTSL4-AS1	NA
ADAMTSL5	NotDup_Del
ADAP1	Dup_Del
ADAP2	NA
ADAR	NotDup_NotDel
ADARB1	Dup_Del
ADARB2	NotDup_Del
ADAT1	Dup_Del
ADAT2	NotDup_NotDel
ADAT3	NA
ADC	NotDup_Del
ADCK1	NotDup_Del
ADCK2	NotDup_Del
ADCK3	NotDup_Del
ADCK4	Dup_Del
ADCK5	NA
ADCY1	Dup_Del
ADCY10	Dup_Del
ADCY2	NotDup_Del
ADCY3	Dup_Del
ADCY4	NotDup_NotDel
ADCY5	Dup_NotDel
ADCY6	NotDup_NotDel
ADCY7	Dup_NotDel
ADCY8	NotDup_NotDel
ADCY9	NotDup_Del
ADCYAP1	NotDup_Del
ADCYAP1R1	NotDup_Del
ADD1	Dup_Del
ADD2	Dup_NotDel
ADD3	NotDup_NotDel
ADGB	NA
ADH1A	Dup_Del
ADH1B	NA
ADH4	Dup_Del
ADH5	Dup_Del
ADH6	Dup_Del
ADH7	Dup_Del
ADHFE1	NotDup_Del
ADI1	Dup_Del
ADIG	NA
ADIPOQ	Dup_NotDel
ADIPOR1	Dup_Del
ADIPOR2	Dup_Del
ADIRF	Dup_NotDel
ADK	NotDup_NotDel
ADM	NotDup_Del
ADM2	NA
ADM5	NA
ADNP	NotDup_Del
ADNP2	Dup_Del
ADO	NA
ADORA1	NotDup_NotDel
ADORA2A	NA
ADORA2B	NA
ADORA3	NotDup_Del
ADPGK	NotDup_Del
ADPRH	NotDup_NotDel
ADPRHL1	NA
ADPRHL2	NotDup_NotDel
ADPRM	Dup_Del
ADRA1A	NA
ADRA1B	NotDup_NotDel
ADRA1D	NA
ADRA2A	NotDup_NotDel
ADRA2B	Dup_Del
ADRA2C	NA
ADRB1	NotDup_NotDel
ADRB2	NotDup_NotDel
ADRB3	NA
ADRBK1	NotDup_Del
ADRBK2	NA
ADRM1	Dup_Del
ADSL	Dup_Del
ADSS	Dup_NotDel
ADSSL1	Dup_NotDel
ADTRP	Dup_Del
AEBP1	Dup_NotDel
AEBP2	NA
AEN	NotDup_NotDel
AES	NotDup_NotDel
AFAP1	NotDup_Del
AFAP1L1	NotDup_NotDel
AFAP1L2	NotDup_Del
AFF1	Dup_Del
AFF2	NA
AFF3	NotDup_NotDel
AFF4	NotDup_Del
AFG3L2	Dup_Del
AFM	NotDup_Del
AFMID	NotDup_Del
AFP	NotDup_Del
AFTPH	Dup_NotDel
AGA	Dup_Del
AGAP1	NotDup_Del
AGAP10	NA
AGAP2	Dup_NotDel
AGAP3	NotDup_Del
AGAP4	NA
AGAP5	Dup_NotDel
AGAP6	NA
AGAP7	NA
AGAP8	NA
AGAP9	NA
AGBL1	NA
AGBL2	Dup_Del
AGBL3	NA
AGBL4	NA
AGBL5	Dup_Del
AGER	NA
AGFG1	Dup_Del
AGFG2	NA
AGGF1	Dup_Del
AGK	NotDup_Del
AGL	Dup_Del
AGMAT	Dup_Del
AGMO	NotDup_Del
AGO1	NotDup_NotDel
AGO2	NotDup_Del
AGO3	NotDup_Del
AGO4	NotDup_Del
AGPAT1	NA
AGPAT2	Dup_NotDel
AGPAT3	NA
AGPAT4	NA
AGPAT5	Dup_Del
AGPAT6	Dup_NotDel
AGPAT9	NotDup_Del
AGPS	NotDup_Del
AGR2	Dup_Del
AGR3	Dup_Del
AGRN	Dup_Del
AGRP	NotDup_NotDel
AGT	Dup_Del
AGTPBP1	NA
AGTR1	NA
AGTR2	NA
AGTRAP	NotDup_Del
AGXT	NotDup_Del
AGXT2	NA
AHCTF1	Dup_Del
AHCY	Dup_Del
AHCYL1	NotDup_Del
AHCYL2	NotDup_Del
AHDC1	NotDup_NotDel
AHI1	NotDup_Del
AHNAK	NotDup_NotDel
AHNAK2	NA
AHR	Dup_Del
AHRR	NA
AHSA1	NotDup_NotDel
AHSA2	Dup_Del
AHSG	Dup_NotDel
AHSP	Dup_NotDel
AICDA	NotDup_Del
AIDA	NA
AIF1	NotDup_Del
AIF1L	NA
AIFM1	NA
AIFM2	NotDup_NotDel
AIFM3	NA
AIG1	NotDup_Del
AIM1	NotDup_Del
AIM1L	NotDup_Del
AIM2	Dup_NotDel
AIMP1	NotDup_Del
AIMP2	NA
AIP	NotDup_NotDel
AIPL1	NotDup_NotDel
AIRE	NA
AJAP1	NotDup_NotDel
AJUBA	Dup_NotDel
AK1	Dup_NotDel
AK2	NotDup_NotDel
AK3	Dup_Del
AK4	NotDup_NotDel
AK5	NotDup_NotDel
AK7	Dup_Del
AK8	Dup_Del
AK9	NotDup_Del
AKAP1	NotDup_NotDel
AKAP10	NA
AKAP11	NotDup_Del
AKAP12	Dup_NotDel
AKAP13	NA
AKAP14	NA
AKAP17A	NA
AKAP2	NotDup_Del
AKAP3	Dup_Del
AKAP4	NA
AKAP5	NotDup_NotDel
AKAP6	NotDup_Del
AKAP7	Dup_NotDel
AKAP8	NotDup_NotDel
AKAP8L	NotDup_NotDel
AKAP9	Dup_Del
AKIP1	NotDup_NotDel
AKIRIN1	NotDup_NotDel
AKIRIN2	NotDup_Del
AKNA	NA
AKNAD1	NA
AKR1A1	Dup_Del
AKR1B1	NotDup_Del
AKR1B10	NotDup_Del
AKR1B15	NA
AKR1C1	NA
AKR1C2	Dup_Del
AKR1C3	Dup_Del
AKR1C4	Dup_Del
AKR1CL1	Dup_Del
AKR1D1	NotDup_Del
AKR1E2	NotDup_NotDel
AKR7A2	Dup_Del
AKR7A3	NA
AKR7L	NA
AKT1	Dup_NotDel
AKT1S1	Dup_NotDel
AKT2	Dup_NotDel
AKT3	Dup_Del
AKTIP	NotDup_NotDel
AL009178.1	NA
AL022328.1	Dup_Del
AL031663.2	NA
AL031666.2	NA
AL033381.1	NA
AL049840.1	NA
AL050303.1	NA
AL078585.1	NA
AL079342.1	NA
AL109659.1	NA
AL109927.1	NA
AL117190.3	NA
AL118506.1	NA
AL121761.2	NA
AL133318.1	NA
AL133481.1	NA
AL136115.1	NA
AL136218.1	NA
AL136531.1	NA
AL138815.2	NA
AL138847.1	NA
AL139099.1	NA
AL139147.1	NA
AL158091.1	NA
AL158147.2	NA
AL161784.1	NotDup_Del
AL162407.1	NA
AL162851.1	NA
AL353608.1	NA
AL353698.1	NA
AL354718.1	NA
AL354822.1	NA
AL355390.1	NA
AL355490.1	NA
AL355531.2	NA
AL356356.1	NA
AL356585.1	NA
AL357673.1	NA
AL358113.1	NA
AL359091.2	NA
AL359195.1	NA
AL359736.1	NA
AL359878.1	NA
AL360004.1	NA
AL391421.1	NA
AL445989.1	NA
AL450307.1	NA
AL589765.1	NA
AL590452.1	NA
AL590483.1	NA
AL590523.1	NA
AL590560.1	NA
AL590708.2	NA
AL590714.1	NA
AL590822.2	NA
AL590867.1	NA
AL591479.1	NA
AL592183.1	NA
AL626787.1	NA
AL627309.1	NA
AL645728.1	NA
AL671561.1	NA
AL807752.1	NA
AL845454.1	NA
AL953854.2	NA
ALAD	Dup_Del
ALAS1	NotDup_NotDel
ALAS2	NA
ALB	NotDup_Del
ALCAM	NotDup_Del
ALDH16A1	NA
ALDH18A1	NotDup_Del
ALDH1A1	Dup_Del
ALDH1A2	NotDup_Del
ALDH1A3	NA
ALDH1B1	NotDup_Del
ALDH1L1	NA
ALDH1L2	NotDup_Del
ALDH2	Dup_Del
ALDH3A1	NA
ALDH3A2	NA
ALDH3B1	NA
ALDH3B2	NA
ALDH4A1	NotDup_Del
ALDH5A1	Dup_Del
ALDH6A1	Dup_Del
ALDH7A1	Dup_Del
ALDH8A1	NotDup_Del
ALDH9A1	NotDup_Del
ALDOA	NA
ALDOB	Dup_Del
ALDOC	NA
ALG1	Dup_Del
ALG10	NA
ALG10B	NA
ALG11	Dup_Del
ALG12	Dup_Del
ALG13	NA
ALG14	NotDup_NotDel
ALG1L	NotDup_Del
ALG2	Dup_Del
ALG3	Dup_NotDel
ALG5	NotDup_Del
ALG6	Dup_Del
ALG8	Dup_Del
ALG9	NotDup_Del
ALG9	NotDup_Del
ALK	NA
ALKBH1	NotDup_NotDel
ALKBH2	Dup_NotDel
ALKBH3	Dup_NotDel
ALKBH4	NA
ALKBH5	NA
ALKBH6	Dup_NotDel
ALKBH7	NA
ALKBH8	NotDup_NotDel
ALLC	Dup_Del
ALMS1	NA
ALOX12	NotDup_Del
ALOX12B	Dup_Del
ALOX15	NA
ALOX15B	NotDup_NotDel
ALOX5	Dup_Del
ALOX5AP	Dup_Del
ALOXE3	NotDup_Del
ALPI	NA
ALPK1	Dup_Del
ALPK2	Dup_NotDel
ALPK3	NA
ALPL	NA
ALPP	NA
ALPPL2	NA
ALS2	NotDup_Del
ALS2CL	NotDup_Del
ALS2CR11	NotDup_Del
ALS2CR12	Dup_Del
ALX1	NotDup_Del
ALX3	NotDup_NotDel
ALX4	Dup_NotDel
ALYREF	Dup_NotDel
AMACR	Dup_Del
AMBN	NA
AMBP	NotDup_Del
AMBRA1	Dup_Del
AMD1	Dup_Del
AMDHD1	NotDup_NotDel
AMDHD2	Dup_Del
AMELX	NA
AMELY	NA
AMER1	NA
AMER2	Dup_NotDel
AMER3	Dup_Del
AMFR	NotDup_Del
AMH	NA
AMHR2	NotDup_Del
AMICA1	Dup_Del
AMIGO1	NotDup_NotDel
AMIGO2	NotDup_NotDel
AMIGO3	NotDup_Del
AMMECR1	NA
AMMECR1L	NotDup_NotDel
AMN	NotDup_Del
AMN1	NotDup_Del
AMOT	NA
AMOTL1	NotDup_NotDel
AMOTL2	NotDup_NotDel
AMPD1	NotDup_Del
AMPD2	Dup_NotDel
AMPD3	NotDup_Del
AMPH	NA
AMT	NotDup_Del
AMTN	Dup_Del
AMY1A	NA
AMY1B	NA
AMY1C	NA
AMY2A	NA
AMY2B	NA
AMZ1	Dup_Del
AMZ2	NotDup_Del
ANAPC1	NA
ANAPC10	NotDup_NotDel
ANAPC11	Dup_Del
ANAPC13	NotDup_NotDel
ANAPC15	NA
ANAPC16	NotDup_NotDel
ANAPC2	Dup_Del
ANAPC4	NotDup_NotDel
ANAPC5	NotDup_Del
ANAPC7	Dup_Del
ANG	Dup_Del
ANGEL1	NotDup_NotDel
ANGEL2	NotDup_Del
ANGPT1	Dup_NotDel
ANGPT2	Dup_Del
ANGPT4	Dup_Del
ANGPTL1	NotDup_Del
ANGPTL2	NotDup_Del
ANGPTL3	NotDup_Del
ANGPTL4	Dup_Del
ANGPTL5	Dup_Del
ANGPTL6	Dup_NotDel
ANGPTL7	NotDup_NotDel
ANHX	NA
ANK1	Dup_NotDel
ANK2	NotDup_Del
ANK3	NotDup_Del
ANKAR	NotDup_Del
ANKDD1A	NotDup_Del
ANKEF1	Dup_Del
ANKFN1	NotDup_NotDel
ANKFY1	Dup_Del
ANKH	Dup_Del
ANKHD1	NotDup_NotDel
ANKHD1-EIF4EBP3	NotDup_NotDel
ANKIB1	Dup_Del
ANKK1	NotDup_Del
ANKLE1	Dup_Del
ANKLE2	NA
ANKMY1	Dup_NotDel
ANKMY2	Dup_Del
ANKRA2	NotDup_NotDel
ANKRD1	NotDup_Del
ANKRD10	NotDup_NotDel
ANKRD11	NotDup_Del
ANKRD12	NotDup_NotDel
ANKRD13A	NotDup_Del
ANKRD13B	Dup_Del
ANKRD13C	Dup_NotDel
ANKRD13D	NotDup_Del
ANKRD16	NotDup_Del
ANKRD17	NotDup_Del
ANKRD18A	NA
ANKRD18B	NA
ANKRD2	NotDup_Del
ANKRD20A1	NA
ANKRD20A2	NA
ANKRD20A3	NA
ANKRD20A4	NA
ANKRD22	NotDup_NotDel
ANKRD23	NA
ANKRD24	NA
ANKRD26	NA
ANKRD27	NA
ANKRD28	Dup_Del
ANKRD29	NotDup_Del
ANKRD30A	NA
ANKRD30B	NA
ANKRD31	NA
ANKRD32	NotDup_Del
ANKRD33	NA
ANKRD34A	NA
ANKRD34B	NotDup_NotDel
ANKRD34C	NA
ANKRD35	NA
ANKRD36	NA
ANKRD36C	NA
ANKRD37	Dup_Del
ANKRD39	NA
ANKRD40	NotDup_NotDel
ANKRD42	Dup_Del
ANKRD44	NotDup_NotDel
ANKRD45	NotDup_NotDel
ANKRD46	Dup_NotDel
ANKRD49	Dup_NotDel
ANKRD50	NotDup_NotDel
ANKRD52	Dup_NotDel
ANKRD53	Dup_NotDel
ANKRD54	Dup_NotDel
ANKRD55	NotDup_Del
ANKRD6	Dup_Del
ANKRD60	NA
ANKRD62	NA
ANKRD63	NA
ANKRD65	NA
ANKRD66	NA
ANKRD7	NotDup_Del
ANKRD9	NA
ANKS1A	NotDup_Del
ANKS1B	NotDup_Del
ANKS3	NotDup_Del
ANKS4B	Dup_Del
ANKS6	NotDup_Del
ANKUB1	NotDup_Del
ANKZF1	Dup_Del
ANLN	NotDup_Del
ANO1	Dup_NotDel
ANO10	Dup_Del
ANO2	NotDup_Del
ANO3	NA
ANO4	NotDup_Del
ANO5	Dup_Del
ANO6	NotDup_Del
ANO7	Dup_Del
ANO8	NA
ANO9	Dup_Del
ANP32A	NotDup_NotDel
ANP32B	Dup_Del
ANP32D	NotDup_NotDel
ANP32E	Dup_NotDel
ANPEP	Dup_Del
ANTXR1	Dup_Del
ANTXR2	NotDup_NotDel
ANTXRL	NA
ANXA1	NA
ANXA10	NotDup_Del
ANXA11	NA
ANXA13	Dup_Del
ANXA2	Dup_Del
ANXA2R	NotDup_NotDel
ANXA3	NotDup_Del
ANXA4	Dup_NotDel
ANXA5	Dup_Del
ANXA6	NotDup_NotDel
ANXA7	NotDup_Del
ANXA8	NA
ANXA8L1	NA
ANXA8L2	NA
ANXA9	Dup_Del
AOAH	NotDup_NotDel
AOC1	NA
AOC2	NotDup_NotDel
AOC3	NotDup_Del
AOX1	NotDup_Del
AP000349.1	NA
AP000867.1	NA
AP000889.3	Dup_NotDel
AP000974.1	NA
AP001652.1	NA
AP001885.1	NA
AP002348.1	NA
AP002884.2	NA
AP003062.1	NA
AP003733.1	NA
AP1AR	Dup_Del
AP1B1	NA
AP1G1	NotDup_Del
AP1G2	NotDup_Del
AP1M1	NotDup_NotDel
AP1M2	Dup_NotDel
AP1S1	NotDup_Del
AP1S2	NA
AP1S3	NotDup_NotDel
AP2A1	NotDup_NotDel
AP2A2	Dup_Del
AP2B1	NotDup_NotDel
AP2M1	Dup_NotDel
AP2S1	NotDup_Del
AP3B1	NotDup_Del
AP3B2	Dup_NotDel
AP3D1	Dup_NotDel
AP3M1	NotDup_Del
AP3M2	Dup_NotDel
AP3S1	NotDup_Del
AP3S2	NA
AP4B1	NotDup_Del
AP4E1	Dup_Del
AP4M1	NA
AP4S1	NotDup_Del
AP5M1	NotDup_Del
AP5S1	Dup_NotDel
AP5Z1	NA
APAF1	NotDup_Del
APBA1	NA
APBA2	NA
APBA3	NA
APBB1	NotDup_NotDel
APBB1IP	NA
APBB2	NotDup_Del
APBB3	NotDup_NotDel
APC	NotDup_NotDel
APC2	Dup_NotDel
APCDD1	NA
APCDD1L	NA
APCS	Dup_NotDel
APEH	Dup_Del
APEX1	Dup_NotDel
APEX2	NA
APH1A	Dup_NotDel
APH1B	Dup_NotDel
API5	NotDup_NotDel
APIP	Dup_Del
APITD1	NA
APITD1-CORT	Dup_Del
APLF	Dup_Del
APLN	NA
APLNR	NotDup_NotDel
APLP1	NotDup_Del
APLP2	Dup_Del
APMAP	Dup_NotDel
APOA1	Dup_Del
APOA1BP	NotDup_Del
APOA2	Dup_NotDel
APOA4	Dup_Del
APOA5	Dup_Del
APOB	Dup_Del
APOBEC1	NA
APOBEC2	NotDup_NotDel
APOBEC3A	NA
APOBEC3B	NA
APOBEC3C	NA
APOBEC3D	NA
APOBEC3F	NA
APOBEC3G	NA
APOBEC3H	NotDup_Del
APOBEC4	Dup_NotDel
APOBR	NA
APOC1	NotDup_Del
APOC2	Dup_NotDel
APOC3	Dup_Del
APOC4	Dup_NotDel
APOD	NA
APOE	NotDup_NotDel
APOF	Dup_NotDel
APOH	Dup_Del
APOL1	NA
APOL2	NA
APOL3	NA
APOL4	NotDup_Del
APOL5	Dup_Del
APOL6	Dup_NotDel
APOLD1	NotDup_NotDel
APOM	NotDup_NotDel
APOO	NA
APOOL	NA
APOPT1	Dup_Del
APP	Dup_Del
APPBP2	NA
APPL1	NotDup_NotDel
APPL2	NotDup_Del
APRT	Dup_Del
APTX	NA
AQP1	NA
AQP10	Dup_NotDel
AQP11	Dup_Del
AQP12A	NA
AQP12B	NA
AQP2	Dup_Del
AQP3	Dup_NotDel
AQP4	Dup_NotDel
AQP5	Dup_NotDel
AQP6	NotDup_NotDel
AQP7	Dup_Del
AQP8	Dup_Del
AQP9	NotDup_Del
AQPEP	Dup_NotDel
AQR	NotDup_Del
AR	NA
ARAF	NA
ARAP1	Dup_Del
ARAP2	NotDup_Del
ARAP3	NotDup_Del
ARC	NA
ARCN1	Dup_NotDel
AREG	NA
AREGB	NA
AREL1	Dup_NotDel
ARF1	NotDup_NotDel
ARF3	NotDup_Del
ARF4	Dup_NotDel
ARF5	Dup_Del
ARF6	NotDup_NotDel
ARFGAP1	Dup_Del
ARFGAP2	NotDup_Del
ARFGAP3	NotDup_Del
ARFGEF1	Dup_Del
ARFGEF2	Dup_Del
ARFIP1	NotDup_NotDel
ARFIP2	NotDup_NotDel
ARFRP1	Dup_Del
ARG1	Dup_Del
ARG2	Dup_Del
ARGFX	NA
ARGLU1	NotDup_NotDel
ARHGAP1	Dup_Del
ARHGAP10	NotDup_Del
ARHGAP11A	NA
ARHGAP11B	NA
ARHGAP12	NotDup_Del
ARHGAP15	Dup_Del
ARHGAP17	NotDup_Del
ARHGAP18	Dup_Del
ARHGAP19	NotDup_Del
ARHGAP19-SLIT1	NotDup_Del
ARHGAP20	NotDup_Del
ARHGAP21	NotDup_NotDel
ARHGAP22	NotDup_Del
ARHGAP23	NA
ARHGAP24	NotDup_Del
ARHGAP25	Dup_NotDel
ARHGAP26	NotDup_Del
ARHGAP27	Dup_Del
ARHGAP28	Dup_Del
ARHGAP29	NotDup_NotDel
ARHGAP30	Dup_Del
ARHGAP31	NotDup_NotDel
ARHGAP32	Dup_Del
ARHGAP33	NotDup_NotDel
ARHGAP35	NotDup_NotDel
ARHGAP36	NA
ARHGAP39	NA
ARHGAP4	NA
ARHGAP40	NA
ARHGAP42	NA
ARHGAP44	Dup_NotDel
ARHGAP5	NotDup_NotDel
ARHGAP6	NA
ARHGAP8	NA
ARHGAP9	Dup_Del
ARHGDIA	Dup_NotDel
ARHGDIB	NotDup_NotDel
ARHGDIG	Dup_Del
ARHGEF1	Dup_Del
ARHGEF10	NA
ARHGEF10L	NotDup_NotDel
ARHGEF11	NotDup_Del
ARHGEF12	Dup_NotDel
ARHGEF15	Dup_Del
ARHGEF16	Dup_Del
ARHGEF17	Dup_NotDel
ARHGEF18	NotDup_Del
ARHGEF19	Dup_NotDel
ARHGEF2	Dup_NotDel
ARHGEF25	Dup_NotDel
ARHGEF26	Dup_Del
ARHGEF28	NotDup_Del
ARHGEF3	NotDup_Del
ARHGEF33	NA
ARHGEF35	NA
ARHGEF37	NotDup_Del
ARHGEF38	NA
ARHGEF39	Dup_Del
ARHGEF4	NA
ARHGEF40	NotDup_Del
ARHGEF5	NA
ARHGEF6	NA
ARHGEF7	NotDup_NotDel
ARHGEF9	NA
ARID1A	NotDup_Del
ARID1B	NotDup_Del
ARID2	NotDup_NotDel
ARID3A	Dup_NotDel
ARID3B	NotDup_NotDel
ARID3C	Dup_NotDel
ARID4A	NotDup_Del
ARID4B	NotDup_Del
ARID5A	NA
ARID5B	NotDup_NotDel
ARIH1	NA
ARIH2	NotDup_Del
ARIH2OS	NotDup_Del
ARL1	NotDup_NotDel
ARL10	NA
ARL11	Dup_Del
ARL13B	Dup_Del
ARL14	Dup_NotDel
ARL14EP	Dup_Del
ARL15	NotDup_NotDel
ARL16	NotDup_NotDel
ARL17	NA
ARL17A	NA
ARL17B	NA
ARL2	NA
ARL2BP	NotDup_Del
ARL3	Dup_Del
ARL4A	NotDup_NotDel
ARL4C	NotDup_NotDel
ARL4D	Dup_NotDel
ARL5A	Dup_Del
ARL5B	NotDup_Del
ARL5C	NA
ARL6	Dup_Del
ARL6IP1	Dup_NotDel
ARL6IP4	NA
ARL6IP5	NA
ARL6IP6	NotDup_Del
ARL8A	NotDup_NotDel
ARL8B	Dup_Del
ARL9	NotDup_Del
ARMC1	NotDup_NotDel
ARMC10	NotDup_Del
ARMC12	Dup_NotDel
ARMC2	NotDup_Del
ARMC3	NotDup_NotDel
ARMC4	NA
ARMC5	Dup_NotDel
ARMC6	NotDup_Del
ARMC7	NotDup_Del
ARMC8	NotDup_NotDel
ARMC9	Dup_Del
ARMCX1	NA
ARMCX2	NA
ARMCX3	NA
ARMCX5	NA
ARMCX6	NA
ARMS2	NA
ARNT	Dup_NotDel
ARNT2	NotDup_NotDel
ARNTL	NotDup_NotDel
ARNTL2	NA
ARPC1A	NotDup_Del
ARPC1B	Dup_Del
ARPC2	Dup_NotDel
ARPC3	Dup_Del
ARPC4	Dup_NotDel
ARPC4-TTLL3	NotDup_Del
ARPC5	NotDup_NotDel
ARPC5L	NotDup_NotDel
ARPP19	Dup_NotDel
ARPP21	NotDup_Del
ARR3	NA
ARRB1	NA
ARRB2	NA
ARRDC1	Dup_NotDel
ARRDC2	NotDup_NotDel
ARRDC3	NotDup_NotDel
ARRDC4	NotDup_Del
ARRDC5	NotDup_NotDel
ARSA	Dup_Del
ARSB	NotDup_NotDel
ARSD	NA
ARSE	NA
ARSF	NA
ARSG	NotDup_Del
ARSH	NA
ARSI	NotDup_NotDel
ARSJ	NotDup_NotDel
ARSK	Dup_Del
ART1	Dup_Del
ART3	Dup_Del
ART4	NotDup_NotDel
ART5	NotDup_Del
ARTN	NA
ARV1	Dup_NotDel
ARVCF	NA
ARX	NA
AS3MT	NotDup_Del
ASAH1	NA
ASAH2	NA
ASAH2B	NA
ASAH2C	NA
ASAP1	NotDup_Del
ASAP2	Dup_Del
ASAP3	Dup_NotDel
ASB1	Dup_NotDel
ASB10	Dup_NotDel
ASB11	NA
ASB12	NA
ASB13	Dup_NotDel
ASB14	NotDup_Del
ASB15	Dup_Del
ASB16	NotDup_NotDel
ASB17	NotDup_NotDel
ASB18	Dup_Del
ASB2	Dup_NotDel
ASB3	Dup_Del
ASB4	NotDup_Del
ASB5	Dup_Del
ASB6	Dup_Del
ASB7	NA
ASB8	NotDup_Del
ASB9	NA
ASCC1	NotDup_Del
ASCC2	NA
ASCC3	NotDup_Del
ASCL1	NotDup_NotDel
ASCL2	NA
ASCL3	Dup_Del
ASCL4	NotDup_NotDel
ASCL5	NA
ASF1A	Dup_Del
ASF1B	NotDup_Del
ASGR1	NotDup_NotDel
ASGR2	NotDup_Del
ASH1L	NotDup_NotDel
ASH2L	Dup_Del
ASIC1	NotDup_NotDel
ASIC2	NA
ASIC3	NotDup_Del
ASIC4	Dup_NotDel
ASIC5	Dup_Del
ASIP	Dup_Del
ASL	NA
ASMT	NA
ASMTL	NA
ASNA1	NotDup_Del
ASNS	Dup_Del
ASNSD1	NotDup_Del
ASPA	Dup_Del
ASPDH	NA
ASPG	NotDup_NotDel
ASPH	NotDup_Del
ASPHD1	NA
ASPHD2	Dup_NotDel
ASPM	Dup_Del
ASPN	Dup_Del
ASPRV1	Dup_Del
ASPSCR1	Dup_NotDel
ASRGL1	NA
ASS1	NotDup_Del
ASTE1	Dup_Del
ASTL	NA
ASTN1	NotDup_Del
ASTN2	NotDup_Del
ASUN	NotDup_Del
ASXL1	NotDup_Del
ASXL2	Dup_Del
ASXL3	NotDup_Del
ASZ1	Dup_Del
ATAD1	NotDup_NotDel
ATAD2	NotDup_NotDel
ATAD2B	Dup_NotDel
ATAD3A	NA
ATAD3B	NA
ATAD3C	NA
ATAD5	NA
ATAT1	NotDup_Del
ATCAY	NotDup_NotDel
ATE1	Dup_Del
ATF1	NotDup_Del
ATF2	NotDup_Del
ATF3	NotDup_NotDel
ATF4	NotDup_NotDel
ATF5	NA
ATF6	NotDup_Del
ATF6B	NotDup_Del
ATF7	NotDup_NotDel
ATF7IP	NotDup_NotDel
ATF7IP2	Dup_Del
ATG10	NotDup_Del
ATG12	NotDup_Del
ATG13	Dup_Del
ATG14	Dup_NotDel
ATG16L1	Dup_NotDel
ATG16L2	Dup_NotDel
ATG2A	NotDup_Del
ATG2B	Dup_Del
ATG3	NotDup_Del
ATG4A	NA
ATG4B	NA
ATG4C	NotDup_Del
ATG4D	Dup_Del
ATG5	NotDup_Del
ATG7	NotDup_NotDel
ATG9A	Dup_Del
ATG9B	NA
ATHL1	Dup_Del
ATIC	Dup_NotDel
ATL1	NotDup_Del
ATL2	Dup_NotDel
ATL3	Dup_NotDel
ATM	Dup_Del
ATMIN	Dup_NotDel
ATN1	Dup_Del
ATOH1	Dup_NotDel
ATOH7	NA
ATOH8	NotDup_NotDel
ATOX1	NotDup_NotDel
ATP10A	Dup_Del
ATP10B	NotDup_Del
ATP10D	Dup_Del
ATP11A	NA
ATP11B	Dup_Del
ATP11C	NA
ATP12A	NA
ATP13A1	NotDup_NotDel
ATP13A2	Dup_Del
ATP13A3	Dup_Del
ATP13A4	NA
ATP13A5	NA
ATP1A1	NotDup_Del
ATP1A2	Dup_NotDel
ATP1A3	NotDup_NotDel
ATP1A4	Dup_Del
ATP1B1	NotDup_NotDel
ATP1B2	NotDup_Del
ATP1B3	Dup_NotDel
ATP1B4	NA
ATP2A1	NA
ATP2A2	NotDup_Del
ATP2A3	Dup_Del
ATP2B1	NotDup_Del
ATP2B2	NotDup_NotDel
ATP2B3	NA
ATP2B4	NotDup_NotDel
ATP2C1	Dup_Del
ATP2C2	Dup_Del
ATP4A	NotDup_Del
ATP4B	Dup_Del
ATP5A1	Dup_NotDel
ATP5B	NotDup_NotDel
ATP5C1	Dup_Del
ATP5D	NA
ATP5E	NotDup_NotDel
ATP5EP2	Dup_NotDel
ATP5F1	Dup_NotDel
ATP5G1	Dup_Del
ATP5G2	NotDup_NotDel
ATP5G3	NotDup_NotDel
ATP5H	NotDup_Del
ATP5I	Dup_Del
ATP5J	Dup_Del
ATP5J2	Dup_Del
ATP5J2-PTCD1	Dup_Del
ATP5L	Dup_NotDel
ATP5L2	Dup_NotDel
ATP5O	Dup_NotDel
ATP5S	Dup_Del
ATP5SL	NotDup_Del
ATP6AP1	NA
ATP6AP1L	NotDup_NotDel
ATP6AP2	NA
ATP6V0A1	NotDup_Del
ATP6V0A2	NotDup_Del
ATP6V0A4	Dup_Del
ATP6V0B	Dup_Del
ATP6V0C	Dup_NotDel
ATP6V0D1	NotDup_Del
ATP6V0D2	NotDup_NotDel
ATP6V0E1	Dup_Del
ATP6V0E2	NotDup_NotDel
ATP6V1A	NotDup_Del
ATP6V1B1	Dup_NotDel
ATP6V1B2	Dup_NotDel
ATP6V1C1	NotDup_NotDel
ATP6V1C2	Dup_Del
ATP6V1D	Dup_Del
ATP6V1E1	Dup_Del
ATP6V1E2	Dup_NotDel
ATP6V1F	NotDup_Del
ATP6V1G1	Dup_NotDel
ATP6V1G2	NotDup_NotDel
ATP6V1G3	Dup_Del
ATP6V1H	NotDup_NotDel
ATP7A	NA
ATP7B	Dup_Del
ATP8A1	NotDup_Del
ATP8A2	NA
ATP8B1	Dup_Del
ATP8B2	NotDup_Del
ATP8B3	NotDup_Del
ATP8B4	NotDup_NotDel
ATP9A	Dup_Del
ATP9B	NA
ATPAF1	Dup_NotDel
ATPAF2	NotDup_Del
ATPIF1	NotDup_Del
ATR	NotDup_Del
ATRAID	Dup_NotDel
ATRIP	Dup_Del
ATRN	Dup_Del
ATRNL1	NotDup_Del
ATRX	NA
ATXN1	NA
ATXN10	NotDup_NotDel
ATXN1L	NA
ATXN2	NotDup_NotDel
ATXN2L	NA
ATXN3	Dup_NotDel
ATXN3L	NA
ATXN7	NotDup_NotDel
ATXN7L1	NotDup_Del
ATXN7L2	NotDup_NotDel
ATXN7L3	NotDup_NotDel
AUH	NotDup_Del
AUNIP	NotDup_NotDel
AUP1	Dup_NotDel
AURKA	NotDup_NotDel
AURKAIP1	Dup_Del
AURKB	Dup_Del
AURKC	Dup_NotDel
AUTS2	NotDup_Del
AVEN	NA
AVIL	Dup_Del
AVL9	NA
AVP	Dup_Del
AVPI1	Dup_NotDel
AVPR1A	NotDup_Del
AVPR1B	NotDup_Del
AVPR2	NA
AWAT1	NA
AWAT2	NA
AXDND1	NotDup_Del
AXIN1	Dup_NotDel
AXIN2	NotDup_Del
AXL	Dup_NotDel
AZGP1	NA
AZI1	NotDup_Del
AZI2	Dup_Del
AZIN1	NotDup_NotDel
AZU1	Dup_Del
B2M	NotDup_NotDel
B3GALNT1	NA
B3GALNT2	Dup_Del
B3GALT1	NotDup_NotDel
B3GALT2	NotDup_NotDel
B3GALT4	NotDup_NotDel
B3GALT5	Dup_NotDel
B3GALT6	NA
B3GALTL	NotDup_Del
B3GAT1	NotDup_Del
B3GAT2	NotDup_NotDel
B3GAT3	Dup_NotDel
B3GNT1	NotDup_NotDel
B3GNT2	Dup_Del
B3GNT3	Dup_NotDel
B3GNT4	NotDup_Del
B3GNT5	Dup_NotDel
B3GNT6	Dup_NotDel
B3GNT7	NA
B3GNT8	Dup_Del
B3GNT9	NA
B3GNTL1	NA
B4GALNT1	Dup_NotDel
B4GALNT2	NotDup_Del
B4GALNT3	Dup_Del
B4GALNT4	Dup_Del
B4GALT1	Dup_NotDel
B4GALT2	Dup_NotDel
B4GALT3	Dup_NotDel
B4GALT4	NotDup_Del
B4GALT5	NotDup_Del
B4GALT6	NotDup_NotDel
B4GALT7	Dup_NotDel
B9D1	Dup_Del
B9D2	Dup_NotDel
BAALC	NA
BAAT	Dup_Del
BABAM1	Dup_Del
BACE1	Dup_Del
BACE2	Dup_NotDel
BACH1	Dup_Del
BACH2	NotDup_Del
BAD	NA
BAG1	Dup_Del
BAG2	Dup_NotDel
BAG3	Dup_Del
BAG4	Dup_NotDel
BAG5	Dup_NotDel
BAG6	NotDup_NotDel
BAGE5	NA
BAHD1	NotDup_NotDel
BAI1	NotDup_Del
BAI2	Dup_NotDel
BAI3	NotDup_Del
BAIAP2	NotDup_NotDel
BAIAP2L1	Dup_Del
BAIAP2L2	Dup_Del
BAIAP3	Dup_Del
BAK1	NotDup_NotDel
BAMBI	NotDup_NotDel
BANF1	NotDup_NotDel
BANF2	Dup_NotDel
BANK1	NotDup_Del
BANP	NA
BAP1	Dup_Del
BARD1	NotDup_Del
BARHL1	NotDup_NotDel
BARHL2	NotDup_NotDel
BARX1	NotDup_NotDel
BARX2	Dup_Del
BASP1	NA
BATF	NotDup_NotDel
BATF2	NotDup_NotDel
BATF3	NotDup_NotDel
BAX	NotDup_NotDel
BAZ1A	Dup_NotDel
BAZ1B	NA
BAZ2A	NotDup_Del
BAZ2B	NotDup_Del
BBC3	NA
BBIP1	NA
BBOX1	Dup_Del
BBS1	NotDup_Del
BBS10	NotDup_NotDel
BBS12	Dup_NotDel
BBS2	NotDup_Del
BBS4	NA
BBS5	Dup_Del
BBS7	Dup_Del
BBS9	NA
BBX	NotDup_Del
BCAM	Dup_Del
BCAN	Dup_NotDel
BCAP29	Dup_Del
BCAP31	NA
BCAR1	Dup_NotDel
BCAR3	NotDup_NotDel
BCAS1	NotDup_Del
BCAS2	NotDup_Del
BCAS3	NA
BCAS4	NotDup_Del
BCAT1	Dup_Del
BCAT2	NA
BCCIP	Dup_Del
BCDIN3D	Dup_Del
BCHE	NA
BCKDHA	NotDup_Del
BCKDHB	NA
BCKDK	NotDup_NotDel
BCL10	NotDup_NotDel
BCL11A	Dup_Del
BCL11B	NotDup_NotDel
BCL2	NotDup_NotDel
BCL2A1	Dup_Del
BCL2L1	Dup_NotDel
BCL2L10	NotDup_NotDel
BCL2L11	NotDup_NotDel
BCL2L12	Dup_NotDel
BCL2L13	Dup_Del
BCL2L14	NA
BCL2L15	NotDup_Del
BCL2L2	NotDup_NotDel
BCL3	NotDup_Del
BCL6	Dup_NotDel
BCL6B	NotDup_NotDel
BCL7A	NotDup_NotDel
BCL7B	NA
BCL7C	NotDup_Del
BCL9	NA
BCL9L	Dup_Del
BCLAF1	NA
BCMO1	Dup_Del
BCO2	NA
BCOR	NA
BCORL1	NA
BCR	NA
BCS1L	NotDup_NotDel
BDH1	NA
BDH2	NotDup_Del
BDKRB1	NA
BDKRB2	NA
BDNF	NotDup_NotDel
BDP1	NotDup_Del
BEAN1	NA
BECN1	NotDup_NotDel
BEGAIN	Dup_NotDel
BEND2	NA
BEND3	NotDup_Del
BEND4	NotDup_NotDel
BEND5	NotDup_NotDel
BEND6	NotDup_Del
BEND7	NotDup_NotDel
BEST1	Dup_Del
BEST2	Dup_Del
BEST3	Dup_Del
BEST4	Dup_Del
BET1	NotDup_Del
BET1L	NotDup_Del
BEX1	NA
BEX2	NA
BEX4	NA
BEX5	NA
BFAR	NA
BFSP1	Dup_NotDel
BFSP2	NotDup_NotDel
BGLAP	Dup_NotDel
BGN	NA
BHLHA15	NA
BHLHA9	NA
BHLHB9	NA
BHLHE22	NA
BHLHE23	NA
BHLHE40	Dup_NotDel
BHLHE41	NotDup_Del
BHMT	Dup_Del
BHMT2	Dup_NotDel
BICC1	NotDup_NotDel
BICD1	NotDup_NotDel
BICD2	NotDup_NotDel
BID	Dup_Del
BIK	NA
BIN1	NotDup_NotDel
BIN2	NA
BIN3	Dup_NotDel
BIRC2	Dup_NotDel
BIRC3	Dup_NotDel
BIRC5	NotDup_NotDel
BIRC6	Dup_NotDel
BIRC7	Dup_NotDel
BIRC8	Dup_Del
BIVM	Dup_Del
BLCAP	NotDup_Del
BLID	Dup_NotDel
BLK	Dup_Del
BLM	NotDup_Del
BLMH	Dup_Del
BLNK	NotDup_NotDel
BLOC1S1	NotDup_NotDel
BLOC1S2	NotDup_Del
BLOC1S3	NA
BLOC1S4	NA
BLOC1S5	Dup_NotDel
BLOC1S6	Dup_Del
BLVRA	NotDup_Del
BLVRB	Dup_NotDel
BLZF1	NotDup_Del
BMF	NotDup_NotDel
BMI1	Dup_Del
BMP1	NotDup_Del
BMP10	Dup_NotDel
BMP15	NA
BMP2	NotDup_NotDel
BMP2K	NotDup_Del
BMP3	Dup_Del
BMP4	NotDup_NotDel
BMP5	NotDup_Del
BMP6	NotDup_NotDel
BMP7	NotDup_NotDel
BMP8A	NA
BMP8B	NA
BMPER	NA
BMPR1A	Dup_Del
BMPR1B	Dup_Del
BMPR2	NotDup_NotDel
BMS1	NA
BMX	NA
BNC1	NotDup_NotDel
BNC2	NotDup_NotDel
BNIP1	Dup_NotDel
BNIP2	Dup_Del
BNIP3	Dup_Del
BNIP3L	NotDup_NotDel
BNIPL	Dup_Del
BOC	NotDup_Del
BOD1	NotDup_NotDel
BOD1L1	NotDup_Del
BOD1L2	Dup_NotDel
BOK	Dup_NotDel
BOLA1	NotDup_NotDel
BOLA2	NA
BOLA2B	NA
BOLA3	Dup_NotDel
BOLL	NotDup_NotDel
BOP1	NA
BORA	Dup_Del
BPGM	NotDup_Del
BPHL	NotDup_NotDel
BPI	Dup_Del
BPIFA1	Dup_Del
BPIFA2	Dup_Del
BPIFA3	Dup_Del
BPIFB1	Dup_Del
BPIFB2	Dup_Del
BPIFB3	Dup_Del
BPIFB4	Dup_Del
BPIFB6	Dup_Del
BPIFC	NA
BPNT1	NotDup_Del
BPTF	NotDup_NotDel
BPY2	NA
BPY2B	NA
BPY2C	NA
BRAF	NotDup_Del
BRAP	NotDup_Del
BRAT1	Dup_Del
BRCA1	Dup_Del
BRCA2	NotDup_Del
BRCC3	NA
BRD1	NotDup_NotDel
BRD2	NotDup_Del
BRD3	NA
BRD4	NotDup_NotDel
BRD7	Dup_Del
BRD8	NotDup_Del
BRD9	NA
BRDT	Dup_Del
BRE	Dup_Del
BRF1	NA
BRF2	Dup_NotDel
BRI3	Dup_Del
BRI3BP	Dup_Del
BRICD5	Dup_NotDel
BRINP1	NotDup_Del
BRINP2	NotDup_Del
BRINP3	NotDup_Del
BRIP1	NA
BRIX1	NA
BRK1	NotDup_NotDel
BRMS1	NotDup_NotDel
BRMS1L	NotDup_NotDel
BROX	NA
BRPF1	NotDup_NotDel
BRPF3	NotDup_NotDel
BRS3	NA
BRSK1	NotDup_Del
BRSK2	Dup_Del
BRWD1	Dup_NotDel
BRWD3	NA
BSCL2	Dup_Del
BSDC1	NotDup_NotDel
BSG	Dup_NotDel
BSN	NotDup_Del
BSND	NotDup_NotDel
BSPH1	NA
BSPRY	Dup_Del
BST1	NotDup_NotDel
BST2	Dup_Del
BSX	Dup_NotDel
BTAF1	Dup_Del
BTBD1	NotDup_Del
BTBD10	NotDup_NotDel
BTBD11	NotDup_NotDel
BTBD16	Dup_Del
BTBD17	Dup_NotDel
BTBD18	NA
BTBD19	NA
BTBD2	NotDup_NotDel
BTBD3	Dup_Del
BTBD6	Dup_Del
BTBD7	Dup_NotDel
BTBD8	NA
BTBD9	NotDup_Del
BTC	NA
BTD	Dup_Del
BTF3	NotDup_Del
BTF3L4	Dup_NotDel
BTG1	NotDup_NotDel
BTG2	Dup_NotDel
BTG3	Dup_Del
BTG4	NotDup_Del
BTK	NA
BTLA	NotDup_Del
BTN1A1	Dup_Del
BTN2A1	Dup_Del
BTN2A2	Dup_Del
BTN3A1	NA
BTN3A2	Dup_Del
BTN3A3	Dup_Del
BTNL2	NotDup_Del
BTNL3	NA
BTNL8	NA
BTNL9	NA
BTRC	Dup_Del
BUB1	NA
BUB1B	NotDup_NotDel
BUB3	NotDup_Del
BUD13	NotDup_Del
BUD31	Dup_Del
BVES	NotDup_Del
BX072566.1	NA
BX072566.2	NA
BX088651.1	NA
BX088651.2	NA
BX255923.1	NA
BX842679.1	NA
BYSL	Dup_Del
BZRAP1	NotDup_Del
BZW1	NotDup_Del
BZW2	Dup_Del
C10orf10	Dup_NotDel
C10orf105	NA
C10orf107	NotDup_NotDel
C10orf11	NotDup_NotDel
C10orf111	Dup_NotDel
C10orf113	NotDup_NotDel
C10orf115	NA
C10orf118	NotDup_Del
C10orf12	Dup_NotDel
C10orf120	Dup_Del
C10orf126	NA
C10orf128	Dup_Del
C10orf129	Dup_Del
C10orf131	NA
C10orf2	Dup_NotDel
C10orf25	NA
C10orf32	NotDup_NotDel
C10orf35	NotDup_NotDel
C10orf40	NA
C10orf53	NA
C10orf54	Dup_NotDel
C10orf55	NotDup_Del
C10orf62	NotDup_NotDel
C10orf67	NA
C10orf71	NA
C10orf76	NotDup_Del
C10orf82	NotDup_Del
C10orf85	NA
C10orf88	Dup_Del
C10orf90	NotDup_Del
C10orf91	Dup_Del
C10orf95	NA
C10orf99	Dup_Del
C11orf1	NotDup_Del
C11orf16	Dup_NotDel
C11orf21	NA
C11orf24	NotDup_NotDel
C11orf30	Dup_NotDel
C11orf31	NA
C11orf35	NotDup_Del
C11orf40	NA
C11orf42	NotDup_NotDel
C11orf45	Dup_Del
C11orf48	Dup_Del
C11orf49	NotDup_NotDel
C11orf52	NotDup_Del
C11orf53	NotDup_NotDel
C11orf54	Dup_Del
C11orf57	Dup_Del
C11orf58	NotDup_NotDel
C11orf63	Dup_NotDel
C11orf65	Dup_Del
C11orf68	NA
C11orf70	Dup_Del
C11orf71	NA
C11orf72	NA
C11orf73	Dup_Del
C11orf74	NotDup_NotDel
C11orf80	NotDup_Del
C11orf82	Dup_NotDel
C11orf83	Dup_NotDel
C11orf84	Dup_NotDel
C11orf85	NotDup_Del
C11orf86	NA
C11orf87	NotDup_NotDel
C11orf88	NotDup_Del
C11orf89	NA
C11orf91	NA
C11orf94	Dup_NotDel
C11orf96	NA
C12orf23	NotDup_Del
C12orf29	NotDup_NotDel
C12orf36	NA
C12orf39	NotDup_Del
C12orf4	Dup_Del
C12orf40	Dup_Del
C12orf42	NotDup_NotDel
C12orf43	Dup_NotDel
C12orf44	NotDup_NotDel
C12orf45	Dup_Del
C12orf49	Dup_NotDel
C12orf5	Dup_NotDel
C12orf50	NotDup_Del
C12orf54	NotDup_NotDel
C12orf55	NA
C12orf56	NotDup_NotDel
C12orf57	Dup_NotDel
C12orf60	NotDup_NotDel
C12orf61	NA
C12orf65	NA
C12orf66	Dup_NotDel
C12orf68	NotDup_NotDel
C12orf71	NotDup_Del
C12orf73	NA
C12orf74	NotDup_NotDel
C12orf75	NA
C12orf76	NA
C12orf77	Dup_Del
C13orf45	NA
C14orf1	NotDup_Del
C14orf105	NotDup_Del
C14orf119	Dup_NotDel
C14orf132	NA
C14orf142	Dup_NotDel
C14orf144	NA
C14orf159	Dup_Del
C14orf164	NA
C14orf166	Dup_NotDel
C14orf166B	NotDup_NotDel
C14orf177	NotDup_Del
C14orf178	Dup_Del
C14orf180	NA
C14orf2	NotDup_Del
C14orf23	NA
C14orf28	NotDup_Del
C14orf37	NotDup_Del
C14orf39	NotDup_Del
C14orf79	Dup_NotDel
C14orf80	NA
C14orf93	Dup_NotDel
C15orf26	NotDup_NotDel
C15orf27	NotDup_NotDel
[truncated: 17,276 more rows]
