# Supplementary material for: Conserved microRNA targeting reveals preexisting gene dosage sensitivities that shaped amniote sex chromosome evolution
Source: Genome Res. 2018 Apr;28(4):474–83. doi: 10.1101/gr.230433.117 (PMC5880238; doi:10.1101/gr.230433.117)
Supplement: Supplemental Material [file supp_gr.230433.117_Supplemental_Table_S3.xlsx]

## Sheet: Ancestral X genes
Legend: Properties of ancestral X-linked genes assessed in this study
Gene	Chicken ID	In XAR	Human Y	8 mammals Y	XCI status (Balaton 2016)	Haploinsufficiency probability	Human expression breadth	Human-mouse dN/dS	Mean Pct	human-chicken conserved n. target sites	control seed human-chicken conserved n. target sites	chicken-opossum conserved n. target sites	control seed chicken-opossum conserved n. target sites
1700042B14Rik	NA	Y	FALSE	N	NA	NA	NA	NA	NA	NA	NA	NA	NA
4930557A04Rik	NA	Y	FALSE	N	NA	NA	NA	NA	NA	NA	NA	NA	NA
ABCB7	ENSGALG00000007788	N	FALSE	N	I	0.364	0.664724	0.167276	0.176742	0	0.166667	0	0
ABCD1		N	FALSE	N	I	0.376	0.295044	0.0574652	0	0	0	0	0
ACE2	ENSGALG00000016554	Y	FALSE	N	E	0.877	0.0826402	0.258893	0.140111	0	0	0	0
ACOT9	ENSGALG00000016351	Y	FALSE	N	I	0.134	0.487523	0.250395	0.00111111	1	0	2	0.833333
ACRC	ENSGALG00000020322	N	FALSE	N	I	0.031	0.176413	NA	0.016	0	0	0	0
ACSL4	ENSGALG00000008088	N	FALSE	N	I	0.889	0.460451	0.047025	0.229097	8	1.5	5	1
AFF2	ENSGALG00000009168	N	FALSE	N	I	0.299	0.143995	0.157465	0.0622239	10	4.66667	3	3.66667
AGTR2	ENSGALG00000005936	N	FALSE	N	I	0.555	0.0402951	0.103705	0.0367333	0	0	0	0
AIFM1	ENSGALG00000004003	N	FALSE	N	I	0.282	0.369611	0.156706	0.0233667	7	5.83333	3	6.66667
AKAP14	ENSGALG00000020261	N	FALSE	N	I	0.046	0.037862	0.52509	NA	0	0	0	0
AKAP16B	NA	N	FALSE	N	NA	NA	NA	NA	NA	NA	NA	NA	NA
AKAP4		N	FALSE	N	I	0.101	0.0316984	0.233436	0.0523333	0	0	0	0
ALAS2	ENSGALG00000035015	N	FALSE	N	I	0.82	0.0357103	0.123418	0	0	0	0	0
ALG13	ENSGALG00000007976	N	FALSE	N	VE	NA	0.499708	NA	0.0347778	2	0.166667	0	0
AMELX		Y	TRUE	Y	No call	0.129	0.0914415	0.518746	0.015	0	0	0	0
AMMECR1	ENSGALG00000008074	N	FALSE	N	I	0.851	0.317724	0.0628019	0.286439	29	17.1667	24	14.5
AMOT	ENSGALG00000007952	N	FALSE	N	I	0.327	0.318852	0.145854	0.187978	0	0.333333	0	0
ANKRD58	NA	N	FALSE	N	NA	0.248	NA	0.277802	NA	NA	NA	NA	NA
AP1S2	ENSGALG00000016551	Y	FALSE	N	E	0.715	0.430122	0.164125	0.185167	11	3.66667	13	5.33333
APEX2		N	FALSE	N	I	0.067	0.528295	0.331909	0.0153	0	0	0	0
APLN		N	FALSE	N	I	0.014	0.206493	0.147373	0.13344	0	0	0	0
APOO	ENSGALG00000016345	Y	FALSE	N	I	0.32	0.384843	0.323313	0.234	0	0	0	0
APOOL	ENSGALG00000006978	N	FALSE	N	I	0.112	0.44069	0.31449	0.0336383	0	0	0	0
AR	ENSGALG00000030879	N	FALSE	N	I	0.99	0.265367	0.144456	0.0618393	6	2.16667	6	1.5
ARAF		N	FALSE	N	I	0.969	0.614321	0.0492016	0.0701111	0	0	0	0
ARHGAP36	ENSGALG00000007160	N	FALSE	N	No call	NA	0.050177	0.26924	0.154533	0	0	0	0
ARHGAP4		N	FALSE	N	Discordant	0.105	0.114977	0.113465	0.0393333	0	0	0	0
ARHGAP6	ENSGALG00000016602	Y	FALSE	N	I	0.164	0.265417	0.167568	0.300857	9	4.83333	13	4.66667
ARHGEF6	ENSGALG00000006439	N	FALSE	N	I	0.277	0.43904	0.104954	0.098	3	1.16667	1	0.5
ARHGEF9	ENSGALG00000007608	N	FALSE	N	I	0.209	0.249195	0.0206319	0.0285172	6	3.83333	9	3.5
ARL13A	ENSGALG00000006636	N	FALSE	N	I	0.114	0.0396099	0.479608	0.0666667	0	0	0	0
ARR3	ENSGALG00000004251	N	FALSE	N	I	0.658	0.323168	0.232928	0	0	NA	0	0
ARX	ENSGALG00000042604	Y	FALSE	N	No call	0.778	0.169166	0.0266861	0.450286	0	0	0	0
ASB11	ENSGALG00000016562	Y	FALSE	N	VE	0.145	0.088196	0.150594	0.0340556	0	0	0	0
ASB12	ENSGALG00000007594	N	FALSE	N	I	0.151	0.0345177	0.123746	0	0	NA	0	0
ASB9	ENSGALG00000016563	Y	FALSE	N	I	0.017	0.0629053	0.240334	0.0376	0	0.333333	0	0.333333
ATG4A	ENSGALG00000008282	N	FALSE	N	I	0.189	0.579778	0.109792	0.125091	0	0.166667	0	0.833333
ATP11C	ENSGALG00000006623	N	FALSE	N	I	0.416	0.420617	0.0783613	0.0666571	1	1	2	1
ATP1B4	ENSGALG00000008593	N	FALSE	N	No call	0.149	0.0347917	0.196416	0.110053	0	0	0	0
ATP2B3		N	FALSE	N	Discordant	0.34	0.110993	0.0123665	0.0489355	2	0.5	2	0.333333
ATP6AP1	ENSGALG00000008836	N	FALSE	N	I	0.065	0.426436	0.126477	0.0282	0	0	0	0
ATP6AP2	ENSGALG00000016241	Y	FALSE	N	I	0.131	0.463421	0.0826362	0.376	0	0.166667	0	0.166667
ATP7A	ENSGALG00000007902	N	FALSE	N	I	0.188	0.345294	0.126521	0.170659	0	0	2	0
ATRX	ENSGALG00000007843	N	FALSE	Y	I	NA	0.421102	0.165873	0.207364	21	14.5	16	12.3333
AVPR2	ENSGALG00000009497	N	FALSE	N	Discordant	0.153	0.207656	0.102288	0.0146667	0	0	0	0
BCAP31	ENSGALG00000035236	N	FALSE	N	I	0.195	0.55742	0.132938	0.2062	0	0	0	0
BCOR	ENSGALG00000016245	Y	FALSE	N	I	0.299	0.412094	0.143869	0.296889	9	6.66667	12	8.83333
BCORL1	ENSGALG00000003976	N	FALSE	N	I	0.165	0.379017	0.124967	0.325476	10	2.66667	11	3.83333
BEND2	ENSGALG00000016541	Y	FALSE	N	VE	NA	0.036392	NA	0.0184706	0	0	0	0
BGN		N	FALSE	N	I	NA	0.0756762	0.0219793	0.0284	0	0	0	0
BMP15	ENSGALG00000004742	N	FALSE	N	No call	0.325	0.0431992	0.452088	NA	0	NA	0	NA
BMP2KL		N	FALSE	N	NA	0.133	0.235478	NA	NA	NA	NA	NA	NA
BMX	ENSGALG00000016557	Y	FALSE	N	No call	0.486	0.209397	0.112102	0.0905714	0	0	0	0
BRCC3	ENSGALG00000005383	N	FALSE	N	I	0.137	0.427487	0.0482154	0.0539804	0	0	0	0
BRS3	ENSGALG00000006406	N	FALSE	N	VE	0.306	0.0956452	0.239687	0.0215556	0	0	0	0
BRWD3	ENSGALG00000007151	N	FALSE	N	I	0.66	0.471298	0.0624071	0.326746	24	7	29	9.33333
BTK	ENSGALG00000004958	N	FALSE	N	I	0.565	0.113702	0.0176222	0.038	0	0	0	0
C1GALT1C1	ENSGALG00000008513	N	FALSE	N	I	0.208	0.32359	0.306667	0.0179444	0	0	0	0
CA5B	ENSGALG00000005855	Y	FALSE	N	E	NA	0.296617	0.14879	0.0668667	0	0	0	0
CACNA1F	ENSGALG00000029356	N	FALSE	N	I	0.231	0.259642	0.0764815	NA	0	0	0	0
CAPN6	ENSGALG00000008006	N	FALSE	N	I	0.537	0.191407	0.0531491	0.245667	0	0	0	0
CASK	ENSGALG00000042400	Y	FALSE	N	I	0.996	0.48042	0.00572917	0.198638	24	14.6667	28	13.3333
CCDC120		N	FALSE	N	I	0.168	0.217637	0.127756	0.299882	0	0	0	0
CCDC160		N	FALSE	N	I	NA	0.239748	0.343436	0.0583333	0	0	0	0
CCDC22		N	FALSE	N	I	0.076	0.487898	0.109051	0	0	0	0	0
CCNB3	ENSGALG00000025810	N	FALSE	N	I	0.139	0.063164	0.659958	0	0	0	0	0
CD40LG	ENSGALG00000006415	N	FALSE	N	VE	0.548	0.12881	0.279219	0.0283	0	0	0	0
CD99L2	ENSGALG00000009075	N	FALSE	N	I	0.065	0.389309	0.229037	0.0729706	0	0.166667	0	0
CDK16		N	FALSE	N	E	NA	0.299181	0.0356527	0.1939	0	0	0	0
CDKL5	ENSGALG00000016529	Y	FALSE	N	I	0.432	0.186843	0.0689392	NA	NA	NA	0	0
CDX4	ENSGALG00000007657	N	FALSE	N	No call	0.1	0.0489644	0.168553	0.0792	0	0	0	0
CENPI	ENSGALG00000005038	N	FALSE	N	I	0.049	0.369198	0.391947	0.0126774	0	0	0	0
CETN2	ENSGALG00000007510	N	FALSE	N	I	0.206	0.444827	0.0364043	0.1158	0	0	0	0
CFP	ENSGALG00000016176	N	FALSE	N	I	0.122	0.0730278	0.251163	NA	0	0	0	0
CHIC1	ENSGALG00000040956	N	FALSE	N	I	0.302	0.402534	0.0741971	0.318	15	4.33333	7	2
CHM	ENSGALG00000006906	N	FALSE	N	Discordant	0.11	0.488255	0.193144	0.0523182	0	0.166667	0	0
CHMP1B	ENSGALG00000040746	N	FALSE	N	NA	NA	0.167852	NA	0.150333	0	0	0	0
CHRDL1	ENSGALG00000008072	N	FALSE	N	I	0.347	0.244045	0.146865	0.0721905	4	2	0	0
CHST7	ENSGALG00000031375	Y	FALSE	N	I	NA	0.390565	0.0694459	0.154828	0	0	0	0
CITED1		N	FALSE	N	Discordant	NA	0.0732477	0.273306	NA	NA	NA	0	0
CLCN4	ENSGALG00000016607	Y	FALSE	N	I	0.283	0.215724	0.00924164	0.0973947	1	0.166667	0	0.333333
CLCN5	ENSGALG00000007234	N	FALSE	N	I	0.457	0.355121	0.0409699	0.305754	2	0.166667	0	0
CLDN2	ENSGALG00000007311	N	FALSE	N	I	0.27	0.0492808	0.0819363	0.104737	0	0	0	0
CLIC2	ENSGALG00000029502	N	FALSE	N	I	0.198	0.26656	NA	0.0596111	0	0	0	0
CNGA2	ENSGALG00000007282	N	FALSE	N	No call	0.273	0.0356326	0.0560472	0.0199167	0	0	0	0
CNKSR2	ENSGALG00000016391	Y	FALSE	N	I	0.681	0.0985369	0.0205011	0.247818	11	6.33333	13	7
COX7B	ENSGALG00000007863	N	FALSE	N	VE	0.068	0.333978	0.524838	0.0451333	0	0	0	0
CSTF2	ENSGALG00000006760	N	FALSE	N	I	0.225	0.34726	0.0908841	0.153409	0	0	0	0
CTPS2	ENSGALG00000016549	Y	FALSE	N	E	0.393	0.487937	0.118696	0.0167222	0	0	0	0
CUL4B	ENSGALG00000008559	N	FALSE	N	I	0.811	0.514679	0.0652009	0.154087	6	2.83333	2	2.16667
CXCR3		N	FALSE	N	I	0.063	0.0785961	0.0966691	0.03375	0	0.166667	0	0
CXORF1	NA	N	FALSE	N	NA	NA	NA	NA	NA	NA	NA	NA	NA
CXORF21	NA	Y	FALSE	N	NA	0.171	NA	0.182588	NA	NA	NA	NA	NA
CXORF22	NA	Y	FALSE	N	NA	0.048	NA	0.36229	NA	NA	NA	NA	NA
CXORF23	NA	Y	FALSE	N	NA	0.187	NA	0.451014	NA	NA	NA	NA	NA
CXORF27	NA	Y	FALSE	N	NA	NA	NA	0.342487	NA	NA	NA	NA	NA
CXORF30	NA	Y	FALSE	N	NA	0.065	NA	NA	NA	NA	NA	NA	NA
CXORF36	NA	Y	FALSE	N	NA	0.112	NA	0.264532	NA	NA	NA	NA	NA
CXORF38	NA	Y	FALSE	N	NA	0.12	NA	0.166777	NA	NA	NA	NA	NA
CXORF40A	NA	N	FALSE	N	NA	NA	NA	0.268251	NA	NA	NA	NA	NA
CXORF40B	NA	N	FALSE	N	NA	NA	NA	NA	NA	NA	NA	NA	NA
CXORF41	NA	N	FALSE	N	NA	NA	NA	0.323244	NA	NA	NA	NA	NA
CXORF49	NA	N	FALSE	N	NA	NA	NA	NA	NA	NA	NA	NA	NA
CXORF56	NA	N	FALSE	N	NA	0.125	NA	0.0046083	NA	NA	NA	NA	NA
CXORF57	NA	N	FALSE	N	NA	0.493	NA	0.232712	NA	NA	NA	NA	NA
CXORF58	NA	Y	FALSE	N	NA	0.104	NA	NA	NA	NA	NA	NA	NA
CXORF59	NA	Y	FALSE	N	NA	NA	NA	0.344955	NA	NA	NA	NA	NA
CXORF65	NA	N	FALSE	N	NA	NA	NA	0.454424	NA	NA	NA	NA	NA
CXORF67	NA	N	FALSE	N	NA	NA	NA	NA	NA	NA	NA	NA	NA
CXORF68	NA	N	FALSE	N	NA	NA	NA	NA	NA	NA	NA	NA	NA
CXXC1P1		N	FALSE	N	No call	NA	NA	NA	NA	NA	NA	NA	NA
CYBB	ENSGALG00000016261	Y	FALSE	N	I	0.163	0.167693	0.0824282	0.0515	0	0	0	0
CYLC1		N	FALSE	N	No call	NA	0.0316585	0.911461	0.0596667	0	0	0	0
CYSLTR1	ENSGALG00000004128	N	FALSE	N	I	0.13	0.11036	0.17259	0.0596818	0	0	0	0
DACH2	ENSGALG00000006886	N	FALSE	N	Discordant	0.184	0.153462	0.0978736	0.0841667	2	2.66667	5	4
DCAF8L1	ENSGALG00000040685	Y	FALSE	N	No call	NA	0.0357963	0.476105	0.001	0	0	0	0
DCX	ENSGALG00000007993	N	FALSE	N	I	0.834	0.180849	0.0042684	0.216918	19	7.83333	10	3.33333
DDX3X	ENSGALG00000016231	Y	TRUE	Y	E	0.719	0.534753	0.039247	0.368578	55	38.8333	60	43.1667
DGAT2L6	ENSGALG00000004367	N	FALSE	N	VE	0.188	0.0344224	0.373347	0.0437273	0	0	0	0
DGKK	ENSGALG00000003841	N	FALSE	N	I	0.2	NA	NA	NA	NA	NA	NA	NA
DIAPH2	ENSGALG00000030791	N	FALSE	N	Discordant	0.46	0.350821	0.138768	0.203673	0	0.5	0	0.166667
DKC1	ENSGALG00000005054	N	FALSE	N	I	0.957	0.566718	0.112255	0.0160714	0	0	0	0
DLG3	ENSGALG00000041900	N	FALSE	N	I	0.999	0.328403	0.0102357	0.0991842	5	2.83333	1	3
DMD	ENSGALG00000016281	Y	FALSE	N	I	0.341	0.246128	0.137726	0.198051	24	9.5	26	13.1667
DNASE1L1		N	FALSE	N	I	0.154	0.336648	0.227228	0.0053	0	0	0	0
DOCK11	ENSGALG00000006017	N	FALSE	N	I	0.337	0.245724	0.0431852	0.0697838	4	3	3	1
DRP2	ENSGALG00000005031	N	FALSE	N	I	0.509	0.0423493	0.0721766	0.143208	0	0	0	0
DUSP21	ENSGALG00000007765	Y	FALSE	N	No call	NA	0.0321921	0.145927	0	0	0	0	0
DUSP9		N	FALSE	N	I	0.483	0.195138	0.0932624	0.193385	0	0	0	0
DXBay18	NA	N	FALSE	N	NA	NA	NA	NA	NA	NA	NA	NA	NA
DYNLT3	ENSGALG00000016259	Y	FALSE	N	I	0.069	0.414442	0.091358	0.00258333	0	0	0	0
E1BSZ9	NA	N	FALSE	N	NA	NA	NA	NA	NA	NA	NA	NA	NA
EBP		N	FALSE	N	I	0.197	0.199564	0.221902	0.114	0	0	0	0
EDA	ENSGALG00000035966	N	FALSE	N	I	0.303	0.323199	0.104918	0.0002	5	0.833333	0	0.166667
EDA2R	ENSGALG00000031094	N	FALSE	N	Discordant	0.02	0.275813	0.246958	0.0520333	0	0	0	0
EFHC2	ENSGALG00000016221	Y	FALSE	N	Discordant	0.09	0.172603	0.315445	0.0382143	1	0.5	1	0
EFNB1	ENSGALG00000036539	N	FALSE	N	I	0.217	0.353719	0.0416136	0.220706	0	0	0	0
EGFL6	ENSGALG00000016584	Y	FALSE	N	I	0.086	0.0673947	0.28698	0	0	0	0	0
EIF1AX	ENSGALG00000016410	Y	TRUE	Y	E	NA	0.393959	0	0.0755862	1	2	3	3.5
EIF2S3	ENSGALG00000016340	Y	FALSE	Y	E	0.861	0.568314	0.0040059	0.103421	0	0	0	0
ELF4		N	FALSE	N	I	0.43	0.345094	0.267722	0.166074	0	0	0	0
ELK1		N	FALSE	N	I	1	0.329464	0.166701	0.0186	0	0	0	0
EMD		N	FALSE	N	I	NA	0.481392	0.165207	0.473	0	0	0	0
ENOX2	ENSGALG00000004079	N	FALSE	N	I	0.106	0.473747	0.0762979	0.112344	0	0	0	0
ERAS		N	FALSE	N	No call	0.268	0.144778	0.215769	0.147	0	0	0	0
ERCC6L	ENSGALG00000003881	N	FALSE	N	I	0.269	0.212427	0.352622	0.0172041	0	0	0	0
ESX1		N	FALSE	N	No call	0.154	0.0370705	0.578885	0.101	0	0	0	0
F1NGI5	NA	N	FALSE	N	NA	NA	NA	NA	NA	NA	NA	NA	NA
F8	ENSGALG00000005077	N	FALSE	N	I	0.086	0.315269	0.39975	0.04925	0	0	0	0
F9	ENSGALG00000006513	N	FALSE	N	No call	0.284	0.0314596	0.202179	0.0436818	0	0	0	0
FAAH2	ENSGALG00000028084	N	FALSE	N	I	0.14	0.242143	NA	0.0004	0	0	0	0
FAM120C		N	FALSE	N	I	0.461	0.498583	0.148969	0.022	0	0	0	0
FAM122B	ENSGALG00000006108	N	FALSE	Y	I	0.211	0.442782	0.210086	0.0588519	3	1.66667	6	2.33333
FAM122C	ENSGALG00000006127	N	FALSE	N	I	0.056	0.205719	0.778065	0.0115	0	0	0	0
FAM123B	NA	N	FALSE	N	NA	NA	NA	0.270264	NA	NA	NA	NA	NA
FAM155B	ENSGALG00000041437	N	FALSE	N	I	0.223	0.0943466	0.129046	0.163533	4	2.66667	4	2.16667
FAM199X	ENSGALG00000008872	N	FALSE	N	I	NA	0.533557	0.0308568	0.196778	6	1.83333	4	1.16667
FAM3A		N	FALSE	N	I	0.213	0.601848	0.067629	0.029	0	0	0	0
FAM46D	ENSGALG00000007157	N	FALSE	N	No call	0.294	0.0338439	0.289827	0.0581	1	0.166667	0	0.166667
FAM50A		N	FALSE	N	I	0.075	0.604434	0.00643343	0.0115	0	0	0	0
FAM70A	NA	N	FALSE	N	I	0.372	NA	0.065133	NA	NA	NA	NA	NA
FANCB	ENSGALG00000016569	Y	FALSE	N	I	0.092	0.346641	0.806191	0.0429792	0	0	0	0
FATE1		N	FALSE	N	No call	NA	0.0320366	0.509	0	0	0	0	0
fdx1b	NA	N	FALSE	N	NA	NA	NA	NA	NA	NA	NA	NA	NA
FGD1		N	FALSE	N	I	0.266	0.468496	0.0810544	0.297857	0	0	0	0
FGF13	ENSGALG00000006508	N	FALSE	N	I	0.856	0.170279	0.320875	0.0654706	9	5.66667	11	5.16667
FGF16	ENSGALG00000007806	N	FALSE	N	No call	0.88	0.176347	0.02079	0.257333	8	3.16667	4	0.5
FHL1	ENSGALG00000006190	N	FALSE	N	I	0.426	0.135814	0.131345	0.0358889	0	0.166667	0	0.166667
FIGF	ENSGALG00000016558	Y	FALSE	N	I	0.108	0.116775	0.172003	0.0886667	3	0.833333	7	1.16667
FLNA		N	FALSE	N	I	NA	0.164788	0.0179547	0.123667	0	0	0	0
FMR1	ENSGALG00000009177	N	FALSE	N	I	0.49	0.417415	0.0971154	0.435767	27	15.6667	24	13.5
FMR1NB	ENSGALG00000044816	N	FALSE	N	No call	NA	0.0317947	0.632174	0	0	0	0	0
Fndc3c1	NA	N	FALSE	N	NA	NA	NA	NA	NA	NA	NA	NA	NA
FOXO4	ENSGALG00000005658	N	FALSE	N	VE	0.857	0.447667	0.174783	0.213556	0	0.666667	0	0
FOXP3		N	FALSE	N	I	0.315	0.252956	0.117053	0.0688333	0	0	0	0
FOXR2		N	FALSE	N	No call	NA	0.0322844	0.599483	0.0371053	0	0	0	0
FRMD7	ENSGALG00000023843	N	FALSE	N	VE	0.128	0.123582	0.182369	0.0483333	0	0	0	0
FRMPD3	ENSGALG00000028975	N	FALSE	N	NA	0.135	0.128727	0.110733	0.183	3	0.833333	2	1
FRMPD4	ENSGALG00000033541	Y	FALSE	N	Discordant	0.199	0.107748	0.109577	0.218938	9	7.33333	8	7.66667
FTSJ1		N	FALSE	N	I	0.057	0.58832	0.125826	0.041	0	0	0	0
FUNDC1	ENSGALG00000028187	Y	FALSE	N	E	0.151	0.469314	0.0496313	0.0208333	2	0.5	2	1
FUNDC2	ENSGALG00000029585	N	FALSE	N	I	0.03	0.507613	NA	0.0488679	0	0	0	0
G6PD		N	FALSE	N	I	0.364	0.280742	0.0725815	0.2768	0	0	0	0
GAB3	ENSGALG00000008408	N	FALSE	N	I	0.21	0.198416	0.293653	0.0514667	0	0	0	0
GABRA3	ENSGALG00000007269	N	FALSE	N	Discordant	0.037	0.120065	0.056032	0.130037	0	0.333333	0	0
GABRE	ENSGALG00000020292	N	FALSE	N	I	0.374	0.229618	0.270621	0.14481	1	0.5	1	0.333333
GABRQ		N	FALSE	N	I	0.108	0.0601066	0.267822	0.0841364	0	0	0	0
GATA1	ENSGALG00000032491	N	FALSE	N	I	0.34	0.0696477	0.139876	0.222	0	0	0	0
GDI1		N	FALSE	N	I	0.237	0.292927	0.0181782	0.251667	0	0	0	0
GDPD2	ENSGALG00000005842	N	FALSE	N	No call	0.186	0.0544127	0.271502	0.0234	0	0	0	0
GEMIN8	ENSGALG00000016574	Y	FALSE	N	E	0.081	0.511231	0.327202	0.0514231	0	0	0	0
GJB1	ENSGALG00000005541	N	FALSE	N	No call	0.784	0.136985	0.0134929	0.149333	0	0	0	0
GK	ENSGALG00000016285	Y	FALSE	N	I	NA	0.151003	NA	0.111295	0	0	0	0
GLA	ENSGALG00000004948	N	FALSE	N	I	0.079	0.459206	0.260887	0.0121304	0	0	0	0
GLOD5	ENSGALG00000025991	N	FALSE	N	No call	0.162	0.097856	0.181209	0	0	0	0	0
Gm14511	NA	Y	FALSE	N	NA	NA	NA	NA	NA	NA	NA	NA	NA
Gm364	NA	N	FALSE	N	NA	NA	NA	NA	NA	NA	NA	NA	NA
Gm4984	NA	Y	FALSE	N	NA	NA	NA	NA	NA	NA	NA	NA	NA
Gm5124	NA	Y	FALSE	N	NA	NA	NA	NA	NA	NA	NA	NA	NA
Gm5127	NA	N	FALSE	N	NA	NA	NA	NA	NA	NA	NA	NA	NA
Gm5634	NA	Y	FALSE	N	NA	NA	NA	NA	NA	NA	NA	NA	NA
Gm5635	NA	Y	FALSE	N	NA	NA	NA	NA	NA	NA	NA	NA	NA
Gm6377	NA	N	FALSE	N	NA	NA	NA	NA	NA	NA	NA	NA	NA
Gm7157	NA	Y	FALSE	N	NA	NA	NA	0.622499	NA	NA	NA	NA	NA
GNL3L	ENSGALG00000040565	N	FALSE	N	I	NA	0.454645	0.138937	0.0115946	0	0	0	0
GPC3	ENSGALG00000006087	N	FALSE	N	I	0.712	0.147862	0.0811268	0.195111	0	0	0	0
GPC4	ENSGALG00000006080	N	FALSE	N	I	0.799	0.269202	0.0626625	0.153225	10	9.5	5	2.83333
GPKOW	ENSGALG00000033573	N	FALSE	N	I	0.069	0.69537	0.275898	0.00921429	0	0	0	0
GPM6B	ENSGALG00000016575	Y	FALSE	N	E	0.88	0.146878	0.0310536	0.168667	22	12.1667	24	13.1667
GPR101		N	FALSE	N	I	0.233	0.0568464	0.255087	NA	NA	NA	NA	NA
GPR112	NA	N	FALSE	N	E	0.086	0.175422	NA	0.091	0	0	0	0
GPR119	ENSGALG00000004069	N	FALSE	N	No call	0.44	0.0756223	0.261978	0.0025	0	0	0	0
GPR143	ENSGALG00000016615	Y	FALSE	N	I	0.089	0.253538	0.193335	0.012	0	0	0	0
gpr165	NA	N	FALSE	N	NA	NA	NA	NA	NA	NA	NA	NA	NA
GPR173		N	FALSE	N	I	0.148	0.232237	0.0101502	0.146115	0	0	0	0
GPR174	ENSGALG00000004111	N	FALSE	N	VE	0.118	0.095488	0.134365	0.15925	0	0	0	0
GPR34	ENSGALG00000016227	Y	FALSE	N	I	0.26	0.307265	0.0877826	0.0204138	0	0	0	0
GPR50	ENSGALG00000009067	N	FALSE	N	No call	0.073	0.0341926	0.311047	0.175733	0	0	0	0
GPR64	NA	Y	FALSE	N	I	0.434	0.210451	0.263422	0.1635	1	0.333333	1	0.333333
GPR82	ENSGALG00000044763	Y	FALSE	N	No call	0.263	0.285925	0.285919	0.016875	0	0	0	0
GRIA3	ENSGALG00000034109	N	FALSE	N	I	0.329	0.134327	0.0461804	NA	17	9.66667	10	7.33333
GRIPAP1		N	FALSE	N	I	0.149	0.249556	0.0628415	0.081	0	0	0	0
GRPR	ENSGALG00000027960	Y	FALSE	N	VE	0.347	0.130149	0.111247	0.0163125	0	0	0	0
GSPT2	ENSGALG00000039500	N	FALSE	N	I	NA	0.309115	0.152538	0.276571	5	2.16667	10	7.16667
GUCY2F	ENSGALG00000000808	N	FALSE	N	VE	0.149	0.0597125	0.164062	NA	NA	NA	0	0
GYG2	ENSGALG00000016655	Y	FALSE	N	E	0.435	0.156117	NA	0.0464643	0	0	0	0
HAUS7		N	FALSE	N	I	NA	0.154398	NA	0	0	0	0	0
HCCS	ENSGALG00000005571	Y	FALSE	N	I	NA	0.538309	0.152608	0.0321333	0	0.166667	0	0
HCFC1		N	FALSE	Y	VE	0.304	0.552241	0.0499755	0.150636	0	0	0	0
HDAC6		N	FALSE	N	I	NA	0.36652	0.28517	0.0245	0	0	0	0
HDAC8	ENSGALG00000004825	N	FALSE	N	I	0.147	0.499292	0.0537257	0.0271875	0	0	0	0
HDHD1A	NA	Y	FALSE	N	NA	0.062	NA	0.211512	NA	NA	NA	NA	NA
HDX	ENSGALG00000007041	N	FALSE	N	I	0.351	0.343533	0.138999	0.126	0	0.166667	0	0
HEPH	ENSGALG00000037410	N	FALSE	N	I	0.18	0.199067	0.158981	0.0141429	0	0	0	0
HMGB3	ENSGALG00000009071	N	FALSE	Y	I	0.911	0.249821	NA	0.201031	12	8.83333	10	7.5
HMGN5	ENSGALG00000007131	N	FALSE	N	Discordant	NA	0.118274	0.29035	0.0239565	0	1.83333	2	2.66667
HPRT1	ENSGALG00000006098	N	FALSE	N	I	0.667	0.299781	0.0549165	0.089125	2	0.833333	2	1
HS6ST2	ENSGALG00000034250	N	FALSE	N	Discordant	0.38	0.165361	0.197283	0.06425	4	1.5	2	2.66667
HSD17B10	ENSGALG00000040068	N	FALSE	N	I	NA	0.529558	0.155199	0	0	0	0	0
hsf3	NA	N	FALSE	N	NA	NA	NA	NA	NA	NA	NA	NA	NA
HTATSF1	ENSGALG00000006410	N	FALSE	N	I	0.382	0.231372	0.170269	0.0796667	1	0.166667	1	0
HTR2C	ENSGALG00000005853	N	FALSE	N	E	0.303	0.0806353	0.0919328	0.162375	9	1.66667	5	1
HUWE1	ENSGALG00000032644	N	FALSE	Y	I	0.816	0.569195	0.0361446	0.0848571	0	0	0	0
IDH3G	ENSGALG00000029663	N	FALSE	N	I	0.084	0.557438	0.035518	0.0475	0	0	0	0
IDS	ENSGALG00000009154	N	FALSE	N	I	0.191	0.226332	0.140548	0.08492	0	0	0	0
IDS	ENSGALG00000009154	N	FALSE	N	I	0.191	0.226332	0.140548	0.08492	0	0	0	0
IDS	ENSGALG00000009154	N	FALSE	N	I	0.191	0.226332	0.140548	0.08492	0	0	0	0
IDS	ENSGALG00000009154	N	FALSE	N	I	0.191	0.226332	0.140548	0.08492	0	0	0	0
IGBP1		N	FALSE	N	I	0.119	0.616321	0.333441	0.053	0	0	0	0
IKBKG		N	FALSE	N	I	0.372	0.407561	0.0592964	0.0288182	0	0	0	0
IL13RA1	ENSGALG00000044480	N	FALSE	N	I	0.386	0.481623	0.321398	0.0746857	0	0	0	0
IL13RA2	ENSGALG00000020316	N	FALSE	N	No call	0.047	0.0804969	0.380807	NA	0	NA	0	0
IL1RAPL1	ENSGALG00000016288	Y	FALSE	N	Discordant	0.705	0.232117	0.0186863	0.238661	14	8.5	13	8
IL1RAPL2	ENSGALG00000008888	N	FALSE	N	Discordant	0.243	0.217278	0.0864759	0.737	1	0.166667	1	0.166667
IL2RG	ENSGALG00000005638	N	FALSE	N	No call	0.144	0.072315	0.411942	0	0	0	0	0
IQSEC2		N	FALSE	N	E	0.65	0.204007	0.0150593	0.167944	0	0	0	0
IRAK1		N	FALSE	N	I	NA	0.526655	0.190961	0.05955	0	0	0	0
IRS4	ENSGALG00000008107	N	FALSE	N	I	0.053	NA	0.355097	0.130098	0	0	0	0
ITGB1BP2	ENSGALG00000005493	N	FALSE	N	No call	0.131	0.0857211	0.152964	0.2145	0	0	0	0
ITIH5L	NA	N	FALSE	N	NA	0.068	NA	NA	NA	NA	NA	NA	NA
ITM2A	ENSGALG00000004107	N	FALSE	N	Discordant	0.221	0.483531	0.0453446	0.1236	0	0.166667	0	0.166667
KAL1	NA	Y	FALSE	N	E	0.432	0.297917	NA	0.0693871	2	2.16667	1	4.16667
KCND1		N	FALSE	N	I	0.386	0.150658	0.0369162	0.249682	0	0	0	0
KCNE1L	NA	N	FALSE	N	I	0.192	0.151938	0.111323	0.0941667	0	0	0	0
KCTD12	ENSGALG00000033816	N	FALSE	N	NA	NA	0.319318	NA	0.130571	4	1.16667	2	0.833333
KDM5C		N	TRUE	Y	E	0.197	0.461527	0.0625982	0.193062	0	0	0	0
KDM6A	ENSGALG00000016217	Y	TRUE	Y	E	0.982	0.3472	0.0911425	0.34315	24	16.5	26	19.8333
KDRL	NA	N	FALSE	N	NA	NA	NA	NA	NA	NA	NA	NA	NA
KIAA2022	ENSGALG00000007755	N	FALSE	N	I	0.456	0.241365	0.204218	0.283868	21	10.3333	18	11.6667
KIF4B	ENSGALG00000004195	N	FALSE	N	NA	NA	0.0348574	NA	0.00745455	0	0	0	0
KLF8	ENSGALG00000044078	N	FALSE	N	I	0.109	0.281085	0.216787	0.124614	1	0.833333	1	0.333333
KLHL13	ENSGALG00000005982	N	FALSE	N	I	0.218	0.276792	0.0881158	0.238833	11	3.5	4	1.16667
KLHL15	ENSGALG00000016345	Y	FALSE	N	I	0.508	0.232042	0.00682369	0.33493	1	1.33333	1	1.66667
KLHL34	ENSGALG00000016388	Y	FALSE	N	No call	0.496	0.078733	0.103659	0	0	0	0	0
KLHL4	ENSGALG00000006877	N	FALSE	N	No call	0.346	0.0978412	0.134698	0.02715	0	0.166667	0	0.166667
L1CAM		N	FALSE	N	E	0.345	0.0990474	0.0890658	0.1802	0	0	0	0
LAMP2	ENSGALG00000008572	N	FALSE	N	I	0.433	0.327251	0.516768	0.0992059	0	1.5	0	3.5
LANCL3	ENSGALG00000016265	Y	FALSE	N	I	0.057	0.289754	0.0381283	0.113082	7	1.16667	8	2.5
LAS1L	ENSGALG00000043447	N	FALSE	N	I	0.091	0.250625	0.33168	0.0543529	0	0	0	0
LHFPL1		N	FALSE	N	Discordant	0.372	0.181597	0.0764052	0.0122222	0	0	0	0
LOC100129095	NA	N	FALSE	N	NA	NA	NA	0.0314301	NA	NA	NA	NA	NA
LOC422276	NA	N	FALSE	N	NA	NA	NA	NA	NA	NA	NA	NA	NA
LOC729275	NA	N	FALSE	N	NA	NA	NA	NA	NA	NA	NA	NA	NA
LOC771411	NA	N	FALSE	N	NA	NA	NA	NA	NA	NA	NA	NA	NA
LOC772071	NA	N	FALSE	N	NA	NA	NA	NA	NA	NA	NA	NA	NA
LONRF3	ENSGALG00000008860	N	FALSE	N	I	0.438	0.185407	0.228888	0.312904	9	2.66667	0	0.5
LPAR4	ENSGALG00000004121	N	FALSE	N	No call	0.644	0.365617	0.0173797	0.1185	0	0	0	0
LRCH2	ENSGALG00000005882	N	FALSE	N	Discordant	0.132	0.334599	0.0865996	0.216185	13	1.66667	6	1.66667
MAGEA1	ENSGALG00000040480	N	FALSE	N	No call	0.133	0.0326168	0.589736	0.00688889	0	0	0	0
MAGEB17	ENSGALG00000040480	Y	FALSE	N	NA	NA	0.100502	NA	0.00333333	0	NA	0	0
MAGEB5	ENSGALG00000040480	Y	FALSE	N	NA	0.02	0.0318527	0.480378	0	0	0	0	0
MAGEB6	ENSGALG00000040480	Y	FALSE	N	No call	0.057	0.0316518	0.437858	0	0	0	0	0
MAGED2	ENSGALG00000040480	N	FALSE	N	I	0.444	0.388229	0.247457	0.042	0	0	0	0
MAGEE1	ENSGALG00000040480	N	FALSE	N	Discordant	0.129	0.209716	0.39531	0.1025	0	0	0	0
MAGEH1		N	FALSE	N	I	0.179	0.352035	0.0664047	0.0042	0	0	0	0
MAGIX	ENSGALG00000033870	N	FALSE	N	I	0.031	0.162265	0.448827	0.0535	0	0	0	0
MAGT1	ENSGALG00000007861	N	FALSE	N	I	0.104	0.411875	0.156352	0.138139	0	0	0	0
MAMLD1	ENSGALG00000009098	N	FALSE	N	I	0.647	0.210774	0.385404	0.0248125	3	1	8	3.33333
MAP3K15	ENSGALG00000016426	Y	FALSE	N	I	0.092	0.0440763	0.164109	0.00606667	0	0	0	0
MAP7D2	ENSGALG00000016415	Y	FALSE	N	Discordant	0.223	0.176052	0.237858	0.0674286	2	2	3	2.33333
MAP7D3	ENSGALG00000041423	N	FALSE	N	I	0.048	0.280382	0.242467	0.084	1	0.833333	3	0.666667
MBNL3	ENSGALG00000032045	N	FALSE	N	I	0.15	0.177138	0.261704	0.274542	25	13	32	19.1667
MBTPS2	ENSGALG00000016382	Y	FALSE	N	I	0.203	0.446661	0.0403727	0.2068	0	0.166667	0	0.166667
MCART6	NA	N	FALSE	N	I	0.23	NA	0.124115	NA	NA	NA	NA	NA
MCF2	ENSGALG00000006562	N	FALSE	N	I	0.162	0.155499	0.248092	0.225667	0	0	0	0
MCTS1	ENSGALG00000008517	N	FALSE	N	I	0.551	0.587466	NA	0.0733385	0	0.166667	0	0
MECP2		N	FALSE	Y	I	0.359	0.34608	0.0684126	0.138595	0	0	0	0
MED12	ENSGALG00000036322	N	FALSE	N	I	0.414	0.480181	0.0356377	0.107	0	0	0	0
MED14	ENSGALG00000016238	Y	FALSE	N	VE	0.612	0.484291	0.0438312	0.275469	12	2.66667	13	3
MID1IP1	ENSGALG00000041078	Y	FALSE	N	I	0.289	0.359915	0.0902168	0.266353	0	0	0	0
MMGT1	ENSGALG00000027199	N	FALSE	N	I	NA	0.473129	0.433813	0.158909	4	1.16667	3	0.333333
MORC4		N	FALSE	N	I	0.13	0.287518	0.282073	0.0626	0	0	0	0
MOSPD1	ENSGALG00000006132	N	FALSE	N	I	0.139	0.448275	0.0421836	0.179478	4	0.666667	3	0.5
MOSPD2	ENSGALG00000016568	Y	FALSE	N	I	0.221	0.217683	0.0851667	0.153065	4	0.666667	4	0.833333
MPP1	ENSGALG00000005071	N	FALSE	N	I	0.9	0.238406	0.0872852	0.255	0	0	0	0
MSL3	ENSGALG00000041433	Y	FALSE	N	Discordant	NA	0.323445	0.140116	0.0191111	0	0	0	0
MSN	ENSGALG00000039615	N*	FALSE	N	I	0.852	0.339316	0.0127199	0.222654	3	0.5	5	0.166667
MST4	NA	N	FALSE	N	I	NA	0.316434	0.0175947	0.190917	5	4.16667	8	5.66667
MTCP1	ENSGALG00000038681	N	FALSE	N	I	0.172	0.18237	NA	0.0616667	0	0.333333	0	0.166667
MTM1	ENSGALG00000009096	N	FALSE	N	I	0.255	0.536326	NA	0.0685556	3	2.33333	1	2
MTMR1	ENSGALG00000009085	N	FALSE	N	I	0.31	0.41678	0.0826011	0.0619118	0	0.333333	0	0.5
MTMR8	ENSGALG00000007590	N	FALSE	N	I	0.12	0.299087	NA	0	0	0	0	0
MXRA5	ENSGALG00000016635	Y	FALSE	Y	E	0.211	0.223404	NA	0.0198421	0	1.66667	4	1
NAA10	ENSGALG00000041676	N	FALSE	N	VE	NA	0.633792	0.0471494	0.0204286	0	0	0	0
NAP1L3		N	FALSE	N	E	0.252	0.174932	0.21476	0.14475	7	3	15	6.83333
NCBP2L	ENSGALG00000005753	N	FALSE	N	NA	0.064	0.0783852	NA	NA	NA	NA	NA	NA
NDP	ENSGALG00000016222	Y	FALSE	N	No call	0.353	0.173819	0.0633592	0.0941875	0	0	0	0
NDUFA1	ENSGALG00000008613	N	FALSE	N	I	0.001	0.350188	0.115838	0	0	0	0	0
NDUFB11		Y	FALSE	N	I	0.09	0.566229	0.481953	0.006	0	NA	0	0
NHS	ENSGALG00000016543	Y	FALSE	N	VE	0.028	0.287603	0.204593	0.26	26	14.1667	21	16.6667
NHSL2	ENSGALG00000028506	N	FALSE	N	Discordant	0.152	0.330652	0.269643	0.119756	0	0	0	0
NKAP	ENSGALG00000020262	N	FALSE	N	I	0.35	0.690344	0.113871	0.1185	1	0	1	0.166667
NKRF	ENSGALG00000008645	N	FALSE	N	I	0.401	0.381059	0.0875638	0.113622	0	0.333333	0	0.5
NLGN3	ENSGALG00000005553	N	FALSE	N	I	0.442	0.288046	0.0147978	0.1767	0	0	0	0
NLGN4X	ENSGALG00000016628	Y	TRUE	Y	E	0.725	0.257299	NA	0.142621	8	7.66667	16	14.3333
NONO	ENSGALG00000005507	N	FALSE	N	I	0.842	0.548192	0.0118308	0.0511111	6	0.333333	2	0.166667
NOX1	ENSGALG00000006707	N	FALSE	N	No call	0.097	0.0573501	0.270293	0.0687143	0	0	0	0
NR0B1	ENSGALG00000016287	Y	FALSE	N	I	0.648	0.0643562	0.241152	0.0125714	1	0.666667	1	1
NRK	ENSGALG00000008970	N	FALSE	N	I	0.258	0.078508	0.400384	0.266371	0	0	0	0
NSDHL	ENSGALG00000007493	N	FALSE	N	I	0.073	0.373308	0.138619	0.0535	0	0	0	0
NUP62CL	ENSGALG00000004856	N	FALSE	N	I	0.056	0.105105	1.0684	0.0568298	0	0	0	0
NXT2	ENSGALG00000008092	N	FALSE	N	I	0.003	0.178003	0.224204	0.286034	0	0	0	0
NYX	ENSGALG00000016228	Y	FALSE	N	I	0.183	0.041822	0.0773416	0.013125	0	0	0	0
OCRL	ENSGALG00000003920	N	FALSE	N	I	0.289	0.402818	0.097943	0.120528	0	0.166667	0	0.166667
ODZ1	NA	N	FALSE	N	Discordant	0.655	NA	0.0381106	NA	NA	NA	NA	NA
OFD1	ENSGALG00000016576	Y	FALSE	Y	E	0.106	0.40657	0.387133	NA	0	0	0	0
OGT	ENSGALG00000005425	N	FALSE	N	I	0.313	0.437241	0.00487937	0.350538	7	2.5	5	0.833333
OPHN1	ENSGALG00000029652	N	FALSE	N	I	0.126	0.422906	0.0847179	0.063463	0	0	0	0
OR13H1		N	FALSE	N	No call	0.102	NA	0.249902	NA	NA	NA	0	0
OTC	ENSGALG00000016254	Y	FALSE	N	I	0.182	0.0404096	0.0979644	0.075	0	0	0	0.166667
OTUD5	ENSGALG00000029850	N	FALSE	Y	I	0.299	0.539257	0.0202878	0.161692	0	0	0	0
P2RY4	ENSGALG00000004346	N	FALSE	N	I	0.082	0.211396	0.213717	0.049	0	0	0	0
PAK3	ENSGALG00000008058	N	FALSE	N	I	0.42	0.222875	0.0200419	0.208458	12	6.5	5	1.16667
PASD1		N	FALSE	N	No call	0.052	0.0318043	NA	0.0355714	0	0	0	0
PCDH11X	ENSGALG00000006851	N	FALSE	N	Discordant	0.093	0.14211	0.223245	0.0155333	2	2.66667	2	2.16667
PCDH19	ENSGALG00000006822	N	FALSE	N	I	0.309	0.181473	0.0265502	0.137175	9	5	3	0.5
PCSK1N		N	FALSE	N	I	NA	0.0785606	0.113578	0.053	0	NA	0	0
PCYT1B	ENSGALG00000016318	Y	FALSE	N	I	0.166	0.293858	0.0270483	0.190286	1	0	0	0
PDHA1	ENSGALG00000016430	Y	FALSE	N	I	0.28	0.298807	0.0179342	0.0537083	0	0.5	2	1.5
PDK3	ENSGALG00000016323	Y	FALSE	N	I	0.064	0.215582	0.028966	0.126467	0	0	0	0
PDZD11	ENSGALG00000004198	N*	FALSE	N	I	0.081	0.51431	0.0420984	0.0434	0	0	0	0
PDZD4		N	FALSE	N	Discordant	0.364	0.163517	0.052773	0.203818	0	0	0	0
PFKFB1	ENSGALG00000032385	N	FALSE	N	Discordant	0.375	0.141156	0.0891547	0.0328	0	0	0	0
PGK1	ENSGALG00000007936	N	FALSE	N	I	0.761	0.56376	NA	0.0761053	0	0.5	1	0.833333
PGRMC1	ENSGALG00000020260	N	FALSE	N	I	0.189	0.428365	0.0490244	0.0976923	0	0	0	0
PHEX	ENSGALG00000016375	Y	FALSE	N	VE	0.525	0.131341	0.0551031	0.0647941	0	0	0	0
PHF16	NA	Y	FALSE	N	I	0.377	NA	0.238361	0.116913	5	2.66667	8	5
PHF6	ENSGALG00000006094	N	FALSE	Y	I	0.69	0.406577	0.0269182	0.262378	19	9.66667	25	12
PHF8		N	FALSE	N	I	0.434	0.21635	0.32974	0.10245	0	0	0	0
PIGA	ENSGALG00000016559	Y	FALSE	N	I	0.115	0.329283	0.194273	0.191032	0	0	0	0
PIM2		N	FALSE	N	I	0.696	0.106553	0.131545	0.3076	0	0	0	0
PIN4	ENSGALG00000003878	N	FALSE	N	Discordant	0.205	0.616817	0.0690838	0.0471429	0	0.833333	0	0.666667
PIR		Y	FALSE	N	Discordant	0.117	0.326302	0.0527534	0	0	0	0	0
PLP1	ENSGALG00000000112	N	FALSE	N	I	0.926	0.0779193	0	0.0856316	3	2.16667	2	1.66667
PLP2		N	FALSE	N	I	0.286	0.355874	0.32072	0.211667	0	0	0	0
PLS3	ENSGALG00000005930	N	FALSE	N	VE	0.968	0.16002	0.00833495	0.078125	0	1.66667	1	2.33333
PLXNA3		N	FALSE	N	I	0.114	0.245965	0.0310915	0.0949038	0	0	0	0
PLXNB3		N	FALSE	N	Discordant	0.157	0.238671	0.109451	0	1	1.66667	1	1
PNCK		N	FALSE	N	I	0.113	0.257348	0.0299919	0.08575	0	0	0	0
PNMA3		N	FALSE	N	Discordant	0.165	0.163065	0.275551	0.0226364	0	0	0	0
PNMA5		N	FALSE	N	I	0.064	0.0963276	0.400713	0.00892857	0	0	0	0
PNPLA4	ENSGALG00000016618	Y	FALSE	N	E	0.131	0.614393	NA	0.0315	0	0	0	0
POF1B	ENSGALG00000006919	N	FALSE	N	VE	0.117	0.0546399	0.131816	0.00527273	0	0	0	0
POLA1	ENSGALG00000016312	Y	FALSE	N	I	0.996	0.44482	0.209243	0.0628333	1	0.333333	6	2.66667
PORCN	ENSGALG00000031419	N	FALSE	N	I	0.248	0.206256	0.0477405	0.049	0	0	0	0
POU3F4	ENSGALG00000029329	N	FALSE	N	I	0.733	0.0635797	0.016339	NA	0	0	0	0
PPEF1	ENSGALG00000016522	Y	FALSE	N	VE	0.158	0.0667032	0.485083	0.0018	0	0	0	0
PPP1R3F		N	FALSE	N	I	0.311	0.279206	0.254969	0.1685	0	0	0	0
PQBP1		N	FALSE	N	I	0.104	0.502928	0.0908615	NA	NA	NA	0	0
PRAF2		N	FALSE	N	I	NA	0.473856	NA	0.0720667	0	0	0	0
PRDX4	ENSGALG00000016357	Y	FALSE	N	I	0.176	0.324854	0.144052	0	0	0	0	0
PRICKLE3		N	FALSE	N	I	0.156	0.41283	0.0923053	0.000125	0	0	0	0
PRKX	ENSGALG00000042759	Y	TRUE	Y	E	NA	0.165632	0.0745884	0.0683725	5	1.5	4	4.66667
PRRG1	ENSGALG00000016266	Y	FALSE	N	I	0.191	0.1616	0.0992041	0.143574	3	0.166667	4	0.166667
PRRG3	ENSGALG00000027977	N	FALSE	N	I	0.224	0.123155	0.0400828	0.0298723	2	1.33333	0	0
PSMD10	ENSGALG00000008287	N	FALSE	N	I	0.983	0.384278	0.108069	0.021	2	0.5	0	0.5
PTCHD1	ENSGALG00000016358	Y	FALSE	N	Discordant	0.442	0.085141	0.0435393	0.176247	2	0.5	4	1
RAB33A	ENSGALG00000024049	N	FALSE	N	I	0.095	0.217626	0.0196226	0.122	0	0	0	0
RAB39B	ENSGALG00000040784	N	FALSE	N	I	0.432	0.20393	0.0251142	0.219172	4	1.66667	4	1.66667
RAB41		N	FALSE	N	I	0.049	0.136493	NA	0.0264545	0	0	0	0
RAI2	ENSGALG00000016538	Y	FALSE	N	I	NA	0.320683	0.116561	0.2935	3	1.66667	7	2.83333
RAP2C	ENSGALG00000006061	N	FALSE	N	I	0.537	0.60542	0	0.431185	32	17.5	33	15.3333
RBBP7	ENSGALG00000016546	Y	FALSE	N	E	0.308	0.261876	0.0245692	0.21275	4	1.83333	2	2.83333
RBM10		N	FALSE	Y	I	0.142	0.390184	0.0453166	0.1175	0	0	0	0
RBM3		N	FALSE	N	I	0.278	0.385729	0.0297608	0.0530938	0	0	0	0
RBM41	ENSGALG00000004832	N	FALSE	N	I	0.108	0.358424	0.210886	0.0537632	0	0	0	0
RBMX	ENSGALG00000006457	N	TRUE	Y	I	0.234	0.516447	NA	0.14125	5	6.83333	3	6.66667
RBMX2		N	FALSE	N	I	0.055	0.614603	0.190533	0.0279286	0	0	0	0
RENBP		N	FALSE	N	Discordant	NA	0.163901	0.178714	NA	0	0	0	0
REPS2	ENSGALG00000016545	Y	FALSE	N	Discordant	0.148	0.277515	0.177551	0.189286	0	0	0	0.166667
RGN	ENSGALG00000016724	Y	FALSE	N	I	0.104	0.10487	0.138237	0.061	0	0	0	0
RHOG	ENSGALG00000026995	N	FALSE	N	NA	NA	0.120104	NA	0.224143	0	0	0	0
RIBC1		N	FALSE	N	Discordant	0.076	0.0598347	0.33196	0	0	0	0	0
RIPPLY1		N	FALSE	N	I	0.313	0.118321	0.350985	0.0262	0	0	0	0
RLIM	ENSGALG00000007750	N	FALSE	N	I	NA	0.596614	0.106161	0.253971	18	6.66667	9	7.5
RNF113A	ENSGALG00000000538	N	FALSE	N	I	NA	NA	0.129941	0	0	NA	0	NA
RNF128	ENSGALG00000041977	N	FALSE	N	I	0.527	0.201477	0.0928345	0.218417	4	0.5	4	0.333333
RP2	ENSGALG00000016728	Y	FALSE	N	I	0.127	0.454386	0.111382	0.0570667	0	0	0	0
RPGR	ENSGALG00000036284	Y	FALSE	N	I	0.529	0.304394	0.471165	0.0875714	0	0	0	0
RPL10	ENSGALG00000039470	N	FALSE	Y	I	0.254	0.548544	NA	0.00805	0	0	0	0
RPL36A	ENSGALG00000004952	N	FALSE	N	I	0.259	0.46651	NA	0	0	0	0	0
RPL39	ENSGALG00000008620	N	FALSE	N	I	0.601	0.440761	0	0	0	0	0	0
RPS4X	ENSGALG00000004831	N	TRUE	Y	E	0.904	0.467857	0	0	0	0	0	0
RPS6KA3	ENSGALG00000016406	Y	FALSE	N	I	0.681	0.456499	0.00215363	0.316529	13	7.5	16	8.5
RPS6KA6	ENSGALG00000007097	N	FALSE	N	I	0.164	0.257189	0.13605	0.218368	9	2.5	14	4.83333
RRAGB	ENSGALG00000041226	N	FALSE	N	I	0.166	0.516135	0.0302521	0.0984	0	0.333333	0	0.166667
RS1	ENSGALG00000016523	Y	FALSE	N	Discordant	0.197	0.102737	0.0289671	0.0835455	0	0	0	0
S100G		Y	FALSE	N	E	0.066	0.13428	0.0858302	0.0005	0	0	0	0
SAGE1	ENSGALG00000006157	N	FALSE	N	No call	0.365	0.0374263	NA	0.000666667	0	0	0	0
SASH3	ENSGALG00000032530	N	FALSE	N	I	0.301	0.0988042	0.0537476	0.112687	0	0	0	0
SAT1	ENSGALG00000016348	Y	FALSE	N	I	0.06	0.326581	0.0453187	0.254667	2	3.83333	3	4
SATL1		N	FALSE	N	I	0.051	0.578054	0.566402	NA	0	0	0	0
2017-09-06	ENSGALG00000008633	N	FALSE	N	I	0.388	0.24901	0.0425968	0.0635588	0	0.333333	0	0
SH2D1A	ENSGALG00000008447	N	FALSE	N	VE	0.394	0.1177	0.148944	0.0373889	0	0	0	0
SH3BGRL	ENSGALG00000007128	N	FALSE	N	I	0.658	0.32041	0.0804911	0.0454545	0	0	0	0
SH3KBP1	ENSGALG00000016420	Y	FALSE	N	I	0.793	0.433109	0.0830099	0.333273	9	6	8	6.5
Siah1b	NA	Y	FALSE	N	NA	NA	NA	NA	NA	NA	NA	NA	NA
SLC10A3		N	FALSE	N	I	0.242	0.455363	0.119893	0.308889	0	0	0	0
SLC16A2	ENSGALG00000007748	N	FALSE	N	I	0.125	0.255496	0.0709722	0.20085	0	0	0	0
SLC25A14	ENSGALG00000004063	N	FALSE	N	I	0.507	0.352533	0.0226297	0.031	0	0	0	0
SLC25A43	ENSGALG00000008682	N	FALSE	N	I	0.062	0.345577	0.184329	0.0114091	0	1	0	0.833333
SLC25A5	ENSGALG00000008675	N	FALSE	N	I	0.306	0.363502	0.0265748	0.0362857	2	0	1	0
SLC35A2		N	FALSE	N	I	0.179	0.546966	0.0555095	0.2063	0	0	0	0
SLC38A5		N	FALSE	N	I	0.066	0.157401	0.137116	0.095	0	0	0	0
SLC51A	ENSGALG00000007478	Y	FALSE	N	NA	NA	0.104706	NA	0.133667	0	0	0	0
SLC6A14	ENSGALG00000005957	N	FALSE	N	No call	0.258	0.0505222	0.131208	0.0432286	0	0	0	0
SLC6A8		N	FALSE	N	No call	0.415	0.564634	0.0108696	0.240375	0	0	0	0
SLC7A3	ENSGALG00000033002	N	FALSE	N	I	0.365	0.117314	0.273538	0.061	0	0	0	0
SLITRK4	ENSGALG00000007242	N	FALSE	N	I	0.495	0.16051	0.0312962	0.143766	7	2.16667	4	2.66667
SMARCA1	ENSGALG00000008431	N	FALSE	N	I	0.99	0.310546	0.0433548	0.186833	4	5.16667	1	1
SMC1A	ENSGALG00000041777	N	FALSE	N	E	0.965	0.40748	0.00158121	0.114917	0	0	0	0
SMPX	ENSGALG00000019157	Y	FALSE	N	I	0.259	0.0895946	0.150548	0.046	0	0	0	0
SMS	ENSGALG00000016379	Y	FALSE	N	I	0.466	0.427107	0.0525409	0.128533	8	1.16667	9	2.83333
SNX12	ENSGALG00000005659	N	FALSE	N	I	0.131	0.666506	0.0263158	0.272192	3	0.833333	1	0.5
SOX3		N	TRUE	Y	I	0.98	0.12441	0.0609262	0.0343333	0	0	0	0
SPIN2A		N	FALSE	N	I	0.241	0.22462	NA	0.0284706	0	0.833333	2	3.16667
SPIN3		N	FALSE	N	I	0.162	0.216535	NA	0.0854	1	0.5	0	1.33333
SRPK3	ENSGALG00000006544	N	FALSE	N	I	0.184	0.126469	0.0303524	0.0065	0	0	0	0
SRPX	ENSGALG00000043100	Y	FALSE	N	I	0.636	0.216404	0.0822902	0.004125	0	0.333333	0	1.16667
SRPX2	ENSGALG00000006796	N	FALSE	N	VE	0.252	0.254459	0.0839416	0.0436481	0	0	0	0
SSR4	ENSGALG00000032485	N	FALSE	N	I	NA	0.312002	0.0277391	0	0	NA	0	0
STAG2	ENSGALG00000008482	N	FALSE	N	I	0.602	0.579357	0.0129408	0.503062	22	20	24	20.8333
STARD8	ENSGALG00000032419	N	FALSE	N	I	0.191	0.244885	0.133671	0.11675	1	0.166667	0	0
STS	ENSGALG00000016622	Y	FALSE	N	E	0.213	0.363793	NA	0.0194211	0	0	0	0
SUV39H1	ENSGALG00000031839	N	FALSE	N	I	0.585	0.484982	0.0326166	0.220125	2	1.5	1	1.33333
SYAP1	ENSGALG00000016548	Y	FALSE	N	E	0.964	0.459842	0.139197	0.106231	0	0	0	0
SYN1	ENSGALG00000004955	N	FALSE	N	I	0.598	0.115272	0.0558517	0.178444	0	0	0	0
SYP		N	FALSE	N	I	0.346	0.142488	0.0432	0.0676364	0	0	0	0
SYTL4	ENSGALG00000006786	N	FALSE	N	I	0.246	0.301385	0.142983	0.0916111	4	1.5	2	1.5
SYTL5	ENSGALG00000016258	Y	FALSE	N	I	0.191	0.156751	0.192496	0.0550833	0	0	0	0
TAB3	ENSGALG00000016284	Y	FALSE	N	I	NA	0.376447	0.0917819	0.184182	13	5.33333	20	6.5
TAF1	ENSGALG00000005464	N	FALSE	N	I	0.692	0.571391	0.0564557	0.0921538	0	0	0	0
TAF7L		N	FALSE	N	E	0.039	0.0372692	0.546684	0.109833	0	0	0	0
TAF9B	ENSGALG00000004187	N	FALSE	N	I	0.631	0.554557	0.19142	0.179429	0	0	0	0
TAGAP	ENSGALG00000013747	N	FALSE	N	NA	NA	0.115516	NA	0.218556	1	0	1	0
TAZ	ENSGALG00000033185	N	FALSE	N	I	0.26	0.369404	0.0242582	0.1628	0	0	0	0
TBC1D25	ENSGALG00000037601	N	FALSE	N	I	0.413	0.464239	0.0592716	0.159185	0	0	0	0
TBC1D8B	ENSGALG00000009040	N	FALSE	N	I	0.189	0.19722	0.119678	0.0759	0	0	0	0
TBL1X	ENSGALG00000040006	Y	TRUE	Y	Discordant	0.369	0.414945	0.0380544	0.205639	17	11.6667	17	15.6667
TBX22	ENSGALG00000004093	N	FALSE	N	I	0.075	0.0468309	0.415876	0.0333	0	0	0	0
TCEANC	ENSGALG00000016581	Y	FALSE	N	E	NA	0.348647	0.395769	0.04515	0	0	0	0
TEX11	ENSGALG00000005775	N	FALSE	N	No call	0.104	0.0431308	0.878127	0	0	0	0	0
TEX28		N	FALSE	N	No call	NA	0.0320077	0.390541	0.062	0	0	0	0
TFE3		N	FALSE	N	I	0.622	0.57163	0.0450602	0.114263	0	0	0	0
THOC2	ENSGALG00000008507	N	FALSE	Y	I	0.413	0.544652	0.0368472	0.381125	11	4.33333	11	5.5
TIMM17B		N	FALSE	N	I	0.17	0.65713	0.0544617	0.459333	0	0	0	0
TIMM8A	ENSGALG00000004963	N	FALSE	N	I	0.292	0.679075	NA	0.0909348	0	0	0	0
TIMP1		N	FALSE	N	VE	0.447	0.237638	0.211338	0.159	0	0	0	0
TKTL1		N	FALSE	N	Discordant	0.158	0.0340582	0.368441	0.149333	0	0	0	0
TLR7	ENSGALG00000016590	Y	FALSE	N	I	0.111	0.218744	0.234282	0.0153462	0	0	0	0
TMEM164	ENSGALG00000008076	N	FALSE	N	I	0.327	0.450595	0.229541	0.123688	0	0	0	0
TMEM185A	ENSGALG00000009139	N	FALSE	N	I	NA	0.547436	0.00763359	0.025	1	0.5	1	0.5
TMEM187		N	FALSE	N	VE	NA	0.559497	NA	0.0025	0	0	0	0
TMEM27	ENSGALG00000029168	Y	FALSE	N	Discordant	0.824	0.133713	0.193366	0.0578	0	0	0	0
TMEM31		N	FALSE	N	No call	NA	0.034168	NA	NA	NA	NA	NA	NA
TMEM35	ENSGALG00000005041	N	FALSE	N	I	0.518	0.169252	0.0490398	0.067875	0	0.166667	0	0.166667
TMEM47	ENSGALG00000027198	Y	FALSE	N	I	0.327	0.18387	0.0181882	0.108917	9	9.5	6	6.83333
TMLHE	ENSGALG00000007443	N	FALSE	N	I	0.168	0.588884	0.154315	0.0237143	0	0	0	0
TMSB4X	ENSGALG00000026383	Y	TRUE	Y	No call	0.396	0.376664	0	0.463375	12	4.83333	11	5.5
TNMD	ENSGALG00000006821	N	FALSE	N	No call	0.423	0.109342	0.0461087	0.0741667	0	0	0	0
TRAIL-Like	NA	N	FALSE	N	NA	NA	NA	NA	NA	NA	NA	NA	NA
TRAPPC2	ENSGALG00000016578	Y	FALSE	N	E	NA	0.323907	0.0270506	0.02055	0	0	0	0
TREX2		N	FALSE	N	I	NA	0.0965546	0.210686	NA	NA	NA	NA	NA
TRMT12	ENSGALG00000006773	N	FALSE	N	NA	NA	0.52053	NA	0.0235	0	0	0	0
TRMT2B	ENSGALG00000034383	N	FALSE	N	I	NA	0.506727	0.377921	0.0426111	0	0	0	0
TRO	ENSGALG00000040480	N	FALSE	N	I	NA	0.239419	0.346254	0.076	0	0	0	0
TRPC5	ENSGALG00000007972	N	FALSE	N	VE	0.125	0.127165	0.0336583	0.0832308	0	0.666667	0	0
TSC22D3	ENSGALG00000027069	N	FALSE	N	I	0.248	0.229662	0.0665376	0.2393	0	0.666667	0	0.833333
TSPAN6	ENSGALG00000006808	N	FALSE	N	I	0.063	0.242906	0.0743294	0.0673077	0	0	0	0
TSPAN7	ENSGALG00000016251	Y	FALSE	N	I	0.24	0.222903	0.0252905	0.0176	7	1.5	7	1.83333
TSPYL2	ENSGALG00000034472	N	TRUE	Y	I	0.114	0.32156	0.243289	0.54475	0	0	0	0
TSR2		N	FALSE	N	I	0.099	0.374367	0.15274	0.0671333	0	0	0	0
TXLNG	ENSGALG00000016547	Y	TRUE	Y	E	0.705	0.469177	0.0599895	0.28241	18	7.16667	25	10.5
UBA1		N	FALSE	Y	E	0.441	0.489636	0.0491273	0.0195	0	0	0	0
UBE2A	ENSGALG00000008648	N	FALSE	N	I	0.872	0.766494	0	0.182909	5	3.16667	1	1.33333
UBL4A	ENSGALG00000032537	N	FALSE	N	I	0.076	0.563372	0.0760551	0.0460667	0	0	0	0
UBQLN2	ENSGALG00000012585	N	FALSE	N	I	NA	0.436629	0.119882	0.109474	1	2.33333	4	2.33333
UPF3B	ENSGALG00000008618	N	FALSE	N	I	0.211	0.339385	0.126077	0.14619	2	0.666667	2	0.166667
UPRT	ENSGALG00000007793	N	FALSE	N	I	0.094	0.584795	0.242987	0.0255417	0	1	0	0.166667
USP11		N	FALSE	N	Discordant	0.19	0.336343	0.153636	NA	0	0	0	0
USP27X	ENSGALG00000029817	N	FALSE	N	No call	NA	0.153666	NA	0.181143	2	1.33333	6	5
USP51	ENSGALG00000029817	N	FALSE	N	I	NA	0.402247	0.229185	0.0580952	0	0.333333	5	4.16667
USP9X	ENSGALG00000016236	Y	TRUE	Y	E	0.477	0.643528	0.0205011	0.173927	25	21.1667	30	25.1667
UTP14A	ENSGALG00000024039	N	FALSE	N	I	0.339	0.598407	0.380988	0.012	0	0	0	0
UXT		N	FALSE	N	I	0.576	0.596052	0.261421	NA	0	0	0	0
VBP1	ENSGALG00000008389	N	FALSE	N	I	0.944	0.460937	0.0445387	0.0281538	2	0.5	0	0
VGLL1	ENSGALG00000006412	N	FALSE	N	E	0.563	0.0374033	0.811116	0.0675	0	0	0	0
VMA21	ENSGALG00000009065	N	FALSE	N	I	NA	0.467778	0.0539166	0.100476	0	0	0	0
VSIG1	ENSGALG00000008290	N	FALSE	N	No call	0.313	0.0557739	0.249677	0.0399545	0	0	0	0
VSIG4	ENSGALG00000044799	N	FALSE	N	No call	0.226	0.237392	0.513642	0.0591429	0	0	0	0
WAS		N	FALSE	N	VE	0.855	0.0819829	0.1495	0.0415	0	0	0	0
WDR13	ENSGALG00000044536	N	FALSE	N	I	0.116	0.563098	0.00785385	0.0487692	0	0	0	0
WDR44	ENSGALG00000005997	N	FALSE	N	I	0.871	0.589712	0.127135	0.270929	7	3.16667	7	2
WDR45		N	FALSE	N	I	0.233	0.614242	0.0204918	0.0561333	0	0	0	0
WNK3		N	FALSE	N	I	0.274	0.0845633	NA	0.306887	0	0	0	0
WWC3	ENSGALG00000034834	Y	FALSE	N	I	0.111	0.39401	NA	0.148871	4	4.83333	9	7.33333
XIAP	ENSGALG00000008491	N	FALSE	N	I	0.142	0.601506	0.155952	0.157448	0	0	0	0
XK	ENSGALG00000016262	Y	FALSE	N	I	0.444	0.296353	0.148775	0.0383902	0	0.166667	0	0
XKRX	ENSGALG00000006637	N	FALSE	N	I	0.179	0.0710865	0.136288	0.07725	3	1.5	6	1.66667
XPNPEP2	ENSGALG00000025935	N	FALSE	N	Discordant	0.346	0.259426	0.21947	0.0216667	0	0	0	0
YIPF6	ENSGALG00000035973	N	FALSE	N	I	0.128	0.590021	0.0814699	0.224549	0	0	0	0
YY2	ENSGALG00000017388	Y	FALSE	N	I	NA	NA	0.272038	0.00610526	1	2.5	8	11.6667
ZBTB33	ENSGALG00000008611	N	FALSE	N	I	0.537	0.456107	0.176935	0.110929	8	3.83333	5	2.83333
ZC3H12B	ENSGALG00000039391	N	FALSE	N	Discordant	0.293	0.343762	0.144556	0.174295	9	6.83333	12	4.5
ZC4H2	ENSGALG00000042725	N	FALSE	N	I	NA	0.568158	0	0.126038	1	0.166667	1	0
ZDHHC15	ENSGALG00000007800	N	FALSE	N	I	0.195	0.349933	0.0401969	0.0184231	0	1	4	1
ZDHHC9	ENSGALG00000031551	N	FALSE	N	I	0.536	0.376018	0.028288	0.158543	0	0	0	0
ZFX	ENSGALG00000016327	Y	TRUE	Y	E	0.379	0.57078	NA	0.138947	4	5.5	8	7.16667
ZIC3	ENSGALG00000031144	N	FALSE	N	I	0.854	0.0430453	0.0176968	0.30525	14	4.33333	7	3.33333
ZMYM3	ENSGALG00000005533	N	FALSE	N	I	0.563	0.391957	0.0787546	0.0025	2	1	0	0.5
ZRSR2	ENSGALG00000016552	Y	FALSE	Y	E	0.052	0.482775	0.16051	0.0014	0	0	0	0
