# Supplementary material for: Conserved microRNA targeting reveals preexisting gene dosage sensitivities that shaped amniote sex chromosome evolution
Source: Genome Res. 2018 Apr;28(4):474–83. doi: 10.1101/gr.230433.117 (PMC5880238; doi:10.1101/gr.230433.117)
Supplement: Supplemental Material [file supp_gr.230433.117_Supplemental_Table_S4.xlsx]

## Sheet: Sheet1
Legend: Properties of ancestral Z-linked genes assessed in this study
Gene	Chicken ID	Anolis ID	chicken W	4 birds W	14 birds W	Haploinsufficiency probability	Human expression breadth	Chicken-flycatcher dN/dS	Mean Pct	human-chicken conserved n. target sites	control seed human-chicken conserved n. target sites	human-anolis conserved n. target sites	control seed human-anolis conserved n. target sites	Chicken vs Human,Anolis log2(M/F) Heart	Chicken vs Human,Anolis log2(M/F) Brain	Chicken vs Human,Anolis log2(M/F) Kidney	Chicken vs Human,Anolis log2(M/F) Liver
AAED1	ENSGALG00000012624	ENSACAG00000012762	N	N	N	NA	0.38961	0.433221	0.0162727	0	0	0	0	0.455125	1.55566	0.675105	1.27303
ABCA1	ENSGALG00000015433	ENSACAG00000014282	N	N	N	0.628	0.241556	0.0586402	0.393455	13	6.16667	14	3.16667	0.950857	0.337117	NA	1.05538
ABHD17B	ENSGALG00000015139	ENSACAG00000012837	N	Y	Y	NA	0.380944	0.0212209	0.1665	12	3.33333	7	2.83333	1.07448	1.97572	1.24185	0.10634
ACAA2	ENSGALG00000002777	ENSACAG00000017990	N	N	N	0.154	0.214608	0.0699019	0.0782632	1	0	0	0	NA	NA	NA	NA
ACER2	ENSGALG00000015081	ENSACAG00000017629	N	N	N	NA	0.0703575	0.158131	0.224773	0	0	0	0	NA	NA	NA	NA
ACO1	ENSGALG00000002162	ENSACAG00000001541	N	N	N	0.207	0.316183	0.0610571	0.09425	1	0.166667	0	0	-0.314836	0.355755	0.617594	0.36832
ACOT12	ENSGALG00000015616	ENSACAG00000010998	N	N	N	0.11	0.0337405	0.20863	0.0808	0	0	0	0	NA	NA	0.462728	NA
ADAMTS12	ENSGALG00000003295	NA	N	Y	Y	0.091	0.210256	0.235845	0	0	0	0	0	NA	NA	NA	NA
ADAMTS19	ENSGALG00000000151	ENSACAG00000001491	N	N	N	0.273	0.171432	0.0893209	0.0991667	5	3.83333	7	4.33333	NA	NA	NA	NA
ADAMTS6	ENSGALG00000014751	ENSACAG00000015670	N	N	N	0.351	0.304597	0.0703192	NA	NA	NA	NA	NA	NA	NA	NA	NA
ADAMTSL1	ENSGALG00000020554	ENSACAG00000027734	N	N	N	NA	0.156582	0.181303	0.181176	6	1.66667	3	1.16667	NA	NA	NA	NA
AGGF1	ENSGALG00000004311	ENSACAG00000007847	N	N	N	0.445	0.564672	0.198929	0.154043	1	0	1	0	0.547031	0.409313	1.12959	-0.245794
AGTPBP1	ENSGALG00000012595	ENSACAG00000000770	N	N	N	0.61	0.411064	0.152638	0.0126731	22	13.3333	9	13	0.212357	0.496479	1.13167	NA
AGXT2	ENSGALG00000003432	ENSACAG00000008668	N	N	N	0.144	0.0315323	0.153021	0.0371667	0	0	0	0	NA	NA	1.62937	2.74091
AK3	ENSGALG00000014447	ENSACAG00000003605	N	N	N	0.332	0.53328	0.11944	0.139525	0	0	0	0	-0.27661	1.15375	0.598982	0.837738
AL133476.17	ENSGALG00000002326	ENSACAG00000012886	N	N	N	NA	NA	0.0628342	NA	NA	NA	NA	NA	NA	NA	NA	NA
ALDH1A1	ENSGALG00000015147	ENSACAG00000012229	N	N	N	0.35	0.327334	0.0805658	0.00925	0	1	0	0.333333	0.390091	NA	1.6624	-1.69392
ALDH7A1	ENSGALG00000008229	ENSACAG00000002899	N	N	N	0.378	0.322105	0.0842818	0.0144839	0	0	0	0	-0.0544744	1.7822	1.25196	0.36329
ALDOB	ENSGALG00000015544	ENSACAG00000017436	N	N	N	0.194	0.0343047	0.0799246	0.0157895	0	0	0	0.333333	0.555097	NA	1.13565	-1.17525
ALPK2	ENSGALG00000002898	ENSACAG00000010018	N	N	N	0.033	0.0843775	0.179336	0.031	0	0	0	0	NA	NA	NA	NA
AMACR	ENSGALG00000003326	NA	N	N	N	NA	0.221864	0.200046	0.00876923	2	1	1	0.833333	NA	NA	NA	NA
ANKDD1B	ENSGALG00000014958	ENSACAG00000008414	N	N	N	NA	0.220091	0.243237	0.013	0	0	0	0	NA	NA	NA	NA
ANKRA2	ENSGALG00000013511	ENSACAG00000009434	N	N	N	0.345	0.489635	0.0520571	0.184714	1	0.166667	0	0	0.728524	1.45476	1.15829	0.917807
ANKRD31	ENSGALG00000014945	ENSACAG00000008933	N	Y	Y	0.115	0.049464	NA	0.01825	0	0	0	0	NA	NA	NA	NA
ANKRD32	ENSGALG00000027932	ENSACAG00000013255	N	N	N	NA	0.201166	0.522609	0.024	0	1	0	0	NA	NA	NA	NA
ANKRD34B	ENSGALG00000015578	ENSACAG00000023023	N	N	N	0.286	0.0605355	0.26595	0.0156429	0	0	0	0	NA	NA	NA	NA
ANKRD55	ENSGALG00000014717	ENSACAG00000014766	N	N	N	0.092	0.143486	0.373075	0.082375	0	0	0	0	NA	1.31025	NA	NA
ANXA1	ENSGALG00000015148	ENSACAG00000011929	N	N	N	0.716	0.0614434	0.123202	0.0108889	0	0	0	0	0.563485	0.102558	0.523899	-1.04739
AP3B1	ENSGALG00000004390	ENSACAG00000007430	N	N	N	0.335	0.535103	0.231202	0.106536	7	4.33333	5	3.66667	1.15237	1.96449	0.877582	1.04348
AP3S1	ENSGALG00000002341	ENSACAG00000028530	N	Y	Y	0.482	0.54583	0.155392	0.246091	5	2.83333	0	0.333333	1.06315	0.792274	0.619822	0.746771
APBA1	ENSGALG00000015111	ENSACAG00000001040	N	N	N	0.128	0.226234	0.0471775	0.142609	8	2	4	1.83333	NA	-0.387276	0.0131763	NA
APC	ENSGALG00000000220	ENSACAG00000007490	N	N	Y	0.467	0.188209	0.0977586	0.218468	13	9.66667	5	6.33333	0.992378	0.111639	1.46802	NA
APH1A	ENSGALG00000002578	NA	N	N	N	0.081	0.545808	0.0536874	0.133278	1	0.166667	0	0	NA	NA	NA	NA
APTX	ENSGALG00000001954	ENSACAG00000003581	N	N	N	0.064	0.497076	0.277145	0.0167381	0	0	0	0.5	1.15724	1.35933	0.613431	1.03623
AQP3	ENSGALG00000002452	ENSACAG00000012625	N	Y	Y	0.326	0.0676115	0.0863325	0.0385	0	0	0	0	NA	NA	-0.309357	NA
AQPEP;	ENSGALG00000002318	ENSACAG00000008112	N	N	N	NA	NA	0.379843	NA	NA	NA	NA	NA	NA	NA	NA	NA
ARHGEF28	ENSGALG00000014923	ENSACAG00000009305	N	N	N	NA	0.239735	0.268158	0.116111	0	0	0	0.166667	NA	NA	NA	NA
ARHGEF39	ENSGALG00000002599	ENSACAG00000009488	N	N	N	NA	0.219918	0.199959	0.083	0	0	0	0.5	NA	NA	NA	NA
ARID3C	ENSGALG00000005839	ENSACAG00000022472	N	N	Y	0.288	0.127821	0.123248	NA	0	NA	0	0	NA	NA	NA	NA
ARL15	ENSGALG00000014911	ENSACAG00000015517	N	Y	Y	0.547	0.563766	0.0965487	0.148115	7	6.33333	0	2.16667	0.716835	-0.903817	0.437256	0.909865
ARRDC3	ENSGALG00000025915	ENSACAG00000013384	N	Y	Y	0.765	0.287008	0.0870249	0.360114	30	15.8333	29	13.1667	1.66332	0.518411	-0.448512	0.646521
ARSB	ENSGALG00000004438	ENSACAG00000016838	N	N	N	0.054	0.235081	0.163058	0.05234	0	0	1	0.166667	0.427525	0.78181	1.28863	NA
ARSK	ENSGALG00000014672	ENSACAG00000013015	N	N	N	0.04	0.453331	0.208448	0.0362	0	0	0	0	0.65178	0.368754	0.535389	1.21301
ATG10	ENSGALG00000027714	ENSACAG00000028708	N	N	N	0.058	0.34295	0.192669	0.0235333	0	0	0	0	1.26799	1.2161	1.12682	0.943879
ATG12	ENSGALG00000002345	ENSACAG00000008076	N	N	N	0.088	0.486034	0.105136	0.0258511	0	0	0	0.333333	0.991287	0.598505	0.902054	1.03906
ATP5A1	ENSGALG00000014644	ENSACAG00000012698	Y	Y	Y	0.235	0.361411	NA	0.00212821	0	0.166667	0	0.166667	NA	NA	NA	NA
ATP5I	ENSGALG00000015372	ENSACAG00000001268	N	N	N	0.717	0.504632	NA	0	0	0	0	0	-0.705609	1.5538	0.652333	0.892081
ATP6AP1L	ENSGALG00000015618	ENSACAG00000011150	N	N	N	NA	0.324501	0.0666936	0.000666667	0	0	0	0	NA	2.03826	NA	NA
ATP8B1	ENSGALG00000003253	ENSACAG00000009654	N	N	N	0.12	0.187403	0.0893256	0.1295	0	0	0	0.333333	NA	NA	NA	NA
AUH	ENSGALG00000021843	ENSACAG00000028614	N	N	N	0.108	0.356601	0.0765705	0.09325	2	0.166667	0	0.166667	-0.602728	0.256954	0.86248	0.61974
AVD	ENSGALG00000023622	NA	N	N	Y	NA	NA	0.364225	NA	NA	NA	NA	NA	NA	NA	NA	NA
AVR2	ENSGALG00000028039	NA	N	N	N	NA	NA	0.337553	NA	NA	NA	NA	NA	NA	NA	NA	NA
B4GALT1	ENSGALG00000002022	ENSACAG00000003414	N	N	N	0.497	0.393319	0.111844	0.135903	0	0.833333	0	0.166667	1.04507	1.28504	-0.173044	1.25019
BDP1	ENSGALG00000002439	ENSACAG00000010001	N	N	N	0.225	0.368373	0.278329	0.0825714	0	0	0	0	1.05212	-0.108402	0.931181	NA
BHMT2	ENSGALG00000004518	ENSACAG00000016768	N	N	N	0.048	0.118289	0.129223	0.0106667	0	0	0	0	0.754335	1.16852	1.63979	0.410701
BNC2	ENSGALG00000015101	ENSACAG00000017743	N	N	N	0.533	0.178949	0.0531787	0.260825	32	19.5	24	11.1667	NA	NA	1.57007	NA
BRIX1	ENSGALG00000003373	ENSACAG00000008586	N	N	N	NA	0.612109	0.117898	0.0337692	0	0	0	0	0.70656	1.56965	1.76271	1.54601
BTF3	ENSGALG00000013512	ENSACAG00000009509	Y	Y	Y	0.352	0.522421	NA	0.2235	3	1.16667	3	0.833333	NA	NA	NA	NA
C18orf25	ENSGALG00000001763	ENSACAG00000012627	Y	Y	Y	NA	0.395061	0.164155	0.235475	10	5.33333	11	4.33333	NA	NA	NA	NA
C18orf32	ENSGALG00000006803	ENSACAG00000029325	N	N	N	NA	0.363121	0.00922766	0.0221333	0	0	0	0	NA	NA	NA	NA
C18orf54	NA	NA	N	N	N	NA	0.131187	NA	0.0466429	0	0	0	0	NA	NA	NA	NA
C1QTNF3	ENSGALG00000027887	NA	N	N	Y	NA	0.282218	0.0206948	0.0168889	0	0	0	0	NA	NA	NA	NA
C5orf28	ENSGALG00000014863	ENSACAG00000010797	N	N	N	NA	0.255948	0.132061	0.060619	0	0	0	0	0.758597	0.500592	1.00971	1.82797
C5orf30	ENSGALG00000027512	ENSACAG00000006723	N	N	Y	NA	0.344286	0.137979	0.22452	4	2	8	1.83333	0.146267	0.518521	0.363113	NA
C5orf34	ENSGALG00000014865	ENSACAG00000010801	N	N	N	NA	0.185489	0.439533	0.024	0	0	0	0	NA	NA	NA	NA
C5orf42	ENSGALG00000003631	ENSACAG00000024019	N	Y	Y	NA	0.344473	0.443983	0.0165789	0	0	0	0	NA	NA	NA	NA
C5orf51	XM_424778.3	ENSACAG00000010599	N	N	N	NA	0.547278	NA	0.0759688	0	0	0	0.333333	NA	NA	NA	NA
C5orf63	ENSGALG00000028135	ENSACAG00000002752	N	N	N	NA	0.246818	0.276174	0.0164182	0	0	0	0	-0.0363126	1.17862	0.685172	-0.441443
C6	ENSGALG00000014840	ENSACAG00000022087	N	N	Y	0.053	0.0633726	0.235392	0.026125	0	0	0	0	NA	NA	NA	1.33999
C7	ENSGALG00000014835	ENSACAG00000010303	N	N	N	0.377	0.206152	0.246224	0.054119	0	0	0	0	1.54447	NA	-0.614425	2.24119
C9	NA	NA	N	N	N	NA	0.031603	NA	0.0128333	0	0	0	0	NA	NA	NA	NA
C9orf103	ENSGALG00000012583	ENSACAG00000002000	N	N	N	NA	NA	0.344914	NA	NA	NA	NA	NA	NA	NA	NA	NA
C9orf24	ENSGALG00000005818	ENSACAG00000005962	N	N	N	NA	0.0703547	NA	0.001	0	0.166667	0	0	NA	NA	NA	NA
C9orf3	ENSGALG00000012615	ENSACAG00000013209	N	N	N	NA	0.35386	0.311491	0.0493684	0	0.166667	0	0.666667	NA	NA	NA	NA
c9orf40	ENSGALG00000021845	NA	N	N	N	NA	NA	NA	NA	NA	NA	NA	NA	NA	NA	NA	NA
C9orf41	ENSGALG00000015155	ENSACAG00000029442	N	N	Y	NA	0.331627	0.047432	0.0594667	6	3.33333	4	3.66667	NA	NA	NA	NA
C9orf64	ENSGALG00000012589	ENSACAG00000001721	N	N	N	NA	0.479279	0.114396	0.0671481	0	0	0	0	-0.369764	1.59641	1.15134	0.0668657
C9orf72	ENSGALG00000001864	ENSACAG00000010697	N	N	N	NA	0.243231	0.0200118	0.14296	1	0.166667	1	0.166667	1.36937	0.499928	1.37569	0.41333
C9orf84	ENSGALG00000027341	ENSACAG00000012617	N	N	N	NA	0.0397108	0.381679	0.004375	0	0	0	0	NA	NA	NA	NA
C9orf85	ENSGALG00000026001	ENSACAG00000012828	N	N	N	NA	0.6157	0.326203	0.0307879	0	0	0	0	0.965476	1.88979	1.14544	-0.270595
CA9	ENSGALG00000021340	ENSACAG00000009514	N	N	N	0.333	0.0428814	0.221978	0.0703333	0	0	0	0	NA	NA	NA	NA
CAAP1	ENSGALG00000001765	ENSACAG00000017515	N	N	N	NA	0.367447	0.166297	0.0498421	0	2.16667	0	1.5	1.17752	1.78751	1.57599	0.937819
CAMK4	ENSGALG00000000244	ENSACAG00000007256	N	N	N	0.153	0.0540582	0.152254	0.122485	2	0.666667	2	0.833333	NA	-1.64007	NA	NA
CAPSL	ENSGALG00000013376	ENSACAG00000028384	N	N	N	0.084	0.11616	0.239247	0	0	0	0	0	NA	NA	NA	NA
CARTPT	ENSGALG00000028845	ENSACAG00000009933	N	N	N	0.295	0.0773855	NA	0.001	0	0	0	0.166667	NA	NA	NA	NA
CAST	ENSGALG00000014682	ENSACAG00000012586	N	N	N	0.215	0.36881	0.360049	0.2238	2	0.333333	2	0.166667	0.437805	0.728745	1.36554	0.533239
CBWD1	ENSGALG00000010147	ENSACAG00000001658	N	N	N	0.124	0.545974	0.128385	0.014	0	0.666667	0	0.166667	1.02235	0.969016	1.17913	2.39538
CCBE1	ENSGALG00000027785	ENSACAG00000005291	N	N	Y	0.139	0.149626	0.0893437	0.0735682	0	0	0	0	NA	NA	1.17526	NA
CCDC11	NA	NA	N	N	N	NA	0.0462877	NA	NA	0	0	0	0	NA	NA	NA	NA
CCDC112	ENSGALG00000023042	ENSACAG00000008012	N	N	N	0.227	0.231985	0.382164	0.00766667	0	0	0	0	NA	NA	NA	NA
CCDC125	ENSGALG00000015572	ENSACAG00000010353	N	N	N	0.115	0.574288	0.219408	0.00729412	0	0.333333	0	0.166667	NA	0.0486951	0.206233	NA
CCDC152	ENSGALG00000023503	ENSACAG00000010689	N	N	N	NA	0.221649	0.264415	0.0419524	2	1.66667	2	1.16667	NA	NA	NA	NA
CCDC171	ENSGALG00000015103	ENSACAG00000017752	N	N	N	NA	0.123497	0.704836	0.147596	21	25	18	23.1667	NA	1.22534	0.801253	NA
CCL19	ENSGALG00000028256	NA	N	N	N	NA	0.247891	0.245071	0.0925	0	0	0	0	NA	NA	NA	NA
CCNH	ENSGALG00000015641	ENSACAG00000000627	N	N	N	0.702	0.397739	0.189858	0.00944444	0	0	0	0	0.409278	0.873865	1.17411	1.78204
CCNO	ENSGALG00000028595	ENSACAG00000015399	N	N	N	0.068	0.164515	0.0791033	0.0187241	0	0	0	0	NA	NA	NA	NA
CD180	ENSGALG00000023411	ENSACAG00000016275	N	N	N	0.054	0.0689896	NA	0.0682683	0	0	0	0	NA	NA	NA	NA
CD274	ENSGALG00000015032	ENSACAG00000029075	N	N	N	0.03	0.151442	0.350611	0.119844	0	0	0	0	NA	NA	NA	NA
CDC14B	ENSGALG00000012627	ENSACAG00000012788	N	N	N	NA	0.523833	0.33806	0.00733333	4	2	0	0	2.08616	1.48673	1.20264	-1.51991
CDC20B	ENSGALG00000027709	ENSACAG00000015417	N	Y	Y	0.128	0.0391236	NA	0.0265833	0	0.666667	0	0.166667	NA	NA	NA	NA
CDC37L1	ENSGALG00000014448	ENSACAG00000003578	N	Y	Y	0.102	0.373156	0.237238	0.299719	10	2.33333	11	1.16667	-0.221164	-0.233558	0.746048	1.47134
CDC42SE2	ENSGALG00000027258	ENSACAG00000001389	N	N	Y	0.221	0.456418	0.0229358	0.113684	4	4	3	3.33333	-0.0438594	0.461489	-0.352386	NA
CDK7	ENSGALG00000014790	ENSACAG00000016452	N	N	N	0.72	0.356738	0.0713398	0.033	0	0	0	0	0.391482	0.709104	1.33464	1.25082
CDKN2B	ENSGALG00000026137	ENSACAG00000017544	N	N	N	0.479	0.178165	0.0955391	0.0535	4	1	2	0.666667	NA	NA	NA	NA
CDO1	ENSGALG00000002358	ENSACAG00000008057	N	N	N	0.211	0.143359	0.124484	0.0124286	0	0.166667	0	0	1.47559	-1.25524	-0.436821	0.0902457
CELF4	ENSGALG00000002413	ENSACAG00000012428	N	N	N	NA	0.143667	0.00760234	0.357929	13	12.3333	12	10.1667	NA	-1.02029	NA	NA
CENPH	ENSGALG00000014788	ENSACAG00000016440	N	N	N	0.134	0.098778	NA	0.00107692	0	0	0	0	NA	NA	1.2111	NA
CENPK	ENSGALG00000014753	ENSACAG00000015759	N	N	Y	0.446	0.132502	0.773563	0.00533333	0	0.666667	0	0.166667	NA	NA	1.13279	NA
CEP120	ENSGALG00000005368	ENSACAG00000003259	N	N	N	NA	0.390311	0.290101	0.0374286	4	1	0	0	0.728552	0.376932	1.09223	-0.444442
CEP78	ENSGALG00000015179	ENSACAG00000005485	N	N	N	0.177	0.331325	0.302173	0.00655738	0	0.166667	0	0	2.003	0.207506	1.09462	NA
CER1	ENSGALG00000005434	ENSACAG00000017792	N	N	N	0.257	0.092936	0.535759	0	0	0	0	0	NA	NA	NA	NA
CETN3	ENSGALG00000014648	ENSACAG00000000119	N	N	N	0.949	0.122576	0.0986891	0.0595238	0	0	3	0.5	1.20573	2.22318	1.88458	0.703736
CFC1B	ENSGALG00000012623	ENSACAG00000012757	N	N	N	NA	0.0496642	0.519397	0.047	0	NA	0	0	NA	NA	NA	NA
CHB1	ENSGALG00000021353	ENSACAG00000023891	N	N	N	NA	NA	0.184885	NA	NA	NA	NA	NA	NA	NA	NA	NA
CHD1	ENSGALG00000014642	ENSACAG00000011210	Y	Y	Y	0.815	0.450224	0.0305729	0.374667	19	13.3333	10	5.66667	2.39048	1.04896	1.50729	0.293433
CHRNB3	ENSGALG00000015384	ENSACAG00000005630	N	N	N	NA	0.0769428	0.0904083	0.009	0	0	0	0	NA	NA	NA	NA
CHSY3	ENSGALG00000026899	ENSACAG00000001454	N	N	N	0.22	0.150556	0.102046	0.164054	3	5.5	9	3	NA	NA	NA	NA
CKMT2	ENSGALG00000015602	ENSACAG00000010857	N	Y	Y	0.138	0.0782924	0.0212194	0	0	0	0	0	-1.05159	NA	NA	NA
CKS2	ENSGALG00000010693	ENSACAG00000016581	N	N	N	0.949	0.0790746	NA	0.0466	2	3	1	3.5	NA	NA	NA	NA
CLTA	ENSGALG00000015326	ENSACAG00000001991	N	N	N	0.153	0.693051	0.160009	0.543667	4	0.666667	4	0.833333	1.31993	0.898615	0.202077	0.701119
CMYA5	ENSGALG00000026553	ENSACAG00000016641	N	Y	Y	0.08	0.0472407	0.3744	0.00285714	0	0	0	0	NA	NA	NA	NA
CNTFR	ENSGALG00000028140	ENSACAG00000014122	N	N	N	0.378	0.286855	0.097754	0.303923	1	0.333333	0	0	NA	0.451618	-2.14615	NA
CNTLN	ENSGALG00000015097	ENSACAG00000017738	N	N	N	0.17	0.399212	NA	0.00513889	1	0	0	0	NA	NA	NA	NA
CNTNAP4	ENSGALG00000023179	ENSACAG00000016407	N	N	N	0.188	0.085155	0.222427	0.00725	2	0.333333	0	0.333333	NA	2.3097	NA	NA
COL4A3BP	ENSGALG00000014952	ENSACAG00000008556	N	Y	Y	0.193	0.541119	0.164057	0.188132	17	8.83333	15	7.5	1.193	0.291899	1.25057	0.706912
COMMD10	ENSGALG00000002308	ENSACAG00000008166	N	N	N	0.201	0.559771	0.347685	0.0231034	1	1	0	0.166667	0.210137	0.591971	0.451699	0.711717
CORO2A	ENSGALG00000001933	ENSACAG00000004130	N	N	N	0.125	0.279373	0.247691	0.113541	0	0	0	0	NA	NA	NA	NA
COX7C	ENSGALG00000027963	ENSACAG00000001016	N	N	N	0.001	0.544426	0.078964	0.0527931	0	0	0	0	-0.0174781	1.39478	0.617624	0.610741
CPLX1	ENSGALG00000015332	ENSACAG00000001829	N	N	N	NA	0.174963	0.0584864	0.2363	0	0	4	0.333333	NA	-0.900673	NA	NA
CPLX4	ENSGALG00000002817	ENSACAG00000007605	N	N	N	0.187	0.0398921	0.0284217	0.0411667	0	1.66667	1	0.166667	NA	NA	NA	NA
CREB3	ENSGALG00000002523	ENSACAG00000011429	N	N	N	0.176	0.46269	0.435151	0.0375	0	0	0	0	0.713136	0.613429	0.0152128	1.58303
CRHBP	ENSGALG00000014994	ENSACAG00000007916	N	N	N	0.662	0.143121	0.102432	0.0415	0	0.166667	0	0	NA	1.04461	NA	NA
CTC-534A2.2	ENSGALG00000020567	ENSACAG00000021086	N	N	N	NA	0.532558	NA	0.00507692	0	0	0	0	NA	NA	NA	NA
CTIF	ENSGALG00000023718	NA	Y	Y	Y	NA	0.42928	NA	0.223645	1	0.666667	0	0.5	NA	NA	NA	NA
CTSL	ENSGALG00000012610	ENSACAG00000013328	N	N	N	NA	0.379163	0.0961491	0.02675	0	0	0	0	-0.0903809	0.217238	-0.230738	-0.603649
CTXN3	ENSGALG00000029034	ENSACAG00000002612	N	N	N	0.524	0.0815999	0.0798334	0.0495714	0	0	0	0	NA	NA	NA	NA
CWC27	ENSGALG00000014747	ENSACAG00000015631	N	N	N	NA	0.515272	0.0887861	0	0	0.166667	0	0.333333	0.733816	1.09282	1.58943	0.842866
cZorf13	NA	NA	N	N	N	NA	NA	NA	NA	NA	NA	NA	NA	NA	NA	NA	NA
cZorf18	NA	NA	N	N	N	NA	NA	NA	NA	NA	NA	NA	NA	NA	NA	NA	NA
cZorf2	ENSGALG00000005812	NA	N	Y	Y	NA	NA	0.282912	NA	NA	NA	NA	NA	NA	NA	NA	NA
cZorf7	ENSGALG00000021452	NA	N	N	N	NA	NA	0.45429	NA	NA	NA	NA	NA	NA	NA	NA	NA
DAB2	ENSGALG00000003803	ENSACAG00000010173	N	N	Y	0.279	0.239423	0.442083	0.180292	0	0	0	0	-0.15443	-0.384507	0.975639	NA
DAPK1	ENSGALG00000012608	ENSACAG00000013377	N	N	Y	0.148	0.429245	0.0653096	0.134095	5	1.33333	4	1.33333	0.666905	-0.804035	-0.791565	-1.80998
DCAF10	ENSGALG00000005390	ENSACAG00000012138	N	N	N	NA	0.378001	0.0228793	0.14896	0	0	1	0.166667	-0.00990742	0.18699	1.28454	1.45778
DCAF12	ENSGALG00000005800	ENSACAG00000012964	N	Y	Y	NA	0.260773	0.0574829	0.217121	2	1	2	0.666667	0.595506	0.398654	0.301246	0.102975
DCC	NA	NA	N	N	N	NA	0.0552093	NA	0.114	0	0	11	7.16667	NA	NA	NA	NA
DCP2	ENSGALG00000000215	ENSACAG00000007587	N	N	N	0.379	0.399541	0.198262	0.2574	4	1.33333	7	2	1.61535	0.699265	0.494903	0.491106
DCTN3	ENSGALG00000021365	NA	N	N	Y	0.077	0.465798	0.244369	0.0259714	0	1.16667	0	0	NA	NA	NA	NA
DDX4	ENSGALG00000014713	ENSACAG00000014951	N	N	N	0.583	0.032069	0.37036	0.0496562	0	0	0	0	NA	NA	NA	NA
DDX58	NA	NA	N	N	N	NA	0.577006	NA	0.0132593	0	0	0	0	NA	NA	NA	NA
DENND4C	ENSGALG00000015083	ENSACAG00000017643	N	N	N	0.318	0.463077	0.158413	0.163259	0	0	0	0	1.30405	0.708438	1.16114	0.0944344
DEPDC1B	ENSGALG00000014729	ENSACAG00000009000	N	N	N	0.728	0.103526	0.103302	0.175059	0	0	0	0	NA	NA	NA	NA
DGKQ	ENSGALG00000002142	ENSACAG00000000256	N	N	N	0.072	0.327219	0.0996527	0.0412286	0	0	0	0	NA	0.412845	0.0445035	NA
DHFR	ENSGALG00000026757	ENSACAG00000010508	N	N	N	NA	0.337785	0.135641	0.00961538	0	0	0	0	0.277715	1.15909	1.36556	-1.68091
DHX29	ENSGALG00000014700	ENSACAG00000015328	N	N	N	0.588	0.545148	0.126674	0.13875	0	0	0	0	0.827309	0.588196	0.755135	1.76702
DIMT1L	ENSGALG00000020569	ENSACAG00000008504	N	N	N	0.247	NA	0.118473	NA	NA	NA	NA	NA	NA	NA	NA	NA
DIRAS2	ENSGALG00000005323	ENSACAG00000000763	N	N	N	0.16	0.0629094	0.0237134	0.151261	2	1.33333	0	0	NA	-0.653282	NA	NA
DMGDH	ENSGALG00000004491	ENSACAG00000016799	N	N	N	0.076	0.078665	0.103751	0.00634	0	1	1	0.833333	NA	-0.329548	1.64558	-0.000230008
DMRT1	ENSGALG00000010160	ENSACAG00000002356	N	N	N	0.414	0.0319651	0.20379	0.00855556	1	1.83333	0	1.16667	NA	NA	NA	NA
DMRT2	ENSGALG00000026790	ENSACAG00000002411	N	N	N	NA	0.150375	0.162716	0.0206	4	3	7	2	NA	NA	1.08905	NA
DMRT3	ENSGALG00000010161	ENSACAG00000002401	N	N	N	0.145	0.0832218	0.200899	0.309933	9	4.83333	10	3.5	NA	NA	NA	NA
DMXL1	ENSGALG00000002227	ENSACAG00000004113	N	N	N	0.631	0.515536	0.130981	0.237146	5	1.16667	4	0.5	0.648008	0.598312	2.22112	0.657548
DNAI1	ENSGALG00000005831	ENSACAG00000005991	N	N	N	0.273	0.0634484	0.366165	0.0208	0	0	0	0	NA	0.666912	NA	NA
DNAJA1	ENSGALG00000023066	ENSACAG00000003517	N	N	N	0.411	0.502177	0.0316708	0.11125	0	0.166667	1	0.166667	0.917465	0.547011	0.517646	0.763702
DNAJB5	ENSGALG00000001918	ENSACAG00000014160	N	Y	Y	0.682	0.298532	0.0448819	0.21063	2	0.166667	0	0	-1.45911	0.548648	0.851948	NA
DNAJC21	ENSGALG00000003387	ENSACAG00000021095	N	N	N	0.118	0.318015	0.22375	0.031475	0	0	0	0.5	0.784103	0.853389	1.74213	0.734764
DNAJC25	ENSGALG00000015684	ENSACAG00000012657	N	N	N	NA	0.496072	0.13279	0.1913	0	0	0	0	-0.0738049	0.565479	0.509863	-0.0656315
DOCK8	ENSGALG00000010156	ENSACAG00000001924	N	N	N	0.407	0.154675	0.106713	0.0453478	0	0	0	0	-1.05864	1.77943	1.80953	NA
DTWD2	ENSGALG00000002250	ENSACAG00000004172	N	N	N	0.139	0.438355	0.12091	0.0499211	0	0.333333	0	0	NA	0.499417	1.82294	NA
DYM	ENSGALG00000002677	ENSACAG00000018002	N	N	Y	0.151	0.533059	0.0433865	0.0623939	0	0	0	0	NA	NA	NA	NA
EDIL3	ENSGALG00000015630	ENSACAG00000011454	N	N	N	0.395	0.147201	0.0465013	0.0946486	6	8.33333	8	6.66667	NA	1.4462	NA	NA
EFNA5	ENSGALG00000000280	ENSACAG00000006783	N	N	Y	0.29	0.262945	0.141572	0.210667	27	18.5	22	14.6667	-0.457556	-1.79417	-0.72735	NA
EGFLAM	ENSGALG00000003726	ENSACAG00000021140	N	N	Y	0.177	0.209482	0.0783753	0.0431	1	0.166667	0	0	NA	NA	-1.48475	NA
ELAC1	NA	NA	N	N	N	NA	0.385747	NA	0.0204211	0	0	0	0.833333	NA	NA	NA	NA
ELAVL2	ENSGALG00000015799	ENSACAG00000017521	N	N	N	0.519	0.155612	0.0338398	0.447184	30	24	37	23.6667	NA	-1.0557	NA	NA
ELL2	ENSGALG00000014678	ENSACAG00000012873	N	N	N	0.387	0.278316	0.454336	0.28937	23	11	21	4.5	3.76479	0.662053	-0.181886	0.537721
ELOVL7	ENSGALG00000014730	ENSACAG00000008996	N	Y	Y	0.106	0.249992	0.0678342	0.0877742	1	0.166667	1	0.333333	1.16613	1.06805	1.03807	NA
EMB	ENSGALG00000014877	ENSACAG00000011296	N	N	N	0.034	0.187316	0.572487	0.0509074	0	0	0	0	2.61027	-0.398412	NA	NA
ENC1	ENSGALG00000014930	ENSACAG00000001854	N	N	N	0.756	0.0959088	0.00412584	0.142879	14	7.5	11	4.16667	NA	NA	NA	NA
ENSGALG00000018534	ENSGALG00000018534	ENSACAG00000009440	N	N	Y	NA	NA	0.524578	NA	NA	NA	NA	NA	NA	NA	NA	NA
EPB41L4A	ENSGALG00000000234	ENSACAG00000007361	N	N	N	0.105	0.221746	0.109471	0.16196	0	0	0	0	NA	0.848798	1.18312	NA
EPG5	ENSGALG00000001732	ENSACAG00000012846	N	N	N	NA	0.488053	0.15165	0.108452	1	0.333333	2	0.333333	NA	NA	NA	NA
ERAP1	ENSGALG00000014684	ENSACAG00000012299	N	N	N	0.09	0.474366	NA	0.0231875	0	0	0	0	0.528237	2.80649	1.55685	0.292618
ERBB2IP	ENSGALG00000014773	ENSACAG00000016015	N	N	Y	0.378	0.444633	0.119693	0.188585	22	9.16667	18	6.5	0.938702	1.38598	1.38137	0.0528147
ERCC6L2	ENSGALG00000012621	ENSACAG00000012947	N	N	Y	NA	0.47031	0.304706	0.0297442	0	0	0	0	0.595372	0.477838	1.54486	NA
ERCC8	ENSGALG00000014732	ENSACAG00000008899	N	N	N	0.453	0.491553	0.159869	0.0109706	0	0	0	0	0.0588522	1.33071	0.727508	0.651222
ERMP1	ENSGALG00000000438	ENSACAG00000004052	N	N	N	0.142	0.329698	0.187865	0.0810789	0	3.33333	1	2.33333	0.131289	0.798769	-0.644227	NA
ESM1	ENSGALG00000027707	ENSACAG00000015483	N	N	Y	0.112	0.0804629	0.0619768	0.152667	0	0.166667	0	0	NA	NA	0.971779	NA
F2R	ENSGALG00000014983	ENSACAG00000007987	N	N	N	0.063	0.226515	0.199495	0.0411	0	0	0	0	1.02499	-0.590549	1.03732	NA
F2RL1	ENSGALG00000014984	NA	N	N	N	0.272	0.124807	0.266591	0.025	0	0	0	0	NA	NA	NA	NA
F2RL2	ENSGALG00000023379	ENSACAG00000008312	N	N	N	0.114	0.198851	0.117363	0.0406364	0	0	0	0	NA	NA	NA	NA
FAM151B	ENSGALG00000015577	ENSACAG00000010503	N	N	N	0.083	0.446298	0.107903	0.043	0	0	0	0	NA	NA	0.120117	NA
FAM154A	ENSGALG00000027314	NA	N	N	N	0.157	0.0322268	NA	0.0338889	0	0.166667	0	0	NA	NA	NA	NA
FAM169A	ENSGALG00000014943	ENSACAG00000008952	N	N	Y	NA	0.255915	0.506187	0.0654222	1	1.66667	3	2.16667	NA	-0.691068	NA	NA
FAM172A	ENSGALG00000014661	ENSACAG00000013305	N	N	N	NA	0.404963	0.188854	0.108294	5	2.16667	2	0.5	1.07698	1.05985	1.27684	NA
FAM174A	ENSGALG00000026203	ENSACAG00000004457	N	N	N	NA	0.505452	0.0825616	0.13	0	0	1	0	0.50465	0.791993	0.214879	0.840933
FAM189A2	ENSGALG00000015110	ENSACAG00000001191	N	N	N	NA	0.117838	0.556125	0.08275	0	0	0	0	0.35947	1.17062	-0.450495	NA
FAM214B	ENSGALG00000002069	ENSACAG00000011538	N	N	Y	NA	0.522992	0.326079	0.170375	0	0	0	0	NA	NA	NA	NA
FAM219A	ENSGALG00000005821	ENSACAG00000005973	N	Y	Y	NA	0.388499	0	0.0484722	1	1.5	5	1.83333	1.09863	0.574279	-0.124635	NA
FAM81B	ENSGALG00000014669	ENSACAG00000013172	N	N	N	0.059	0.0414397	NA	0.007	0	0	0	0	NA	NA	NA	NA
FANCC	ENSGALG00000012618	ENSACAG00000013146	N	N	N	0.065	0.192763	0.263963	0.040963	0	0	0	0	NA	NA	0.396952	NA
FANCG	ENSGALG00000002009	ENSACAG00000029190	N	N	N	NA	0.291408	0.339419	0.0286	0	0	0	0	NA	2.16381	NA	NA
FBN2	ENSGALG00000014686	ENSACAG00000001711	N	N	N	0.625	0.155697	0.0770812	0.296655	19	7.66667	16	4.16667	NA	NA	NA	NA
FBP1	ENSGALG00000012613	ENSACAG00000013243	N	N	N	0.356	0.0957498	0.050358	0.0146667	0	0	0	0	NA	NA	-0.734383	-0.237158
FBP2	ENSGALG00000012612	NA	N	N	N	0.157	0.0413836	0.0733728	0.00433333	1	0.166667	0	0	NA	NA	NA	NA
FBXL17	ENSGALG00000000276	ENSACAG00000006821	N	N	N	0.531	0.431703	0.0555769	0.216438	3	1.33333	5	0.666667	0.256101	-0.149004	0.793204	1.13732
FBXO10	No	ENSG00000147912	ENSG00000147912	N	N	0.306	0.238729	NA	0.37315	0	0	0	0	NA	NA	NA	NA
FBXO4	ENSGALG00000014851	ENSACAG00000010612	N	N	N	0.092	0.495837	0.209656	0.008	0	0	0	0	2.06836	2.15475	0.430217	2.31461
FCHO2	ENSGALG00000015019	ENSACAG00000009572	N	N	Y	0.664	0.453791	0.0840926	0.219852	12	4.5	7	2.5	NA	NA	NA	NA
FECH	ENSGALG00000003066	ENSACAG00000009424	N	N	N	0.355	0.610302	0.0321339	0.0260179	0	0	0	0	NA	NA	NA	NA
FEM1C	ENSGALG00000008204	ENSACAG00000008023	N	Y	Y	0.578	0.53046	0.0629001	0.237109	11	4.5	11	5.16667	0.0487205	0.572017	0.697954	1.78696
FER	ENSGALG00000000273	ENSACAG00000006839	N	N	N	0.094	0.370514	0.0225038	0.0624531	3	4	5	3.83333	1.38947	0.721503	0.698407	NA
FGF10	ENSGALG00000014872	NA	N	N	N	0.562	0.151743	0.0144357	0.1755	11	6.83333	8	4.83333	NA	NA	NA	NA
FKTN	ENSGALG00000015443	ENSACAG00000004546	N	N	N	0.079	0.502393	0.106444	0.00308696	2	1.33333	3	1.33333	-0.240773	0.222543	1.0288	NA
FLNC-like	ENSGALG00000014707	NA	N	N	N	NA	NA	0.249311	NA	NA	NA	NA	NA	NA	NA	NA	NA
FNTA	ENSGALG00000015397	ENSACAG00000005961	N	N	N	0.397	0.370141	0.116078	0.0967	0	0	3	0.666667	1.05342	1.68556	0.103507	0.792093
FOCAD	ENSGALG00000026072	ENSACAG00000017585	N	N	N	NA	0.387224	NA	0.0458333	0	0	0	0	NA	NA	NA	NA
FOXB2	ENSGALG00000028819	ENSACAG00000023403	N	N	N	0.551	0.0353191	NA	NA	NA	NA	NA	NA	NA	NA	NA	NA
FOXD1	ENSGALG00000012644	ENSACAG00000008123	N	N	N	NA	0.0892755	0.00699961	0.114964	5	3.83333	4	2.83333	NA	NA	NA	NA
FOXE1	ENSGALG00000026252	ENSACAG00000009553	N	N	N	NA	0.0346914	0.00742403	0.0370811	0	0	0	0	NA	NA	NA	NA
FREM1	ENSGALG00000005426	ENSACAG00000017780	N	N	N	0.085	0.15122	0.256101	0.0580556	0	0	0	0	-1.41661	NA	-1.1379	NA
FRMD3	ENSGALG00000012577	ENSACAG00000002032	N	N	N	0.139	0.315729	0.0666473	0.042125	8	4.33333	6	4	NA	-0.00821564	NA	NA
FRMPD1	ENSGALG00000023036	ENSACAG00000012188	N	N	N	0.129	0.0713571	0.205882	0.000875	0	0	0	0	NA	NA	NA	NA
FSD1L	ENSGALG00000015442	ENSACAG00000008495	N	N	N	0.156	0.306454	0.238812	0.180896	0	0	1	0.333333	1.41962	-0.0178454	0.649341	NA
FST	ENSGALG00000014908	ENSACAG00000015537	N	N	Y	0.818	0.242411	0.031347	0.2885	17	13.6667	13	9.33333	-2.05851	NA	NA	-1.79238
FUT10	ENSGALG00000015399	ENSACAG00000006003	N	N	N	0.054	0.45348	0.21684	0.0609167	0	0.333333	2	0	0.249307	1.31526	0.107674	NA
FXN	ENSGALG00000015108	ENSACAG00000001257	N	N	N	0.317	0.508221	NA	0.0210952	0	0	0	0	0.257403	1.94988	0.288813	0.723893
FYB	ENSGALG00000003792	ENSACAG00000026231	N	N	N	0.065	0.115588	0.547614	0.05165	0	0	0	0	0.453915	NA	4.28847	NA
GADD45G	ENSGALG00000028005	ENSACAG00000012182	N	N	N	0.402	0.233603	0.0661073	0.0584848	0	0.333333	2	0.5	0.168136	1.59587	0.171082	2.05211
GAK	ENSGALG00000015352	ENSACAG00000001376	N	N	N	0.208	0.475256	0.127504	0.163	0	0	0	0	1.70307	0.826368	0.0777713	0.982521
GALT	ENSGALG00000026195	ENSACAG00000006105	N	N	N	0.095	0.494598	0.0664934	0.0476	0	0.166667	0	0	-0.531648	-0.150806	0.238551	-1.17783
GAS1	ENSGALG00000017658	ENSACAG00000014344	N	N	Y	0.415	0.172671	0.151223	0.2095	10	3	10	3.33333	-0.73233	NA	-0.70634	NA
GBA2	ENSGALG00000002412	ENSACAG00000011497	N	N	N	0.098	0.415544	0.142876	0.266833	6	1.66667	0	0	-0.512403	-0.373652	-0.0526633	-0.770838
GCNT1	ENSGALG00000015166	ENSACAG00000005572	N	N	N	0.077	0.172709	0.0803405	0.117146	0	0	0	0	NA	NA	NA	NA
GCNT4	ENSGALG00000014944	ENSACAG00000008942	N	N	N	0.15	0.148724	0.127484	0.148887	0	0.166667	0	0	NA	NA	-0.276587	NA
GDA	ENSGALG00000015141	ENSACAG00000012708	N	N	N	0.395	0.112115	0.159298	0.0862564	0	0	0	0	NA	-0.691209	NA	NA
GDNF	ENSGALG00000003716	ENSACAG00000009822	N	N	Y	0.675	0.131282	0.199205	0.261606	13	4	12	3	NA	NA	NA	NA
GFM2	ENSGALG00000014939	ENSACAG00000009011	N	N	N	0.113	0.533963	0.162364	0.047	0	0	0	0.166667	-0.0422754	0.807424	0.233289	0.419982
GHR	ENSGALG00000014855	ENSACAG00000010633	N	Y	Y	0.408	0.16071	0.294973	0.15356	10	3.16667	6	1.83333	NA	NA	NA	NA
GIN1	ENSGALG00000015257	ENSACAG00000007110	N	N	N	0.121	0.440274	0.284101	0.0266522	0	0.333333	0	0	0.680946	1.37081	1.00678	1.99537
GKAP1	ENSGALG00000012586	ENSACAG00000001835	N	N	N	0.261	0.0764065	NA	0.122	0	0	2	0.5	1.5774	1.77648	0.55079	0.645476
GLDC	ENSGALG00000015053	ENSACAG00000004393	N	N	N	0.457	0.0938686	0.0442406	0.108444	4	0.666667	0	0	NA	0.576606	1.88525	0.468853
GLIS3	ENSGALG00000010180	ENSACAG00000003374	N	N	N	0.515	0.198971	0.388955	0.16387	0	0	5	1.5	NA	NA	-0.156399	NA
GLRX	ENSGALG00000027483	ENSACAG00000012936	N	N	N	0.075	0.156001	0.0257833	0.105882	0	0	0	0	1.67751	1.73364	1.86509	2.72212
GNA14	ENSGALG00000015176	ENSACAG00000028039	N	N	N	0.257	0.273791	NA	0.0292	0	0	0	0	NA	NA	NA	NA
GNAQ	ENSGALG00000015177	ENSACAG00000005913	N	Y	Y	0.423	0.494418	0.0596591	0.275981	31	12.1667	19	7.66667	1.17442	0.436712	1.11743	-0.24047
GNE	ENSGALG00000015331	ENSACAG00000001857	N	N	N	0.383	0.409516	0.0328208	0.138	0	0	0	0	0.236536	1.02921	-0.16883	-0.845251
GOLM1	ENSGALG00000012601	ENSACAG00000000371	N	N	Y	0.306	0.239755	0.445032	0.06185	0	0	0	0	NA	0.347522	-0.557232	NA
GOLPH3	ENSGALG00000028267	ENSACAG00000007801	Y	Y	Y	0.694	0.497887	0.0641695	0.2224	10	5	4	3	1.00046	1.02132	0.949265	2.93698
GPBP1	ENSGALG00000014724	ENSACAG00000014605	Y	Y	Y	0.793	0.394984	0.260476	0.173804	3	3.66667	7	2.66667	0.933328	0.885709	0.825404	0.644229
GPR98	ENSGALG00000014657	ENSACAG00000013431	N	N	N	0.066	0.059903	0.22679	0.00711111	1	0.166667	1	0.166667	NA	NA	NA	NA
GPX8	ENSGALG00000026704	ENSACAG00000015412	N	N	N	NA	0.298771	0.184665	0.0615652	0	0	0	0.166667	1.2678	NA	-0.126812	NA
GRAMD3	ENSGALG00000008237	ENSACAG00000003047	N	N	N	0.1	0.354108	0.259126	0.179105	0	0	0	0	0.681997	0.274395	0.112845	1.19189
GRHPR	ENSGALG00000005423	ENSACAG00000011898	N	N	N	0.103	0.348469	0.0509637	0.0762941	4	1.16667	3	0.666667	-1.42613	0.869985	1.06625	-0.673566
GRIN3A	ENSGALG00000015551	ENSACAG00000011011	N	N	N	0.352	0.170416	0.0497452	0.09	0	0.166667	0	0.166667	NA	NA	NA	NA
GRP	ENSGALG00000028564	NA	N	N	N	0.124	0.155554	0.362536	0.169333	0	0	0	0	NA	NA	NA	NA
GTF2H2	ENSGALG00000002399	ENSACAG00000010109	N	N	N	NA	0.365769	0.0808556	0	0	0	0	0	-0.768547	0.331682	0.817325	0.547204
GZMA	ENSGALG00000013548	ENSACAG00000015449	N	N	N	0.093	0.0933632	0.591898	NA	0	NA	0	0	NA	NA	NA	NA
GZMK	ENSGALG00000013546	NA	N	N	N	0.088	0.0696252	NA	0.022125	0	0	0	0	NA	NA	NA	NA
HABP4	ENSGALG00000012628	ENSACAG00000012890	N	N	N	0.158	0.335053	0.523633	0.177417	0	0	3	0.166667	1.15266	0.695672	-0.352728	NA
HAPLN1	ENSGALG00000015627	ENSACAG00000011432	N	N	Y	0.177	0.145006	0.0196672	0.300114	13	5	12	4.5	NA	-0.798927	NA	NA
HAUS1	ENSGALG00000001761	ENSACAG00000012652	N	N	N	NA	0.552394	0.755127	NA	0	NA	0	0	NA	NA	NA	NA
HAUS6	ENSGALG00000015091	ENSACAG00000010781	N	N	N	NA	0.332124	0.684649	0.05975	0	0	0	0	0.88553	1.25324	1.33019	NA
HCN1	ENSGALG00000014875	ENSACAG00000011205	N	N	N	0.502	0.119812	0.0622044	0.24175	14	8.16667	9	5.16667	NA	-1.49022	NA	NA
HDHD2	ENSGALG00000028168	ENSACAG00000012007	N	N	N	0.07	0.36581	0.0823872	0.0553478	1	1.16667	1	0.166667	NA	NA	NA	NA
HEMGN	ENSGALG00000023061	ENSACAG00000024269	N	N	N	0.111	0.0376061	NA	0.000666667	0	0	0	0	NA	NA	NA	NA
HEXB	ENSGALG00000014933	ENSACAG00000009147	N	N	N	0.195	0.445328	0.210986	0.03875	0	0	0	0	0.72361	0.861071	1.04292	0.959201
HINT1	ENSGALG00000000428	ENSACAG00000001424	Y	Y	Y	0.28	0.632107	0.0900693	0.002625	0	0.333333	0	0	0.229384	0.763177	0.659067	1.52773
HINT2	ENSGALG00000027418	ENSACAG00000003036	N	N	N	0.087	NA	0.0489609	0	0	0	0	0	-1.19495	NA	0.496786	0.24961
HMGCR	ENSGALG00000014948	ENSACAG00000008698	N	N	Y	0.879	0.359766	0.0594755	0.141125	1	0.833333	0	0	-0.460073	-0.590242	0.439828	1.02076
HMGCS1	ENSGALG00000014862	ENSACAG00000010737	N	N	Y	0.33	0.296932	0.038451	0.206758	1	2	0	0.333333	0.00630105	-0.925777	1.43791	2.32363
HNRNPK	ENSGALG00000012591	ENSACAG00000001479	Y	Y	Y	0.867	0.702422	NA	0.19344	5	6.5	5	4.83333	NA	NA	NA	NA
HOMER1	ENSGALG00000014813	ENSACAG00000016736	N	Y	Y	0.736	0.219792	0.0373778	0.203605	23	9.5	30	11.1667	NA	-1.1621	NA	NA
HOOK3	ENSGALG00000015390	ENSACAG00000005732	N	N	N	0.148	0.19996	0.0569801	0.209556	3	0.333333	3	1.16667	2.06906	0.498382	1.72168	NA
HSD17B3	NA	NA	N	N	N	0.12	0.10037	NA	0.0176	0	0	0	0	NA	NA	NA	NA
HSD17B4	ENSGALG00000002187	ENSACAG00000003796	N	N	N	0.585	0.374782	0.126528	0	0	0	0	0	1.10269	1.40975	0.999622	1.98476
HSDL2	ENSGALG00000015663	ENSACAG00000017353	N	N	N	0.277	0.440566	0.204527	0.00827778	0	0	0	0	0.535136	0.951404	1.76826	1.75585
HSPB3	ENSGALG00000014912	ENSACAG00000015513	N	N	N	0.147	0.0831651	0.285748	0.0403939	0	0	0	0	-0.181856	NA	NA	NA
HTR1A	ENSGALG00000014742	NA	N	N	N	0.441	0.0923168	0.0522453	0.00275	0	0	0	0	NA	NA	NA	NA
IDUA	ENSGALG00000015376	ENSACAG00000000308	N	N	N	0.072	0.278251	0.238469	0.00175	0	0	0	0	1.30824	0.42834	-0.255326	0.576498
IER3IP1	XM_004949020.1	NA	N	N	Y	0.249	0.178899	NA	0.0822	0	0	0	0	NA	NA	NA	NA
IFN1A	ENSGALG00000013245	ENSACAG00000027003	N	N	N	NA	NA	0.19976	NA	NA	NA	NA	NA	NA	NA	NA	NA
IFNB	ENSGALG00000005759	ENSACAG00000026778	N	N	N	NA	NA	0.226522	NA	NA	NA	NA	NA	NA	NA	NA	NA
IFNE	ENSGALG00000015062	ENSACAG00000017572	N	N	N	NA	0.106972	0.372931	0.0208043	0	0	0	0	NA	NA	NA	NA
IFT74	ENSGALG00000001801	ENSACAG00000028763	N	N	N	0.227	0.217017	0.22131	0.0392647	1	0.5	1	0.833333	2.25593	1.21087	1.60905	NA
IKBKAP	ENSGALG00000001947	ENSACAG00000003603	N	N	N	0.563	0.291753	0.228511	0.103947	0	0	0	0	0.901302	0.543193	0.499765	0.521724
IL11RA	ENSGALG00000005848	ENSACAG00000007445	N	N	N	0.363	0.460315	0.148152	0	0	0.166667	0	0	-1.01317	0.216075	NA	NA
IL31RA	XM_004937246.1	ENSACAG00000014938	N	N	N	0.046	0.0898247	NA	0.0036	0	0	0	0	NA	NA	NA	NA
IL6ST	ENSGALG00000014716	ENSACAG00000014810	N	N	Y	0.616	0.465729	0.253237	0.143615	6	4	4	4.66667	1.38291	1.24119	1.94998	1.13872
IL7R	ENSGALG00000013372	ENSACAG00000008906	N	N	N	0.509	0.0965887	0.294311	0.0237674	0	0	0	0	NA	NA	NA	NA
INIP	ENSGALG00000020528	ENSACAG00000017374	N	N	N	NA	0.531472	0.0784155	0.0815455	0	0	0	0	-0.118199	0.820192	1.32154	1.2433
IPO11	ENSGALG00000014740	ENSACAG00000008472	N	N	N	0.661	0.299405	0.106911	0.165429	0	0.333333	2	0.5	0.98935	0.717363	0.192432	0.559317
IQGAP2	ENSGALG00000014978	ENSACAG00000007992	N	N	N	0.477	0.210518	0.0841808	0.229889	7	1.66667	7	0.833333	NA	NA	NA	NA
ISCA1	ENSGALG00000012606	ENSACAG00000000369	N	N	Y	0.239	0.521817	0.138201	0.02275	0	0	0	0	0.554927	0.102851	0.105202	0.937486
ISL1	ENSGALG00000014884	ENSACAG00000004390	N	N	Y	0.381	0.136881	0.00885515	0.585083	17	8.83333	12	4	NA	NA	NA	NA
ISOC1	ENSGALG00000000161	ENSACAG00000001578	N	N	N	0.122	0.470396	0.0452331	0.0606	0	0.166667	0	0.166667	-0.224972	1.1286	0.519362	0.488819
ITGA1	ENSGALG00000014891	ENSACAG00000004092	N	N	N	0.414	0.262055	0.124481	0.103351	0	0	0	0.333333	NA	NA	NA	NA
ITGA2	ENSGALG00000014903	ENSACAG00000003947	N	N	N	0.251	0.218304	0.182225	0.101531	0	0	0	0	NA	1.17465	0.660556	NA
JAK2	ENSGALG00000015027	ENSACAG00000003673	N	N	N	0.948	0.220644	0.0667712	0.100571	1	0.833333	0	0.166667	-0.424664	0.646372	0.809936	0.364739
JMY	ENSGALG00000014819	ENSACAG00000016753	N	N	Y	NA	0.483824	0.175207	0.177508	8	2.66667	0	0	0.98975	0.167751	0.305869	NA
KANK1	ENSGALG00000010158	ENSACAG00000002270	N	N	N	0.53	0.310479	0.135719	0.330947	11	2.5	9	2.16667	-0.353572	1.18196	-0.00546127	0.951743
KATNAL2	ENSGALG00000001851	ENSACAG00000012057	N	N	N	0.14	0.222379	0.2159	0.0392667	0	0	0	0	NA	NA	NA	NA
KCMF1	ENSGALG00000015391	ENSACAG00000005906	Y	Y	Y	0.115	0.406077	0.0597652	0.193722	14	11.5	14	12.8333	0.735753	-0.376053	1.06385	1.23712
KCNN2	ENSGALG00000002539	ENSACAG00000007809	N	N	N	0.763	0.115756	0.279652	0.1265	4	5	7	6.5	NA	-0.152721	NA	NA
KCNV2	ENSGALG00000010173	ENSACAG00000003138	N	N	N	0.42	0.0467711	0.0754473	0	0	0	0	0	NA	NA	NA	NA
KDM4C	ENSGALG00000020557	ENSACAG00000004592	N	N	N	NA	0.211666	0.2519	0.0104286	0	1.83333	0	1	-0.00696406	0.646759	-0.0446698	-0.142153
KIAA0020	ENSGALG00000010178	ENSACAG00000003174	N	N	N	0.588	0.529493	0.176716	0.0184286	0	0	0	0	NA	NA	NA	NA
KIAA0368	ENSGALG00000015689	ENSACAG00000012678	N	N	N	0.283	0.251734	0.0923516	0.175053	4	1.16667	2	0.833333	0.973051	0.382387	0.0988628	0.684602
KIAA0825	ENSGALG00000014664	ENSACAG00000013284	N	N	N	NA	0.324156	0.251125	0.0339286	0	0	0	0	NA	NA	NA	NA
KIAA1024L	ENSGALG00000027692	ENSACAG00000001484	N	N	N	0.178	0.0911315	0.352133	0.0211053	0	0	0	0	NA	NA	NA	NA
KIAA1045	ENSGALG00000001900	ENSACAG00000016949	N	N	N	0.18	0.109107	0.0878162	0.145104	0	0	0	0	NA	NA	NA	NA
KIAA1161	ENSGALG00000005814	ENSACAG00000005959	N	N	N	0.198	0.30165	0.0175256	0.0875385	0	0	0	0.166667	0.418113	0.579877	-0.0333868	NA
KIAA1328	ENSGALG00000002419	ENSACAG00000012477	N	N	N	0.268	0.360669	0.467172	0.101	2	5.16667	2	3.5	NA	0.945027	NA	NA
KIAA1958	ENSGALG00000023083	ENSACAG00000017372	N	N	N	0.183	0.281703	0.133985	0.123225	7	1.83333	4	0.833333	NA	0.488627	NA	NA
KIAA2026	ENSGALG00000015050	ENSACAG00000004132	N	N	N	0.401	0.538304	0.402354	0.264077	12	3.5	8	2.16667	0.701054	0.323132	0.6227	NA
KIF24	ENSGALG00000005806	ENSACAG00000013024	N	N	N	0.406	0.0666747	0.344052	0.0131429	0	0.166667	0	0.333333	NA	NA	NA	NA
KIF27	ENSGALG00000012588	ENSACAG00000001735	N	N	N	0.065	0.120027	0.277001	0.0150833	0	0	0	0	NA	0.524209	-0.667048	NA
KIF2A	ENSGALG00000014737	ENSACAG00000008507	N	Y	Y	0.149	0.305685	0.0773085	0.226559	6	4.5	7	4.16667	0.289403	-0.41153	0.465959	NA
KLF4	ENSGALG00000026928	ENSACAG00000003706	N	N	N	0.827	0.158912	0.0555122	0.473636	23	7	21	6.66667	0.391504	NA	NA	NA
KLF9	ENSGALG00000027374	ENSACAG00000000916	N	N	N	0.994	0.323758	0.0510816	0.182812	10	3.66667	11	3.66667	0.623044	-0.315303	-0.261081	0.245317
LHFPL2	ENSGALG00000004437	ENSACAG00000012574	N	N	N	0.359	0.446983	0.0926966	0.182075	6	1.16667	0	0	NA	1.57095	1.44137	NA
LIFR	ENSGALG00000003733	ENSACAG00000009842	N	N	Y	0.617	0.361665	0.374878	0.204769	9	2.33333	0	0	1.39991	1.18854	0.59536	-0.832079
LINGO2	ENSGALG00000001869	ENSACAG00000010691	N	N	N	0.896	0.156717	0.0769779	0.1485	3	4.5	1	2.66667	NA	NA	NA	NA
LIPG	ENSGALG00000002712	ENSACAG00000017995	N	N	Y	0.147	0.0446308	0.108993	0.0573509	0	0	0	0	NA	NA	NA	NA
LIX1	ENSGALG00000015290	ENSACAG00000011917	N	N	N	0.155	0.192113	NA	0.0482	0	0	0	0	NA	NA	NA	NA
LMAN1	ENSGALG00000002805	ENSACAG00000007617	N	N	N	0.086	0.433285	0.0949561	0.155029	0	0	0	0	NA	NA	NA	NA
LMBRD2	ENSGALG00000013377	ENSACAG00000009051	N	N	N	0.141	0.469355	0.0457711	0.10498	0	0	0	0	0.492872	-0.132097	1.49904	0.734436
LMNB1	ENSGALG00000014692	ENSACAG00000002780	N	N	N	0.919	0.194682	0.133403	0.2206	6	1.33333	2	1	NA	0.976336	1.09018	0.0786771
LNPEP	ENSGALG00000015301	ENSACAG00000012000	N	N	N	0.071	0.398117	0.177241	0.195929	8	1.33333	11	2.33333	0.257908	0.0888558	0.360379	NA
LOX	ENSGALG00000028063	ENSACAG00000003698	N	N	Y	0.35	0.191084	0.0166472	0.186045	3	1.33333	0	0.166667	0.910205	NA	0.938455	NA
LOXHD1	ENSGALG00000001787	ENSACAG00000012527	N	N	N	0.143	0.0569885	1.55186	0.074	0	0	1	0	NA	NA	NA	NA
LPAR1	ENSGALG00000015729	ENSACAG00000001165	N	N	N	0.486	0.193928	0.00798669	0.115889	0	0.333333	0	0	2.2256	1.89947	-2.09782	NA
LPL	ENSGALG00000015425	ENSACAG00000013870	N	N	N	0.281	0.140721	0.126815	0.0750588	0	0.666667	0	0	-0.203395	NA	-1.38528	NA
LRRC19	ENSGALG00000026339	ENSACAG00000028864	N	N	N	0.051	0.0452697	0.612894	0.020625	0	0	0	0	NA	NA	NA	NA
LURAP1L	ENSGALG00000023301	ENSACAG00000011314	N	N	N	NA	0.32261	NA	0.172	0	0.5	0	0.5	NA	NA	NA	NA
LYRM7	ENSGALG00000023163	ENSACAG00000001420	N	N	N	0.079	0.516791	NA	0.0180952	0	0	0	0	NA	NA	NA	NA
LYSMD3	ENSGALG00000014651	ENSACAG00000013629	N	N	N	0.213	0.581217	0.385641	0.214143	1	1.5	0	1.5	0.470678	0.940193	1.24868	NA
MALT1	ENSGALG00000002872	ENSACAG00000010025	N	N	N	0.116	0.520453	0.252255	0.0442083	0	0	0	0	NA	NA	NA	NA
MAMDC2	ENSGALG00000015115	ENSACAG00000000946	N	N	N	0.196	0.244008	0.0953194	0.0846429	2	1.16667	3	1.16667	NA	NA	NA	NA
MAN2A1	ENSGALG00000000255	ENSACAG00000006965	N	N	N	0.398	0.364487	0.131886	0.228417	15	4.16667	11	2	1.50409	1.33531	1.24542	0.619366
MAP1B	ENSGALG00000014999	ENSACAG00000009855	N	Y	Y	0.898	0.204769	0.159849	0.252367	28	15	19	11.6667	NA	-0.340868	NA	NA
MAP3K1	ENSGALG00000014718	ENSACAG00000014703	N	N	Y	0.193	0.289688	0.0872507	0.369209	30	18.8333	27	13.6667	0.30104	0.750937	0.725405	-0.328681
MAPK4	NA	NA	N	N	N	NA	0.171677	NA	0.219095	0	0	1	1.66667	NA	NA	NA	NA
2017-03-03	ENSGALG00000028673	ENSACAG00000002759	N	N	N	0.681	0.2684	0.115537	0.247394	1	0.833333	8	2	0.504911	NA	0.358033	NA
MARVELD2	ENSGALG00000027140	NA	N	N	N	0.361	0.15039	0.160751	0.0385185	0	0	0	0	NA	NA	NA	NA
MAST4	ENSGALG00000014784	ENSACAG00000016206	N	N	N	0.208	0.319433	0.216087	0	21	7.16667	16	5.5	0.591393	0.0036214	1.29021	NA
MBLAC2	ENSGALG00000014649	ENSACAG00000013646	N	N	N	NA	0.3351	0.180098	0.211054	1	0.333333	1	0.166667	0.326894	0.44085	2.23749	NA
MCC	ENSGALG00000000208	ENSACAG00000007653	N	N	N	0.661	0.321266	0.0616036	0.110809	5	2.33333	8	2.33333	0.488179	1.1319	0.591117	-0.409367
MCCC2	ENSGALG00000002529	ENSACAG00000009948	N	N	N	0.032	0.412897	0.0598291	0.0579545	0	0	0	0	NA	NA	NA	NA
MCTP1	ENSGALG00000014668	ENSACAG00000013190	N	N	N	0.568	0.265568	0.155011	0.1796	5	3.16667	2	1.66667	NA	-1.49676	NA	NA
ME2	ENSGALG00000022329	ENSACAG00000010123	N	N	N	NA	0.54655	NA	0.0729	0	0	0	0.166667	NA	NA	NA	NA
MED18	ENSGALG00000028149	NA	N	N	N	NA	0.493383	0.0281278	0.0201176	0	0	0	0	NA	NA	NA	NA
MEF2C	ENSGALG00000014645	ENSACAG00000000488	N	N	Y	0.973	0.174046	0.144596	0.230561	31	27	21	17.8333	0.142528	-0.854737	1.76993	NA
MEGF10	ENSGALG00000014699	ENSACAG00000002614	N	N	N	0.075	0.188579	0.0468167	0.025875	4	2.16667	2	1.33333	NA	0.527324	NA	NA
MELK	ENSGALG00000027775	ENSACAG00000011531	N	N	N	0.453	0.0911672	0.0950337	0.0471064	0	2.33333	0	0	NA	NA	NA	NA
MEX3C	NA	NA	N	N	N	NA	0.136698	NA	0.046871	0	0	0	0	NA	NA	NA	NA
MFSD7	ENSGALG00000020538	ENSACAG00000000245	N	N	N	0.041	0.309043	0.198693	0	0	0	0	0.166667	NA	0.741839	-0.0560936	NA
MIER3	ENSGALG00000014721	ENSACAG00000028478	Y	Y	Y	0.422	0.336053	0.0979253	0.401104	45	23	40	17.1667	1.45856	1.22533	1.3407	0.610405
MLANA	ENSGALG00000019756	ENSACAG00000004131	N	N	N	0.113	0.0496856	0.346468	0.01015	0	0	0	0	NA	NA	NA	NA
MLLT3	ENSGALG00000015078	ENSACAG00000017614	N	N	N	0.431	0.387281	0.238994	0.237525	12	7.66667	16	6.66667	0.976043	0.589185	0.632673	NA
MOB3B	ENSGALG00000001856	ENSACAG00000010761	N	N	N	NA	0.210502	0.0573461	0.125587	0	0	3	0.5	NA	1.35959	0.68088	NA
MOCS2	ENSGALG00000014906	ENSACAG00000008027	N	N	Y	0.06	0.504838	0.170496	0.034025	3	2	0	0.833333	0.311583	0.951512	1.88371	0.848497
MPDZ	ENSGALG00000005846	ENSACAG00000011304	N	N	N	0.32	0.505098	0.324726	0.0329474	0	0.166667	1	0.333333	0.554748	1.08445	0.942698	NA
MRO	ENSGALG00000028488	NA	N	N	N	NA	0.202485	NA	0.0485385	0	0	0	0	NA	NA	NA	NA
MRPL17	ENSGALG00000002605	ENSACAG00000009480	N	N	N	NA	0.440941	0.000999573	0.0554746	0	0	0	0	0.663428	-0.0260202	0.858251	1.30831
MRPL50	ENSGALG00000015543	ENSACAG00000017435	N	N	N	0.164	0.465472	0.276991	0.0277	0	0	0	0	-0.326068	-0.29724	1.04649	1.44718
MRPS27	ENSGALG00000015002	ENSACAG00000009787	N	N	Y	0.046	0.668839	0.217432	0.0162105	0	0	0	0	-0.461719	-0.201342	0.327492	0.958386
MRPS30	ENSGALG00000014874	ENSACAG00000011165	N	N	N	0.277	0.637564	0.253456	0.0128148	0	0	0	0	-0.566229	0.0782174	1.5253	1.89151
MRPS36	ENSGALG00000014789	ENSACAG00000016447	N	Y	Y	0.103	0.502922	0.187735	0.118455	0	0	0	0	NA	NA	NA	NA
MSH3	ENSGALG00000015589	ENSACAG00000010533	N	N	N	0.486	0.583397	0.141852	0.0502927	0	0	0	0	0.148829	0.91382	1.46285	-0.390944
MSMP	ENSGALG00000028118	ENSACAG00000022796	N	N	N	NA	NA	0.0527649	0.277667	1	1	0	0	NA	NA	NA	NA
MTAP	ENSGALG00000008174	ENSACAG00000017549	N	N	N	0.143	0.455877	0.153479	0.0292222	0	0	0	0.333333	-0.871348	1.86306	1.9277	0.0173478
MTMR12	ENSGALG00000003168	ENSACAG00000007818	N	Y	Y	0.154	0.554438	0.100452	0.265979	3	1.5	0	0	0.610682	-0.43395	0.50383	-1.16208
MTX3	ENSGALG00000014807	ENSACAG00000016636	N	N	Y	0.259	0.507724	0.34394	0.146509	1	0	0	0	-0.0883018	-0.508471	0.987004	-0.0557399
MUSK	ENSGALG00000015728	ENSACAG00000000911	N	N	N	0.381	0.193968	0.0649455	NA	0	0	0	0	NA	NA	NA	NA
MYO5B	NA	NA	N	N	N	0.209	0.230279	NA	0.105289	0	0	0	0	NA	NA	NA	NA
NAA35	ENSGALG00000012598	ENSACAG00000000424	N	N	N	NA	0.401202	0.0220909	0.042283	0	0.5	0	0.166667	0.0269388	0.500322	0.920295	0.642465
NADK2	ENSGALG00000003558	ENSACAG00000009164	N	N	Y	NA	0.271099	0.128641	0.06125	0	0	0	0	-0.238258	0.910788	0.873434	-0.655634
NAIP	NA	NA	N	N	N	0.276	0.156432	NA	0.00515789	0	0	0	0	NA	NA	NA	NA
NANS	ENSGALG00000015320	ENSACAG00000002054	N	N	N	0.155	0.251848	0.0566542	NA	NA	NA	0	0	0.642159	0.727469	0.371848	1.97077
NARS	ENSGALG00000003087	ENSACAG00000009539	N	N	N	0.426	0.611084	0.0383082	0.0367188	0	0	0	0	NA	NA	NA	NA
NCBP1	ENSGALG00000002087	ENSACAG00000004409	N	N	N	0.073	0.547446	0.0118577	0.0521613	0	0	0	0	1.18018	0.52386	0.0460853	-0.865281
NDUFAF2	ENSGALG00000027564	ENSACAG00000008879	N	N	N	0.014	0.606644	0.199632	NA	2	0.5	0	1	0.348625	0.65312	1.22354	1.92639
NDUFS4	ENSGALG00000028026	ENSACAG00000015523	N	N	N	0.333	0.644896	0.242305	0.3035	3	2.16667	3	2.16667	0.277371	1.27694	1.0073	0.427703
NEDD4L	ENSGALG00000002917	ENSACAG00000009877	Y	Y	Y	0.378	0.328084	0.030152	0.245755	14	4.66667	7	3	NA	NA	NA	NA
NFIB	ENSGALG00000005441	ENSACAG00000017798	N	N	N	0.92	0.410457	0.0519654	0.331896	61	49.5	60	44.6667	0.378402	0.113868	0.188101	-0.167348
NFIL3	ENSGALG00000015209	ENSACAG00000000915	N	Y	Y	0.263	0.335659	0.0498828	0.155889	5	2.33333	5	2.83333	2.45853	0.309768	-0.0920107	4.53427
NIM1K	ENSGALG00000014861	ENSACAG00000010721	N	N	N	NA	0.226038	0.174381	NA	NA	NA	NA	NA	NA	NA	NA	NA
NIPBL	ENSGALG00000003605	ENSACAG00000009312	Y	Y	Y	0.905	0.576917	0.0761378	0.3535	34	27.8333	32	26.3333	1.3216	1.10987	1.25714	0.336126
NIPSNAP3A	ENSGALG00000027334	ENSACAG00000028397	N	N	N	0.077	0.537295	NA	0.0615455	0	0	0	0	-0.0887939	0.551019	0.932867	NA
NLN	ENSGALG00000014769	ENSACAG00000015913	N	N	N	0.302	0.441809	0.0977225	0.112562	0	0	0	0	-0.54842	0.491181	1.75775	NA
NMRK1	ENSGALG00000015156	ENSACAG00000005328	N	N	N	NA	0.390387	0.241452	0.0245833	0	0	0	0	1.83926	1.1901	0.72845	0.701863
NNT	ENSGALG00000014869	ENSACAG00000010913	N	N	N	0.291	0.296582	0.0672409	0.0696176	0	0	2	1	-0.959672	-0.0420571	0.987749	0.570441
NOL6	ENSGALG00000014168	ENSACAG00000000983	N	N	Y	0.205	0.420995	0.129801	0.0319524	0	0	0	0	NA	NA	NA	NA
NPR2	ENSGALG00000027630	NA	N	N	N	0.161	0.259221	0.0328038	0.0486667	0	0	0	0	NA	NA	NA	NA
NPR3	ENSGALG00000017405	ENSACAG00000001580	N	N	N	0.644	0.0727119	0.0516737	0.084566	2	2	0	0	-2.38822	NA	0.026458	NA
NR2F1	ENSGALG00000027907	ENSACAG00000013324	N	N	N	0.749	0.307559	0.0368113	0.0893333	3	6.83333	2	4.33333	NA	-0.965884	0.114936	-0.797632
NREP	ENSGALG00000000236	NA	N	N	N	NA	0.0688794	NA	0.321778	24	16	24	13.6667	NA	NA	NA	NA
NRG1	ENSGALG00000015422	ENSACAG00000007554	N	N	N	0.893	0.272133	0.188618	0.175	23	16.8333	17	12.8333	NA	-1.37485	0.977579	NA
NSA2	ENSGALG00000014942	ENSACAG00000008969	N	N	N	NA	0.631226	0.0288656	0.0144118	0	0	0	0	0.56341	1.05257	1.38296	0.320687
NTRK2	ENSGALG00000012594	ENSACAG00000000978	N	N	Y	0.34	0.190036	0.0957481	0.02775	20	12.6667	14	7	NA	0.998679	-1.38438	NA
NUDT12	ENSGALG00000015268	ENSACAG00000006752	N	N	N	0.068	0.563672	0.225522	0.0179583	0	0	0	0	0.519525	0.928833	2.27826	1.67451
NUDT2	ENSGALG00000027295	ENSACAG00000013079	N	N	Y	0.085	0.59975	0.0783906	0.053	0	0	0	0	0.374639	1.61681	-0.0878014	0.775245
NUP155	ENSGALG00000003688	ENSACAG00000024819	N	N	N	0.939	0.12143	0.0627803	0.04564	0	0	0	1.33333	0.749503	0.606716	0.318086	0.742151
NXNL2	ENSGALG00000026598	ENSACAG00000016534	N	N	N	0.122	0.245416	0.0265601	0.1932	1	0.333333	0	0	NA	NA	NA	NA
OCLN	ENSGALG00000027456	ENSACAG00000022344	N	N	N	0.332	0.156769	NA	0.0686471	0	0	0	0	NA	NA	NA	NA
ONECUT2	ENSGALG00000027116	ENSACAG00000009410	N	N	N	0.099	0.112249	0.0316763	0.328945	37	27	37	28.1667	NA	NA	NA	NA
OSMR	ENSGALG00000003747	ENSACAG00000009942	N	N	N	0.139	0.394993	0.57058	0.124633	0	0	0	0	2.93602	1.31985	1.42477	NA
OSTF1	ENSGALG00000017447	ENSACAG00000005379	N	N	Y	0.127	0.318681	0.0414557	0.07335	0	0	0	0.166667	0.646867	0.73888	0.183567	0.655434
OTP	ENSGALG00000026744	ENSACAG00000007695	N	N	N	0.187	0.0341349	0.0131068	0.2944	3	4.33333	4	4.83333	NA	NA	NA	NA
OXCT1	ENSGALG00000014846	ENSACAG00000010461	N	N	N	0.084	0.382481	0.154268	0.0598125	0	0	0	0	-2.12037	-0.372064	-0.185809	NA
PAIP1	ENSGALG00000014867	ENSACAG00000010867	N	N	N	0.509	0.660264	0.190873	0.215118	4	1.66667	3	1	0.0607913	0.801544	0.58	1.00161
PALM2	ENSGALG00000015655	ENSACAG00000017414	N	Y	Y	NA	NA	NA	0.252114	21	5.33333	19	3.33333	NA	NA	NA	NA
PALM2-AKAP2	ENSGALG00000015656	ENSACAG00000017412	N	N	N	NA	NA	0.227889	0.163275	5	3.33333	4	0.833333	0.23619	NA	NA	NA
PAM	ENSGALG00000015256	ENSACAG00000006978	N	N	N	0.481	0.110151	0.159409	0.209692	11	5.16667	10	4	-0.0137194	-0.252751	-0.270317	0.932952
PAPD4	ENSGALG00000014810	ENSACAG00000016683	N	N	N	0.162	0.587069	0.34253	0.202684	3	1.16667	3	0.833333	0.428225	1.00397	1.23156	0.967112
PARP8	ENSGALG00000014880	ENSACAG00000004471	N	N	Y	0.287	0.254448	0.064624	0.223878	9	8.33333	6	4.5	NA	NA	NA	NA
PAX5	ENSGALG00000016431	ENSACAG00000011646	N	N	N	0.484	0.0429343	0.0521708	0.246632	12	6.33333	12	6	NA	NA	NA	NA
PCGF3	ENSGALG00000015333	ENSACAG00000000236	N	N	Y	0.158	0.413815	0.0285605	0.275725	16	6.16667	9	3.5	0.842922	0.512424	0.14941	NA
PCSK1	ENSGALG00000014681	ENSACAG00000012731	N	N	N	0.29	0.0765712	0.0930356	0.0642273	3	1.66667	1	1	NA	-1.24473	NA	NA
PCSK5	ENSGALG00000015164	ENSACAG00000005525	N	Y	Y	0.105	0.277593	0.189189	0.246906	12	6.16667	9	4.16667	NA	NA	NA	NA
PDE4D	ENSGALG00000014727	ENSACAG00000009088	N	Y	Y	0.212	0.181568	0.0708042	0.379391	29	16.6667	26	14.3333	1.21519	-0.438087	0.575408	NA
PDE6B	ENSGALG00000015373	ENSACAG00000000577	N	N	N	0.529	0.211768	0.0513223	0	0	0	0	0	NA	NA	NA	NA
PDE8B	ENSGALG00000004339	ENSACAG00000007748	N	N	N	0.462	0.110698	0.0944099	0.223657	5	0.666667	2	0.5	NA	0.501372	NA	NA
PDZD2	ENSGALG00000002854	ENSACAG00000007750	N	N	N	0.097	0.239121	0.484426	0.153697	3	0.333333	2	0.166667	NA	NA	NA	NA
PELO	ENSGALG00000014891	ENSACAG00000004352	N	N	N	0.298	0.420291	NA	0.0332391	0	0	0	0	NA	NA	NA	NA
PGGT1B	ENSGALG00000008197	ENSACAG00000007988	N	N	N	0.482	0.605403	0.15757	0.206905	2	1.16667	3	0.666667	-0.457673	0.361855	1.47584	0.879034
PGM5	ENSGALG00000014995	ENSACAG00000001410	N	N	N	0.428	0.179852	0.0363991	0.0307059	0	1.33333	0	0.166667	0.766138	-0.536944	0.834389	NA
PHAX	ENSGALG00000014691	ENSACAG00000002878	N	N	N	NA	0.481949	0.0814536	0.102327	0	0	4	2.5	0.396346	0.75503	1.3083	1.18831
PIAS2	ENSGALG00000001843	ENSACAG00000012084	N	N	Y	0.978	0.173715	0.0512754	0.0680167	0	0.166667	1	0	NA	NA	NA	NA
PIGG	ENSGALG00000015349	ENSACAG00000001731	N	N	N	0.177	0.55871	0.138556	0.01776	1	4.33333	6	4	1.5854	1.39019	-0.330019	0.334575
PIGO	ENSGALG00000002023	ENSACAG00000011686	N	N	N	0.259	0.411123	0.182212	0.0233913	0	0	0	0	0.100257	1.00862	0.461129	NA
PIK3C3	ENSGALG00000008887	ENSACAG00000013961	N	N	N	0.627	0.372639	0.0490294	0.0179194	0	0	0	0	NA	NA	NA	NA
PIK3R1	ENSGALG00000014786	NA	N	N	N	0.894	0.291061	0.0620403	0.253745	15	9.66667	11	5.83333	NA	NA	NA	NA
PIP5K1B	ENSGALG00000015107	ENSACAG00000001281	N	N	N	0.18	0.203506	0.0820513	0.150312	14	2.83333	14	3.5	-0.00884096	0.106439	-0.654258	NA
PJA2	ENSGALG00000000264	ENSACAG00000006938	N	N	N	0.273	0.419283	0.477048	0.148185	0	0.166667	0	0.833333	1.32375	-0.342998	1.01052	0.956308
PLAA	ENSGALG00000001782	ENSACAG00000017506	N	N	N	0.137	0.412025	0.11329	0.115425	0	0.166667	3	0	0.420444	-0.0134648	1.01801	0.912144
PLCXD3	ENSGALG00000014845	ENSACAG00000010454	N	N	N	0.276	0.159165	0.0686432	0.197962	6	1.66667	0	0.833333	NA	-0.93172	NA	NA
PLGRKT	NA	NA	N	N	N	NA	0.459771	NA	0.048775	0	0	0	0	NA	NA	NA	NA
PLIN2	ENSGALG00000015090	ENSACAG00000017672	N	N	N	NA	0.170831	0.226266	0.0285714	0	0	0	0	2.34686	1.76368	1.27713	3.05158
PLK2	ENSGALG00000014725	ENSACAG00000009334	N	Y	Y	0.275	0.247039	0.0373582	0.303667	5	2.66667	6	1.66667	-0.367426	0.0272327	0.256414	0.603811
POC5	ENSGALG00000014960	ENSACAG00000008393	N	N	N	NA	0.251309	0.354512	0.0015	0	0	0	0	0.933319	1.13172	1.17307	NA
POLI	NA	NA	N	N	N	NA	0.330715	NA	0.0212632	0	0	0	0	NA	NA	NA	NA
POLK	ENSGALG00000014956	ENSACAG00000008458	N	N	N	0.122	0.53364	0.299815	0.0399333	0	0.333333	0	0	1.16013	1.359	2.20191	1.08392
POLR1E	ENSGALG00000005395	NA	N	N	N	0.63	0.552187	0.114507	0.031	0	0	0	0	NA	NA	NA	NA
POLR3G	ENSGALG00000014650	NA	N	N	N	0.265	0.292689	NA	0.1943	0	0	0	0	NA	NA	NA	NA
PPAP2A	ENSGALG00000014711	ENSACAG00000015109	N	N	N	0.544	0.391031	0.162022	0.495667	3	0.5	3	1.83333	NA	NA	NA	NA
PPIC	ENSGALG00000005346	ENSACAG00000003427	N	N	N	0.115	0.359902	0.0755479	0.0594103	0	0	0	0	0.318467	1.63904	1.1551	0.955063
PPIP5K2	ENSGALG00000015264	ENSACAG00000007146	N	N	N	NA	0.435017	0.0701457	0.125803	0	0	0	0	0.986456	-0.0126371	1.72692	1.37667
PPWD1	ENSGALG00000014756	ENSACAG00000015772	N	N	N	0.324	0.538963	0.0184491	0.0160455	0	0	0	0	0.670167	1.41384	1.16128	0.559897
PRDM6	ENSGALG00000005351	ENSACAG00000003401	N	N	N	0.292	0.12266	0.0451293	0.104468	11	6.5	9	4.83333	NA	NA	NA	NA
PRKAA1	ENSGALG00000014832	ENSACAG00000010236	N	Y	Y	0.88	0.459829	0.023657	0.158182	3	0.166667	5	1	1.24805	0.582203	1.59082	1.23417
PRKACG	NA	NA	N	N	N	0.706	0.0318006	NA	0.0304286	0	0	0	0.333333	NA	NA	NA	NA
PRLR	ENSGALG00000003446	ENSACAG00000008737	N	N	N	0.07	0.130885	0.395883	0.101471	8	1.83333	1	0	NA	NA	1.52725	NA
PRR16	ENSGALG00000002183	ENSACAG00000003793	N	N	N	0.148	0.28391	0.129965	0.266333	4	0.5	4	1.83333	NA	NA	NA	NA
PRRC1	ENSGALG00000014703	ENSACAG00000012694	N	N	N	0.1	0.52108	0.243978	0.151286	2	1.33333	1	0.333333	0.437163	0.817517	1.2897	1.17133
PRUNE2	ENSGALG00000015167	ENSACAG00000005636	N	N	N	0.063	0.2355	0.428268	0.174407	0	0	0	0	NA	0.418819	1.3487	NA
PSAT1	ENSGALG00000015180	ENSACAG00000006074	N	N	N	NA	0.276725	0.107239	0.0950769	0	0	0	0	NA	1.51788	1.54418	0.198666
PSD3	ENSGALG00000015428	ENSACAG00000014078	N	N	N	0.527	0.112983	0.259088	0.188803	4	2.83333	1	1	NA	-0.833989	NA	NA
PSIP1	ENSGALG00000015105	ENSACAG00000017757	N	N	N	0.989	0.24751	0.257218	0.169857	0	0	1	0.833333	1.50348	0.492178	0.459567	-0.354999
PSTPIP2	ENSGALG00000001745	ENSACAG00000012789	N	N	N	0.08	0.112429	0.0989072	0.0845652	0	0	0	0	NA	NA	NA	NA
PTAR1	ENSGALG00000015113	ENSACAG00000027513	N	N	N	0.209	0.50981	0.181844	0.20629	4	1	2	0.166667	1.00629	0.926158	1.53168	NA
PTBP3	ENSGALG00000015669	ENSACAG00000017316	N	N	N	NA	0.411731	0.49755	0.16958	16	6.83333	15	8.66667	1.93519	-0.0701695	0.641521	NA
PTCD2	BX931054.1	ENSACAG00000009747	N	N	N	0.026	0.534714	NA	0.00461702	0	0	0	0.5	NA	NA	NA	NA
PTCH1	ENSGALG00000012620	ENSACAG00000012983	N	N	N	0.568	0.170577	0.122473	0.169976	21	11.5	15	10.6667	1.0602	0.757254	0.00209354	NA
PTGER4	ENSGALG00000014824	ENSACAG00000010213	N	N	Y	0.119	0.329241	0.0886564	0.101158	5	1.83333	2	0.166667	NA	NA	-0.285014	NA
PTGR1	ENSGALG00000015702	ENSACAG00000012995	N	N	N	NA	0.205359	0.168564	0.0055	0	0	0	0.166667	0.337285	-0.638121	-0.135218	0.948671
PTPLAD2	ENSGALG00000026274	ENSACAG00000028887	N	N	N	0.133	0.35491	NA	0.00565455	0	0.333333	0	0	NA	NA	NA	NA
PTPRD	ENSGALG00000015058	ENSACAG00000004644	N	N	N	0.838	0.142333	0.0201982	0.481308	37	22.3333	42	25.5	0.685913	0.654893	NA	NA
PTPRK-like	ENSGALG00000021355	NA	N	N	N	NA	NA	0.231243	NA	NA	NA	NA	NA	NA	NA	NA	NA
RAB27B	NA	NA	N	N	N	NA	0.230899	NA	0.0826981	0	0	0	0.333333	NA	NA	NA	NA
RAB3C	ENSGALG00000014726	NA	N	N	N	0.499	0.137394	0.0725727	0.147443	8	4	8	2.33333	NA	NA	NA	NA
RAD1	ENSGALG00000003365	ENSACAG00000008562	N	N	N	0.347	0.541163	0.11907	0.0232273	0	0	0	0	0.537255	0.445705	0.746685	1.29478
RAD17	ENSGALG00000015571	ENSACAG00000010254	N	N	N	0.404	0.201757	0.319731	0.152	0	0	0	0	-0.0544573	0.946979	0.527799	-0.373015
RAD23B	ENSGALG00000015540	ENSACAG00000003607	N	N	N	0.612	0.525454	0.224929	0.322267	7	3.83333	12	4	0.234814	0.24951	0.581527	-0.720913
RAI14	ENSGALG00000003353	ENSACAG00000008462	N	N	Y	0.197	0.34736	0.279932	0.252281	5	2	4	1.16667	1.16179	1.18556	0.700528	-1.58658
RANBP3L	ENSGALG00000021304	ENSACAG00000009233	N	N	Y	0.138	0.218738	NA	0.015	0	0	0	0	NA	0.692684	-0.607861	NA
RASA1	ENSGALG00000017706	ENSACAG00000000769	Y	Y	Y	0.694	0.531649	0.0196928	0.256568	18	4.33333	14	3.83333	0.616522	-0.0398525	0.870081	0.181943
RASEF	ENSGALG00000012576	ENSACAG00000002155	N	N	Y	0.083	0.169728	0.107554	0.0998571	0	0	0	0	NA	NA	1.37296	NA
RASGRF2	ENSGALG00000015598	ENSACAG00000010696	N	N	N	0.161	0.217288	0.0247237	0.138234	6	1.33333	3	1	NA	-0.439241	NA	NA
RAX	ENSGALG00000025954	ENSACAG00000007597	N	N	N	0.23	0.0392688	0.0893754	0.0113571	3	3.33333	3	1.5	NA	NA	NA	NA
RBP4	ENSGALG00000015374	ENSACAG00000000576	N	Y	Y	NA	0.0480862	0.0156649	0.0277826	0	0	0	0	NA	NA	NA	NA
RCL1	ENSGALG00000015024	ENSACAG00000003640	N	N	N	0.473	0.328524	0.223861	0.0157273	0	0	0	0	0.652262	0.814575	0.218123	-0.843347
REEP5	ENSGALG00000023157	ENSACAG00000007552	N	N	N	0.239	0.423628	0.0708716	0.0259259	8	3.5	5	3.66667	-0.197812	-0.368567	0.0944023	1.07419
RFESD	ENSGALG00000014673	ENSACAG00000013011	N	N	N	0.081	0.11072	NA	0.0254615	1	1	0	0.833333	0.770006	0.235651	1.36045	1.44452
RFK	ENSGALG00000000004	ENSACAG00000005559	N	N	Y	0.058	0.326164	0.170711	0.0234737	0	0	0	0	0.632226	-0.126131	1.19985	1.02909
RFX3	ENSGALG00000010179	ENSACAG00000003262	N	Y	Y	0.934	0.366555	0.033244	0.350463	35	26.5	27	22.5	NA	-0.554552	NA	NA
RGMB	ENSGALG00000015284	ENSACAG00000011827	N	Y	Y	0.129	0.190521	0.298928	0.211469	8	3.33333	10	3.5	0.892181	-0.353498	-0.617792	NA
RGP1	ENSGALG00000002394	NA	N	N	N	0.16	0.61559	0.0474924	0.102347	2	3.5	1	1.5	NA	NA	NA	NA
RGS7BP	ENSGALG00000027389	ENSACAG00000015618	N	N	Y	0.527	0.165946	0.0451455	0.188822	0	1.33333	1	2.66667	NA	-1.83966	NA	NA
RHOBTB3	ENSGALG00000014675	ENSACAG00000012942	N	N	N	0.186	0.421966	0.106475	0.0564878	0	0	0	0	NA	1.37595	NA	NA
RIC1	ENSGALG00000015036	ENSACAG00000003988	N	N	N	NA	NA	0.0872253	NA	NA	NA	NA	NA	0.983932	-0.0745576	0.538312	0.699201
RICTOR	ENSGALG00000003775	ENSACAG00000009960	N	N	Y	NA	0.422043	0.0490448	0.291725	26	10.5	17	7.16667	1.14736	0.665542	1.11193	NA
RIOK2	ENSGALG00000015288	ENSACAG00000011858	N	N	N	0.592	0.683487	0.293562	0.0179412	0	0	0	0	0.523955	0.979639	1.05316	1.76757
RIT2	ENSGALG00000026924	ENSACAG00000014082	N	N	N	0.888	0.0686408	0.0677328	0.132	0	0.5	0	0	NA	NA	NA	NA
RLN3	ENSGALG00000015028	ENSACAG00000015658	N	N	N	0.13	0.0821049	0.559088	NA	0	0	1	1	NA	NA	NA	NA
RMI1	ENSGALG00000012592	ENSACAG00000001474	N	N	Y	0.66	0.370532	0.352032	0.00554545	0	0	0	0	NA	NA	NA	NA
RNF165	ENSGALG00000001766	ENSACAG00000012611	N	N	Y	0.132	0.121674	0.0429836	0.240661	25	18	23	16.1667	NA	NA	NA	NA
RNF170	ENSGALG00000015386	ENSACAG00000005721	N	N	N	0.149	0.37408	0.0682361	0.100733	1	0.5	1	0.333333	0.242013	0.75843	0.89171	-0.43987
RNF180	ENSGALG00000014743	ENSACAG00000015602	N	N	N	0.341	0.303502	0.409113	0.163781	0	0	0	0	0.915291	-0.170074	NA	NA
RNF20	ENSGALG00000015548	ENSACAG00000014960	N	N	N	0.125	0.603177	0.026179	0.0751837	0	0.166667	0	0	0.91169	1.19767	0.708892	-0.0463021
RNF38	ENSGALG00000015311	ENSACAG00000002163	N	Y	Y	0.464	0.248906	0.21613	0.422846	22	13	23	12.3333	0.951488	-0.468403	0.492389	-0.811598
ROR2	ENSGALG00000015208	ENSACAG00000000922	N	N	Y	0.158	0.193981	0.0224281	0.061	0	0.166667	0	0.333333	NA	NA	NA	NA
RORB	ENSGALG00000015150	ENSACAG00000005205	N	N	Y	0.765	0.155109	0.0403628	0.320113	28	15.5	25	13	NA	NA	NA	NA
RP11-35N6.1	ENSGALG00000015542	ENSACAG00000017418	N	N	N	NA	NA	0.0247826	NA	NA	NA	NA	NA	NA	NA	NA	NA
RP11-65F13.3	NA	NA	N	N	N	NA	NA	NA	NA	NA	NA	NA	NA	NA	NA	NA	NA
RPL17	ENSGALG00000002696	ENSACAG00000017998	Y	Y	Y	0.276	0.606718	0	0.0595	0	0	0	0	NA	NA	NA	NA
RPL37	ENSGALG00000014833	ENSACAG00000010291	N	Y	Y	0.614	0.565197	0.0271973	0.030375	1	0.833333	0	1.33333	0.344496	1.46403	-0.220533	-0.152488
RPP25L	ENSGALG00000005833	ENSACAG00000006073	N	N	N	NA	0.400723	NA	0.075	0	0	0	0	NA	NA	NA	NA
RPS23	ENSGALG00000015617	ENSACAG00000011136	N	N	Y	0.988	0.586413	0.000988451	0.0132059	1	1.5	1	1.16667	0.817618	1.3839	0.00617532	0.494632
RPS6	ENSGALG00000015082	ENSACAG00000017634	N	N	N	NA	0.50748	0.0095171	0.0260667	2	1.66667	0	1.5	1.38342	1.86425	0.0788152	0.841114
RUSC2	ENSGALG00000002371	ENSACAG00000013712	N	N	Y	0.103	0.363161	0.173311	0.299	0	0	0	0	1.18503	-0.190651	NA	NA
RXFP3	ENSGALG00000017411	NA	N	N	N	0.046	0.0528038	0.0999169	0.0264167	0	0	0	0	NA	NA	NA	NA
S100Z	ENSGALG00000014989	ENSACAG00000007976	N	N	N	0.092	0.118475	0.166852	0.0464545	0	0	0	0	NA	NA	NA	NA
S1PR3	ENSGALG00000010683	ENSACAG00000016536	N	N	N	0.102	0.153565	0.120836	0.0595294	0	0	0	0	NA	NA	NA	NA
SCAMP1	ENSGALG00000004425	ENSACAG00000012476	N	N	Y	0.902	0.40597	0.0159216	0.110122	2	0.666667	2	1	0.731625	-0.231103	0.582702	0.495583
SEC11C	ENSGALG00000002839	ENSACAG00000007564	N	N	N	0.269	0.305818	0.00943396	0.0185	0	0.666667	0	0	NA	NA	NA	NA
SECISBP2	ENSGALG00000010694	ENSACAG00000016594	N	N	N	0.078	0.395191	0.574478	0.0935385	0	0	0	0	1.17484	0.552467	0.781948	0.00873761
SEMA4D	ENSGALG00000010697	ENSACAG00000016619	N	N	N	0.19	0.129184	0.123347	0.0998261	1	3.66667	1	2.33333	0.704097	1.45456	-0.340566	NA
SEMA6A	ENSGALG00000002294	ENSACAG00000008169	N	N	N	0.463	0.227748	0.0684111	0.290395	25	7.16667	10	5.66667	0.653501	0.831182	0.354312	NA
SEPP1	ENSGALG00000014857	ENSACAG00000026650	N	Y	Y	0.18	0.210881	0.268284	0.0125	0	1.5	1	1.66667	NA	NA	NA	NA
SERF1A	ENSGALG00000021397	ENSACAG00000003491	N	N	Y	NA	0.341707	0.0359723	0.00213636	0	0	1	1.66667	NA	NA	NA	NA
SERINC5	ENSGALG00000014798	ENSACAG00000016493	N	N	N	0.131	0.321969	0.113656	0.176905	0	0	0	0	0.128501	1.64427	-0.127278	-0.702862
SETBP1	ENSGALG00000001677	ENSACAG00000013045	N	N	Y	0.649	0.364396	0.170434	0.181514	17	12.3333	15	5	NA	NA	NA	NA
SETD9	ENSGALG00000014719	ENSACAG00000014688	N	N	N	NA	0.136624	0.233374	0.190968	8	8.16667	4	5	0.461395	0.672585	1.293	-0.252381
SGTB	ENSGALG00000014768	ENSACAG00000015873	N	Y	Y	0.24	0.24136	0.156528	0.157674	0	0.5	0	0.166667	0.468989	-0.446044	1.31883	NA
SH3GL2	ENSGALG00000015096	ENSACAG00000017719	N	N	N	0.266	0.0797488	0.0324654	0.134591	4	3.33333	4	2.83333	0.154776	-1.23123	NA	NA
SHB	ENSGALG00000026811	ENSACAG00000013640	N	N	N	0.286	0.411601	0.669897	0.0814146	0	0	2	0.833333	0.504422	1.32346	-1.27541	1.20196
SHC3	ENSGALG00000010688	NA	N	N	N	0.381	0.159986	0.297766	0.142719	1	1	1	0.333333	NA	NA	NA	NA
SIGLEC15	ENSGALG00000021416	ENSACAG00000012950	N	N	N	0.14	0.0767438	0.0931545	0.009	0	0	0	0	NA	NA	NA	NA
SIGMAR1	ENSGALG00000028996	ENSACAG00000006081	N	N	N	NA	0.443011	0.0317927	0.151786	0	0	0	0	0.214566	-0.301297	0.440321	-0.789194
SKA1	NA	NA	N	N	N	NA	0.0817173	NA	0.014	0	0	0	0	NA	NA	NA	NA
SKIV2L2	ENSGALG00000014709	ENSACAG00000015200	N	N	N	0.524	0.526011	0.110076	0.0724	0	0.333333	1	1.33333	0.829559	1.66712	1.13624	1.71409
SKOR2	ENSGALG00000001867	ENSACAG00000006146	N	N	N	NA	0.047757	0.0908475	NA	NA	NA	NA	NA	NA	NA	NA	NA
SKP2	ENSGALG00000003547	ENSACAG00000009107	N	N	N	0.83	0.479132	0.246176	0.0718333	0	0	0	0	-0.221994	0.910509	0.786913	-1.60299
SLC12A2	ENSGALG00000014690	ENSACAG00000002415	N	N	N	0.185	0.298473	0.083061	0.256563	23	7.66667	16	6.66667	1.27973	0.889543	1.51529	NA
SLC14A1	ENSGALG00000001705	ENSACAG00000012956	N	N	N	0.049	0.122437	0.426617	0.0544667	0	0	0	0	NA	NA	NA	NA
SLC16A7-like	ENSGALG00000015045	NA	N	N	N	NA	NA	0.298643	NA	NA	NA	NA	NA	NA	NA	NA	NA
SLC1A1	ENSGALG00000010187	ENSACAG00000003433	N	N	N	0.293	0.257606	0.136031	0.247241	3	0.333333	0	0	NA	-0.383171	NA	NA
SLC1A3	ENSGALG00000003582	ENSACAG00000009253	N	Y	Y	0.24	0.197259	0.0617233	0.0564231	0	2	0	1	NA	1.07566	0.0169278	NA
SLC24A2	ENSGALG00000015080	ENSACAG00000017625	N	N	N	0.216	0.178897	0.167219	0.189881	2	1.16667	0	0	NA	0.124962	NA	NA
SLC25A46	ENSGALG00000000253	ENSACAG00000007092	N	N	N	0.155	0.423254	0.0653234	0.0262564	0	0.166667	0	0	0.212907	-0.223156	1.46678	0.680938
SLC25A51	ENSGALG00000028340	ENSACAG00000012131	N	Y	Y	NA	0.616845	0.00150466	0.154111	0	0	0	0	-0.444864	-0.46899	0.201279	0.928763
SLC26A1	ENSGALG00000027423	ENSACAG00000000532	N	N	N	0.129	0.320075	0.249031	0.0345	0	0	1	0.666667	NA	-1.61132	0.236414	NA
SLC27A6	ENSGALG00000000184	ENSACAG00000001614	N	N	N	0.046	0.202231	0.160085	0	0	0	0	0.166667	NA	NA	NA	NA
SLC28A3	ENSGALG00000012593	ENSACAG00000001185	N	N	N	0.143	0.120092	0.36499	0.0444839	0	0	0	0	NA	NA	NA	NA
SLC30A5	ENSGALG00000014787	ENSACAG00000016363	N	N	N	0.504	0.47259	0.0468703	0.127	0	0.333333	2	0.5	-0.155249	0.88627	0.730989	1.22036
SLC35D2	XM_004951107.1	ENSACAG00000012938	N	N	N	0.183	0.432105	NA	0.0451	0	0	0	0	NA	NA	NA	NA
SLC38A9	ENSGALG00000014712	ENSACAG00000015025	N	N	N	0.088	0.293406	0.283135	0.0799808	0	2.83333	0	2	1.18217	0.179899	0.604875	1.41462
SLC44A1	ENSGALG00000015439	ENSACAG00000008390	N	N	N	0.189	0.201203	0.0950475	0.160477	12	7.66667	11	7	0.576159	1.79521	-0.215082	1.97493
SLC45A2	ENSGALG00000003310	NA	N	N	N	0.093	0.163012	0.307529	0.00961111	0	0.333333	0	0	NA	NA	NA	NA
SLC46A2	ENSGALG00000027345	ENSACAG00000017402	N	N	N	0.11	0.0748733	0.276305	0.0524375	0	0	0	0	NA	NA	NA	NA
SLCO4C1	ENSGALG00000015251	NA	N	N	N	0.229	0.0769592	NA	0.0729286	0	0	0	0.166667	NA	NA	NA	NA
SLCO6A1	ENSGALG00000026768	ENSACAG00000029435	N	N	N	0.016	0.031857	0.292057	0.00133333	0	0	0	0	NA	NA	NA	NA
SMAD2	ENSGALG00000014697	ENSACAG00000018008	Y	Y	Y	1	0.529459	0.00755477	0.235095	6	4.66667	3	1.83333	NA	NA	NA	NA
SMAD4	NA	NA	N	N	N	NA	0.472647	NA	0.0721373	0	0	3	3.83333	NA	NA	NA	NA
SMAD7	ENSGALG00000018639	ENSACAG00000018004	Y	Y	Y	0.604	0.228048	0.145947	0.456562	16	7.66667	10	4.66667	NA	NA	NA	NA
SMARCA2	ENSGALG00000010164	ENSACAG00000002423	N	N	N	1	0.44935	0.0470783	0.307	17	9.16667	12	7	0.175029	-0.0455962	-0.221979	-0.731366
SMC2	ENSGALG00000015691	ENSACAG00000012835	N	N	N	0.878	0.305786	0.421481	0.0322885	0	0	0	0	NA	NA	NA	NA
SMC5	ENSGALG00000015118	ENSACAG00000000931	N	N	Y	0.337	0.507599	0.434229	0.0338333	0	0	0	0	2.30179	0.944855	2.11636	NA
SMIM15	ENSGALG00000023443	ENSACAG00000008871	N	N	N	NA	0.653038	0.0808804	0.0813636	0	0	0	0	0.444409	0.378055	1.24594	0.49745
SMN	ENSGALG00000002430	ENSACAG00000010017	N	N	N	NA	NA	0.196707	NA	NA	NA	NA	NA	NA	NA	NA	NA
SMU1	ENSGALG00000002014	ENSACAG00000003444	N	N	N	0.162	0.609947	0	0.0301154	0	0	0	0	0.35325	1.0352	0.119187	0.470209
SNAPC3	NA	NA	N	N	N	0.155	0.257208	NA	0.0591	0	0	0	0	NA	NA	NA	NA
SNCAIP	ENSGALG00000005330	ENSACAG00000023071	N	N	N	0.249	0.267491	0.13245	0.3158	9	11.5	8	5.66667	NA	0.596829	NA	NA
SNX18	ENSGALG00000014914	ENSACAG00000015508	N	Y	Y	0.222	0.260852	0.12571	0.270425	10	6.33333	8	4.66667	-0.36807	0.612404	0.280176	-0.0530564
SNX2	ENSGALG00000005337	ENSACAG00000003451	N	N	N	0.285	0.514609	0.0763423	0.172273	12	3	9	3.66667	0.57026	-0.0482558	1.43705	1.05277
SNX24	ENSGALG00000018874	ENSACAG00000003449	N	N	N	0.165	0.255755	0.0250326	0.0902449	1	0.5	0	0.5	0.279445	0.360088	1.32076	1.09275
SNX30	ENSGALG00000015660	ENSACAG00000017384	N	N	N	0.119	0.317306	0.0458967	0.209825	1	0	0	0	0.293445	0.590498	1.31642	NA
SPAG8	ENSGALG00000027127	NA	N	N	N	0.12	0.144916	0.211018	0	0	0	0	0	NA	NA	NA	NA
SPEF2	ENSGALG00000023552	ENSACAG00000008901	N	N	N	0.102	0.315975	0.456909	0.0125714	0	0	0	0	NA	-0.205216	0.768397	NA
SPIN1	ENSGALG00000014916	NA	Y	Y	Y	0.058	0.498634	0	0.185702	12	14.6667	17	12.1667	NA	NA	NA	NA
SPINK4	ENSGALG00000021842	ENSACAG00000029294	N	N	N	0.09	0.0667051	0.483234	0.004	0	0	0	0	NA	NA	NA	NA
SPTLC1	ENSGALG00000013493	ENSACAG00000001052	N	N	N	0.348	0.59783	0.13131	0.136118	0	0	2	0	1.78486	1.29273	0.893649	0.818304
SREK1	ENSGALG00000014775	NA	N	Y	Y	NA	0.410453	0.144777	0.2643	14	7.16667	8	2.33333	NA	NA	NA	NA
SREK1IP1	ENSGALG00000026028	ENSACAG00000015621	N	N	N	NA	0.676258	0.0202219	0.117612	0	0	0	0	1.29671	0.901227	0.392447	1.00625
SRFBP1	ENSGALG00000005316	ENSACAG00000003779	N	N	N	0.084	0.528044	0.578731	0.0156034	0	0	0	0	0.615253	1.37957	1.85794	1.65698
SRP19	ENSGALG00000000218	ENSACAG00000007550	N	N	N	0.08	0.670266	NA	0.0698182	0	1.33333	3	1.33333	0.699324	1.15285	1.8768	2.9233
SSBP2	ENSGALG00000023089	ENSACAG00000029227	N	N	N	0.164	0.428038	0.103624	0.122167	8	5	5	4.16667	1.03873	1.07478	-0.153875	NA
ST8SIA3	ENSGALG00000003049	ENSACAG00000009347	Y	Y	Y	NA	0.152032	0.0571874	0.144605	1	0.5	1	0.833333	NA	NA	NA	NA
ST8SIA4	ENSGALG00000026192	ENSACAG00000004472	N	N	N	0.136	0.237069	0.0892799	0.279837	7	3	4	1	NA	0.909735	NA	NA
ST8SIA5	ENSGALG00000001808	ENSACAG00000012397	N	N	N	0.144	0.101015	0.0217272	0.186444	0	0	0	0	NA	NA	NA	NA
STARD4	ENSGALG00000000241	ENSACAG00000007330	N	N	N	0.109	0.293147	0.192149	0.019675	0	0.833333	1	0.666667	0.314836	0.550364	NA	NA
STARD6	NA	NA	N	N	N	NA	0.0368514	NA	0.0255	0	0	0	0	NA	NA	NA	NA
STOML2	ENSGALG00000002064	ENSACAG00000011614	N	N	N	0.821	0.598963	0.118077	0.0361429	0	0	0	0	-1.27062	-0.0877965	-0.208476	0.467582
SUB1	ENSGALG00000003248	ENSACAG00000007974	Y	Y	Y	0.653	0.488893	0.0343249	0.186	0	1.5	0	1.16667	-0.0852183	1.152	0.661552	0.950611
SUSD1	ENSGALG00000015677	ENSACAG00000022560	N	N	N	0.071	0.461338	0.306988	0.0603429	0	0	0	0	1.65866	0.424103	1.47635	NA
SV2C	ENSGALG00000014967	ENSACAG00000008315	N	N	N	0.14	0.0771118	0.0688073	0.119426	3	5.16667	0	3.16667	NA	NA	NA	NA
SVEP1	ENSGALG00000015721	ENSACAG00000013043	N	N	N	0.716	0.184964	0.148087	0.122333	0	0	0	0	1.21056	NA	NA	NA
SYK	ENSGALG00000015216	ENSACAG00000000768	N	N	N	0.843	0.189288	0.104478	0.0300294	0	0	0	0	NA	1.86625	-0.274102	NA
SYT4	ENSGALG00000008893	ENSACAG00000014117	N	N	N	0.247	0.0742486	0.0793245	0.132793	7	1.5	2	1.66667	NA	NA	NA	NA
TAF1C	ENSGALG00000025868	ENSACAG00000025553	N	N	N	NA	0.420105	0.194669	0.031	0	0	0	0	NA	0.434554	NA	NA
TAF9	ENSGALG00000020534	ENSACAG00000010323	N	N	N	0.951	0.32905	0.0384637	0	0	0	0	0	NA	NA	NA	NA
TAL2	ENSGALG00000023114	ENSACAG00000004545	N	N	N	0.125	0.202753	0.147573	0.0620476	2	0.166667	0	0	NA	NA	NA	NA
TARS	ENSGALG00000003288	NA	N	N	N	0.828	0.570312	0.0532591	0.0373043	0	0	0	0	NA	NA	NA	NA
TBC1D2	ENSGALG00000001944	ENSACAG00000004008	N	N	N	0.078	0.253975	0.189936	0.0264615	0	0.5	0	1.16667	NA	3.05753	NA	NA
TBCA	ENSGALG00000004353	ENSACAG00000014223	N	N	Y	0.263	0.522172	0.0637971	0.0391333	0	1.16667	1	1	0.616485	1.32811	1.3224	0.00525025
TCF4	ENSGALG00000028365	ENSACAG00000008863	Y	Y	Y	0.959	0.295859	0.673503	0.353075	4	0.666667	45	31.1667	NA	NA	NA	NA
TDRD7	ENSGALG00000012350	ENSACAG00000001003	N	N	N	0.197	0.292175	0.424668	0.886	0	0.5	1	0	1.76913	0.829179	NA	NA
TEK	ENSGALG00000001840	ENSACAG00000017459	N	N	N	0.886	0.232702	0.0693299	0.1141	0	0.166667	0	0	0.74475	1.02923	0.754018	NA
TESK1	ENSGALG00000027658	ENSACAG00000013781	N	N	N	0.214	0.355429	0.178408	0.0462	0	0	0	0	0.476679	-0.486472	0.357467	NA
TEX43	XM_004949374.1	ENSACAG00000002875	N	N	N	NA	NA	NA	NA	NA	NA	NA	NA	NA	NA	NA	NA
THAP1	ENSGALG00000015385	ENSACAG00000005705	N	N	N	0.168	0.467248	0.0853562	0.124524	1	0.5	3	0.5	0.5613	0.495798	0.751794	1.43024
THBS4	ENSGALG00000014804	ENSACAG00000016545	N	N	N	0.154	0.142356	0.102971	0.130462	0	0	0	0	NA	NA	NA	NA
TICAM2	ENSGALG00000028484	ENSACAG00000028497	N	N	N	NA	0.483912	0.0939633	0.0682381	0	0	0	0	NA	NA	NA	NA
TJP2	ENSGALG00000015109	ENSACAG00000001252	N	N	N	0.302	0.489131	0.0943909	0.133333	1	0.166667	1	0.666667	0.337667	1.21986	0.159642	-0.333372
TLE1	ENSGALG00000012575	ENSACAG00000002262	N	N	N	0.981	0.371593	0.0210142	0.0395	15	7.66667	11	4.66667	1.15692	0.380131	-0.738739	1.42172
TLE4	ENSGALG00000015184	ENSACAG00000002789	N	N	N	0.947	0.152747	0.00521669	0.351524	19	12	16	10.8333	1.28307	-0.171209	0.806165	NA
TLN1	ENSGALG00000002548	ENSACAG00000010939	N	N	N	0.273	0.231265	0.0191681	0.202525	0	0	0	0	-0.137023	1.28755	-0.0472728	0.910398
TMC1	ENSGALG00000015145	ENSACAG00000012478	N	N	N	0.096	0.187581	0.0973139	0.0353333	0	0	0	0	NA	NA	NA	NA
TMED7	ENSGALG00000028484	NA	N	N	N	NA	0.0369828	NA	0.0833284	2	0.5	0	0	NA	NA	NA	NA
TMEM161B	ENSGALG00000010896	ENSACAG00000000583	N	N	Y	0.266	0.460052	0.0717762	0.143913	10	3.66667	7	2.33333	0.467212	0.499261	0.615084	0.487537
TMEM167A	ENSGALG00000027332	ENSACAG00000011153	N	N	N	NA	0.617506	0.0676583	0.15649	0	0.166667	0	0	0.803336	0.627655	1.29897	1.79465
TMEM171	ENSGALG00000015020	ENSACAG00000009564	N	N	N	0.086	0.125709	0.340643	0	0	0	0	0	NA	NA	0.160891	NA
TMEM174	ENSGALG00000015021	ENSACAG00000009559	N	Y	Y	0.299	0.0457668	0.160892	0.0356667	0	0	0	0	NA	NA	NA	NA
TMEM175	ENSGALG00000015368	ENSACAG00000001342	N	N	N	0.144	0.405193	0.194752	0.0503333	0	0	0	0	1.03368	1.18311	-0.0279162	0.18431
TMEM2	ENSGALG00000015138	ENSACAG00000012861	N	N	Y	0.064	0.218989	0.14173	0.310222	2	2	1	0.333333	1.77717	0.23069	NA	NA
TMEM215	ENSGALG00000015754	ENSACAG00000001211	N	N	N	NA	0.0757569	0.137475	0.0661143	1	0.166667	0	0	NA	NA	NA	NA
TMEM232	NA	NA	N	N	N	NA	0.0974178	NA	0.0175	0	0	0	0	NA	NA	NA	NA
TMEM246	ENSGALG00000015545	ENSACAG00000017458	N	N	N	NA	0.263056	0.161915	0.1025	0	0	0	0	NA	-0.246362	0.33262	NA
TMEM252	ENSGALG00000023357	ENSACAG00000029180	N	N	N	NA	0.159182	0.423252	0.0849286	0	0	0	0	NA	NA	NA	NA
TMEM38B	ENSGALG00000027472	ENSACAG00000004542	N	N	N	0.178	0.258257	0.275135	0.061	0	0	0	0	0.641735	1.25408	0.588829	1.75622
TMEM8B	ENSGALG00000002386	ENSACAG00000013720	N	N	N	NA	0.456477	0.0369686	NA	0	0	0	0	NA	-0.629454	NA	NA
TMOD1	ENSGALG00000002125	ENSACAG00000001018	N	N	N	0.154	0.242917	0.0540969	0.164032	4	0.666667	0	0	1.15081	0.791754	-0.781819	NA
TNFAIP8	ENSGALG00000027761	ENSACAG00000003983	N	N	N	0.396	0.219052	0.0380485	0.127455	2	2.83333	3	2.33333	-0.0696403	NA	0.158059	NA
TNPO1	ENSGALG00000015014	ENSACAG00000009599	N	Y	Y	0.965	0.534175	0.0539143	0.299596	42	35.3333	38	28	1.20495	0.381874	1.18853	0.613973
TOMM5	ENSGALG00000026300	NA	N	N	N	NA	0.156	0.00304181	0.0814286	0	0	0	0.333333	NA	NA	NA	NA
TOPORS	ENSGALG00000020523	ENSACAG00000001351	N	N	N	0.215	0.373603	0.24091	0.137133	4	0.5	0	0	1.3044	0.537326	1.84942	-0.105048
TPGS2	ENSGALG00000026547	ENSACAG00000012481	N	N	N	NA	0.227175	0.30597	0.0391481	0	0	0	0	0.603363	0.760657	0.182128	0.37941
TPM2	ENSGALG00000025842	ENSACAG00000010881	N	N	N	0.772	0.154471	0.0382349	0.0391	3	1.16667	2	0.666667	-1.64756	1.11598	-0.364348	0.626491
TPPP2	ENSGALG00000015213	ENSACAG00000011386	N	N	N	0.125	0.0325948	NA	NA	NA	0	0	0	NA	NA	NA	NA
TRABD2A	ENSGALG00000026395	ENSACAG00000000547	N	N	N	NA	0.085935	0.232564	0.00615385	0	0	0	0	NA	NA	NA	NA
TRAPPC13	ENSGALG00000014767	ENSACAG00000015838	N	N	Y	NA	0.710674	0.0336989	0.02675	0	0	0	0.166667	0.321062	0.485649	1.68409	1.20984
TRIM14	ENSGALG00000015315	ENSACAG00000002113	N	N	N	0.365	0.227635	0.323346	0.0433684	0	0	0	0	NA	NA	NA	NA
TRIM23	ENSGALG00000014765	ENSACAG00000015817	N	N	N	0.55	0.329542	0.0571338	0.216231	0	0	2	0.166667	0.95956	0.279532	1.52384	0.262038
TRIM36	ENSGALG00000008188	ENSACAG00000007939	N	N	N	0.431	0.0630419	0.174579	0.128	3	0.333333	5	1.16667	NA	-0.797362	NA	NA
TRMT10B	ENSGALG00000029118	ENSACAG00000012156	N	N	N	NA	0.568086	0.133766	0.0421667	0	0	0	0	0.858331	1.25477	0.679343	NA
TRPM3	ENSGALG00000015126	ENSACAG00000008993	N	N	Y	0.433	0.11909	0.0519718	0.268317	15	7.5	10	3.66667	NA	-0.554229	NA	NA
TRPM6	ENSGALG00000015154	ENSACAG00000005230	N	N	N	0.124	0.169961	0.247257	0.0705357	0	0	0	0	NA	NA	1.01936	NA
TSTD2	ENSGALG00000002110	ENSACAG00000004543	N	N	N	NA	0.374591	0.245326	0.0532581	0	0	0	0	0.660325	0.689552	0.844274	NA
TTC23L	NA	NA	N	N	N	NA	0.0587304	NA	0	0	0	0	0	NA	NA	NA	NA
TTC33	ENSGALG00000014826	ENSACAG00000010230	N	N	N	0.143	0.476632	0.183597	0.0593182	0	0	0	0	0.37499	0.353571	1.09259	1.33151
TTC37	ENSGALG00000014670	ENSACAG00000013091	N	N	N	NA	0.322886	0.270694	0.0633611	0	0	0	0	1.01306	0.417547	1.94161	0.347559
TTC39B	ENSGALG00000005416	ENSACAG00000017770	N	N	N	NA	0.253492	0.0866511	0.0105965	1	1.83333	2	1.83333	NA	-0.177751	1.32577	1.46488
TUSC1	ENSGALG00000017510	NA	N	N	N	0.06	0.346682	NA	0.0231429	0	0	0	0	NA	NA	NA	NA
TXNDC2	ENSGALG00000015704	ENSACAG00000013018	N	N	N	0.03	0.0323526	0.515948	0.0167143	0	0	1	0.333333	NA	NA	NA	NA
TXNL1	ENSGALG00000002948	ENSACAG00000009121	Y	Y	Y	0.397	0.354162	0.00988593	0.0451707	2	1.33333	3	0.666667	NA	NA	NA	NA
TYRP1	ENSGALG00000015205	ENSACAG00000011322	N	N	N	0.374	0.0574108	0.0864237	0.0346909	0	0	0	0	NA	NA	NA	NA
UBAP1	ENSGALG00000021378	ENSACAG00000013000	N	Y	Y	0.33	0.605988	0.177639	0.208917	0	0	0	0.333333	0.782514	0.411587	0.599451	0.567034
UBAP2	ENSGALG00000013809	ENSACAG00000012876	Y	Y	Y	NA	0.302188	0.213089	0.0376154	0	0.333333	0	0	0.431933	0.966131	0.195352	NA
UBE2R2	ENSGALG00000001668	ENSACAG00000012852	Y	Y	Y	0.706	0.418031	0	0.236794	11	5.33333	1	1.16667	NA	NA	NA	NA
UBQLN1	ENSGALG00000012585	ENSACAG00000001880	N	Y	Y	0.453	0.638391	0.202502	0.0826364	2	2.16667	2	5.66667	0.782123	-0.212508	1.08824	0.881723
UGCG	ENSGALG00000015682	ENSACAG00000017299	N	N	N	0.149	0.477747	0.111605	0.214947	21	10.6667	18	9.5	2.38468	-0.242415	1.91287	0.578611
UHRF2	ENSGALG00000015052	ENSACAG00000004142	N	N	N	0.215	0.359637	0.124922	0.455	13	4.5	8	2.83333	0.510974	0.343013	-0.238408	-0.565209
UNC13B	ENSGALG00000002165	ENSACAG00000015635	N	N	N	0.418	0.300772	0.106044	0.155056	1	0	0	0	NA	0.0186559	0.134987	-0.630359
UTP15	ENSGALG00000013510	ENSACAG00000009351	N	N	N	0.169	0.559557	0.158515	0.0509394	0	0.166667	0	0	0.0783771	0.0795507	1.90336	1.01929
VCAN	ENSGALG00000015624	ENSACAG00000011195	N	N	N	0.994	0.142249	NA	0.256054	12	6	7	4	1.48897	1.04439	NA	NA
VCP	ENSGALG00000001986	ENSACAG00000011733	Y	Y	Y	NA	0.611176	0.0159754	0.0489333	0	0	0	0	0.347474	1.12614	1.09184	1.23463
VLDLR	ENSGALG00000010166	ENSACAG00000003015	N	N	N	0.281	0.383165	0.154259	0.197569	6	3.33333	7	1.16667	-1.68007	-0.137774	-0.680391	NA
VPS13A	ENSGALG00000015170	ENSACAG00000005655	N	N	N	0.131	0.503588	0.164962	0.0523529	1	0.166667	0	0.333333	1.62761	-0.138197	1.52888	0.696382
WDR36	ENSGALG00000000247	ENSACAG00000007141	N	N	N	0.093	0.580749	0.172093	0.0137667	0	0	0	0	0.640804	0.922514	1.75138	1.51182
WDR41	ENSGALG00000004350	ENSACAG00000007717	N	N	Y	0.393	0.551175	0.210526	0.0635968	2	0.166667	0	0	1.07869	0.562174	0.906292	0.966442
WDR7	ENSGALG00000003019	ENSACAG00000009169	N	N	N	0.248	0.347677	0.0417321	0.128426	9	7.5	9	7.83333	NA	NA	NA	NA
WDR70	ENSGALG00000003708	ENSACAG00000009770	N	N	N	0.203	0.562573	0.100738	0.0202558	0	0.166667	0	0.5	0.952876	1.59675	0.346921	1.36928
XPA	ENSGALG00000028998	ENSACAG00000004384	N	N	N	0.332	0.374672	0.0721008	0.018	0	0	0	0	0.442117	1.30204	1.55344	0.814614
XRCC4	ENSGALG00000015620	ENSACAG00000011160	N	N	N	0.8	0.39549	0.195849	0.0416667	0	0	0	0	0.425092	1.27566	1.82619	1.28502
YTHDC2	ENSGALG00000000189	ENSACAG00000007754	N	N	N	0.321	0.390944	0.221983	0.122882	0	0	0	0	1.19376	0.295578	1.66209	0.0679939
ZBTB5	ENSGALG00000005354	ENSACAG00000011965	N	N	Y	0.255	0.414854	0.0215781	0.200629	1	1	0	0.333333	0.409122	0.972728	-0.0648662	0.247829
ZBTB7C	ENSGALG00000014696	ENSACAG00000018007	N	N	Y	0.26	0.190014	0.0879792	0.158667	7	1.66667	10	1.33333	NA	NA	NA	NA
ZCCHC6	ENSGALG00000012607	ENSACAG00000000279	N	N	Y	0.151	0.382944	0.235876	0.0733	0	1.33333	0	0.666667	1.51566	1.3588	0.795204	-0.882942
ZCCHC7	ENSGALG00000005433	ENSACAG00000011894	N	N	N	0.104	0.544918	0.383775	0.02175	0	0	0	0	NA	NA	NA	NA
ZCCHC9	ENSGALG00000015603	ENSACAG00000010965	N	N	Y	0.13	0.623798	0.230555	0.038	0	0	0	0.166667	-0.0613089	0.903523	1.99386	1.05002
ZDHHC21	ENSGALG00000027428	ENSACAG00000017794	N	N	N	0.112	0.427978	0.14494	0.144288	4	1.66667	2	2	NA	0.280547	1.23039	NA
ZFAND5	ENSGALG00000015144	ENSACAG00000012653	N	Y	Y	0.13	0.336095	0.131189	0.208066	13	10.1667	16	10.5	1.95157	0.322104	0.63053	1.61062
ZFR	ENSGALG00000003235	ENSACAG00000007880	Y	Y	Y	0.594	0.579343	0.0233617	0.227077	8	6.66667	2	3	NA	NA	NA	NA
ZFYVE16	ENSGALG00000015576	ENSACAG00000010379	N	N	N	0.507	0.366873	0.398786	0.15	1	0.833333	0	0.166667	0.526668	1.28154	1.13666	1.06447
ZNF131	ENSGALG00000014859	ENSACAG00000010702	N	Y	Y	0.234	0.391529	0.162886	0.386	5	1.33333	7	1.33333	NA	NA	NA	NA
ZNF366	ENSGALG00000015008	ENSACAG00000009713	N	N	N	0.193	0.301606	0.107892	0.0831026	1	0.833333	0	0	NA	NA	0.701963	NA
ZNF367	ENSGALG00000012629	ENSACAG00000012929	N	N	Y	0.753	0.218899	0.107086	0.287607	16	6.66667	10	2.33333	NA	NA	NA	NA
ZNF462	ENSGALG00000015451	ENSACAG00000003537	N	Y	Y	0.361	0.430858	0.0628475	0.341148	34	15.6667	26	11	0.281872	0.06141	0.898726	NA
ZNF474	ENSGALG00000023040	ENSACAG00000003682	N	N	N	0.091	0.0473088	NA	0.0705	0	0	0	0	NA	NA	NA	NA
ZNF532	ENSGALG00000002852	ENSACAG00000007475	Y	Y	Y	0.761	0.246682	0.0734084	0.315367	12	3.83333	7	0.833333	NA	NA	NA	NA
ZNF608	ENSGALG00000005016	ENSACAG00000003135	N	N	N	0.156	0.472767	0.145941	0.25955	13	13	13	11.1667	0.832616	1.8601	0.2151	0.590372
ZSWIM6	ENSGALG00000014734	ENSACAG00000008772	Y	Y	Y	0.591	0.508729	0.165934	0.347042	29	26.1667	23	16.8333	0.865017	1.4005	1.5474	NA
