# Supplementary material for: Conserved microRNA targeting reveals preexisting gene dosage sensitivities that shaped amniote sex chromosome evolution
Source: Genome Res. 2018 Apr;28(4):474–83. doi: 10.1101/gr.230433.117 (PMC5880238; doi:10.1101/gr.230433.117)
Supplement: Supplemental Material [file supp_gr.230433.117_Supplemental_Table_S6.xlsx]

## Sheet: 12miRNA_HeLa
Gene expression fold changes from small RNA transfections in HeLa corresponding to 12 different miRNAs. Column names are relevent GEO array IDs
Gene	GSM210904	GSM37601	GSM210913	GSM210903	GSM210911	GSM210898	GSM210897	GSM37599	GSM210901	1595297513	GSM210909	GSM119747		Array ID	Seed	Family
A2M	-0.02	0.239	0.253	-0.167	-0.019	-0.047	-0.011	0.008	-0.375	-0.488	0.036	-0.128		GSM210904	AACAGUC	miR-212;miR-132
NAT2	-0.051	0.006	-0.05	0.034	0.071	-0.11	0.029	0.052	0.06	0.083	0.027	0.151		GSM37601	AAGGCAC	miR-124;miR-506
ACADS	0.037	0.028	-0.122	-0.092	0.197	0.008	0.183	0.051	0.15	0.073	0.036	-0.128		GSM210913	ACAUUCA	miR-181a;miR-181b;miR-181c;miR-181d
ACAT1	0.15	0.032	0.105	0.165	0.044	0.061	-0.017	0.041	-0.016	-0.035	-0.04	0.042		GSM210903	CACAGUG	miR-128
PSEN1	-0.085	-0.127	-0.295	-0.145	-0.377	-0.078	-0.053	-0.21	-0.027	0.121	-0.087	0.025		GSM210911	CAGUGCA	miR-148a;miR-152;miR-148b
SGCA	-0.025	-0.177	-0.012	0.009	-0.048	0.19	-0.085	-0.029	0.004	0.09	0.111	0.038		GSM210898	CUUUGGU	miR-9
ADRB3	0.129	0.015	-0.056	0.202	-0.08	0.015	0.03	0.171	0.004	NA	0.108	-0.104		GSM210897	GGAAGAC	miR-7
AGA	0	0.241	-0.025	-0.039	0.007	0.082	-0.125	-0.23	0.07	-0.081	-0.094	-0.067		GSM37599	GGAAUGU	miR-1;miR-206;miR-613
AGT	-0.032	0.096	-0.061	0.11	0.161	0.029	0.153	-0.07	-0.108	-0.295	-0.045	0.052		GSM210901	GGAGUGU	miR-122
AGXT	-0.01	0.083	-0.01	0.053	-0.008	-0.057	0.02	-0.01	-0.068	-0.159	0.006	0.018		1595297513	GGCAGUG	miR-34a;miR-34c-5p;miR-449a;miR-449b
ALAD	-0.001	0.172	0.032	-0.105	0.055	-0.341	-0.061	-0.021	-0.117	-0.025	0.109	0.092		GSM210909	GUAGUGU	miR-142-3p
ABCD1	0.064	-0.346	-0.022	0.036	-0.012	0.004	-0.076	0.138	0.063	NA	0.056	-0.114		GSM119747	UCACAUU	miR-23a;miR-23b
ALDOB	-0.165	-0.103	-0.126	0.641	0.2	0.082	0.04	0.13	NA	-0.002	-0.034	-0.106
AMPD1	-0.138	-0.163	0.004	-0.016	0.106	0.112	0.01	0.043	0.032	0.515	0.164	0.049
APOE	0.103	-0.174	-0.045	0.163	-0.205	0.025	-0.047	-0.081	-0.234	0.076	0.009	-0.067
APOH	-0.062	-0.307	0.008	0.262	0.182	-0.215	0.115	0.312	-0.436	NA	-0.05	0.028
ARG1	-0.003	0.063	-0.004	-0.05	-0.039	0.305	-0.014	0.446	-0.414	-0.124	0	-0.167
ARSB	0.103	-0.023	-0.305	-0.019	-0.082	0.1	-0.323	0.148	-0.694	-0.019	-0.038	0.154
ARSE	0.05	-0.011	0.002	0.021	0.006	0.125	-0.058	0.039	-0.048	-0.061	0.063	0.1
ASL	0.053	-0.078	0.022	-0.076	-0.127	0.116	0.012	-0.059	-0.171	0.134	-0.007	-0.082
ASPA	0.102	-0.041	0.035	0.154	0.138	0.281	0.132	0.267	-0.187	-0.168	-0.037	0.013
ATP7A	-0.294	-0.699	0.11	-0.184	-0.988	-0.489	0.157	0.103	-0.83	NA	-0.125	0.089
AVPR2	0.042	0.009	-0.035	-0.119	0.022	-0.02	0.05	-0.112	0.019	NA	0.113	0.026
BCHE	-0.035	0.325	-0.116	0.316	0.129	-0.143	-0.078	0.056	0.195	-0.025	0.12	-0.146
BLM	-0.043	0.015	0.181	0.151	-0.024	0.121	-0.148	-0.256	-0.399	0.033	-0.048	0.106
BRCA2	0.002	-0.056	0.143	-0.454	-0.097	-0.253	0.098	-0.078	-0.992	-0.162	0.167	-0.122
BTD	-0.1	0.391	0.112	-0.124	-0.004	0.209	-0.007	-0.326	0.052	0.017	0.003	0.076
BTK	0.272	0.313	-0.316	-0.168	1.39	-0.383	-0.095	0.117	NA	-0.248	0.321	0.166
C3	0.026	-0.394	0.168	-0.122	0.112	-0.142	0.018	-0.302	-0.142	-0.002	-0.055	-0.121
C8B	0.437	0.129	0.005	-0.451	-0.343	-0.073	-0.02	0.015	0.191	NA	-0.035	0.08
CA2	0.329	0.912	-0.06	-0.094	0.106	0.082	0.155	-0.054	-1.27	0.144	0.211	-0.333
CACNA1S	0.016	-0.11	0.083	0.081	-0.006	0.028	0.07	0.006	-0.126	0.254	-0.042	0.125
CBS	0.088	0.049	0	-0.033	-0.049	0.172	-0.002	-0.238	0.008	0.145	0.025	-0.136
CD3G	-0.028	0.119	0.062	-0.018	0.109	0.142	-0.107	-0.038	-0.078	0.135	0.009	-0.003
CDK4	0.102	-1.029	-0.161	0.18	-0.169	0.135	0.062	-0.553	0.059	-0.857	0.014	-0.117
CDKN2A	-0.011	-0.167	-0.117	-0.242	-0.229	-0.127	-0.07	0.14	-0.142	0.082	-0.097	0.085
CETP	0.195	0.056	0.025	0.162	-0.029	0.031	0.063	0.004	-0.043	-0.15	-0.082	-0.175
CHRNA1	-0.036	0.113	0.003	0.088	0.074	0.098	0.025	-0.107	0.116	0.009	-0.05	0.161
CHRNE	0.308	-0.009	-0.422	-0.073	-0.049	-0.047	-0.039	-0.069	0.026	0.014	0.085	0.089
LYST	0.045	0.1	0.013	0.129	0.024	-0.338	0.077	0.239	0.136	NA	-0.079	0.022
ERCC8	0.088	-0.025	0.008	-0.072	0.227	-0.063	0.078	-0.082	0.154	-0.205	0.017	-0.026
CLCN1	0.035	-0.182	-0.013	0.022	0.056	0.011	-0.037	0.124	0.082	-0.012	0.136	-0.078
CLCNKB	0.115	0.023	0.005	0.066	-0.097	-0.021	-0.03	-0.06	-0.072	NA	-0.066	0.004
CLN3	0.087	0.17	-0.045	0.047	0.194	0.246	-0.153	-0.093	0.105	-0.11	0.055	0.059
COL1A1	0.069	-0.024	-0.088	-0.222	0.3	-0.054	0.006	-0.079	0.762	-0.442	0.245	-0.174
COL1A2	0.042	-0.002	-0.052	-0.025	0.169	-0.023	-0.035	0.032	-0.137	-0.08	-0.015	-0.106
COL3A1	0.436	0.142	-0.042	-0.194	0.761	0.607	0.21	-0.362	-6.561	0.123	0.048	-0.099
COL4A4	-0.159	-0.211	0.378	-0.339	0.082	-0.371	0.16	-0.202	-0.439	-0.627	-0.002	-0.054
COL5A1	0.094	-0.043	-0.019	-0.037	-0.155	-0.35	0.05	-0.212	-0.315	NA	-0.093	0.023
COMP	0.066	-0.114	-0.063	0.16	-0.07	0.113	0.025	0.04	-0.096	-0.008	0.025	-0.001
CP	0.251	0.232	0.035	-0.294	-0.502	-0.137	-0.322	0.304	NA	0.107	-0.056	-0.086
CPOX	0.142	-0.284	-0.781	-0.027	0.101	-0.048	0.048	-0.85	0.338	0.072	0.258	-0.165
CPT2	0.007	0.133	0.129	0.161	-0.025	-0.002	0.26	0.004	-0.01	0.126	-0.103	-0.038
CST3	0.011	0.12	-0.084	-0.087	-0.064	-0.107	-0.04	-0.161	-0.232	0.017	0.067	-0.016
CSTB	0.163	0.045	0.062	0.024	-0.188	0.12	-0.051	-0.048	0.018	0.06	0.039	-0.006
CYBA	0.048	-0.002	-0.126	0.036	-0.148	0.052	-0.078	-0.163	-0.006	NA	-0.056	-0.084
CYP17A1	0.064	-0.197	-0.063	0.115	0.127	-0.014	-0.048	0.056	0.042	0.478	0.038	0.016
CYP19A1	0.503	-0.4	-0.176	-0.246	-0.28	-0.223	-0.015	0.171	1.624	0.071	0.037	-0.191
CYP1B1	0.057	-1.104	0.051	-0.23	0.318	-0.497	0.315	-0.02	0.611	-0.273	0.126	-0.212
DDB2	0.009	0.356	-0.217	0.17	0.148	0.116	0.082	0.045	0.36	-0.586	0.316	0.012
DLD	0.019	0.237	-0.022	0.084	0.117	0.217	0.024	0.068	0.267	0.018	0.055	0.01
DMD	-0.022	0.002	0.038	0.074	0.623	0.238	0.015	0.084	0.719	NA	-0.092	0.147
DPYD	-0.084	-0.956	0.132	0.002	0.275	-0.072	0.206	-0.083	0.028	0.304	-0.091	0.168
SLC26A3	0.035	-0.054	-0.01	0.018	-0.203	-0.006	-0.085	0.158	0.028	NA	0.128	0.192
SLC26A2	-0.087	-0.249	-0.129	-0.143	0.218	0.17	0.036	0.094	-0.103	0.058	-0.049	-0.083
TOR1A	-0.167	0.018	0.092	-0.038	0.232	0.16	-0.044	-0.292	-0.129	-0.024	0.005	-0.084
EMD	-0.105	-0.079	-0.127	0	0.008	0.097	0.036	0.165	0.134	0.364	-0.114	-0.033
ENG	0.066	-0.112	-0.087	0.073	-0.068	0.068	0.119	-0.038	-0.035	NA	0.013	0.116
EPHX1	-0.041	0.154	-0.024	-0.086	0.237	0.005	-0.064	-0.106	-0.112	-0.298	0.095	-0.068
EPOR	0.027	0.098	-0.038	0.148	0.029	0.127	0.038	-0.117	0.209	0.344	-0.073	0.109
ERCC3	-0.003	0.203	-0.008	-0.033	-0.083	-0.102	0.167	0.259	0.07	0.162	-0.025	0.035
ERCC5	0.157	-0.204	-0.057	0.106	-0.087	0.044	0.072	0.064	0.197	0.181	0.138	0.17
ERCC6	-0.061	0.314	0.136	0.083	-0.133	0.04	0.003	0.105	0.126	-0.118	0.023	-0.1
EXT1	-0.105	-0.038	-0.009	0.088	0.007	0.059	0.08	-0.455	-0.054	NA	-0.122	0.07
F11	-0.028	0.293	0.134	0.164	0.223	-0.079	0.057	0.562	0.025	0.165	0.044	-0.041
F13A1	0.018	0.07	-0.011	0.064	-0.052	-0.038	-0.009	-0.07	-0.087	0.045	-0.03	0.021
F9	0.502	-0.067	-0.541	0.097	-1.041	-0.423	0.43	-0.302	0.86	0.684	0.043	6.461
FABP2	0.369	0.089	-0.095	-0.159	0.072	0.035	-0.201	0.386	0.518	0.288	0.002	-0.379
FANCA	-0.107	-0.084	0.097	0.027	-0.151	0.053	0.137	0.122	-0.006	-0.066	0.078	0.038
FANCC	-0.107	-0.082	0.033	0.226	-0.095	-0.38	0.25	-0.216	-0.216	-0.164	-0.163	-0.03
FAH	-0.031	0.04	-0.045	0.114	-0.136	-0.077	0.075	-0.178	-0.086	NA	-0.053	-0.177
FBN1	0.172	-0.036	0.23	-0.194	-0.019	-0.989	0.088	0.003	0.009	NA	-0.054	0.044
MS4A2	-0.148	-0.032	0.402	-0.179	0.536	0.262	-0.091	0	NA	0.054	0.092	0.232
FECH	-0.036	-0.926	-0.067	0.031	0.016	0.073	0.11	-0.076	-0.281	0.366	0.142	-0.271
FGFR3	-0.015	-0.032	-0.01	-0.266	0.191	-0.224	-0.113	0.271	0.015	0.112	0.008	0.173
FH	0.125	0.107	0.015	-0.237	0.029	-0.159	0.063	0.084	0.384	0.019	0.156	-0.064
FSHR	0.052	NA	-0.101	0.043	0.021	-0.015	-0.149	NA	0.172	0.159	0.05	NA
FTL	-0.064	0.094	-0.07	0.016	0.079	-0.168	0.04	0.113	0.024	0.029	-0.179	-0.53
FUCA1	0.141	0.204	-0.192	-0.043	0.095	0.034	0.044	-0.495	0.16	0.03	-0.04	-0.24
FUT1	-0.052	-0.144	-0.01	0.067	-0.024	-0.122	0.017	-0.317	-0.093	NA	-0.034	-0.178
G6PC	0.008	-0.07	-0.001	-0.006	0.104	-0.008	-0.103	0.027	-0.047	0.096	0.039	0.006
GALK1	0.03	-0.047	-0.006	0.122	-0.014	0.161	0.043	-0.182	-0.038	0.079	-0.102	-0.093
GALT	0.078	0.004	-0.014	-0.002	0.065	0.082	0.071	-0.142	0.353	0.134	0.107	0.004
GAMT	0.035	-0.293	0	0.027	0.111	0.102	-0.013	-0.118	-0.031	0.273	-0.048	-0.131
GBE1	-0.068	0.029	-0.066	-0.114	-0.06	-0.018	0.003	-0.131	0.205	0.018	0.121	-0.018
GCDH	0.039	-0.11	-0.051	-0.045	-0.116	0.001	-0.025	-0.125	-0.19	0.072	-0.047	0
GCH1	0.023	-0.91	0.065	-0.441	-0.173	-0.538	0.101	-0.959	0.069	-0.125	0.095	-0.301
GHR	-0.138	-0.073	-0.169	-0.039	0.02	-0.049	-0.392	0.003	0.068	-0.088	-0.167	-0.125
GIPR	-0.047	-0.057	-0.026	0.037	0.047	0.004	-0.071	0.022	0.002	0.043	-0.029	0.09
GLI3	-0.136	-0.329	-0.036	-0.043	0.165	0.031	-0.241	0.057	-0.269	0.397	-0.201	0.137
GLA	-0.015	-0.12	0.132	-0.155	0.002	0.143	0.04	0.069	0.053	0.195	0.056	0.089
GLDC	0.273	0.364	-0.145	-0.232	0.394	-0.014	0.315	0.025	-0.244	-0.012	-0.226	0.283
GLRA1	0.229	NA	-0.561	0.201	-0.559	2.135	-0.226	NA	NA	0.124	0.105	NA
GP1BA	0.079	0.009	-0.003	0.095	0.052	-0.008	-0.013	-0.196	-0.061	-0.082	-0.054	0.114
GP9	-0.094	-0.014	0.191	-0.035	-0.205	0.077	-0.1	-0.07	0.028	-0.106	0.092	0.051
GPI	-0.028	-0.026	-0.033	-0.076	-0.264	-0.104	0.09	-0.181	-0.214	0.154	0.054	-0.056
GSN	0.067	-0.718	0.037	0.101	-0.155	-0.007	0.133	0.151	0.022	0.061	0.039	-0.104
GSS	0.1	-0.021	-0.031	-0.033	0.087	-0.038	0.077	-0.225	0.211	0.017	0.206	-0.031
MSH6	-0.053	0.055	0.065	0.07	-0.003	-0.127	-0.094	0.084	0.224	0.217	-0.19	-0.016
GUCY2D	-0.01	0.08	0.057	0.091	-0.001	0.057	0.002	-0.001	-0.015	0.218	-0.089	0.14
GUSB	0.021	0.036	0.108	0.034	-0.089	-0.057	0.065	-0.109	-0.13	0.029	0.093	-0.032
HADHA	0.039	-0.702	0.005	0.011	-0.159	-0.276	0.114	-0.213	-0.074	-0.009	-0.091	0.041
HADHB	0.083	-1.77	0.062	-0.029	-0.11	0.143	0.126	0.211	0.009	NA	-0.057	0.011
SERPIND1	-0.042	-0.087	-0.072	0.097	-0.028	0.168	-0.153	-0.018	-0.05	0.023	0.029	0.192
HK1	-0.006	0.375	-0.083	-0.031	-0.219	-0.101	0.176	-0.106	0.023	-0.046	0.174	-0.034
HK2	0.035	0.189	0.052	0.032	-0.241	-0.274	-0.104	0.264	0.018	0.089	0.042	0.061
HMGCL	0.032	-0.164	-0.227	-0.048	0.135	0.217	0.21	0.046	0.147	0.056	0.097	-0.235
SHH	0.069	0.124	0.047	-0.101	0.074	0.145	-0.092	-0.138	-0.267	0.416	0.314	0.242
HPS1	0.024	-0.303	0.058	0.21	0.462	0.17	-0.117	-0.148	0.274	-0.009	-0.105	0.064
HSD11B2	0.241	-0.307	0.021	0.118	-0.148	0.003	0.059	0.134	-0.007	-0.039	-0.126	0.102
HSD17B3	0.005	-0.398	-0.347	0.199	0.054	-0.702	0.152	0.075	-0.086	NA	0.029	0.065
HSD3B2	0.119	0.092	0.014	0.195	0.171	0.09	0.071	-0.16	-0.021	NA	-0.006	0.01
SGSH	0.086	-0.039	0.005	0.105	0.386	0.264	0.357	0.119	-0.022	-0.171	-0.133	-0.097
HTN3	0.054	0.115	0.046	0.016	0.039	-0.035	0.072	-0.197	-0.082	NA	-0.004	-0.088
ICAM1	0.221	-0.243	-0.009	0.064	-0.172	-0.023	0.015	0.105	0.153	-0.168	0.102	0.056
IDS	-0.042	0.218	-0.086	-0.075	-0.199	-0.088	0.041	0.045	-0.023	NA	0.042	0.002
IDUA	-0.033	-0.066	-0.024	-0.018	0.037	0.102	-0.086	-0.135	-0.109	0.135	-0.029	0.179
IL2RG	0.026	-0.053	-0.039	0.004	0.127	-0.021	-0.076	-0.065	-0.086	0.053	0.013	-0.037
PDX1	0.073	-0.003	0.031	-0.095	0.135	-0.014	-0.045	-0.072	0.119	-0.194	-0.104	-0.106
ITGA6	0.065	0.448	0.061	0.058	0.343	0.074	0.063	-0.13	0.084	-0.214	-0.032	0.309
ITGB3	0.112	-0.077	0.066	-0.021	-0.069	-0.051	-0.009	-0.019	0.036	-0.163	0.11	-0.239
ITGB4	0.117	-0.021	0.027	0.035	-0.099	-0.2	-0.061	0.161	-0.014	NA	0.04	-0.001
JAK3	-0.036	0.074	-0.102	0.025	0.079	-0.115	-0.069	-0.271	-0.004	-0.059	-0.049	0.236
KAL1	-0.689	-0.096	0.439	-0.108	0.218	0.075	0.143	-0.656	-0.375	0.014	-0.187	0.006
KCNA1	0.015	-0.367	-0.145	0.014	1.624	-0.375	-0.185	-0.108	-2.127	0.014	0.265	-0.06
KHK	0.044	0.07	0.009	-0.061	0.179	-0.239	0.098	-0.233	0.137	NA	-0.097	-0.062
KRT12	0.015	-0.091	0.21	-0.258	-0.48	-0.12	0.147	0.054	6.562	NA	0.082	-0.206
KRT9	-0.014	0.034	0.103	0.03	-0.012	-0.057	-0.183	0.122	0.042	0.027	-0.001	-0.037
LCAT	0.103	-0.103	0.007	0.077	-0.041	0.067	0.07	0.188	0.036	0.083	0.029	0.085
LEP	0.01	0.074	-0.035	0.124	0.109	0.106	-0.336	0.202	0.33	0.09	-0.114	0.254
SGCG	-0.29	0.047	0.202	-0.087	-0.234	0.324	-0.082	0.025	-0.061	0.198	-0.128	0.055
SGCB	0.042	0.009	0.036	-0.107	-0.352	0.025	0.024	-0.354	-0.1	NA	0.072	0.291
LHCGR	-0.401	-0.068	0.014	0.326	-0.467	0.004	0.127	-0.105	NA	-0.267	0.212	-0.149
LIG1	0.012	0.063	-0.001	0.073	-0.099	-0.174	0.045	-0.099	-0.071	0.015	-0.027	-0.017
LPL	-0.013	-1.128	0.053	0.283	-0.194	-0.002	-0.185	0.314	-0.233	-0.132	-0.171	0.098
LYZ	0.115	0	-0.009	-0.07	-0.061	0.053	-0.035	0.094	0.314	-0.131	0.006	0.093
MAOA	-0.536	0.705	-0.032	-0.013	-0.011	0.239	-0.017	-0.145	0.141	-0.297	0.139	-0.12
MEFV	-0.054	-0.212	0.081	0.067	0.057	0.146	0.007	0.203	-0.299	-0.103	0.036	-0.152
CIITA	0.059	-0.19	-0.004	0.054	0.004	0.065	-0.02	-0.355	0.052	NA	0.023	0.346
MITF	-0.261	-0.013	0.134	-0.205	-1.191	0.151	-0.027	0.176	-0.137	NA	0.301	-0.252
MLH1	-0.097	-0.279	-0.176	-0.076	-0.003	0.096	0.111	-0.083	-0.099	0.01	0.022	-0.061
MPO	0.05	-0.123	0.139	-0.068	0.145	-0.046	-0.018	0.003	0.35	0.133	-0.072	-0.029
MSH2	-0.271	0.156	-0.066	0.143	0.126	-0.598	0.072	0.05	0.057	0.101	0.179	0.004
MTM1	-0.133	0.027	-0.025	-0.112	-0.128	0.017	-0.002	-0.03	-0.654	0.012	0.009	-0.021
MTTP	-0.037	0.069	-0.04	-0.227	0.293	-0.126	-0.061	0.107	0.266	NA	0.009	0.075
MTR	0.204	-0.352	0.267	-0.422	0.111	-1.034	0.062	0.282	-0.018	-0.081	-0.06	-0.154
MUT	0.083	0.043	-0.151	-0.032	0.047	0.151	0.022	-0.142	0.249	0.079	0.049	0.151
MYH7	-0.034	0.003	-0.11	0.001	0.164	-0.02	0.298	-0.818	-0.086	-0.041	0.034	0.008
MYL3	0.005	0.055	0.01	0.141	0.041	-0.055	-0.067	-0.247	-0.113	0.037	-0.027	0.143
MYO7A	0.055	-0.087	0.101	-0.084	-0.036	0.08	-0.087	0.199	0.164	NA	-0.082	-0.051
MYOC	-0.133	0.226	-0.265	0.064	0.292	-0.003	-0.094	-0.012	0.872	0.386	0.033	-0.057
NAGA	0.014	-0.023	-0.021	-0.202	0.048	-0.218	-0.065	-0.072	-0.013	0.087	0.014	0.028
NAGLU	-0.081	0.102	0.069	0	-0.105	0.116	-0.009	-0.109	-0.091	-0.001	0.016	-0.138
NDP	0.222	-0.225	-0.327	-0.053	0.132	0.219	0.136	0.242	NA	-0.209	0.118	-0.253
NP	0.21	-0.676	0.236	0.228	-0.105	0.143	0.008	-1.41	-0.054	-0.28	0.021	0.051
NPC1	0.267	0.158	0.384	-0.211	-0.467	-0.071	0.041	0.015	0.011	NA	0.041	0.168
GPR143	0.142	-0.046	-0.112	-0.27	-0.454	0.067	0.183	-0.006	-0.186	0.275	0.367	0.021
OAT	-0.006	-0.149	0.043	0.098	0.032	0.047	-0.017	-1.238	0.114	0.042	0.104	0.067
OCA2	-0.399	-0.287	0.151	0.016	-0.03	-0.087	0.002	0.358	0.191	0.564	0.098	-0.138
PAH	-0.076	-0.381	0.338	-0.279	-0.758	0.09	0.056	0.85	2.797	0.025	-0.295	0.176
PCBD1	0.083	0.107	0.026	-0.016	0.038	-0.005	-0.05	-0.041	-0.02	0.13	-0.057	-0.023
PDHA1	0.029	0.224	0.088	0.014	0.059	-0.34	-0.267	-0.003	0.197	0.012	0.062	-0.167
PEPD	0.025	0.145	-0.019	-0.05	-0.023	0.091	0.047	-0.049	-0.181	-0.023	-0.091	-0.048
PEX12	0.019	0.015	0	0.025	0.327	-0.036	0.235	0.319	0.235	-0.016	0.065	0.074
PEX6	0.094	0.024	0.073	0.037	-0.041	-0.259	-0.096	-0.183	0.192	0.484	0.003	0.135
PEX7	-0.07	0.397	-0.029	0.037	0.044	0.034	0.06	-0.146	0.208	0.082	-0.347	-0.042
PFKM	-0.106	0.389	-0.137	0.086	-0.006	0.245	0.198	0.103	0.166	0.01	0.014	-0.113
PGAM2	0.066	-0.069	-0.024	0.007	-0.042	-0.053	0.035	0.119	-0.024	-0.042	0.044	-0.005
PGK1	-0.045	-0.008	-0.02	0.094	-0.127	-0.287	0.009	-0.018	-0.046	NA	0.019	0.026
PHKA2	-0.034	0.224	-0.012	0.015	-0.019	-0.168	0.086	0.053	-0.308	0.17	0.079	-0.103
PHKB	0.011	-0.061	0.031	-0.023	0.027	-0.087	-0.092	0.131	0.034	-0.136	0.027	-0.124
PHKG2	0.084	0.027	-0.015	0.023	-0.028	-0.028	0.048	0.004	-0.043	NA	-0.021	-0.034
PKD2	-0.204	0.176	-0.367	0.395	-0.058	-0.077	0.076	-0.546	0.183	0.799	-0.02	-0.226
PKLR	0.057	0.08	-0.019	0.024	0.085	0.118	-0.02	-0.02	-0.1	-0.121	0.038	-0.052
PKP1	-0.741	-0.025	0.433	-0.051	-0.989	0.051	0.041	0.284	-0.201	0.094	0.148	-0.058
PLA2G2A	0.047	0.266	-0.079	0.39	0.055	-0.15	0.361	-0.25	NA	-0.051	-0.048	0.167
PLG	0.026	-0.082	-0.392	0.424	0.035	0.112	-0.116	0.212	-0.028	NA	-0.001	-0.179
PLOD1	0.184	-0.065	0.029	0.091	0.065	0.055	-0.286	-0.146	0.017	-1.527	0.089	-0.038
PMM2	0.088	-0.227	0.05	0.072	0.188	0.04	-0.286	0.353	0.027	0.015	-0.07	0.132
PMP22	-0.137	-0.173	0.169	-0.28	-0.022	-0.693	-0.018	0.188	-1.173	-0.055	0.179	0.017
PPOX	0.006	0.198	-0.198	0.135	-0.059	-0.273	0.113	-0.068	-0.046	0.011	-0.083	-0.146
PROC	-0.087	0.153	0.01	0.143	-0.033	0.044	-0.022	-0.019	-0.008	0.28	0.08	0.031
PTEN	-0.045	0.205	-0.016	-0.228	0.006	0.093	0.029	-0.002	0.085	NA	0.061	0.076
PTH	-0.133	-0.01	0.099	0.038	0.178	-0.196	0.17	-0.074	-0.114	0.015	-0.016	0.024
PTH1R	0.199	0.135	-0.105	0.142	0.142	0	0.097	0.059	0.007	-0.246	-0.142	0.061
PTS	-0.071	0.085	0.132	0.08	-0.118	0.317	-0.131	0.259	0.047	0.096	0.104	0.047
QDPR	-0.176	-0.309	-0.183	-0.049	0.022	0.1	0.023	0.004	0.105	-0.204	-0.138	-0.07
RB1	-0.559	0.059	0.009	-0.058	-0.044	-0.097	-0.149	0.001	0.109	0.01	-0.069	0.095
PRPH2	0.254	-0.283	-0.138	-0.134	0.091	0.198	-0.03	-0.068	0.04	-0.189	0.077	-0.246
RHAG	0.05	0.146	0.159	-0.189	-0.392	0.196	-0.295	-0.298	0.018	0.018	0.24	-0.161
PITX2	0.168	-0.204	-0.09	0.25	-0.021	0.102	0.044	0.23	0.014	0.148	-0.138	0.042
RLBP1	-0.512	NA	0.06	0.45	0.402	-0.062	0.548	NA	NA	-0.354	-0.068	NA
ROM1	-0.013	0.044	-0.042	0.021	0.276	0.26	0.179	0.38	0.244	0.086	0.081	0.018
RPE65	-0.594	-0.208	0.16	0.505	0.345	-0.147	-0.116	-0.021	0.258	0.094	-0.016	0.363
RS1	0.08	NA	0.223	0.231	0.053	0.811	-0.346	NA	NA	-0.004	-0.581	NA
SAA1	-0.124	-0.239	0.06	0.136	-0.492	0.684	-0.143	0.252	-0.179	NA	-0.115	-0.05
ATXN1	0.44	0.778	-0.032	0.381	0.301	0.322	-0.321	0.299	0.85	-0.077	0.005	0.305
ATXN7	0.055	NA	0.063	0.136	-0.058	-0.064	-0.082	NA	-0.58	-0.063	-0.271	-0.015
SCN4A	0.052	-0.037	0.095	-0.176	0.013	-0.067	0.059	0.037	-0.149	NA	0.089	-0.205
SCNN1B	0.101	-0.049	0.085	0.002	-0.016	-0.01	-0.135	-0.064	0.116	0.058	0.067	-0.021
SLC12A1	-0.962	0.16	0.606	-0.118	-0.189	0.03	0.517	0.15	1.143	-0.109	-0.196	0.335
SLC2A2	-0.121	0.12	0.026	0.186	0.313	-0.194	-0.036	-0.31	0.266	-0.079	0.106	-0.082
SLC3A1	-0.105	0.023	-0.122	0.031	-0.029	0.009	0.109	0.036	0.076	-0.028	0.061	0.368
SLC4A1	0.039	-0.035	0.015	0.03	0.102	-0.043	-0.101	-0.23	-0.153	0.106	-0.059	0.007
SLC5A1	0.104	0.056	-0.158	-0.149	-0.308	0.039	-0.052	0.014	-0.02	0.071	0.078	-0.066
SNCA	0.007	-0.378	0.095	-0.026	-0.121	0.034	-0.375	0.143	-0.14	0.08	0.09	-0.016
SOX9	0.077	0.043	0.071	0.061	0.031	-0.016	-0.022	-0.077	-0.027	-0.162	0	-0.079
STAR	-0.029	1.623	-0.112	0.62	-0.466	0.123	0.029	-0.29	NA	0.407	-0.233	-0.088
ABCA4	0.022	0.251	-0.02	0.159	-0.15	0	-0.018	-0.298	0.117	1.322	-0.235	0.01
STS	-0.181	0.104	-0.03	0.019	-0.321	0.033	-0.061	-0.226	0.157	-0.298	0.102	0.262
ABCC8	0.007	-0.136	-0.032	0.009	-0.205	0.031	-0.115	0.043	-0.063	0.056	-0.011	0.025
TAT	0.023	0.289	-0.082	-0.033	0.075	-0.087	0.157	0.021	0.109	NA	0.08	-0.108
TCN2	0.092	0.145	-0.064	0.126	-0.027	0.083	0.116	0.04	-0.102	-0.081	-0.121	0.219
TGFBI	-0.046	-0.193	0.097	0.303	0.029	-0.317	0.006	-0.319	-0.559	0.173	-0.274	-0.059
TGM1	-0.297	0.21	0.157	-0.073	-0.071	-0.341	-0.181	0.146	0.139	0.486	-0.252	-0.132
TIMP3	0.075	-0.764	-0.578	0.294	0.356	-0.035	-0.038	-1.619	0.157	0.097	0.172	0.241
TNNI3	-0.111	0.343	-0.004	0.214	-0.24	-0.094	0.087	-0.248	0.018	-0.026	-0.007	0.108
TPI1	0.02	0.112	0.012	0.07	-0.203	-0.191	-0.085	0.036	-0.221	NA	-0.014	-0.02
TPMT	0.128	NA	-0.222	0.131	0.107	-0.03	0.158	NA	0.009	-0.478	-0.018	NA
TSC1	0.062	0.367	-0.005	0.057	-0.064	0.045	0.2	0.015	-0.064	0.201	-0.014	0.023
TSHR	-0.172	0.02	-0.149	0.084	0.532	-0.068	0.156	0.02	-0.629	0.298	0.074	-0.157
TTPA	0.304	NA	-0.011	0.073	0.264	-0.081	-0.03	NA	NA	0.013	-0.217	NA
TTR	-0.025	-0.038	0.007	0.038	-0.373	0.268	-0.052	0.511	NA	0.257	-0.236	0.265
TYR	-0.222	0.015	0.068	-0.432	0.126	-0.023	-0.078	0.039	1.01	-0.034	0.23	0.017
UMPS	0.043	-0.651	0.21	-0.038	-0.016	0.053	-0.078	-0.024	-0.294	0.159	-0.076	-0.032
UROD	-0.058	-0.226	-0.038	0.143	-0.086	0.029	0.064	0.001	-0.075	-0.082	0.145	-0.067
UROS	0.144	0.165	0.034	-0.035	-0.214	0.109	0.177	-0.263	0.236	-0.328	0.071	-0.128
WAS	0.015	0.082	-0.122	0.008	0.174	-0.102	0.069	-0.02	0.025	0.051	0.081	-0.105
XDH	0.045	0.068	0.032	-0.181	0.405	0.048	-0.035	0.136	0.369	-0.034	-0.027	0.017
XPA	0.1	-0.208	0.026	-0.057	0.08	0.068	0.132	0.201	0.266	-0.123	0.149	-0.109
APOB	-0.013	0.105	0.055	-0.158	0.057	-0.125	0.018	-0.463	-0.659	0.019	0.236	0.03
BLMH	-0.081	-0.232	0.085	-0.104	0.072	-0.381	0.151	0	-0.071	0.186	0.031	0.077
SLC25A20	-0.473	-0.186	-0.095	-0.25	0.034	-0.21	0.219	-0.02	0.201	0.243	-0.006	0.117
CASR	-0.03	0.056	-0.179	0.17	-0.146	-0.081	-0.134	0.068	-0.054	-0.417	-0.136	0.002
CDKN1A	-0.821	0.219	0.13	-0.04	-0.619	0.062	0.039	0.751	-0.179	-0.752	0.009	0.223
CHM	-0.048	-0.04	-0.189	-0.154	0.159	0.091	-0.05	0.207	-0.337	0.363	0.023	0.24
TPP1	0.265	-0.723	0.205	0.129	-0.148	0.092	0.128	0.177	0.021	0.039	0.041	-0.046
ABCC2	-0.028	-0.008	0.12	-0.179	0.219	-0.016	0.119	0.154	0.094	0.33	0.248	-0.095
COL5A2	-0.193	-0.367	0.048	-0.09	-0.195	0.09	0.047	-0.182	0.281	0.096	0.136	-0.011
CRYAA	-0.006	-0.022	0.047	-0.004	0.215	-0.026	-0.067	-0.033	0.051	-0.005	-0.03	0.024
CSF2RB	0.04	0.024	-0.083	0.024	-0.023	0.003	-0.042	0.056	-0.117	0.049	-0.033	0.075
CTSK	0.298	-0.101	-0.078	-0.138	0.322	0.087	-0.045	0.047	0.273	0.076	-0.002	-0.028
CYBB	0.037	-0.094	-0.103	0.08	-0.025	0.054	0	-0.023	0.133	NA	0.054	-0.018
ERCC2	0.06	0.156	-0.023	0.081	0.097	0.055	0.099	-0.184	0.036	0.166	0.058	-0.035
GM2A	-0.181	0.284	-0.004	-0.006	-0.038	0.333	-0.086	-0.049	-0.144	-0.619	0.11	-0.115
GPD2	-0.431	-0.793	-0.246	0.079	0.041	-0.037	0.278	-0.901	-0.253	0.084	-0.158	0.088
GUCA1A	-0.171	0.007	0.004	0.121	0.204	-0.02	-0.031	-0.123	-1.438	0.161	-0.001	0.202
HLCS	0.026	-0.034	-0.073	0.021	-0.05	-0.145	-0.016	0.079	0.027	0.299	-0.01	0.059
HRG	0.028	-0.158	-0.052	-0.048	-0.143	-0.053	0.101	0.112	0.038	-0.01	0.012	-0.013
HSD17B1	0.047	-0.006	0.006	-0.092	0.155	0.05	-0.033	-0.165	0.038	-0.01	0.013	-0.217
HSD17B4	0.04	0.199	0.076	-0.086	0.105	-0.213	0.064	-0.327	0.064	NA	-0.197	-0.131
IAPP	0.204	0.107	-0.895	0.805	-0.375	-0.15	-0.15	0.283	-4.496	-0.001	0.12	0.847
IFNGR1	0.052	0.152	0.058	0.135	0.324	-0.213	0.039	-0.016	0.435	0.11	-0.204	0.203
IL2RA	-0.282	-0.027	-0.1	0.102	0.248	-0.159	0.115	0.089	-0.746	0.416	0.225	-0.201
IL4R	-0.198	-0.002	0.101	-0.032	1.041	0.363	-0.121	-0.129	0.238	0.036	-0.177	0.26
ITGA2B	0.065	-0.066	-0.099	0.045	0.061	0.057	-0.108	0.241	-0.085	NA	0.083	0.023
KEL	-0.183	-0.134	0.177	0.322	0.234	0.122	-0.138	0.018	0.091	-0.091	-0.158	-0.132
KRT17	0.002	-0.257	-0.145	-0.268	-0.66	-0.73	-0.1	-0.121	-0.456	NA	0.024	-0.673
KRT2	0.133	0.018	-0.184	-0.153	0.092	-0.058	-0.04	-0.217	0.135	-0.012	-0.056	-0.011
KRT5	0.008	0.123	0.046	0.055	0.131	0.042	0	-0.081	-0.077	0.106	0.113	-0.038
LOR	0.021	0.252	-0.097	0.066	0.076	-0.017	0.112	0.068	-0.002	-0.035	-0.057	-0.145
LTBP2	0.045	0.202	-0.082	0.006	0.036	-0.011	-0.053	-0.043	0.015	0.124	-0.026	-0.084
MAT1A	0.009	-0.101	0.056	-0.097	0.142	0.036	-0.071	0.058	0.068	0.125	-0.089	0.025
PAFAH1B1	-0.067	0.26	-0.137	-0.01	-0.055	0.095	0.34	0.239	0.057	0.144	0.113	0.071
MYL2	0.146	-0.029	0.003	-0.047	0.108	0.112	-0.093	-0.12	-0.169	0.09	0.036	0.074
NOTCH3	0.012	-0.035	0.112	-0.073	0.15	0.053	-0.049	-0.1	0.039	NA	0.059	0.095
OXCT1	0.033	0.015	0.027	0.066	-0.011	0.077	0.048	-0.138	-0.058	-0.253	-0.018	-0.243
PAFAH2	-0.105	0.645	0.155	0.101	-0.026	0.265	0.01	-0.032	0.209	0.415	-0.07	-0.064
PCSK1	-0.37	-0.248	-0.227	0.029	0.691	-0.18	0.202	-0.42	0.511	-0.113	-0.037	0.038
PDE6A	0.068	0.164	-0.142	0.017	-0.098	0.121	-0.189	-0.184	-0.005	0.091	-0.029	-0.05
SLC26A4	-0.223	-0.058	-0.334	0.364	-0.087	-0.113	-0.145	-0.255	-0.254	0.069	-0.341	0.032
ABCB4	-1.266	0.185	0.867	0.262	0.013	0.331	-0.107	0.013	1.533	NA	-0.153	0.175
PHEX	-0.119	0.223	0.289	-0.179	0.769	-0.027	0.171	0	0.186	0.204	0.292	0.051
PON1	0.299	NA	-0.086	0.098	0.263	0.183	0.13	NA	-1.562	-0.172	0.061	NA
RAG1	0.106	0.139	-0.095	0.081	0.137	0.07	-0.079	-0.039	-0.204	-0.214	-0.08	0.057
SELE	0.376	0.065	-0.002	-0.061	0.424	-0.308	0.183	-0.059	-0.582	-0.032	0.26	-0.216
SLC10A2	0.103	-0.751	-0.161	0.153	-0.105	-0.305	0.138	0.02	0.079	0.116	0.016	-0.102
SLC5A5	-0.015	0.031	-0.005	-0.328	0.336	0.002	0.083	0.01	0.028	0.078	0.096	0.119
SOD1	0.051	0.134	0.115	-0.033	-0.057	-0.21	-0.292	0.108	0.082	0.152	0.056	NA
STK11	0.098	0.142	-0.045	0.025	0.29	-0.004	-0.067	0.024	-0.032	0.062	0.12	-0.052
SUOX	-0.043	0.209	-0.019	0.036	-0.009	0.134	-0.011	-0.089	0.027	0.064	0.009	-0.067
HNF1B	0.118	0.226	0.064	-0.025	-0.022	-0.079	0.049	-0.043	0.161	NA	-0.085	0.044
TEK	0.136	-0.163	0.091	-0.139	-0.546	-0.114	0.189	0.202	0.06	0.24	-0.126	-0.195
THPO	0.101	-0.028	0.113	-0.1	-0.046	-0.027	0.124	0.014	-0.376	-0.06	-0.058	0.01
UBE3A	-0.027	-0.147	0.15	-0.256	-0.053	-0.112	0.014	0.289	0.054	0.169	-0.054	-0.025
BARD1	-0.184	-0.103	-0.082	0.304	-0.148	0.215	-0.029	0.21	-0.004	-0.079	-0.053	0.084
PEX1	-0.025	-0.11	-0.266	-0.153	0.167	0.008	0.112	0.032	0.29	0.435	0.006	-0.04
TWIST1	0.097	NA	-0.307	0.117	-0.608	-0.447	-0.26	NA	6.556	-0.101	0.144	NA
NR0B1	0.026	NA	0.713	-0.29	-0.293	0.111	-0.104	NA	0.185	0.756	-0.067	NA
AK1	0.072	-0.058	-0.033	0.046	-0.059	0.03	-0.029	0.041	0.032	-0.001	0.031	0.075
ALB	0.171	-0.241	0.05	0.171	0.025	-0.093	-0.05	0.055	0.016	NA	-0.127	0.217
ALPL	0.112	0.036	-0.095	0.114	0.261	0.018	-0.046	0.21	0.189	-0.051	0.023	-0.153
AMH	-0.264	-0.172	-0.104	0.121	0.214	0.166	0.051	0.087	0.221	-0.15	0.212	0.04
AMPD3	0.104	0.095	0.235	-0.411	-0.107	-0.224	0.213	-0.059	0.045	-0.053	0.275	-0.055
APOC2	-0.034	-0.02	0.004	0.025	0.052	0.016	0.059	-0.018	-0.019	-0.008	0.02	-0.036
AQP2	-0.014	-0.035	0.019	-0.056	0.026	-0.002	-0.076	-0.197	-0.058	-0.013	-0.01	-0.027
SERPINC1	0.123	0.047	-0.052	0.056	-0.356	0.232	-0.141	-0.182	NA	0.075	-0.045	-0.064
C1QB	0.054	-0.063	0.041	0.025	-0.072	0.039	-0.074	0.084	-0.018	0.23	-0.035	-0.065
CFTR	-0.114	-0.037	0.181	-0.08	0.194	-0.108	0.16	0.162	0.194	-0.434	-0.024	-0.007
COL10A1	0.008	-0.178	-0.155	-0.046	-0.325	-0.08	0.309	-0.162	-0.606	0.213	0.358	0.037
COL17A1	0.021	-0.451	0.017	0.022	0.178	0.125	-0.118	-0.019	-0.018	-0.61	-0.106	-0.001
CRYBB2	0.089	0.08	-0.03	0	-0.095	0.045	0.009	0.082	-0.147	NA	0.049	0.007
CYP11B2	0.094	0.074	0.025	-0.083	0.02	0.208	-0.135	-0.092	-0.195	-0.314	-0.084	0.151
CYP1A1	-0.004	-0.136	-0.148	0.088	0.04	0.185	0.167	0.071	0.289	-0.198	0.097	-0.056
EPX	-0.27	0.281	0.11	0.027	-0.041	-0.014	-0.027	0.035	-0.181	NA	0.069	-0.444
F10	-0.015	-0.027	0.048	-0.165	-0.114	-0.173	0.203	-0.199	-0.002	0.124	-0.012	-0.006
F12	-0.017	NA	-0.024	-0.024	0.03	-0.022	0.103	NA	-0.012	0.095	0.036	NA
F2	0.163	0.033	-0.111	-0.066	0.091	-0.368	0.093	0.196	0.026	0.534	0.221	0.127
FBP1	-0.151	0.337	0.085	0.027	0.484	0.114	0.037	-0.244	0.283	-0.672	0.169	-0.192
FGA	0.167	0.068	0.013	0.192	0.309	0.056	-0.336	0.278	-0.233	-0.45	-0.136	-0.088
GALNS	0.124	-0.015	-0.026	0.039	-0.095	-0.086	-0.019	-0.107	0.013	NA	0.009	-0.054
HBA2	0.012	-0.099	-0.045	0.024	-0.025	0.143	0.054	-0.045	-0.046	-0.14	-0.002	0.044
HBB	0.029	-0.143	-0.043	-0.002	0.141	0.063	-0.015	-0.115	-0.075	0.075	-0.166	-0.101
HBD	-0.21	0.126	0.068	0.02	0.262	0.018	0.029	0.051	-0.252	-0.029	-0.031	-0.12
HEXA	0.105	0.123	0.084	0.055	0.009	0.177	0.103	-0.033	-0.06	-0.017	0.05	-0.017
HOXA13	0.129	0.396	-0.049	0.132	0.107	0.295	0.013	-0.289	-0.051	-0.373	-0.419	0.078
HOXD13	-0.189	0.112	0.074	-0.113	0.093	-0.03	-0.027	0.061	-0.21	0.02	0.061	-0.117
KRT14	0.061	-0.029	-0.043	-0.121	-0.253	-0.427	0.008	0.108	-0.502	-0.041	0.088	-0.214
LDLR	-0.269	-0.339	0.291	-0.537	-0.228	0.112	0.079	0.256	0.357	0.095	-0.146	0.017
MAN2B1	-0.011	0.091	0.033	0.024	0.051	0.062	-0.003	-0.288	-0.15	-0.44	0.03	-0.005
MC2R	0.438	-0.001	-0.529	-0.092	-0.255	0.223	0.101	-0.284	6.577	0.019	-0.023	0.032
MPZ	-0.547	0.031	0.025	0.052	-0.092	0.056	-0.074	0.036	NA	0.291	0.072	0.259
OTC	0.081	-0.279	-0.106	0.057	0.155	-0.366	0.245	0.033	-0.005	-0.066	-0.11	0.269
PCCB	0.043	0.101	0.001	-0.032	0.029	-0.157	0.046	-0.181	-0.111	NA	0.098	-0.024
PLP1	0.114	-0.016	0.116	-0.291	-0.208	0.14	-0.176	-0.031	-0.029	-0.481	0.103	-0.156
PMS2	0.207	0.235	0.128	-0.25	-0.054	0.126	0.047	-0.17	-0.01	NA	0.226	-0.08
RAG2	-0.026	0.078	-0.132	0.074	0.327	0.091	0.113	-0.038	0.181	-0.192	0.017	0.013
REN	0.023	-0.052	-0.034	0.097	0.008	0.119	0.08	-0.354	-0.104	0.169	-0.05	-0.166
RFXAP	0.051	-0.336	0.174	0.052	0.011	0.037	0.049	0.275	-0.026	0.31	-0.206	0.228
RHO	-0.052	-0.143	0.039	0.022	-0.022	0.088	0.022	0.064	-0.021	-0.02	-0.01	0.267
SAG	0.259	-0.094	-0.018	-0.107	-0.83	-0.027	-0.063	-0.997	-0.312	0	0.01	-0.058
SFTPB	0.077	-0.009	-0.003	-0.02	0.089	-0.057	-0.064	-0.045	0.019	NA	0.027	0.052
HNF1A	-0.084	NA	0.1	0.074	-0.095	0.094	0.036	NA	-0.311	-0.004	0.304	NA
TSHB	-0.353	-0.258	0.143	-0.003	-0.127	-0.059	0.043	0.096	-0.394	0.215	0.17	-0.315
TYRP1	0.311	0.157	-0.129	-0.308	0.139	0.038	0.185	0.358	0.308	-0.12	0.313	0.079
VWF	0.028	-0.081	-0.088	0.167	0.004	0.014	0.004	-0.094	-0.133	0.047	-0.037	-0.075
WRN	-0.033	-0.118	0.005	-0.051	0.016	0.004	-0.083	0.112	-0.003	0.089	0.054	0.095
CRX	-0.071	-0.074	0.062	0.047	-0.005	-0.099	-0.019	0.003	-0.054	-0.235	-0.084	0.059
GDF5	-0.091	0.127	-0.048	-0.041	0.111	0.085	-0.081	-0.037	0.082	-0.019	0.064	-0.154
HBA1	-0.045	-0.031	0.031	-0.002	-0.009	0.164	-0.02	-0.103	-0.097	-0.108	0.024	0.075
CD53	0.129	0.078	-0.035	-0.114	0.26	0.029	-0.016	0.101	-0.146	-0.382	0.072	-0.017
C8A	0.028	-0.074	-0.123	0.086	-0.095	-0.118	0.047	-0.353	0.098	0.068	0.039	0.19
IL5RA	-0.012	0.019	0.038	-0.059	-0.046	0.007	-0.04	0.069	-0.024	-0.446	0.01	0.106
CRP	0.272	-0.587	0.078	0.206	-0.101	0.075	-0.079	0.538	0.059	-0.095	-0.057	0.581
IL10	-0.124	-0.016	0.026	-0.053	0.027	-0.095	0.203	0.137	0.056	-0.034	-0.15	0.088
CD55	-0.446	0.223	0.231	-0.2	-0.273	0.061	-0.431	0.257	-0.099	-0.293	0.112	-0.099
IL1A	-0.155	-0.138	-0.218	-0.036	0.018	-0.612	0.15	0.28	0.286	-0.31	0.164	0.38
IL1B	0.05	0.11	-0.036	0.074	-0.108	-0.101	-0.114	-0.12	-0.15	0.116	-0.116	-0.041
IL1RN	0.078	-0.111	0.054	0.022	-0.156	0.081	-0.029	0.175	-0.001	-0.718	-0.017	-0.2
SLC11A1	0.018	-0.067	0.012	0.021	-0.173	-0.05	-0.052	0.238	0	-0.091	-0.006	-0.023
SPP1	-0.24	0.099	-0.081	-0.25	0.469	0.311	0.168	-0.117	0.067	0.419	0.336	-0.001
GC	0.829	0.017	-0.027	-0.292	0.141	-0.03	-0.015	-0.116	0.036	NA	-0.122	0.063
IL8	-0.173	-0.285	-0.114	0.031	0.1	1.366	-0.177	-0.243	0.32	0.158	-0.212	-0.028
IL2	0.078	-0.147	0.14	0.191	-0.595	-0.183	-0.066	0.33	NA	0.006	-0.147	-0.021
C7	0.116	-0.062	-0.086	0.036	0.196	0.042	-0.012	-0.028	-0.009	0.107	-0.058	-0.053
IL3	-0.095	-0.013	0.108	0.107	-0.047	0.045	0.078	-0.078	-0.182	-0.132	0.013	-0.026
IL9	-0.071	-0.029	-0.09	-0.006	-0.078	0.005	-0.035	0.743	0.244	-0.061	0.331	-0.048
IGFBP1	0.006	0.355	-0.045	-0.202	0.141	-0.326	0.1	0.138	NA	-0.624	0.307	-0.081
IGFBP2	0.034	0.001	0.068	0.001	-0.017	0.1	-0.081	0.008	-0.006	-0.041	-0.021	0.009
IGFBP5	-0.034	-0.025	0.033	0.078	0.237	-0.063	-0.141	-0.065	0.05	-0.536	0.011	-0.185
IL6	-0.381	-0.439	0.073	-0.35	0.285	-0.453	0.15	-0.471	0.304	0.021	-0.039	-0.343
SERPINE1	0.254	-0.24	-0.319	0.71	-0.404	0.132	0.375	0.077	-0.049	NA	-0.013	-0.369
NOS3	0.049	-0.17	-0.093	0.058	-0.026	0.044	0.012	0.132	-0.081	-0.015	0.029	0.017
C8G	0.069	0.028	0.01	-0.016	-0.045	0.045	-0.009	0.234	0.005	0.186	0.101	-0.107
ORM1	0.101	-0.073	0.003	0.019	0.011	0.063	-0.04	0.046	-0.098	0.063	-0.013	0.04
ORM2	0.151	0.042	-0.005	-0.135	0.134	-0.012	0.046	0.01	-0.121	-0.012	0.136	0.027
CXCL12	0.058	-0.113	0.077	-0.1	-0.028	-0.001	0.016	0.111	0.069	NA	-0.024	-0.105
IGF2	0.119	-0.049	-0.048	-0.112	0.053	-0.096	0.019	-0.103	0.091	-0.051	0.044	0.005
HPX	0.012	-0.163	-0.131	0.136	-0.049	0.045	-0.106	0.054	0.105	-0.075	0.174	-0.036
CNTF	0.146	-0.068	-0.014	-0.024	-0.268	0.042	-0.013	0.025	0.013	-0.055	0.071	0.066
CD4	0.224	-0.169	0.05	-0.111	-0.039	-0.074	-0.002	0.106	0.043	0.072	0.018	0.118
SLC11A2	0.494	0.935	-0.028	0.301	0.453	0.086	-0.058	-0.536	-1.397	NA	-0.745	-0.069
IFNG	-0.338	-0.073	-0.05	-0.025	-0.168	0.047	-0.017	0.277	6.745	-0.299	0.063	-0.049
NOS1	0.092	-0.07	-0.023	0.058	-0.158	-0.119	0.133	0.017	0.239	-0.287	-0.133	-0.05
HTR2A	0.561	0.049	0.323	-0.27	0.006	0.292	-0.009	-0.152	NA	-0.042	-0.001	0.192
BDKRB2	-0.056	0.339	-0.115	0.204	-0.058	-0.16	0.015	0.114	0.377	-0.069	-0.101	-0.035
SERPINA5	-0.002	-0.016	0.002	-0.072	0.176	-0.048	-0.047	0.061	-0.052	-0.105	0.075	0.158
NOS2	-0.053	0.075	0.008	-0.019	0.199	0.078	-0.14	0.015	0.023	0.104	0.162	-0.033
IL10RB	0.136	-0.633	-0.181	0.075	-0.004	-0.115	0.292	-0.005	-0.138	0.078	0.055	-0.094
IFNAR1	-0.019	0.192	-0.001	0.11	0.034	0.051	0.012	-0.132	0.229	NA	-0.054	0.03
ITGAM	0.022	0.112	0.287	-0.184	0.141	0.139	-0.043	-0.035	0.04	-0.088	-0.04	0.218
BCL2	-0.043	-0.129	0.045	-0.199	0.237	0.164	-0.023	0.112	0.186	-0.769	0.14	-0.161
IL8RA	0.046	0.135	0.041	0.034	-0.128	0.088	0.011	0.058	0.126	0.031	0.065	-0.748
SOD2	-0.703	0.053	-0.354	-0.105	-0.479	-0.216	-0.227	0.093	-0.366	0.055	-0.233	0.009
GSR	0.048	0.12	0.113	-0.013	-0.094	0.144	-0.039	0.207	-0.099	0.175	0.129	-0.155
VTN	-0.054	-0.002	-0.116	-0.089	0.224	0.03	-0.116	-0.189	-0.081	0.008	-0.007	-0.094
FASLG	-0.066	0.082	-0.05	0.117	0.1	0.081	-0.14	-0.091	-0.037	0.114	0.06	-0.218
IL11	0.11	-0.079	0.012	0.074	-0.17	0.083	-0.091	-0.33	0.191	-0.327	0.134	0.058
AGL	0.153	0.125	0.135	-0.063	0.224	0.04	0.059	-0.079	0.009	-0.191	0.007	-0.041
CR1	-0.323	-0.076	0.032	0.109	0.054	-0.166	0.161	-0.082	-3.267	0.191	0.184	-0.14
SELL	-0.029	0.035	0.079	-0.067	-0.188	0.259	-0.024	0.142	0.896	-0.179	0.146	-0.295
AIRE	0.032	-0.021	0.018	-0.012	-0.056	0.035	-0.062	0.012	-0.07	-0.097	0.132	-0.085
TGFB1	0.041	-0.005	0.002	-0.021	0.154	-0.023	-0.002	0.074	0.019	0.099	0.021	0.086
RPL9	0.047	0.075	0.035	-0.024	0.038	-0.431	-0.228	0.131	0.158	0.031	0.059	NA
NAT1	0.057	0.215	0.016	0.032	0.166	-0.051	-0.196	-0.419	0.142	-0.086	-0.094	0.22
ABAT	0.083	-0.067	0.08	-0.127	0.151	0.091	0.025	0.002	0.132	0.246	0.034	0.014
ACY1	0.063	-0.284	-0.014	0.195	-0.085	0.095	-0.011	0.026	-0.051	-0.149	-0.064	-0.126
ADH1B	-0.352	-0.101	0.238	0.198	0.026	0.029	0.095	0.462	NA	-0.152	-0.065	0.017
ADH4	0.028	-0.179	0.036	0.217	-0.205	-0.024	-0.08	0.138	-0.028	NA	-0.142	0.208
ADH5	-0.014	-0.024	-0.076	-0.397	0.212	0.092	0.067	0.111	-0.041	-0.06	-0.083	-0.123
ADH7	-0.041	NA	-0.048	-0.043	-0.125	0.139	-0.107	NA	0.677	-0.004	0.051	NA
ADORA2A	-0.067	0.385	0.077	0.069	0.194	-0.057	-0.128	-0.053	0.041	-0.088	-0.041	-0.015
ADORA2B	0.015	0.109	-0.005	-0.156	-0.213	0.322	0.021	0.136	0.093	0.284	0.07	0.181
ADORA3	-0.031	-0.17	0.283	-0.123	0.018	0.105	-0.186	-0.102	-0.003	-0.034	0.02	-0.001
ADRA1D	0.049	NA	-0.021	-0.003	0.047	-0.03	0	NA	-0.054	-0.073	0.042	NA
ADRA1B	-0.037	-0.085	-0.022	-0.039	0.049	-0.003	-0.046	-0.211	-0.085	0.128	0.099	-0.018
ADRA1A	0.032	-0.346	0.058	0.059	0.282	-0.039	0.139	0.189	0.087	0.359	0.013	-0.489
AGTR1	0.258	-0.045	-0.146	0.537	0.202	-0.008	-1.721	0.243	0.111	NA	-0.858	-0.394
AGTR2	1.02	0.251	-0.308	-0.726	-0.862	0.029	-0.376	0.053	NA	-0.02	-0.141	0.403
AHCY	-0.773	0.091	-0.07	-0.002	0.04	0.003	-0.018	-0.112	0.069	0.003	-0.054	-0.136
ALDH1A1	0.279	-0.328	0.172	-0.201	0.351	0.216	0.083	-0.06	0.854	0.025	0.121	0.212
ALDH2	0.023	0.255	-0.024	0.074	0.002	-0.05	0.072	-0.649	-0.099	0.048	-0.029	0.065
ALDH1B1	0.111	-0.289	0.076	-0.031	-0.132	-0.221	0.317	0.078	-0.699	-0.061	0.094	-0.043
ALDH1A3	0.09	-0.068	0.23	0.149	0.189	-0.449	-0.737	0.249	0.064	0.506	0.122	-0.048
ALDH9A1	0.228	-1.007	0.052	0.128	0.059	0.229	0.056	0.086	0.018	0.051	-0.573	-0.642
ALOX12	-0.262	0.048	0.116	0.195	0.125	0.142	0.059	0.089	0.218	0.15	-0.099	-0.04
ALOX5	0.025	0.108	-0.001	-0.017	0.146	-0.059	0.227	-0.007	0.054	0.078	0.266	0.122
ANXA1	-0.131	0.055	0.067	-0.029	0.139	0.172	0.06	-0.152	0.344	0.074	0.283	0.311
ATP1A1	0.082	-0.766	0.045	0.034	0.202	0.082	0.009	-0.418	-0.008	-0.224	0.255	-0.083
ATP1A2	-0.076	-0.251	0.287	0.055	0.187	0.025	0.246	0.109	-0.246	0.346	-0.155	-0.11
ATP4A	0.008	-0.16	0.049	0.231	-0.109	0.144	-0.068	-0.022	-0.036	0.062	-0.122	-0.069
ATP4B	-0.086	0.125	-0.006	-0.222	-0.218	-0.197	-0.073	0.001	-0.118	0.122	0.141	0.298
AVPR1A	0.152	-0.058	-0.022	0.124	0.005	0.177	-0.2	-0.09	-0.126	0.246	-0.066	0.548
AVPR1B	0.226	-0.083	0.014	-0.145	-0.092	0.058	0.075	0.047	0.175	NA	-0.06	-0.27
BCKDHA	0.071	-0.116	-0.015	0.051	-0.004	0.058	0.154	-0.046	0.163	0.058	0.007	-0.04
BDKRB1	-0.266	-0.081	0.05	-0.015	0.23	-0.186	-0.125	-0.059	0.008	0.049	0.143	0.023
BLVRA	0.042	-0.01	-0.034	-0.002	-0.055	-0.087	-0.144	0.008	0.099	0.139	-0.008	0.052
BLVRB	0.012	0.068	0.02	-0.03	0.143	0.028	-0.053	0.045	-0.066	0.097	0.015	-0.011
TSPO	-0.007	-0.03	-0.08	-0.015	-0.13	0.027	-0.017	0.012	0.034	0.047	-0.046	0.027
C4BPA	-0.112	-0.017	0.003	0.598	0.2	0.113	-0.285	-0.333	-6.753	0.037	-0.172	0.633
CA4	0.29	-0.146	0.077	-0.625	-0.346	0.026	0.067	0.365	2.861	0.002	0.085	-0.132
CACNA1B	0.31	-0.005	0.243	-0.353	-0.152	0.394	-0.23	0.013	-0.849	0.03	-0.169	0.113
CACNA1E	-0.086	0.204	-0.159	0.092	0.115	-0.043	0.1	-0.144	-0.079	-0.001	0.121	0.026
CACNA2D1	0.114	0.095	-0.079	-0.132	0.222	-0.11	0.039	-0.229	0.048	-0.074	0.089	-0.033
CACNB1	0.009	0.008	-0.081	0.016	0.026	0.002	-0.03	0.064	-0.025	-0.128	-0.085	0.179
CACNB3	0.034	-0.081	0.019	0.004	0.067	0.001	0.085	-0.009	0.002	-0.409	0.037	-0.126
CACNG1	0.043	0.023	0.06	0.054	-0.107	0.045	0.043	-0.035	-0.07	-0.002	-0.123	0.086
CALCB	NA	NA	NA	NA	NA	NA	NA	NA	NA	-0.119	NA	NA
CCK	0.262	0.197	-0.113	-0.269	0.097	0.131	-0.011	-0.421	0.012	-0.217	0.051	0.144
CCKAR	-0.097	0.068	-0.031	0.083	-0.283	0.049	0.107	-0.125	-0.016	0.066	0.099	0.009
CD3D	0.101	0.107	0.392	-0.167	-0.33	0.349	0.058	-0.302	0.518	0.313	-0.141	0.323
CD3E	0.098	0.044	0.066	-0.091	0.188	-0.002	-0.105	0.042	0.009	0.043	0.058	0.076
CGA	0.073	-0.26	-0.022	-0.318	0.074	0.242	-0.135	-0.1	0.11	-0.044	0.423	-0.019
CHRM3	-0.093	-0.188	0.043	0.135	0.019	0.11	-0.027	-0.067	-0.195	0.265	-0.084	-0.158
CHRNA2	0.036	0.186	-0.133	0.028	0.396	0.134	-0.374	-0.206	0.222	0.039	0.048	0.129
CHRNA3	0.171	0.054	0.065	-0.091	-0.372	-0.056	0.033	-0.256	-0.023	-0.073	-0.096	-0.088
CHRNA4	0.166	0.015	-0.401	0.082	-0.123	0.092	-0.28	-0.101	0.054	0.428	0.168	-0.139
CHRNA5	-0.287	0.383	0.171	0.134	-0.041	0.286	-0.095	0.02	-0.004	-0.082	0.059	0.077
CHRNA7	-0.012	0.027	0.001	-0.026	-0.27	0.1	-0.072	-0.033	-0.06	NA	0.19	-0.063
CHRNB1	0.044	0.007	-0.021	0.049	0.08	-0.037	0.085	-0.135	0.03	0.355	0.059	-0.027
CHRNB2	0.066	-0.028	0.031	0.031	0.01	-0.04	-0.104	-0.04	-0.047	0.127	0.01	-0.12
CHRNB3	0.112	-0.024	0.304	-0.318	0.14	0.162	-0.169	0.092	0.018	0.164	0.024	-0.087
CHRNB4	0.104	0.001	0.038	-0.135	0.229	-0.037	-0.079	0.01	-0.022	NA	0.046	-0.11
CHRND	0.076	0.032	0.005	0.033	0.013	-0.051	-0.01	0.179	-0.03	-0.155	0.021	-0.223
COMT	-0.039	0.249	-0.061	0.031	-0.016	0.014	0.086	-0.128	0.105	0.261	-0.078	0.052
CRH	-0.181	0.012	0.013	-0.078	0.021	-0.182	0.019	-0.253	NA	0.085	-0.122	-0.051
CSF2	-0.738	-0.431	0.232	0.129	0.026	-0.087	-0.121	0.268	NA	0.096	0.492	0.079
CYP1A2	NA	0.024	NA	NA	NA	NA	NA	0.213	NA	-0.439	NA	-0.026
CYP2A6	0.201	0.038	-0.211	-0.077	-0.047	-0.161	-0.047	0.725	1.653	NA	-0.344	-0.068
CYP3A7	0.405	0.11	-0.039	-0.112	-0.06	0.093	0.007	0.077	0.182	NA	-0.006	0.001
CYP2A13	0.025	-0.132	-0.059	0.029	0.076	0.016	0.013	-0.104	0.035	0.021	0.01	-0.029
CYP2B6	-0.005	-0.132	-0.002	-0.026	0.074	-0.015	0.005	0.218	0.016	0.104	-0.054	-0.022
CYP2C19	-0.015	0.081	-0.032	0.021	0.125	-0.026	0.01	-0.02	-0.004	-0.292	-0.022	-0.113
CYP2C8	-0.013	-0.033	0.031	-0.002	0.078	0.002	-0.063	-0.048	-0.01	0.062	-0.035	-0.029
CYP2C9	0.06	-0.071	-0.098	0.007	-0.103	0.014	-0.018	0.014	-0.004	0.151	-0.015	-0.034
CYP2E1	-0.083	-0.148	-0.008	0.074	0.174	0.034	0.079	-0.104	0.228	0.029	0.075	-0.228
CYP2F1	0.151	-0.12	-0.014	-0.003	0.11	-0.118	0.073	-0.094	-0.156	NA	-0.015	0.057
CYP2J2	-0.279	-0.002	-0.015	0.126	-0.425	0.445	0.154	-0.435	-6.382	0.317	0.056	-0.147
CYP3A5	0.008	-0.039	0.009	0.072	0.213	0.129	-0.017	0.058	-0.013	0.423	-0.006	0.137
CYP4A11	-0.015	-0.102	0.07	0.169	-0.01	-0.03	0.071	-0.011	0.043	NA	-0.026	0.072
CYP7A1	-0.451	0.133	-0.232	0.066	-0.011	0.089	0.133	-0.14	0.993	-0.171	-0.025	-0.215
CYP27A1	0.066	-0.189	-0.045	0.007	0.016	-0.033	-0.043	-0.184	-0.065	0.278	-0.039	0.022
CYP27B1	-0.021	-0.183	-0.028	0.02	0.266	-0.064	0.027	-0.218	0.034	-0.203	0.06	-0.046
CYP51A1	0.24	-0.305	-0.116	-0.053	0.181	0.002	0.125	-0.002	0.188	0.152	-0.061	-0.09
DBH	-0.058	-0.152	0.08	-0.002	0.197	-0.038	0.111	0.103	-0.007	0.205	0.031	0.352
DCK	-0.025	0.561	-0.057	-0.41	-0.837	0.158	-0.172	-0.02	-0.021	0.243	0	0.142
DHFR	NA	0.045	NA	NA	NA	NA	NA	-0.021	NA	-0.061	NA	-0.151
DRD1	0.08	-0.019	0.002	0.117	0.113	0.036	0.202	0.543	-0.318	-0.329	-0.37	-0.029
DRD4	-0.029	-0.065	-0.023	0.039	-0.088	-0.037	-0.031	0.112	-0.011	-0.025	-0.044	0.006
EPO	-0.053	-0.077	0.063	0.098	0.185	0.007	-0.014	0.097	0.081	-0.239	0.03	0.148
FKBP1A	0.016	0.42	-0.104	0.008	-0.009	0.096	-0.069	0.243	-0.008	NA	-0.111	0.065
GAST	0.151	-0.142	0.235	0.043	0.047	-0.192	-0.031	0.334	-0.031	0.126	0.022	0.066
GABRA3	-0.246	-0.053	0.063	-0.172	-0.202	-0.013	0.139	-0.037	-1.846	NA	0.088	0.053
GABRA4	-0.524	-0.029	-0.68	0.31	-0.004	0.215	-0.088	-0.037	1	-0.005	-0.246	-0.455
GABRA5	-0.84	0.564	-0.153	0.249	-0.483	0.361	-0.516	0.065	NA	0.084	0.179	-0.123
GABRA6	-0.215	0.08	0.218	0.195	0.134	-0.082	0.072	0.009	-0.033	NA	-0.055	-0.061
GABRB1	-0.219	-0.162	0.196	-0.029	-0.063	-0.302	0.094	-0.133	-0.216	0.103	0.034	-0.277
GABRB2	-0.112	-0.13	0.596	-0.417	-0.126	0.205	-0.035	-0.174	0.101	-0.033	-0.025	0.25
GABRD	0.039	0	-0.041	0.102	-0.013	0.041	-0.03	-0.158	-0.081	0.064	-0.009	0.188
GAD1	0.062	0.007	-0.036	0.05	0.098	0.159	-0.156	0.157	0.052	NA	0.023	-0.054
GAD2	-0.102	-0.003	0.054	0.093	0.007	-0.057	0.005	-0.127	-0.392	0.143	-0.093	-0.066
GHRHR	0.006	-0.02	0.094	0.024	0.069	0.063	-0.157	-0.08	-0.008	0.263	-0.03	-0.114
GLRB	0.844	0.411	-0.095	-0.096	-0.183	1.282	0.002	-0.135	NA	-0.048	-0.254	-0.746
GRIK3	0.099	-0.061	-0.054	0.149	-0.21	-0.163	0.047	0.112	0.198	0.044	0.067	-0.187
GRIN2B	-0.194	NA	0.618	-0.22	NA	0.018	-0.197	NA	0.716	-0.009	0.326	NA
GRIN2C	0.053	-0.124	-0.082	0.138	-0.048	-0.023	-0.057	0.074	-0.075	-0.093	-0.063	0.042
GRIN2D	-0.011	0.079	-0.056	-0.138	-0.11	-0.013	-0.052	-0.067	-0.1	-0.043	0.045	0.066
GRM2	-0.091	-0.486	0.031	0.026	0.033	0.023	0.064	0.008	0.076	0.2	-0.02	-0.029
GRM3	0.288	0.052	0.115	-0.379	0.135	0.204	-0.65	-0.247	0.081	0.148	-0.038	-0.323
GRM4	0.236	-0.084	-0.29	-0.002	-0.1	0.006	-0.327	0.01	-0.579	0.091	-0.124	-0.23
GRM6	-0.601	-0.064	0.013	0.098	0.237	-0.079	0.006	0.437	NA	-0.06	0.078	0.04
GSTM2	-0.027	0.166	-0.213	0.077	0.175	0.184	-0.081	0.216	-0.325	0.266	0.164	-0.043
GSTM3	0.02	-0.159	0.272	-0.171	-0.001	0.02	0.186	-0.37	0.264	0.2	0.091	0.121
GSTM5	0.059	0	-0.091	-0.009	0.189	0.128	-0.005	0.022	-0.021	0.073	-0.002	-0.08
GSTP1	0.032	0.004	0.003	-0.041	0.263	-0.058	-0.052	0.07	0.049	0.012	0.029	-0.119
GSTT1	0.103	0.223	-0.074	0.067	0.074	0.128	-0.254	0.098	0.005	-0.081	-0.086	-0.089
GUCY1A2	0.046	0.505	0.01	0.113	0.071	0.035	-0.095	0.068	-0.008	0.043	0.029	0.004
GUCY1B3	-0.108	-0.043	0.057	0.016	-0.049	-0.111	-0.028	0.025	-0.087	0.001	-0.133	0.056
GUK1	0.016	0.041	-0.089	0.111	0.005	0.123	-0.071	-0.017	-0.001	0.097	0.002	-0.04
HPGD	0.224	-0.032	0.22	-0.091	-0.387	0.226	-0.15	0.487	0.935	0.145	-0.207	-0.613
HSD3B1	-0.549	0.17	0.032	0.374	0.273	-0.158	0.007	0.235	-0.136	-0.514	0.024	-0.146
HTR1E	0.139	0.002	-0.09	0.034	-0.037	0.048	0.028	0.019	0.043	-0.023	0.052	0.046
HTR1F	0.182	-0.221	-0.51	-0.206	-0.354	0.613	-0.072	-0.113	NA	0.006	0.157	-0.227
HTR2B	-0.438	-0.295	0.109	0.107	0.474	-1.1	0.135	0.503	NA	-0.441	0.004	-0.445
HTR2C	0.021	0.12	-0.032	-0.114	-0.115	0.063	-0.02	-0.334	-0.062	-0.224	0.039	-0.243
HTR4	0.015	0.045	-0.199	-0.059	0.022	-0.06	0.049	0.042	-6.642	-0.121	0.093	-0.056
HTR6	-0.016	-0.142	0.122	-0.136	0.094	-0.033	-0.1	0.184	0.018	-0.116	-0.01	0.056
IGF1R	0.142	0.335	-0.016	-0.039	0.08	-0.172	0.286	0.242	-0.331	-0.066	0.084	0.221
IGF2R	0.01	0.051	0.541	-0.141	-0.04	-0.789	0.207	0.009	-0.406	0.226	-0.17	0.06
IL1R1	-0.116	0.182	-0.038	-0.04	0.303	-0.1	0.06	-0.062	-0.023	-0.267	0.102	0.01
IL2RB	0.093	-0.179	0.032	-0.209	-0.858	-0.163	0.24	-0.067	6.725	0.039	-0.14	-0.006
IL5	-0.624	-0.075	0.434	-0.007	0.271	-0.156	0.144	-0.131	NA	0.065	0.074	0.725
IL7	0.255	0.593	0.132	0.228	-0.639	0.082	-0.248	0.005	0.079	-0.494	-0.348	0.54
IL12A	-0.13	0.207	0.007	0.065	0.111	0.076	0.13	-0.165	0.56	NA	-0.049	-0.007
ITGA4	0.312	-0.007	0.054	-0.362	-0.126	0.21	0.127	0.226	-6.48	-0.179	0.304	-0.017
ITGAX	-0.037	-0.062	-0.006	0.046	-0.181	0.028	-0.011	-0.758	-0.24	0.577	-0.1	0.75
ITGB6	0.222	0.047	0.097	-0.146	-0.292	-0.236	-0.08	0.043	0.198	NA	0.213	0.104
ITGB7	0.053	-0.343	0.049	0.056	-0.059	0.058	-0.005	0.077	0.008	0.033	0.036	0.035
KCNJ5	0.178	-0.061	-0.122	0.108	-0.082	-0.09	-0.026	0.003	-0.038	0.316	-0.019	0.082
KCNJ2	-0.45	-0.162	0.243	0.432	0.004	0.024	-0.545	0.25	-0.154	-0.162	0.047	0.26
KLKB1	0.359	-0.111	-0.069	-0.075	-0.548	-0.057	0.042	0.13	0.042	-0.029	-0.02	0.137
LHB	-0.056	NA	-0.015	0.027	-0.041	-0.125	-0.041	NA	-0.026	-0.059	-0.02	NA
LTA4H	-0.007	0.081	-0.056	0.015	-0.16	0.026	-0.003	-0.112	-0.019	-0.118	0.062	-0.002
MAOB	0.001	-0.15	0.026	-0.025	0.098	-0.176	-0.211	0.193	0.389	-0.085	-0.012	0.055
MGP	0.112	0.729	0.017	-0.091	0.131	0.756	-0.179	-0.549	-0.03	NA	0.016	0.004
NR3C2	0.037	0.114	0.03	-0.054	-0.883	-0.06	0.139	0.038	-0.404	0.338	0.019	-0.139
NQO2	0.006	-0.123	0.04	-0.041	-0.009	-0.021	0.001	-0.099	-0.094	NA	-0.121	-0.119
NPY	-0.058	-0.017	-0.013	-0.118	0.309	0.037	-0.132	0.025	0.365	-0.05	-0.006	-0.031
NPR1	0.059	-0.303	-0.012	-0.037	-0.072	0.018	0.08	0.01	-0.09	0.054	0.078	-0.083
NPR3	-0.003	-0.305	-0.119	-0.184	0.074	-0.109	0.127	-0.074	0.075	0.305	0.041	-0.1
NPY2R	-0.549	0.009	-0.195	0.995	0.07	-0.082	-0.433	-0.214	-1.045	0.164	-0.009	-0.041
OPRD1	0.136	0.132	0.042	-0.242	0.219	0.082	-0.059	-0.032	-0.114	-0.037	0.03	0.129
OPRK1	1.075	0.232	0.688	-0.283	-0.116	0.09	-0.258	0.038	-0.498	0.03	-0.086	-0.471
OPRL1	0.019	-0.017	-0.119	-0.039	0.045	-0.038	0.233	0.063	0.097	0.034	0.164	0.045
OXT	0.036	0.044	-0.015	-0.019	0.118	-0.082	-0.045	-0.008	-0.071	0.144	0.11	0.066
OXTR	NA	NA	NA	NA	NA	NA	NA	NA	NA	0.199	NA	NA
PC	0.084	-0.178	0.084	-0.094	0.106	-0.185	0.148	-0.114	-0.019	-0.014	-0.086	0.02
PDE3A	-0.359	0.206	-0.115	-1.13	0.371	-0.337	0.071	-0.001	0.056	-0.024	0.015	-0.087
PDE3B	-0.187	-1.019	-0.203	-0.431	0.048	-0.607	0.208	-0.229	0.198	0.038	0.033	-0.042
PDE1B	0.186	0.073	-0.142	-0.238	-0.072	0.085	-0.216	-0.122	0.17	0.099	0.065	0.09
PDHB	-0.012	0.138	-0.005	0.061	0.007	0.022	0.004	0.218	0.1	NA	-0.023	-0.014
PGR	-0.02	-0.104	0.012	-0.148	0.029	0.136	0.507	0.118	-0.777	-0.232	-0.016	0.024
ABCB1	-0.303	0.065	0.529	-0.053	0.202	0.402	-0.367	-0.386	0.654	-0.481	0.239	-0.582
PLA2G1B	-0.061	-0.015	0.064	-0.079	-0.009	-0.083	-0.014	0.102	0.002	0.046	-0.008	-0.008
PLA2G5	-0.07	-0.03	0.31	-0.15	0.048	0.421	-0.145	0.14	0.006	0.106	0.062	-0.075
PLAT	0.033	0.296	-0.019	0.082	0.286	0.169	0.116	-0.133	0.605	0.039	0.075	0.032
PLCB3	0.207	-0.041	-0.069	0.242	-0.235	-0.229	0.125	-0.212	-0.087	NA	0.021	0.066
SERPINF2	0.131	-0.254	-0.103	0.026	0.071	0.335	0.108	-0.099	0.154	0.013	-0.04	-0.053
PLOD2	0.011	-0.091	0.073	-0.063	0.169	0.176	-0.005	0.103	0.478	NA	-0.031	0.157
PNLIP	-0.245	-0.055	-0.203	0.149	-0.327	-0.17	-0.249	0.128	NA	0.147	0.027	0.19
POLR2A	0.063	0.313	0.329	-0.109	-0.016	-0.299	0.096	0.222	-0.069	-0.178	-0.131	-0.001
POLR2B	0.091	0.021	0.108	0.043	-0.032	0.124	0.011	0.165	0.024	0.125	0.08	0.045
POMC	0.095	-0.232	-0.051	-0.041	-0.007	0.01	-0.08	0.046	-0.151	0.108	0.017	0.096
PON3	0.015	0.469	0.109	-0.185	-0.323	-0.018	0.028	0.319	0.089	0.018	-0.033	0.381
POR	-0.06	-0.1	0.103	0.014	0.129	0.115	0.013	0.255	0.121	0.257	0.016	-0.035
PPIB	-0.027	-0.074	-0.058	-0.061	-0.209	-0.228	0.001	-0.577	0.124	0	-0.147	-0.176
PPIC	0.206	0.147	-0.006	-0.176	0.322	0.135	0.087	-0.008	0.186	-0.03	0.089	0.133
PPP3R1	-0.551	0.225	-0.274	-0.225	-0.669	1.434	-0.094	0.165	-0.871	NA	-0.149	-0.111
PRIM1	0.009	-0.194	-0.04	0.07	0.092	0.091	0.09	0.044	0.086	0.097	0.161	-0.04
PRL	-0.006	-0.079	-0.034	0.051	-0.194	0.08	-0.019	0.147	0.01	-0.213	0.134	0.137
PRLR	-0.228	0.215	-0.106	0.053	0.132	-0.015	-0.002	0.125	0.377	-0.026	0.11	0.016
PRRG2	0.149	0.009	0.059	-0.088	-0.071	0.114	-0.026	0.035	0.058	0.009	0.139	0.065
PTAFR	0.032	-0.081	0.013	0.055	0.027	0.06	-0.088	0.063	0.024	-0.172	0.045	0.069
PTGDR	0.201	0.186	-0.014	0.111	0.032	0.099	0.005	0.012	-0.049	-0.011	0.009	-0.032
PTGDS	0.012	-0.068	-0.036	0.005	0.025	-0.018	-0.053	-0.031	0.078	NA	0.054	0.031
PTGER1	0.103	NA	0.118	-0.143	-0.129	0.011	-0.059	NA	-0.119	0.063	0.024	NA
PTGER2	0.371	0.183	0.002	-0.415	-0.468	-0.067	0.074	-0.12	-0.719	-0.169	0.26	-0.028
PTGER4	0.03	0.785	-0.01	0.016	-0.07	-0.093	0.129	-0.016	0.29	0.109	0.019	-0.278
PTGIR	-0.025	0.173	-0.077	-0.078	0.023	-0.106	-0.056	0.352	-0.122	0.219	0.08	0.257
PTGIS	-0.554	0.188	0.072	0.354	-0.016	-0.06	-0.209	0.183	6.697	NA	-0.133	0.013
PTGS1	0.146	0.014	-0.019	-0.017	0.032	-0.003	-0.029	-0.234	0.032	-0.669	0.062	0.104
PTGS2	-0.259	0.203	-0.295	-0.47	0.392	0.301	-0.001	0.211	0.4	0.009	0.007	0.471
RARB	0.034	0.06	-0.149	0.079	-0.064	0.049	-0.092	0.099	0.06	0.316	-0.066	0.05
RARG	-0.032	-0.59	0.004	-0.02	0.03	-0.188	0.001	-0.048	0.081	-0.081	-0.132	0.164
RPL5	0.05	0.149	-0.01	0.078	-0.085	-0.207	-0.14	0.059	0.125	-0.008	0.015	NA
RPL13	-0.024	0.237	-0.123	0.107	0.126	-0.304	0.108	0.016	0.305	0.033	-0.01	NA
RPL23	0.052	-0.034	0.069	0.027	-0.006	-0.387	-0.228	0.133	0.186	0.088	0.069	NA
RPL19	0.023	0.034	0.079	-0.039	0.049	-0.358	-0.25	0.134	0.082	0.081	0.034	NA
RPL22	0.064	0.094	0.113	0.043	0.059	-0.075	-0.288	0.101	0.064	0.064	0.035	NA
RPL17	-0.065	-0.034	-0.014	0.053	-0.003	-0.006	-0.157	0.014	0.018	NA	0.085	-0.01
RPL27	0.02	-0.107	-0.029	0.044	-0.099	-0.344	-0.159	0.099	-0.053	0.209	0.168	-0.063
RPL30	-0.112	0.074	-0.117	-0.058	0.179	-0.263	0.032	0.08	0.203	-0.04	-0.002	NA
RPL27A	0.156	0.108	0.099	0.057	0.049	-0.484	-0.239	0.054	0.262	0.041	0.126	NA
RPL29	-0.02	0.014	0.006	-0.001	-0.234	-0.142	-0.058	0.073	-0.153	0.001	-0.003	-0.049
RPL35A	-0.028	0.001	0.013	0.037	0.023	0.098	-0.188	0.069	-0.05	0.238	0.122	-0.057
RPL37	0.124	0.263	0.124	0.052	0.068	-0.444	-0.256	0.029	0.253	0.037	0.108	NA
RPL36AL	-0.049	-0.131	-0.113	-0.013	-0.051	-0.071	0.045	0.178	0.266	NA	-0.143	0.005
ITSN1	-0.14	0.257	-0.034	0.357	0.015	0.111	0.05	0.122	0.052	-0.006	-0.134	-0.238
SLC2A9	-0.241	0.237	0.132	0.141	0.179	0.165	-0.111	-0.021	-0.72	-0.327	0.151	-0.069
TRYX3	NA	-0.029	NA	NA	NA	NA	NA	0.067	NA	-0.01	NA	NA
ATP2B1	-0.267	0.184	-0.149	-0.117	0.291	0.007	0.103	0.095	-0.287	NA	-0.337	0.037
PRKCSH	0.096	0.188	0.013	-0.092	-0.01	0.012	0.004	-0.198	-0.03	0.153	0.099	-0.217
REEP3	0.137	NA	0.131	-0.178	-0.057	0.066	-0.101	NA	0.09	0.125	0.394	NA
CD44	-0.033	0.244	0.123	-0.104	-0.212	0.036	0.03	-0.144	0.232	-0.016	0.143	0.317
LMO3	-0.317	0.023	0.164	-0.283	0.233	-0.046	-0.04	-0.067	NA	0.248	0.12	-0.333
ATP2B4	0.042	0.205	-0.116	-0.178	0.063	0.115	-0.019	-0.248	-0.048	-0.361	0.277	0.179
TNNT2	0.102	-0.445	-0.102	0.013	-0.247	-0.163	-0.078	0.145	-0.487	0.026	-0.086	-0.415
STX16	-0.155	0.237	-0.167	-0.449	-0.115	-0.02	0.057	0.168	0.024	0.063	0.083	0.047
C16ORF87	NA	NA	NA	NA	NA	NA	NA	NA	NA	0.065	NA	NA
SLC35E4	NA	0.481	NA	NA	NA	NA	NA	-0.093	NA	-0.05	NA	0.263
ZDHHC13	-0.167	0.301	-0.001	-0.032	0.042	-0.003	0.088	0.066	-0.124	NA	-0.07	0.046
PTER	-0.123	NA	-0.035	-0.761	-0.017	0.218	0.122	NA	0.059	0.027	-0.386	NA
SNCB	0.041	0.051	-0.02	-0.035	0.069	0.007	-0.033	-0.037	-0.033	-0.004	0.038	0.022
NDUFV3	-0.036	0.061	0.049	-0.01	-0.083	-0.075	0.044	0.184	-0.093	0.129	-0.184	-0.065
UGP2	0.089	0.236	-0.08	0.055	0.144	0.138	0.029	-0.014	0.034	NA	-0.036	0.007
TAGLN	0.117	-0.021	0.45	-0.248	-0.116	0.053	-0.04	0.18	-0.645	-0.72	0.022	-0.072
RORC	0.227	-0.336	-0.105	0.184	-0.363	-0.234	0.126	-0.139	0.257	0.06	0.329	0.101
TM6SF2	NA	NA	NA	NA	NA	NA	NA	NA	NA	0.138	NA	NA
CD36	0.14	0.248	-0.276	0.272	0.149	-0.208	0.375	0.128	-0.164	NA	0.028	-0.064
C9ORF103	0.001	NA	-0.068	-0.026	-0.093	-0.004	0.008	NA	0.004	0.279	0.069	-0.264
LEMD1	0.255	-0.15	-0.154	0.249	0.082	0.172	-0.031	-0.592	0.077	NA	-0.21	-0.183
GRB10	-0.235	-0.052	-0.478	-0.463	0.355	-0.247	0.077	-0.187	-0.759	NA	0.223	0.112
GALK2	0.038	-0.276	-0.022	0.164	0.061	0.198	0.081	0.06	0.114	0.068	0.032	0.264
GGA1	0.055	0.219	0.019	-0.119	0.113	0.177	0.152	-0.002	0.13	NA	0.021	-0.043
PDE9A	0.003	0.097	0.192	0.145	-0.234	-0.11	-0.146	-0.097	0.04	0.139	-0.045	-0.015
ZNF425	NA	NA	NA	NA	NA	NA	NA	NA	NA	0.027	NA	NA
SPOPL	NA	NA	NA	NA	NA	NA	NA	NA	NA	0.481	NA	NA
CYP27C1	NA	NA	NA	NA	NA	NA	NA	NA	NA	-0.022	NA	NA
MAP3K15	NA	NA	NA	NA	NA	NA	NA	NA	NA	0.151	NA	NA
NFKBIB	0.131	-0.135	0.025	-0.003	-0.076	0.031	-0.073	0.187	-0.098	NA	0.037	0.069
PIM3	NA	NA	NA	NA	NA	NA	NA	NA	NA	0.08	NA	NA
C17ORF91	0.08	NA	-0.038	-0.035	0.103	-0.117	-0.016	NA	0.051	0.002	0.096	NA
RUNX1	0.249	0.161	0.179	-0.031	0.205	0.38	0.042	0.256	0.085	NA	-0.013	-0.02
TTC3	0.04	0.078	0.02	-0.163	-0.052	-0.286	0.233	0.089	-0.028	0.032	-0.143	0.034
UBASH3A	-0.073	0.211	0.019	0.233	0.174	0.028	-0.043	0.025	0.256	-0.007	-0.154	-0.07
MTUS1	0.373	0.218	-0.057	0.262	-0.14	-0.359	0.097	0.519	0.438	NA	-0.103	-0.089
PPARA	0.144	0.032	-0.067	-0.15	-0.227	0.105	0.054	-0.192	0.15	1.006	-0.038	-0.153
AFAP1L2	-0.188	-0.211	0.035	-0.011	0.117	-0.227	0.094	0.376	-0.09	0.014	0.447	NA
ATP5C1	-0.013	0.188	0.04	-0.02	0.068	0.102	-0.15	0.037	0.08	NA	0.003	0.038
PLEKHA1	0.105	-0.676	0.007	0.228	-0.18	-0.445	0.016	0.142	0.332	-0.087	0.083	0.172
ATE1	-0.025	NA	-0.039	-0.1	0.093	0.159	0.007	NA	0.154	0.35	0.014	NA
ATP5E	0.008	-0.004	0.06	0.004	-0.045	0.066	-0.078	0.128	0.116	0.025	0.022	-0.249
USP16	-0.025	0.129	0.004	0.096	0.128	0.203	0.001	-0.031	0.035	0.211	0.038	0.112
GPM6B	0.117	-0.09	0.114	0.071	-0.093	-0.024	-0.031	-0.038	0.055	0.003	0.112	-0.005
EXOSC10	0.009	0.088	-0.085	0.017	-0.06	-0.301	0.08	0.14	0.131	NA	-0.013	0.041
GMPR2	-0.154	-0.14	0.071	0.211	-0.203	0.077	0.087	-0.115	0.098	0.07	0.229	0.135
NT5C1B	0.003	0.137	0.03	-0.004	0.105	-0.068	-0.046	-0.191	-0.073	NA	-0.017	0.071
HCFC1R1	-0.017	0.018	-0.002	0.032	-0.029	-0.092	-0.041	-0.192	-0.174	0.079	-0.047	0.045
CLDN18	-0.065	0.042	-0.04	-0.057	-0.027	0.093	-0.11	0.045	0.036	0.059	0.096	0.001
ATP5G1	-0.056	0.144	-0.001	0.014	-0.088	-0.001	-0.007	0.223	0.155	0.159	-0.111	-0.096
ATP5G2	0.09	0.049	0.038	0.022	-0.051	0.122	-0.188	0.184	-0.057	0.085	0.102	-0.382
ASTL	NA	NA	NA	NA	NA	NA	NA	NA	NA	0.002	NA	NA
KLK2	0.076	NA	0.032	0.07	-0.002	0.091	-0.054	NA	-0.023	0.041	0.081	NA
AFTPH	-0.108	0.134	-0.27	0.154	-0.206	0.111	-0.059	-0.008	0.28	-0.014	0.082	0.056
ARL6IP4	0.065	0.114	-0.012	0.077	0.031	-0.124	-0.036	-0.105	0.212	-0.123	0.009	-0.097
CAPRIN2	0.063	0.18	-0.288	0.379	-0.017	-0.119	-0.017	0.295	-0.119	-0.13	0.108	NA
ZFYVE27	0.072	NA	0.072	0.246	0.189	0.353	0.178	NA	0.055	0.079	0.012	NA
2017-03-08	0.047	NA	0.033	0.028	-0.067	0.001	-0.019	NA	0.007	-0.017	0.094	NA
EXOSC3	0.011	-0.256	-0.507	-0.018	0.095	0.056	-0.079	0.169	-0.018	0.298	-0.078	0.115
FCGR2B	0.094	-0.152	0.06	0.032	-0.278	0.072	0.052	0.197	-0.157	0	-0.076	0.109
FMO3	0.156	0.123	0.313	-0.448	0.261	-0.163	0.356	0.105	-0.429	0.067	0.111	0.014
GATA3	-0.241	0.65	0.059	0.062	0.058	0.006	0.175	0.173	-0.129	-0.283	-0.063	-0.019
GOLGA7	0.159	0.445	0.094	-0.02	0.27	0.112	0.186	-1.076	0.056	-0.14	-0.012	0.09
C10ORF78	0.008	0.197	-0.147	0.036	0.074	-0.122	0.122	0.3	0.063	0.112	-0.029	0.047
DNAJB12	-0.058	0.249	0.034	-0.008	-0.313	0.149	0.061	0.054	0.056	0.018	0.017	0.087
PDE4DIP	0.045	0.216	-0.198	0.183	-0.129	-0.214	0.036	0.245	-0.097	NA	0.066	0.048
RAB11FIP1	0.174	-0.869	0.146	-0.191	0.103	-0.035	0.115	-0.491	0.027	0.091	0.115	0.18
ZNF787	NA	0.206	NA	NA	NA	NA	NA	-0.183	NA	0.057	NA	0.165
INPP5J	NA	0.398	NA	NA	NA	NA	NA	-0.041	NA	0.08	NA	0.167
ZNF280D	-0.094	0.021	-0.066	-0.085	-0.099	0.004	-0.197	-0.37	0.173	NA	-0.04	0.016
BTBD7	0.038	0.259	0.012	0.178	-0.985	-0.16	-0.048	0.105	0.267	NA	-0.017	-0.075
CENPM	0.001	0.012	0.048	-0.043	-0.038	0.107	0.08	0.18	-0.314	-0.023	-0.016	-0.057
THOC5	-0.017	0.222	-0.012	-0.032	0.04	0.011	-0.093	-0.017	0.018	0.127	0.007	0.175
FCRLB	NA	NA	NA	NA	NA	NA	NA	NA	NA	0.089	NA	NA
GPATCH8	NA	0.092	NA	NA	NA	NA	NA	0.133	NA	0.039	NA	0.083
GPR139	NA	NA	NA	NA	NA	NA	NA	NA	NA	-0.315	NA	NA
H2BFWT	0.074	0.216	0.098	-0.02	-0.092	-0.071	-0.072	0.06	0.048	NA	0.032	0.007
TWISTNB	-0.081	-0.199	0.048	-0.206	-0.039	-0.716	-0.33	0.165	0.144	-0.209	0.153	0.186
TPD52L1	0.048	0.224	0.101	0.098	0.022	0.048	0.078	-0.201	0.024	-0.02	0.02	-0.027
BICD1	0.031	-0.415	0.111	0.125	0.01	-0.188	0.108	-0.401	-0.49	0.305	-0.073	-0.121
CACNA1I	0.039	-0.142	0.021	0.031	-0.028	0.026	-0.079	-0.052	-0.057	0.063	0.021	-0.18
SMAD2	-0.007	0.084	0.008	-0.519	-0.092	-0.082	-0.099	-0.144	-0.19	-0.187	0.049	-0.009
C1ORF95	0.242	-0.035	0.091	0.109	-0.058	0.028	0	-0.044	0.112	NA	0.056	-0.27
C11ORF49	0.045	NA	-0.04	-0.012	-0.019	0.22	0.091	NA	0.173	0.08	0.051	NA
LEPR	0.032	0.075	-0.011	0.146	-0.018	0.081	-0.176	0.039	0.12	NA	-0.155	-0.064
HMGXB4	-0.295	-0.018	0.05	0.185	-0.14	-0.004	0.041	-0.141	-0.075	-0.157	0.039	0.033
UCRC	0.093	0.171	0.055	-0.217	0.135	0.069	0.003	-0.055	0.095	0.175	0.121	-0.743
SMAD1	-0.051	0.082	0.024	0.34	0.274	0.178	0.195	-0.106	0.088	-0.054	0.09	0.232
ZMAT5	-0.001	0.219	0.027	-0.217	-0.018	-0.117	-0.057	-0.085	-0.059	0.101	0.005	0.033
BRPF1	-0.11	0.128	0.044	0.129	-0.126	0.007	0.004	0.093	-0.283	-0.005	-0.072	0.029
RREB1	0.271	-0.153	0.211	-0.054	0.019	-0.14	-0.119	0.307	-0.097	-0.166	-0.18	-0.051
OSBPL8	-0.895	-0.885	-0.291	0.018	0.242	0.064	0.035	-0.083	-0.538	0.091	-0.391	-0.339
RECQL5	0.019	0.063	-0.106	0.112	-0.024	-0.067	0.32	0.106	-0.203	-0.535	-0.242	-0.208
GLE1	0.017	-0.122	-0.075	0.241	-0.134	-0.044	0.19	-0.076	0.09	0.037	0.019	0.033
ATP5H	-0.053	0.124	-0.025	-0.008	-0.128	-0.158	-0.011	-0.115	-0.029	-0.093	-0.1	-0.086
RBMS3	0.318	0.043	-0.042	-0.132	0.098	0.026	-0.077	-0.406	0.039	0.264	0.048	0.038
MGLL	-0.029	0.214	0.077	0.08	-0.413	-0.001	-0.491	-0.275	-0.035	-0.299	-0.396	0.115
NHP2L1	0.063	-0.068	0.076	0.175	0.001	-0.1	0.018	0.09	-0.019	-0.009	0.092	-0.118
BICD2	-0.063	-0.436	0.004	-0.242	-0.152	-0.265	0.094	-0.209	0.041	-0.094	-0.044	-0.102
SMARCD3	0.063	-0.004	-0.048	0.214	0.041	-0.193	0.37	0.159	-0.277	0.145	-0.093	-0.147
ATP5S	-0.002	0.15	0.01	-0.211	0.109	0.112	-0.101	0.172	0.223	-0.337	-0.063	-0.19
PARVB	0.115	-0.027	0.078	-0.082	0.051	0.126	0.084	-0.055	0.08	0.167	-0.049	-0.03
SLC6A19	-0.358	NA	0.279	-0.165	-0.391	0.132	0.015	NA	0.525	0.129	-0.107	NA
SP5	-0.014	NA	-0.105	0.253	0.122	-0.07	0.015	NA	-0.023	0.553	-0.021	-0.088
MED15	-0.083	0.125	-0.067	-0.112	0.019	0.191	-0.123	0.056	-0.131	NA	-0.034	-0.054
EVI2A	0.123	0.241	-0.284	0.008	0.4	0.023	0.104	-0.126	-0.193	0.02	-0.064	-0.201
HBM	NA	NA	NA	NA	NA	NA	NA	NA	NA	0.085	NA	NA
BMF	0.103	1.207	-0.032	-0.201	0.482	-0.478	0.049	0.489	0.345	NA	0.141	-0.143
ANXA13	-0.021	-0.358	0.322	-0.351	-0.561	0	0.133	-0.34	NA	0.139	0.132	-0.533
DYRK3	0.102	-0.199	0.007	-0.009	-0.139	0.007	0.138	-0.405	-0.177	0.005	-0.043	0.186
GPRASP2	0.016	NA	0.048	0.108	0.381	-0.151	0.211	NA	-0.026	0.228	-0.113	NA
LRRC29	0.071	0.661	-0.125	0.042	0.046	0.006	0.084	-0.213	0.282	0.297	-0.007	-0.154
GRK6	0.164	0.541	-0.131	-0.123	-0.042	0.025	-0.231	-0.773	-0.151	0.114	-0.029	-0.223
CD200	0.085	0.042	-0.123	0.089	-0.044	0.068	0.048	0.128	0.133	-0.011	0.152	-0.167
OR13A1	NA	NA	NA	NA	NA	NA	NA	NA	NA	-0.022	NA	NA
ZNF783	NA	-0.307	NA	NA	NA	NA	NA	-0.007	NA	-0.099	NA	NA
ZNF740	-0.145	NA	0.029	-0.035	0.08	0.091	0.072	NA	0.023	-0.192	0.118	NA
ZNF774	NA	NA	NA	NA	NA	NA	NA	NA	NA	0.18	NA	NA
FIGLA	NA	NA	NA	NA	NA	NA	NA	NA	NA	-0.079	NA	NA
TMEM195	NA	NA	NA	NA	NA	NA	NA	NA	NA	-0.129	NA	NA
LOC402573	NA	0.029	NA	NA	NA	NA	NA	-0.099	NA	0.12	NA	NA
SLC22A20	NA	NA	NA	NA	NA	NA	NA	NA	NA	-0.129	NA	NA
FGFRL1	-0.082	0.991	0.247	0.304	0.329	0.289	0.025	0.002	-0.246	-0.894	0.003	-0.093
DPP10	-0.328	0.304	-0.112	-0.186	0.286	0.034	0.073	-0.543	-0.277	-0.333	0.002	-0.046
UMODL1	-0.746	NA	0.769	-0.072	0.29	-0.003	0.382	NA	0.519	0.194	-0.213	NA
PLA2G6	-0.096	0.161	0.003	0.24	0.106	0.465	0.197	-0.21	0.659	0.076	-0.049	0.301
ITGA11	0.121	-0.106	-0.011	-0.157	0.246	0.009	0.032	0.067	0.285	0.032	0.032	0.001
NCK2	0.043	0.024	0.027	-0.183	-0.005	-0.044	0.036	-0.005	-0.121	NA	0.02	0.006
RPS3	0.08	0.092	0.094	0.044	-0.068	-0.004	-0.255	0.093	-0.026	-0.204	0.067	NA
SP140	0.042	0.378	-0.019	0.134	-0.257	0.024	0.019	0.128	0.083	NA	0.004	-0.164
OR8S1	0.155	NA	-0.012	0.049	0.098	-0.006	0.139	NA	0.024	0.092	-0.216	NA
LRRC55	-0.085	NA	-0.2	0.231	0.125	-0.02	-0.327	NA	-0.231	0.035	0.079	NA
OR9Q1	NA	NA	NA	NA	NA	NA	NA	NA	NA	0.202	NA	NA
PKP2	-0.181	0.486	0.057	0.122	0.331	-0.062	-0.199	-0.062	0.299	NA	-0.12	0.172
SREBF1	0.069	-0.243	0.084	-0.058	-0.199	-0.087	-0.005	0.512	0.243	0.148	-0.083	-0.092
MAGED1	-0.026	0.091	0.042	-0.012	0.01	0.123	0.012	-0.114	0.052	-0.156	-0.005	0.014
HNRNPL	0.048	0.058	0.021	0.179	0.083	0.053	-0.109	-0.126	0.227	-0.043	0.023	0.052
DNM1	0.102	-0.068	-0.061	0.038	0.176	0.056	-0.073	0.212	0.111	0.109	0.072	-0.077
GPNMB	0.051	0.128	0.05	-0.288	0.117	0.214	0.216	-0.307	0.091	-0.204	0.097	-0.111
PRR13	-0.022	0.163	-0.015	0.015	0.001	0.127	-0.166	0.036	-0.003	0.155	-0.049	-0.218
DNM2	0.111	-1.183	0.067	0.065	-0.243	-0.007	0.089	0.039	0.005	0.066	-0.027	0.041
ZNF32	0.303	-0.11	0.118	0.431	0.852	0.222	-0.434	-0.186	0.496	0.073	-0.342	-0.015
MTIF2	-0.084	0.081	-0.008	0.102	-0.02	0.048	0.093	0.248	-0.03	NA	-0.055	-0.235
LRSAM1	-0.126	0.001	-0.157	-0.042	0.073	0.049	0.15	-0.153	0.265	NA	-0.02	-0.126
PLAUR	-0.044	0.102	0.199	0.03	-0.248	-0.228	-0.094	0.06	0.182	NA	0.068	0.218
SF3A1	0.205	0.016	0.246	0.096	0.163	-0.058	0.192	0.17	-0.063	0.205	-0.207	-0.012
2017-03-02	0.123	0.15	-0.005	0.181	-0.64	0.089	-0.098	-0.041	-0.053	NA	-0.015	-0.035
PLCXD3	-0.21	NA	-0.208	0.241	0.245	-0.004	-0.19	NA	0.32	-0.202	-0.252	0.468
PKP4	-0.204	0.682	-0.058	-0.198	-0.066	-0.312	0.111	0.129	-0.211	NA	0.041	-0.357
CPM	-0.285	-0.678	-0.043	-0.023	-0.448	-0.288	-0.02	-0.118	-0.413	-0.258	0.015	-0.423
EDA	0.034	0.182	-0.047	0.141	0.052	0.044	-0.058	-0.035	-0.047	-0.075	-0.06	0.025
CHEK2	-0.022	-0.151	0.027	0.111	0.085	-0.109	0.126	0.231	-0.142	0.112	-0.04	-0.021
FPR2	0.152	-0.089	-0.024	0.098	0.483	0.111	-0.041	0.315	-0.417	0.036	0.14	0.082
GBA	0.085	0.065	0.076	-0.008	-0.185	0.001	0.073	-0.102	0.07	NA	0.068	-0.006
NUMB	0.088	0.024	-0.056	-0.029	-0.03	-0.261	-0.023	-0.006	0.042	0.128	-0.064	-0.081
CACNB4	-0.308	0.423	-0.046	-0.238	1.434	0.08	0.34	-0.685	NA	-0.144	-0.303	-0.734
GJB3	0.397	0.055	-0.033	-0.145	-0.12	-0.215	-0.073	-0.072	-0.072	NA	-0.112	-0.149
HAO2	0.039	0.187	-0.049	0.047	-0.009	-0.046	0.229	0.144	-0.264	-0.101	0.029	0.067
SUMO2	-0.056	0.167	-0.012	0.085	-0.12	-0.1	0.004	0.259	0.172	NA	0.03	-0.019
ERBB2	-0.111	0.302	-0.004	0.127	0.087	-0.042	-0.048	-0.242	0.013	-0.086	-0.203	-0.05
IP6K2	0.254	0.246	0.138	0.265	-0.023	0.025	-0.023	-0.08	-0.208	NA	0.071	0.015
ATP7B	-0.029	0.508	0.018	-0.128	-0.009	-0.435	0.166	-0.305	0.182	-0.081	-0.26	-0.162
JMJD8	NA	NA	NA	NA	NA	NA	NA	NA	NA	0.227	NA	NA
C3ORF37	-0.317	0.068	0.086	0.033	-0.739	0.055	0.05	-0.079	0.011	0.153	0.066	0.026
IP6K1	0.071	0.188	-0.005	-0.155	0.157	0.055	0.146	-0.013	-0.109	-0.074	0.012	-0.005
ERBB2IP	-0.104	-0.13	0.02	-0.252	-0.386	-0.335	0.048	0.262	-0.107	0.144	0.045	-0.197
SIAH1	0.109	0.337	-0.025	0.046	0.267	0.028	0.141	0.19	0.229	0.097	0.048	0.179
WBP5	0.07	-0.226	0.036	0.091	-0.27	0.093	-0.062	0.094	0.07	0.024	0.038	-0.267
TSPAN17	0.073	NA	0.052	0.148	-0.174	0.091	-0.002	NA	-0.005	0.106	0.019	NA
MAPKAP1	0.171	NA	0.064	0.12	0.23	0.245	0.043	NA	-0.112	-0.004	0.115	NA
WDR33	0.115	0.277	0.076	0.008	-0.201	-0.022	-0.035	0.035	0.069	NA	0.029	0.039
PDPN	0.032	-0.021	-0.039	0.169	0.083	0.03	0.185	-0.419	-0.101	-0.083	0.015	0.155
CHRM2	0.177	-0.009	0.01	0.06	0.268	0.046	0.062	-0.057	-1.923	-0.131	0.014	0.055
ARHGAP17	-0.379	0.426	-0.174	-0.057	-0.379	-0.47	0.058	0.45	0.018	0.061	0.08	0.076
RAB37	-0.027	0.159	-0.035	0.01	0.023	0.112	-0.011	-0.112	-0.068	0.203	0.021	0.158
TCEAL1	-0.003	-0.021	-0.071	0	-0.198	0.044	-0.044	0.193	0.516	-0.007	0.025	-0.049
ZNF473	NA	-0.12	NA	NA	NA	NA	NA	-0.033	NA	0.199	NA	-0.008
WDR35	-0.077	-0.184	0.059	0.072	-0.151	0.157	0.172	0.326	0.345	0.442	-0.03	0.248
CR2	-0.011	0.365	-0.106	0.214	-0.954	-0.226	-0.085	0.664	NA	0.133	-0.108	0.049
SPIN2B	NA	NA	NA	NA	NA	NA	NA	NA	NA	0.035	NA	NA
TCEAL8	0.15	NA	-0.056	0.03	0.136	0.065	0.022	NA	0.19	0.15	0.017	NA
RPS6KA2	0.047	-0.005	-0.038	0.002	0.015	-0.006	-0.102	-0.037	-0.026	0.41	0.051	0.092
TCEAL3	0.106	-0.032	-0.009	0.031	0.034	-0.117	-0.054	0.183	-0.113	NA	0.003	-0.003
TCEAL4	0.042	-0.114	-0.038	0.087	-0.13	-0.007	-0.039	0.215	0.021	0.075	-0.048	-0.096
ALG3	0.143	-0.055	0.008	0.095	0.013	0.092	-0.12	-0.087	-0.005	NA	0.088	0.113
RPS6KA4	0.131	-0.103	0.131	-0.271	-0.61	-0.108	0.034	-0.307	0.054	-0.128	-0.071	0.152
C1ORF103	0.113	NA	0.13	0.061	-0.029	-0.067	0.062	NA	0.241	0.104	0.384	-0.014
SDC1	0.105	-0.232	0.093	-0.117	-0.133	-0.756	-0.035	-0.396	-0.062	-0.069	-0.027	-0.02
ATN1	0.02	0.026	-0.038	0.019	0.044	-0.042	-0.087	0.011	0.007	-0.037	0.055	-0.035
ALG8	0.02	-0.126	0.095	-0.1	0.1	0.124	0.12	-0.275	0.109	-0.015	0.131	0.163
SDCBP	-0.439	0.128	-0.145	-0.095	0.2	-0.071	-0.051	-0.127	0.251	-0.182	-0.024	0.083
RPL32	0.092	0.07	0.07	0	0.082	-0.402	-0.258	0.087	0.204	-0.097	0.081	NA
KLHL5	0.277	0.07	0.122	-0.04	-0.18	0.11	0.037	0.087	0.019	0.277	0.058	-0.093
ZNF37A	0.272	-0.248	-0.35	0.336	-0.454	-0.119	0.229	0.244	-0.269	0.04	-0.071	-0.042
L3MBTL3	-0.231	0.392	-0.047	0.056	0.085	0.046	-0.033	-0.015	-0.016	NA	-0.046	-0.11
NTRK3	0.023	-0.009	0.033	-0.097	-0.039	-0.039	-0.04	-0.102	-0.099	NA	0.11	-0.015
DEPDC5	-0.008	0.533	0.008	0.234	-0.204	0.114	0.168	-0.032	-0.001	NA	-0.104	-0.033
CACYBP	0.07	-0.03	-0.02	-0.06	0.139	0.228	0.001	-0.103	-0.74	-0.06	0.023	0.035
IGF2BP2	0.158	0.265	-0.195	-0.002	0.277	0.13	-0.125	-0.114	-0.117	0.188	0.269	0.083
SPOP	0.005	0.124	0.016	-0.321	-0.255	-0.325	-0.018	0.002	-0.237	0.009	0.048	0.119
ARHGAP25	-0.227	-0.1	0.026	0.02	0.493	0.132	0.011	0.193	-0.725	0.079	0.012	-0.005
IGSF3	0.067	0.174	-0.017	-0.061	-0.094	0.019	-0.017	-0.096	0.039	-0.314	0.023	-0.062
GP2	0.037	-0.054	-0.004	0.08	0.013	0.04	-0.04	0.027	0.098	NA	0.016	0.016
IFRD1	-0.067	-0.069	0.163	0.216	0.276	0.042	-0.101	-0.022	0.019	NA	-0.221	0.234
SCP2	0.086	0.175	-0.019	-0.046	0.161	0.155	-0.01	0.002	0.293	-0.296	-0.151	0.074
KLHDC9	0.062	-0.074	-0.042	0.019	-0.238	0.298	0.013	0.109	0.275	0.47	-0.079	NA
PLA2R1	0.069	0.14	-0.11	-0.156	0.026	0.837	-0.01	0.064	1.303	0.137	-0.007	0.004
GEMIN7	0.085	0.201	-0.064	0.181	-0.084	-0.003	0.061	0.108	0.011	-0.241	0.037	0.084
DUSP13	-0.189	0.174	0.074	-0.351	0.146	0.244	0.294	0.127	0.194	0.084	0.189	0.102
TRIM13	0.049	0.144	0.141	0.037	0.053	0.041	-0.017	0.053	0.036	0.046	-0.119	0.028
RASL10A	0.006	0.361	-0.291	0.068	0.114	-0.077	0.063	0.325	-0.242	-0.277	0.141	-0.271
RWDD1	0.005	0.098	-0.121	-0.028	0.064	0.334	-0.199	0.14	-0.04	NA	-0.069	0.19
TULP4	0.314	0.582	0.184	-0.057	-0.014	0.163	0.025	0.342	-0.06	-0.52	0.166	0.117
SFI1	-0.024	-0.029	-0.016	0.072	-0.057	-0.059	-0.052	-0.046	-0.057	0.369	0	0.036
SMARCB1	0.026	0.027	0.029	0.029	0.11	0.038	0.044	-0.237	0.023	-0.08	0.062	-0.038
LMBRD2	0.014	-0.098	-0.056	-0.06	-0.001	0.099	-0.002	0.01	0.121	NA	0.086	-0.026
AKR1CL1	0.172	NA	0.194	-0.479	-0.516	-0.138	-0.181	NA	0.101	-0.515	0.082	NA
RP11-45B20.2	NA	NA	NA	NA	NA	NA	NA	NA	NA	0.218	NA	NA
C1ORF186	NA	NA	NA	NA	NA	NA	NA	NA	NA	0.322	NA	NA
SS18	-0.306	-0.366	0.013	-0.987	-0.384	-0.23	0.202	-0.189	0.172	0.088	-0.275	-0.028
IRGQ	NA	0.022	NA	NA	NA	NA	NA	0.128	NA	-0.042	NA	NA
SMPD1	0.211	0.106	0.001	-0.078	-0.027	-0.069	0.003	0.263	0.048	-1.776	0.089	0.132
RPS4Y1	0.157	-0.094	0.13	-0.051	0.206	-0.047	0.054	0.021	-0.023	0.101	0.042	-0.083
OPTN	-0.103	-0.127	0.08	-0.094	-0.195	-0.644	0.208	-0.042	-0.128	-0.069	-0.228	0.066
C2ORF64	NA	-0.014	NA	NA	NA	NA	NA	0.234	NA	0.149	NA	NA
CPLX2	0.035	-0.028	0.053	-0.073	-0.239	0.006	0.02	0.074	0.027	-0.018	0.087	0.045
ZDHHC9	-0.162	0.211	-0.001	0.008	-0.204	0.049	-0.125	-0.138	0.151	-0.038	0.14	0.066
C1QL4	NA	NA	NA	NA	NA	NA	NA	NA	NA	0.147	NA	NA
UACA	0.047	-0.164	-0.042	0.078	0.162	0.02	0.051	-0.011	-0.028	0.265	-0.006	-0.168
C18ORF25	0.023	0.098	-0.024	-0.101	-0.232	-0.062	-0.13	0.155	0.02	0.033	0.048	-0.036
TMEM89	NA	NA	NA	NA	NA	NA	NA	NA	NA	-0.052	NA	NA
LOC136242	NA	0.288	NA	NA	NA	NA	NA	0.18	NA	-0.15	NA	NA
TAGLN3	-0.015	0.032	0.007	0.041	0.015	0.007	-0.051	-0.004	-0.011	0.098	0.068	-0.036
REG3G	0.087	NA	-0.224	0.051	-0.281	-0.283	-0.059	NA	-1.138	-0.426	0.178	NA
UMOD	-0.037	-0.066	-0.022	0.164	0.025	0.08	0.043	-0.09	0.003	-0.062	0.002	-0.107
CTDSPL	-0.077	-0.834	-0.572	-0.023	0.258	0.115	-0.438	0.113	-1.045	-0.976	-0.204	-0.056
C4ORF46	NA	-0.292	NA	NA	NA	NA	NA	0.126	NA	-0.079	NA	NA
WDHD1	0.045	0.021	-0.076	0.021	-0.006	-0.072	-0.024	0.026	0.003	0.083	-0.001	0.116
GPX8	NA	-0.885	NA	NA	NA	NA	NA	-0.163	NA	-0.043	NA	NA
STEAP3	0.014	-1.05	0.044	-0.035	0.026	-0.379	-0.011	-0.02	-0.127	-0.104	-0.138	-0.052
ENAH	0.089	-0.163	-0.307	-0.223	0.19	0.126	0.04	0.286	-0.089	0.193	-0.195	0.116
MXI1	-0.149	0.323	-0.158	0.131	-0.117	-0.02	-0.011	0.302	0.196	NA	-0.103	-0.034
NUPL1	0.132	0.183	0.125	0.471	-0.261	-0.424	0.012	0.643	-1.091	0.113	-0.523	-0.661
TCOF1	0.007	-0.002	0.048	0.048	0.053	-0.023	-0.178	0.044	-0.12	NA	-0.001	0.061
PICALM	-0.106	0.238	-0.147	-0.26	-0.084	-0.21	0.028	-0.916	0.139	-0.032	-0.121	0.204
THAP7	-0.037	-0.121	0.011	0.038	0.081	0.025	0.054	0.032	-0.023	0.222	-0.017	0.005
TFIP11	0.103	-0.076	0.201	0.161	0.131	0.389	0.003	0.274	-0.041	0.13	-0.048	0.037
LPHN1	-0.007	0.136	0.008	0.088	0.253	-0.064	0.095	0.303	0.359	-0.029	-0.025	0.046
C6ORF1	-0.026	0.187	-0.068	0.275	-0.344	0.34	0.065	-0.085	-0.161	-0.055	-0.039	0.019
CHAC2	NA	NA	NA	NA	NA	NA	NA	NA	NA	0.252	NA	NA
RBPMS	0.069	0.049	0.018	-0.082	0.163	-0.107	0.016	0.106	0.111	-0.203	-0.116	0.109
WDR89	-0.025	0.586	0.011	0.123	-0.065	-0.054	0.109	0	-0.22	0.077	-0.018	NA
ZNF121	NA	NA	NA	NA	NA	NA	NA	NA	NA	0.145	NA	NA
RAB19	NA	NA	NA	NA	NA	NA	NA	NA	NA	0.187	NA	NA
GCET2	-0.29	NA	-0.099	0.342	0.577	-0.231	0.072	NA	-0.536	-0.029	0.458	NA
FAT3	0.203	0.168	0.244	-0.244	-0.003	-0.019	-0.103	0.097	-0.015	0.014	0.025	0.169
CCT3	0.047	-0.036	0.07	0.013	0.061	-0.452	-0.234	0.044	0.17	0.177	0.099	NA
DSP	0.157	0.182	0.365	-0.403	0.095	-0.58	0.031	0.176	0.015	-0.191	-0.111	0.138
NIPA2	0.041	-0.054	-0.047	0.028	0.291	0.315	0.139	0.027	0.077	0.23	0.063	0.1
CUL4A	0.105	-0.398	0.065	0.082	0.02	-0.046	0.23	0.155	0.049	-0.011	0.031	-0.055
TCP1	0.006	-0.011	0.003	-0.002	-0.052	0.085	-0.107	0.167	-0.001	0.228	0.043	-0.008
GTSF1L	0.1	NA	0.064	-0.045	-0.479	0.048	-0.191	NA	0.275	0.416	0.034	NA
STK16	-0.169	-0.133	0.013	0.209	0.003	0.486	0.238	-0.065	-0.015	NA	0.292	-0.03
CKAP5	0.058	0.019	0.186	0.055	-0.06	-0.029	-0.105	0.14	-0.264	0.036	0.015	-0.048
RPS5	0.05	0.01	-0.032	0.047	-0.162	-0.038	-0.146	0.06	0.061	0.016	0.023	-0.021
STATH	0.026	0.019	0.031	0.215	-0.024	-0.187	-0.007	0.077	0.022	NA	0.152	-0.01
SIP1	0.005	0.043	-0.081	0.109	0.079	0.167	0.023	0.049	0.155	NA	-0.099	-0.233
GRINA	0.077	NA	0.135	0.136	0.054	0.169	-0.405	NA	0.175	-0.158	-0.178	NA
ACSL6	0.001	0.018	-0.084	0.008	0.152	-0.067	0.018	-0.06	-0.36	-0.096	0.105	0.059
CCT6A	0.009	0.165	-0.059	-0.038	-0.571	-0.127	-0.082	0.07	0.156	0.289	-0.006	0.042
PPP2CB	-0.421	0.276	0.181	0.124	0.275	0.233	-0.077	0.134	0.039	-0.149	0.079	-0.015
CLSTN1	0.166	0.105	0.061	0.074	0.013	-0.076	0.213	-0.033	-0.137	0.117	-0.009	-0.042
MLLT10	0.02	-0.103	0.041	-0.226	-0.255	0.058	-0.139	0.133	-0.055	NA	0.082	-0.125
RXRG	0.125	-0.06	0.041	0.024	-0.137	0.207	-0.131	0.03	-0.02	NA	0.023	0.355
LBX2	0.001	NA	0.037	-0.013	0.059	0.04	0.031	NA	-0.098	-0.082	-0.035	NA
BRD9	0.172	NA	-0.055	0.018	0.135	0.192	0.125	NA	0.131	0.069	-0.08	NA
ZCCHC11	-0.316	-0.215	-0.009	-0.046	0.191	-0.315	0.147	0.179	0.178	0.283	-0.009	0.019
C12ORF29	0.448	0.086	0.384	0.433	0.09	-0.274	-0.183	-0.362	0.317	NA	-0.216	0.348
KIAA2018	-0.033	0.338	0.17	-0.528	0.047	-0.305	-0.442	-0.154	0.14	NA	-0.162	0.154
C20ORF30	0.04	0.237	-0.11	-0.08	0.012	-0.229	0.114	0.036	0.183	-0.37	0.079	0.128
DNASE1L1	0.007	0.06	-0.048	0.178	-0.117	-0.199	0.232	0.032	-0.203	0.012	-0.012	0.073
PKD1	0.088	0.246	-0.034	0.086	-0.074	0.096	0.02	0.002	-0.004	-0.273	0.057	-0.228
SSBP3	0.043	0.259	-0.019	0.048	0.036	-0.173	-0.027	-0.049	0.053	0.288	0.166	0.197
C20ORF194	-0.066	0.053	-0.046	-0.029	-0.13	0.152	0.044	0.12	0.241	NA	-0.073	-0.015
SYTL3	NA	0.005	NA	NA	NA	NA	NA	0.032	NA	0.036	NA	-0.062
FAM168B	-0.172	0.183	0.023	0.043	0.085	-0.103	-0.453	-0.044	-0.012	NA	-0.064	-0.059
RPS6	0.1	-0.018	0.099	0.001	0.031	-0.369	-0.27	0.178	0.105	0.114	0.009	-0.272
ARHGAP28	-0.102	0.184	0	-0.428	0.426	-0.257	0.141	-0.276	0.027	NA	-0.182	-0.003
NRG3	0.036	NA	0.136	-0.145	0.101	0.099	-0.124	NA	NA	0.17	-0.112	1.081
RLBP1L2	0.053	NA	-0.044	-0.011	0.147	0.027	-0.033	NA	NA	0.019	0.11	NA
TTC7B	-0.117	0.505	0.059	-0.019	0.047	-0.585	0.086	-0.335	-0.148	-0.005	0.043	-0.582
LELP1	0.152	0.034	-0.011	-0.044	-0.462	0.033	-0.117	0.086	0.108	0.09	0.015	-0.221
C10ORF128	0.056	-0.63	0.086	-0.047	-0.044	0.023	0.264	0.08	0.15	NA	-0.07	0.047
TDRD6	0.01	-0.092	0.033	-0.031	0.331	0.099	0.097	-0.265	-0.295	NA	-0.01	-0.145
SLC25A30	0.163	-1.242	0.24	-0.09	0.357	-0.429	-0.127	-0.892	-1.046	-0.048	-0.007	-0.098
SERP2	NA	-0.008	NA	NA	NA	NA	NA	-0.095	NA	0.11	NA	NA
SLC6A17	0.08	0.206	0.079	0.136	0.029	0.047	-0.017	-0.018	0.025	-0.057	0.049	-0.017
C6ORF140	NA	NA	NA	NA	NA	NA	NA	NA	NA	0.018	NA	NA
C6ORF58	NA	NA	NA	NA	NA	NA	NA	NA	NA	0.004	NA	NA
C1QL3	0.309	NA	0.049	-0.012	-0.138	0.228	-0.112	NA	-0.291	-0.02	-0.176	NA
PTPLAD2	3.047	NA	-0.578	-0.817	-0.364	0.493	-0.044	NA	NA	-0.362	-0.394	-0.039
FAM26F	NA	NA	NA	NA	NA	NA	NA	NA	NA	-0.046	NA	NA
FAM171A1	0.107	-0.01	-0.254	-0.112	0.841	0.221	-0.125	-0.2	0.317	-0.057	-0.119	-0.305
TIAM2	0.091	0.016	-0.033	0.111	0.12	-0.036	-0.03	0.232	-0.494	NA	-0.028	-0.257
ZYX	0.057	0.043	-0.052	-0.001	0.086	-0.073	-0.104	-0.035	-0.059	-0.169	0.068	-0.051
GLT8D1	-0.229	-0.378	0.054	0.166	-0.085	0.036	0.156	0.226	0.231	0.137	-0.047	0.097
C1ORF124	-0.075	-0.258	-0.253	-0.041	0.014	0.037	-0.002	-0.058	0.099	0.091	-0.042	0.2
MYBPHL	NA	-0.037	NA	NA	NA	NA	NA	-0.039	NA	0.123	NA	NA
IFIT1L	NA	NA	NA	NA	NA	NA	NA	NA	NA	0.12	NA	NA
RPS7	0.127	0.179	0.055	0.034	0.156	-0.354	-0.24	-0.014	0.152	0.055	0.148	-0.04
PDLIM5	0.099	-0.19	-0.047	-0.069	-0.004	-0.061	0.052	0.043	0.138	-0.161	0.091	-0.028
FYTTD1	0.025	0.12	0.018	-0.027	0.367	-0.256	-0.212	-0.034	-0.439	0.06	-0.002	-0.024
MAGEA11	-0.085	0.124	0.088	-0.166	0.026	0.111	0.111	0.031	-0.038	0.002	0.176	-0.134
MAGEA4	0.124	0.034	0.007	0.103	-0.103	0.01	-0.119	-0.066	-0.013	0.086	-0.042	0.1
C1GALT1C1	0.107	0.107	-0.007	-0.042	-0.425	-0.284	0.018	0.003	0.419	-0.03	-0.042	0.038
SLC9A4	-0.147	NA	0.035	0.177	0.267	-0.016	-0.05	NA	-0.157	0.089	-0.038	NA
AR	-0.07	-0.071	-0.019	0.423	0.471	0.174	-0.19	-0.086	-6.627	-0.153	-0.085	0.087
CDK5RAP2	0.062	0.178	0.107	-0.058	0.035	-0.22	-0.085	0.113	-0.014	NA	-0.153	-0.02
TMEM44	-0.049	-0.5	0.039	0.007	-0.189	0.018	0.184	-0.176	0.123	0.111	0.089	0.016
ZMAT1	-0.176	0.203	0.672	-0.164	0.538	-0.051	-0.014	-0.186	0.826	0.429	-0.159	0.266
TRAPPC2	0.034	0.274	-0.036	-0.059	0.082	-0.091	0.099	0.308	0.126	0.277	0.147	-0.072
PCGF6	-0.024	-0.17	-0.098	-0.137	0.441	-0.332	-0.194	0.104	0.197	-0.063	-0.509	-0.044
CREB5	-0.027	-0.271	-0.112	0.203	-0.123	-0.051	-0.053	-0.623	-0.35	0.24	0.045	0.242
CHCHD7	-0.081	NA	-0.333	0.017	0.415	0.068	0.06	NA	0.055	-0.22	-0.16	NA
HICE1	NA	0.123	NA	NA	NA	NA	NA	0.007	NA	0.046	NA	NA
LECT1	0.602	0.043	-0.464	-0.098	0.061	0.083	0.099	-0.04	NA	-0.081	0.053	-0.132
OLA1	0.098	0.015	0.08	0.054	0.046	-0.059	-0.06	-0.03	0.026	NA	0.137	-0.077
PNLIPRP3	0	NA	0.066	-0.241	-0.072	-0.369	0.256	NA	-0.44	-0.257	-0.06	NA
NAT12	-0.036	NA	-0.111	-0.041	-0.249	-0.112	-0.025	NA	0.071	0.268	0.3	0.037
BTBD1	-0.3	0.257	-0.005	-0.006	0.032	0.137	0.023	-0.051	0.16	NA	0.008	0.035
RPS8	0.056	0.083	0.039	0.068	0.089	-0.222	-0.254	0.091	0.15	0.11	0.054	NA
RNASE13	NA	NA	NA	NA	NA	NA	NA	NA	NA	0.07	NA	NA
BIRC5	-0.103	-0.132	-0.007	0.131	-0.058	-0.287	0.08	0.032	-0.147	-0.064	-0.022	0.007
ARSI	0.036	NA	-0.023	0.029	0.043	-0.142	-0.037	NA	-0.039	-0.055	0.093	0.034
ZNF302	0.053	0.209	-0.414	-0.001	0.106	0.046	0.125	0.103	-0.235	0.057	0.066	-0.079
CTNNBIP1	-0.051	0.326	0.009	0.216	0.208	0.033	0.308	0.03	0.171	-0.036	-0.248	-0.597
NTRK1	0.14	-0.149	-0.056	0.187	-0.001	-0.081	-0.145	0.204	0.059	NA	-0.403	-0.201
WDR31	0.177	0.075	0.151	-0.231	0.318	0.103	0.435	0.097	0.177	-0.047	0.325	-0.109
OPCML	0.189	0.17	-0.037	0.32	-0.172	-0.064	-0.277	0.096	-0.2	0.055	-0.087	-0.107
SGOL1	0.134	0.126	0.017	0.054	-0.058	0.016	-0.102	-0.048	-0.019	-0.004	-0.12	0.165
FOXP4	0.199	0.015	0.103	0.033	0.155	-0.59	-0.046	0.271	0.011	NA	0.134	-0.031
SEC61G	-0.063	-0.017	-0.029	-0.103	-0.042	0.105	-0.088	0.004	-0.264	NA	0.112	0.012
U2AF2	0.099	0.013	-0.002	0.053	-0.071	-0.075	0.002	-0.043	-0.041	0.027	-0.008	-0.06
SLC45A2	-0.141	-0.135	-0.002	0.214	-0.036	-0.058	-0.23	0.232	0.312	-0.077	0.055	-0.031
GRP	-0.26	0.195	0.13	-0.085	0.168	-0.122	0.01	-0.593	-1.044	-0.043	0.127	0.475
CTBP1	-0.032	0.139	-0.02	0.125	-0.137	0.145	-0.039	0.164	0.197	0.034	0.037	0.042
DUSP15	0.026	NA	0.016	0.074	0.043	0.093	-0.072	NA	-0.203	-0.092	0.027	NA
RGR	0.069	-0.063	-0.153	0.173	0.13	0.024	0.086	-0.112	-0.03	0.053	-0.156	-0.086
AGPAT2	0.139	0.127	-0.089	-0.012	-0.214	-0.132	0.057	-0.063	0.023	NA	-0.169	-0.059
DCTD	-0.047	-1.216	0.009	-0.039	0.106	0.226	-0.001	0.101	0.033	0.284	0.037	-0.059
ABI1	0.115	0.266	0.003	0.046	-0.043	0.13	-0.178	0.023	0.092	0.008	0.008	-0.013
ZNF763	NA	NA	NA	NA	NA	NA	NA	NA	NA	0.18	NA	NA
RGMB	-0.268	-0.046	0.049	0.171	0.48	0.168	0.128	0.056	0.147	-0.06	0.043	NA
GNRHR	-0.035	0.074	0.024	0.224	-0.053	-0.009	-0.003	-0.2	-0.138	0.209	-0.043	0.033
DISC1	0.015	-0.387	0.23	0.125	-0.009	0.242	0.102	-0.113	0.004	-0.379	0.075	-0.155
KLK6	0.005	0.055	-0.06	-0.073	0.189	-0.085	-0.008	0.041	0.18	0.385	0.067	-0.046
C6ORF154	0.008	0.18	0.004	-0.012	-0.174	0.081	0.109	-0.03	0.027	NA	-0.036	-0.225
TCEAL5	-0.058	NA	0.329	-0.159	0.197	-0.15	0.185	NA	-0.078	0.106	-0.073	NA
C1ORF31	0.038	0.247	-0.129	-0.183	-0.017	-0.192	0.042	0.252	-0.221	0.198	-0.002	-0.057
C16ORF88	-0.017	NA	-0.043	0.028	-0.029	-0.005	0.005	NA	-0.026	0.264	0	NA
RPS9	-0.029	-0.06	-0.024	0.022	-0.031	-0.117	-0.047	0.007	-0.102	0.06	-0.042	-0.051
LSP1	-0.073	0.12	0.17	-0.009	-0.082	0.447	-0.096	-0.023	-0.174	NA	-0.028	-0.103
IGFBP3	0.162	0.02	-0.044	-0.201	-0.241	-0.109	-0.045	0.001	-0.021	0.188	0.102	0.044
FBXW7	0.058	0.318	0.125	-0.225	0.256	0.108	-0.076	-0.149	0.169	-0.075	0.149	0.044
PAGE5	0.046	NA	-0.049	0.156	0.201	-0.028	0.116	NA	-0.121	-0.6	-0.145	NA
FXR1	-0.054	-0.371	-0.054	0.039	-0.105	-0.274	-0.08	0.066	-0.009	NA	0.063	0.041
EPGN	NA	NA	NA	NA	NA	NA	NA	NA	NA	-0.32	NA	NA
AADACL4	NA	NA	NA	NA	NA	NA	NA	NA	NA	-0.494	NA	NA
LSDP5	NA	NA	NA	NA	NA	NA	NA	NA	NA	0.066	NA	NA
MAD1L1	-0.023	0.079	-0.034	-0.015	0.013	0.11	0.017	-0.07	-0.032	0.162	-0.064	0.144
EXOC7	-0.067	0.176	-0.065	-0.001	0.116	0.139	-0.035	-0.097	0.019	-0.053	0.005	-0.034
STAP2	0.049	0.048	-0.129	0.064	0.094	0.003	0.042	-0.065	-0.026	NA	0.163	0.025
C8ORF58	0.004	NA	0.083	0.346	0.121	-0.052	-0.264	NA	-0.018	-0.656	-0.046	NA
SLTM	0.088	0.004	-0.03	-0.011	0.046	0.14	0.067	0.016	0.191	0.049	-0.062	0.066
DCUN1D2	-0.018	NA	0.163	-0.014	-0.024	0.14	0.118	NA	-0.017	0.162	0.095	0.167
SPRR2G	0.022	NA	-0.044	0.018	-0.007	0.054	-0.006	NA	0.012	0.071	-0.017	0.036
AKT1	-0.087	0.09	-0.048	0.002	0.102	0.002	0.133	0.021	0.081	NA	-0.118	-0.029
CA7	0.098	-0.08	0.096	0.038	0.01	-0.058	0.055	-0.027	-0.054	0.192	0.021	0.13
USP21	0.007	0.116	0.006	0.045	0.002	-0.003	0.005	0.048	0.045	0.025	0.038	-0.045
CRYM	-0.001	0.015	0.044	0.15	-0.05	-0.059	-0.059	-0.022	0.038	0.018	-0.045	0.237
NLE1	-0.043	-0.234	-0.036	-0.067	-0.156	0.353	0.275	0.106	0.146	-0.01	-0.086	-0.086
SPRR2F	NA	NA	NA	NA	NA	NA	NA	NA	NA	0.012	NA	NA
DDX19B	0.013	0.112	-0.001	-0.025	-0.075	-0.078	-0.049	0.059	-0.144	-0.026	0.009	-0.059
TMEM93	0.135	0.127	0.142	-0.007	-0.022	0.077	-0.278	-0.001	0.122	0.239	-0.037	0.025
ILK	0.168	0.274	-0.107	0.052	-0.217	0.044	0.095	-0.081	-0.076	0.099	0.025	-0.04
DDR2	0.103	0.308	0.046	-0.059	0.129	0.031	0.025	-0.181	-0.027	0.092	0	-0.251
KCNMA1	-0.061	-0.047	-0.077	0.195	0.156	-0.004	-0.033	0.065	3.467	-0.522	0.082	-0.018
CRMP1	0.062	0.029	-0.055	0.028	0.041	-0.014	-0.109	0.028	-0.053	0.062	0.058	-0.012
ME3	-0.007	-0.064	-0.041	0.196	-0.333	-0.219	0.168	0.127	-0.11	-0.016	0.051	-0.094
FAM96A	-0.016	0.103	0.01	0.026	-0.034	-0.335	-0.105	0.116	0.339	0.068	0.243	0.043
PAK4	0.033	0.009	-0.02	0.121	0.01	-0.072	-0.051	-0.024	-0.142	-0.148	-0.024	-0.047
NCDN	0.145	0.258	0.187	0.075	-0.322	0.115	-0.145	0.101	-0.988	-0.151	0.071	-0.103
TM9SF1	-0.015	0.001	0.01	-0.072	-0.024	0.018	-0.072	-0.053	0.184	NA	-0.127	0.132
ZNF638	0.168	0.096	-0.059	-0.05	0.092	-0.104	0.032	0.05	0.097	NA	0.041	0.037
CFH	-0.043	0.533	0.004	-0.046	0.093	0.037	-0.122	0.096	-0.094	-0.11	0.078	0.036
LOC90835	0.005	-0.035	-0.023	0.02	-0.09	0.05	0.053	-0.086	-0.066	NA	-0.025	0.081
LAT	0.104	0.015	0.008	-0.101	0.246	-0.022	0.05	-0.097	0.22	NA	0.048	0.062
BAG5	0.037	-0.17	0.042	0.038	0.012	0.254	0.052	0.045	-0.113	0.066	-0.084	0.092
HDAC5	-0.013	0.053	0.053	-0.406	0.133	-0.078	0.05	0.33	-0.051	-0.113	-0.091	-0.016
RTKN	-0.111	0.162	0.032	0.085	-0.392	0.048	0.073	-0.114	-0.019	0.078	0.004	-0.124
PURG	0.017	-0.02	-0.025	-0.004	-0.029	0.033	-0.02	-0.144	0.017	NA	0.045	-0.069
PAPSS2	-0.137	-1.258	0.103	-0.183	-0.195	-0.153	-0.084	-0.012	-0.239	0.159	0.092	0.15
TSC22D3	0.12	-0.347	-0.237	-0.151	-0.087	-0.206	0.087	0.701	0.069	0.026	0.1	0.133
RPS12	0.056	0.104	0.042	-0.011	0.001	-0.293	-0.239	0.114	0.138	-0.491	0.063	NA
RPS13	-0.062	-0.009	-0.06	0.013	-0.001	-0.071	-0.106	0.121	0.021	NA	0.044	-0.101
C4BPB	0.093	-0.018	0.073	-0.061	0.067	0.148	-0.143	0.005	0.123	NA	-0.651	0.103
RFFL	-0.004	-0.001	0.016	-0.204	0.193	0.341	-0.281	0.042	0.112	0.451	0.106	0.002
SC4MOL	0.47	0.145	-0.251	0.341	0.64	0.885	-0.016	-0.055	0.347	0.425	-0.288	-0.471
SFRS14	NA	0.197	NA	NA	NA	NA	NA	0.123	NA	0.01	NA	-0.348
LAMB3	0.218	-0.244	-0.074	0.166	-0.188	-0.194	0.166	0.337	0.078	-0.342	-0.093	-0.018
USP1	0.043	-0.163	-0.041	0.082	0.008	0.133	-0.007	0.059	0.206	-0.147	-0.008	-0.115
DNTT	-0.072	-0.222	0.195	0.197	6.114	-0.222	-0.874	0.501	NA	0.128	-0.788	0.023
BTBD11	0.054	-0.112	0.154	-0.145	0.057	-0.155	-0.029	0.122	-0.017	0.188	-0.004	-0.012
SIRT3	0.183	0.088	0.112	0.089	0.247	0.096	0.141	-0.231	0.155	NA	0.032	-0.2
PRR5	0.128	NA	0.013	0.005	-0.078	-0.182	0.002	NA	0.029	0.001	-0.001	0.009
VDR	0.192	-0.594	-0.101	0.333	0.218	0.28	0.251	0.051	-0.031	-0.281	0.033	-0.126
CYB561	-0.153	-0.759	0.055	-0.098	0.061	-0.358	0.336	-0.021	-0.175	0.417	-0.054	0.023
RCCD1	NA	NA	NA	NA	NA	NA	NA	NA	NA	-0.071	NA	0.015
ERMAP	-0.213	-0.004	-0.111	0.267	0.1	-0.124	0.183	-0.25	0.254	0.098	0.045	-0.114
C14ORF28	-0.106	-0.172	-0.151	-0.011	0.382	0.266	0.066	-0.047	0.67	NA	0.038	0.025
OS9	0.095	0.077	0.082	-0.001	-0.151	-0.048	-0.003	-0.102	-0.311	NA	-0.037	-0.013
KIAA2026	-0.091	0.474	0.434	0.19	-0.103	-0.099	0.231	0.16	-0.009	0.038	0.023	-0.005
IQWD1	0.209	0.369	-0.121	0.153	0.136	0.018	0.075	0.258	0.251	0.124	-0.003	-0.041
CXORF61	NA	-0.399	NA	NA	NA	NA	NA	0.535	NA	-0.063	NA	NA
RAB28	-0.257	0.365	-0.007	-0.128	0.145	0.026	0.172	-0.105	0.13	0.224	0.101	0.167
VMA21	NA	0.08	NA	NA	NA	NA	NA	-0.077	NA	0.073	NA	NA
C5ORF45	0.113	0.07	-0.088	-0.037	0.032	0.196	0.07	0.052	0.146	0.063	0.227	-0.003
SH3PXD2B	0.006	0.165	0.16	0.107	0.52	0.109	-0.174	-1.056	0.07	-0.356	-0.039	-0.259
GNG10	-0.022	-1.558	-0.103	-0.037	0.014	0.222	-0.087	0.065	0.257	-0.094	-0.119	-0.144
RPS15	-0.008	-0.032	-0.046	-0.005	-0.222	-0.112	-0.023	0.131	-0.216	NA	-0.021	0.007
TPM1	0.222	-0.059	0.024	-0.448	-0.228	0.126	0.108	0.153	0.009	NA	-0.059	0.057
SH3BP5	-1.099	0.162	-0.024	-0.134	-0.265	0.157	0.049	0.166	0.274	-0.038	0.09	-0.114
ZBTB16	0.01	-0.028	0.005	-0.062	-0.142	0.04	-0.136	-0.001	0.167	0.171	0.02	-0.05
MTCP1	0.064	0.012	-0.112	0.028	0.015	-0.027	0.05	0.145	0.069	0.052	0.012	0.09
VPS13A	0.135	-0.069	0.049	-0.154	-0.005	-0.16	0.071	0.105	0.11	0.223	0.067	0.028
PAEP	-0.112	0.021	0.014	-0.011	0.11	0.027	-0.043	0	0.069	-0.051	0.028	-0.016
POLR3H	0.113	-0.008	0.15	0.032	-0.082	-0.084	-0.018	0.015	-0.271	-0.006	-0.206	0.013
VLDLR	0.105	0.288	0.042	0.044	0.053	0.084	0.005	-0.026	0.373	0.396	0.015	-0.148
DKK3	-0.026	0.194	0.202	0.032	-0.025	0.116	0.053	0.301	-0.005	-0.098	0.066	-0.112
TFEC	-0.036	0.161	-0.088	-0.159	0.094	-0.047	0.196	0.12	-0.068	0.099	-0.026	-0.093
NTRK2	0.046	0.046	0.577	-0.141	-0.432	0.129	0.019	-0.208	-0.106	-0.053	-0.162	-0.118
CORO1B	-0.075	0.036	-0.012	-0.125	0.19	-0.071	0.035	-0.411	0.15	-0.006	-0.056	0.115
NR3C1	0.055	0.015	-0.069	0.15	0.096	-0.186	0.065	0.631	0.11	-0.4	-0.224	0.08
FPGS	0.061	-0.429	-0.043	-0.024	-0.029	-0.187	0.068	-0.041	-0.07	-0.577	-0.149	-0.013
FSHB	0.146	0.204	0.053	-0.075	-0.214	-0.221	0.029	0.039	0.029	0.122	-0.04	0.215
GCOM1	-0.245	0.046	0.076	-0.168	0.47	0.277	0.133	-0.351	-0.306	-0.129	0.129	-0.293
FAHD1	0.097	-0.013	-0.042	-0.212	-0.023	0.123	0.17	-0.034	-0.029	NA	-0.07	-0.115
SERF2	0.023	0.071	-0.091	0.056	-0.257	-0.111	-0.125	0.009	0.013	0.104	-0.089	-0.097
PIR	-0.057	0.073	0.002	-0.118	0.143	0.017	0.064	-0.547	-0.006	0.052	-0.003	-0.123
FANCB	-0.124	NA	-0.073	0.008	-0.032	0.225	-0.063	NA	0.003	-0.129	0.124	NA
MURC	NA	NA	NA	NA	NA	NA	NA	NA	NA	0.058	NA	NA
NME2	0.07	0.071	0.12	0.183	-0.014	-0.04	-0.057	0.154	-0.009	0.037	-0.196	-0.172
NAE1	0.045	-0.215	-0.003	0.104	0.175	0.033	-0.023	0.031	0.048	-0.025	-0.068	-0.008
PON2	0.159	0.222	0.069	-0.145	-0.073	0.221	-0.311	-0.224	0.538	-0.868	-0.029	0.038
FNTA	-0.055	0.157	0.058	-0.092	0.173	-0.465	0.082	0.009	0.079	0.038	0.007	-0.397
HAX1	0.045	-0.003	0.015	0.069	-0.011	0.077	-0.009	-0.085	0	0.1	0.042	-0.057
RPS16	-0.066	-0.004	0.127	0.066	-0.051	-0.185	-0.265	0.139	0.036	0.056	0.003	NA
PUM1	-0.114	-0.068	-0.057	-0.186	0.193	-0.152	0.068	0.175	0.178	-0.072	-0.369	0.078
MYADM	-0.136	NA	0.339	0.259	-0.057	-0.448	0.04	NA	-0.199	-0.27	-0.14	NA
RPS19	0.008	0.072	0.11	0.038	0.035	-0.374	-0.257	0.078	-0.066	0.06	0.098	NA
IQCB1	0.129	0.016	0.112	0.155	0.172	-0.172	-0.02	0.464	0.105	NA	-0.028	0.42
RPS21	-0.092	-0.026	-0.036	-0.01	0.025	0.036	-0.167	0.032	0.026	0.063	0.063	-0.085
SPRR2E	NA	NA	NA	NA	NA	NA	NA	NA	NA	-0.032	NA	NA
S100A13	-0.007	0.089	-0.082	0.01	-0.005	0.011	-0.016	0.053	0.077	0.05	-0.017	-0.004
FBLIM1	0.072	-0.864	-0.057	0.04	-0.044	0.036	0.078	-0.158	0.146	0.266	0.025	-0.016
GPHN	-0.011	-0.004	0.114	0.005	0.561	0.009	0.052	0.164	0.06	0.032	-0.163	0.044
ARF1	-0.197	0.139	0.008	0.041	0.092	-0.153	-0.098	0.062	0.177	-0.117	-0.006	NA
BAALC	0.484	0.038	0.446	-0.544	0.502	0.042	-0.079	0.401	0.798	0.134	-0.319	0.196
TM2D2	0.055	0.216	-0.017	0.019	0.03	-0.002	-0.38	-0.096	0.168	-0.289	-0.172	-0.047
HMBS	-0.013	-0.08	-0.579	-0.088	0.207	0.123	0.097	-0.138	-0.044	-0.169	0.018	-0.063
SBK1	NA	0.306	NA	NA	NA	NA	NA	0.128	NA	-0.026	NA	-0.163
FEZF1	NA	NA	NA	NA	NA	NA	NA	NA	NA	0.075	NA	NA
XCR1	-0.09	0.036	0.059	-0.009	0.047	0.037	-0.084	0.02	0.005	-0.027	0.017	0.027
CANX	0.039	-0.134	0.084	-0.223	-0.021	-0.114	-0.057	-0.09	-0.05	-0.006	-0.068	0.035
SH3KBP1	0.089	-0.147	-0.023	-0.232	0.036	0.01	-0.041	-0.283	0.033	-0.038	0.051	0.183
LETMD1	-0.216	0.156	-0.006	-0.204	-0.077	0.044	0.186	0.503	0.039	-0.167	0.282	0.191
ZNF688	0.059	-0.097	-0.042	-0.001	0.01	-0.044	0.107	0.035	0.08	0.048	0.052	0.045
MECR	-0.22	0.153	-0.12	-0.022	-0.05	0.073	0.016	-0.196	-0.071	0.123	-0.083	-0.073
CD276	0.066	NA	-0.028	-0.062	-0.24	-0.029	0.006	NA	0.003	-0.196	0.062	NA
BCL7A	-0.147	-0.069	0.123	0.049	-0.302	0.045	-0.412	-0.466	-0.263	0.067	-0.041	0.176
CD82	0.191	0.035	0.024	0.044	-0.207	-0.212	-0.049	0.248	-0.136	-0.091	-0.148	0.068
SLC6A9	0.063	-0.076	-0.022	0.055	-0.102	-0.01	-0.124	-0.021	-0.107	0.022	0.028	0.155
ZNF197	0.064	0.08	-0.165	0.115	-0.127	0.27	0.076	0.084	-0.013	NA	-0.066	-0.041
SPTB	0.053	0.23	-0.041	0.077	0.125	0.014	-0.046	-0.005	0.048	0.362	-0.077	-0.093
CEACAM1	0.063	-0.131	0	-0.113	0.313	0.158	0.01	0.163	0.074	NA	0.108	0.117
WASF1	0.009	-0.205	-0.147	0.193	0.015	0.034	0.038	0.108	-0.455	-0.553	0.055	-0.112
TRIM17	0.115	-0.047	-0.166	0.323	-0.412	-0.03	-0.079	0.095	1.639	0.26	-0.242	-0.062
YIPF5	-0.398	0.107	-0.006	-0.459	0.081	-0.126	0.076	0.376	-0.108	-0.217	0.032	0.066
FNBP1L	-0.15	-0.182	-0.101	-0.053	-0.196	0.099	-0.014	-0.262	-0.15	-0.088	-0.224	-0.756
SC5DL	-0.001	0	-0.058	-0.077	0.203	0.181	-0.045	-0.029	0.073	0.28	-0.336	0.064
ARPC4	0.095	-0.234	0.052	0.023	0.054	-0.104	0.042	0.086	0.157	NA	0.053	0.07
ARPP-21	NA	0.21	NA	NA	NA	NA	NA	0.119	NA	-0.034	NA	-0.068
RPS14	0.171	0.027	-0.171	0.095	0.027	-0.456	-0.218	0.114	0.306	0	0.169	-0.159
C3ORF17	-0.003	0.164	0.029	0.132	-0.013	0.083	0.046	-0.043	-0.091	0.121	-0.067	0.052
CUGBP2	0.008	-0.104	-0.14	0.074	0.043	-0.127	0.222	-0.047	0.016	0.486	-0.02	-0.103
BRUNOL4	0.122	0.03	-0.034	0.047	0.034	-0.01	-0.006	0.032	-0.029	0.1	-0.037	-0.117
PSMA8	0.101	NA	0.133	-0.083	0.133	0.177	-0.381	NA	1.007	0.138	0.003	NA
CSNK1A1	0.029	-0.011	0.082	0.128	-0.052	-0.082	0.006	0.21	0.294	NA	-0.085	0.087
ADAR	0.055	0.12	0.101	-0.215	-0.042	-0.304	0.096	-1.353	-0.252	-0.079	-0.254	0.031
AFF3	0.155	0.06	0.056	0.139	-0.031	-0.073	-0.075	0.21	0.044	0.229	0.032	0.085
CD74	0.081	0.306	-0.073	0.025	0.221	0.029	0.007	0.226	0.175	-0.047	-0.04	0.148
CYP2D6	0.154	-0.099	-0.134	-0.008	0.186	0.06	0.01	0.086	0.103	NA	-0.046	-0.011
CES1	0.028	-0.42	0.007	0.091	-0.12	0.107	-0.107	0.076	-0.004	0.137	-0.003	-0.136
CHI3L2	-0.07	0.123	0.008	-0.077	0.092	0.052	0.028	0.156	0.059	-0.195	0.037	-0.078
U2AF1	-0.142	-0.056	-0.086	-0.19	0.027	-0.02	-0.087	0.092	-0.149	0.117	0.174	NA
AP2M1	0.108	0.021	0.074	0.064	0.096	-0.338	-0.25	-0.043	0.257	0.049	0.123	0.042
TSPAN4	-0.04	0.102	-0.036	-0.096	0.129	-0.082	0.054	-0.802	0.129	-0.1	-0.062	-0.065
IRAK1	0.095	-0.147	0.166	0.064	-0.074	-0.249	0.16	0.099	-0.06	0.016	0.007	0.039
TAF5L	-0.15	-0.437	-0.002	-0.467	-1.949	0.711	0.352	0.655	-0.562	NA	0.585	-0.031
DUT	0.008	-0.085	0.133	0.23	-0.031	0.086	-0.023	0.059	-0.031	0.132	-0.11	0.017
TPD52	-0.068	0.195	0.24	0.18	0.02	0.027	0.114	0.201	-0.058	-2.259	-0.411	0.052
IFITM5	NA	NA	NA	NA	NA	NA	NA	NA	NA	-0.076	NA	NA
RAB12	0.02	NA	0.378	-0.228	-0.767	-0.057	-0.02	NA	-0.169	0.164	-0.234	NA
NQO1	-0.055	-0.323	0.167	0.01	0.106	-0.164	-0.373	-0.197	-0.054	0.006	-0.114	0.09
SPAG16	0.091	0.259	-0.005	0.027	-0.038	0.127	0.043	-0.194	0.092	NA	-0.061	-0.062
NDEL1	-0.191	-0.136	0.087	0.116	0.032	0.058	0.005	0.053	0.107	0.056	0.042	0.199
AMMECR1	0.068	-0.295	-0.112	-0.148	-0.115	-0.215	-0.118	0.186	0.072	NA	-0.123	0.342
ARFIP1	-0.66	-1.441	-0.287	-0.315	-0.612	-0.258	0.01	-0.985	-0.156	0.13	-0.169	-0.038
CUGBP1	0.054	0.072	0.002	0.021	0.02	-0.025	-0.026	-0.015	0.025	-0.018	-0.052	0.312
RFX5	0.075	0.171	-0.077	0.107	0.16	-0.245	0.22	-0.045	0.044	0.177	-0.04	-0.03
ARRDC2	-0.053	-0.385	0.037	-0.077	-0.035	0.145	-0.026	0.128	0.134	-0.232	0.022	-0.035
ARHGAP24	-0.331	-0.002	-0.037	0.218	0.124	-0.098	-0.045	0.314	0.062	0.08	-0.116	0.183
UGCGL1	0.133	-0.07	0.075	-0.129	-0.029	0.091	0.046	-0.262	0.097	NA	-0.046	0.032
VRK3	0.119	0.295	-0.027	0.064	0.138	0.094	0.116	-0.078	0.03	0.054	-0.024	-0.675
FAM108B1	0.006	-0.164	0.185	0.019	-0.016	-0.056	-0.128	0.1	0.2	0.151	0.161	0.113
CYP11B1	0.104	0.073	0.11	-0.107	0.003	-0.021	-0.15	-0.019	-0.008	-0.127	-0.151	-0.08
RPS26	0.088	-0.027	0.048	0.037	-0.002	-0.316	-0.253	-0.034	0.206	-0.012	0.078	NA
CCM2	-0.02	0.32	0.071	-0.018	0.154	0.023	-0.041	0	0.006	0.042	0.16	-0.359
PDE8B	0.136	-0.001	0.25	0.214	0.078	0.182	0.085	0.326	-0.009	0.16	-0.271	0.01
SLC35F1	-0.155	0.049	-0.126	0.299	0.267	-0.142	-0.081	0.326	1.18	NA	0.106	0.846
KCTD21	NA	NA	NA	NA	NA	NA	NA	NA	NA	-0.046	NA	NA
PLEKHG1	0.037	0.101	-0.271	0.382	-0.063	0.112	-0.22	-0.703	0.043	NA	0.02	0
WDR45	0.032	0.176	0.062	-0.035	-0.213	-0.072	-0.358	-0.049	-0.08	0.081	-0.17	0.234
ZFAT	0.309	0.165	0.151	0.115	-0.261	0.016	0.069	-0.1	0.029	NA	0.017	0.014
TTLL13	NA	NA	NA	NA	NA	NA	NA	NA	NA	-0.331	NA	NA
ZNF16	0.042	0.204	0.011	0.123	0.008	0.012	0.039	-0.126	-0.074	0.12	0.123	0.001
METT11D1	0.051	-0.066	-0.005	-0.005	-0.026	-0.303	0.098	-0.025	0.027	-0.018	-0.057	NA
SLC10A7	-0.174	-0.76	-0.031	0.052	0.101	0.069	-0.067	-0.297	-0.02	0.021	0.035	NA
GRB7	-0.024	0.826	-0.079	0.034	0.122	-0.216	-0.036	-0.473	0.213	-0.036	0.3	0.345
CPLX3	NA	NA	NA	NA	NA	NA	NA	NA	NA	0.158	NA	NA
AP2B1	0.027	0.122	-0.303	-0.114	-0.184	0.316	-0.008	0.045	-0.303	0.24	-0.042	-0.154
AP1G1	0.232	0.338	0.027	0.133	-0.518	-0.105	0.013	-0.208	0.218	-0.208	0.124	0.176
OPN4	0.024	NA	0.044	-0.061	0.042	0.145	-0.108	NA	-0.018	0.054	0.015	NA
APRT	0.032	-0.02	-0.044	0.067	-0.133	-0.087	0.03	-0.094	-0.061	0.046	-0.026	-0.048
SUNC1	-0.059	NA	0.15	0.151	0.113	0.171	-0.078	NA	-0.023	-0.198	-0.07	NA
KLK3	0.046	-0.156	0.235	-0.177	-0.021	0.013	-0.106	0.072	0.005	-0.102	0.087	-0.099
ARNTL	-0.13	0.548	0.087	-0.034	0.169	0.083	0.018	-0.483	-0.032	-0.266	-0.526	0.135
SPN	0.122	NA	0.032	0.064	0.035	0.002	-0.081	NA	0.052	0.028	-0.005	NA
ALDH3B2	0.268	-0.038	-0.04	-0.17	-0.164	0.183	-0.311	-0.046	-0.101	-0.033	-0.078	-0.322
LOC57228	0.089	-0.185	0.08	0.068	0.123	0.165	-0.3	0.06	-0.006	0.06	0.107	-0.069
ZNF816A	NA	NA	NA	NA	NA	NA	NA	NA	NA	0.148	NA	NA
MSRB3	-0.167	-0.662	-0.151	-0.139	-0.022	-0.16	0.132	-0.19	-0.292	NA	-0.038	-0.125
SFRS7	0.137	-0.016	-0.058	0.038	0.09	0.251	-0.086	0.084	-1.292	0.155	-0.253	-0.098
TP53BP2	-0.061	0.271	-0.206	-0.192	0.052	0.055	0.122	0.259	0.114	-0.021	0.147	0.211
PLAA	-0.093	0.114	0.16	-0.113	-0.169	-0.11	-0.002	0.261	0.131	-0.022	-0.213	0.079
SCMH1	-0.021	0.081	-0.028	-0.001	0.089	0.074	0.212	0.046	-0.875	-0.258	-0.19	-0.12
NT5DC3	-0.464	NA	0.174	0.311	-0.199	0.257	0.233	NA	-0.846	0.088	-0.12	-0.18
SEMA5B	NA	0.013	NA	NA	NA	NA	NA	0.044	NA	0.016	NA	0.186
C3ORF75	NA	NA	NA	NA	NA	NA	NA	NA	NA	0.072	NA	NA
KLHL7	-0.016	0.069	0.032	-0.201	0.298	0.035	-0.174	-0.356	0.278	0.18	0.014	0.042
ERGIC1	0.116	-0.311	0.01	0.054	0.047	0.012	0.056	0.009	0.123	NA	0.007	0.035
OBFC2A	-0.158	0.235	-0.073	-0.282	0.19	0.112	0.072	0.515	0.074	0.03	0.239	0.041
CRELD1	-0.124	0.397	0.029	-0.023	-0.015	-0.011	-0.045	-0.006	0.041	0.011	0.093	-0.022
ZNF613	-0.023	0.288	-0.072	0.045	-0.337	0.022	0.081	-0.102	0.036	NA	0.119	-0.223
DNAJB14	-0.24	NA	-0.314	-0.051	0.24	0.323	-0.282	NA	-0.039	0.101	-0.283	NA
C19ORF12	0.14	0.478	-0.18	0.462	0.823	-0.112	0.075	0.103	0.43	0.52	-0.082	0.013
FDX1L	NA	0.07	NA	NA	NA	NA	NA	-0.026	NA	-0.095	NA	NA
CCDC78	-0.013	NA	0.123	-0.08	-0.006	0.071	-0.09	NA	-0.066	0.267	0.081	NA
MANEAL	0.122	-0.26	-0.084	0.064	0.315	0.157	-0.184	-0.031	0.233	0.38	-0.012	-0.06
C10ORF72	-0.316	0.031	0.204	-0.042	-0.434	0.313	-0.221	-0.101	-0.21	NA	-0.027	0.158
LYPD5	-0.084	NA	0.009	-0.042	-0.015	-0.06	-0.05	NA	-0.153	-0.099	0.047	NA
LLGL2	0.124	0.103	0.002	0.254	-0.003	0.157	0.119	0.035	0.143	NA	-0.285	-0.035
ALDH3A2	-0.024	0.038	0.025	0.181	0.08	0.188	-0.022	-0.254	-0.045	0.101	-0.05	-0.386
PSG6	0.109	-0.022	0.092	-0.131	-0.272	0.275	0.219	-0.049	0.015	0.505	-0.153	-0.083
RCE1	0.169	0.317	0.129	0.146	0.033	0.102	0.038	-0.181	-0.085	0.059	-0.072	0.142
TMPO	0.101	0.149	0.096	0.054	0.03	-0.012	-0.061	0.226	-0.232	NA	0.046	-0.262
UBE2V1	0.306	0.066	-0.1	0.182	0.354	0.071	-0.05	0.111	0.149	NA	0.104	-0.134
PSRC1	0.185	NA	-0.377	0.217	-0.028	0.496	-0.615	NA	-0.073	-0.301	-0.453	NA
SERPING1	-0.063	0.069	-0.099	0.13	0.037	-0.131	-0.009	-0.179	-0.105	-0.008	0.012	0.114
STK24	-0.07	0.158	-0.094	-0.158	0.072	0.011	0.001	-0.116	-0.577	0.021	-0.072	0.165
SPINT1	0.05	0.347	-0.037	-0.036	0.048	-0.036	-0.026	0.053	0.128	0.171	-0.005	-0.241
ZNF226	-0.111	0.436	-0.057	-0.109	-0.075	0.199	0.105	-0.206	0.241	-0.042	-0.213	-0.041
SULT6B1	NA	NA	NA	NA	NA	NA	NA	NA	NA	-0.02	NA	NA
PQBP1	0.03	-0.048	0.006	0.127	-0.006	0.09	-0.034	0.071	0.037	0.263	0.035	0.066
LCMT1	-0.016	0.242	0.05	0.162	-0.012	0.047	-0.032	-0.014	-0.433	NA	-0.048	-0.037
HNRNPH2	-0.015	0.054	-0.202	-0.214	0.204	-0.518	0.1	0.187	0.364	-0.121	0.032	-0.124
KYNU	-0.063	-0.351	-0.025	-0.17	-0.005	-0.224	-0.073	0.405	-0.153	NA	0.221	0.13
RRM1	0.006	-0.176	0.04	0.097	-0.267	0.011	0.057	0.044	0.164	-0.037	0.006	0.04
RPAIN	NA	NA	NA	NA	NA	NA	NA	NA	NA	0.003	NA	NA
FBXO7	-0.012	-0.137	0.063	0.007	-0.031	-0.15	0.116	-0.596	-0.498	-0.202	-0.002	0.165
EXTL2	-0.115	0.307	-0.54	-0.037	0.221	0.169	-0.073	-0.085	0.312	-0.063	-0.019	0.222
CYFIP1	0.04	-0.104	-0.019	-0.076	0.059	-0.02	0.076	-0.13	0.031	0.21	-0.023	-0.088
FAIM	-0.204	-0.22	-0.019	-0.073	0.115	-0.095	0.02	-1.011	0.024	0.235	0.218	0.06
GLUL	-0.016	-0.076	0.018	0.022	0.069	-0.039	-0.075	-0.186	-0.034	-0.026	-0.019	0.264
GPR155	-0.327	NA	-0.17	0.178	-0.58	-0.497	-0.169	NA	-0.448	-0.404	-0.214	NA
NPNT	NA	NA	NA	NA	NA	NA	NA	NA	NA	-0.733	NA	NA
AIPL1	0.2	-0.078	0.22	-0.361	0.161	-0.066	-0.061	-0.039	0.076	0.095	0.086	-0.069
AMD1	0.002	-0.143	-0.152	-0.143	0.053	0.147	0.04	-0.041	0.018	-0.279	-0.076	0.117
TAAR2	-0.024	0.032	-0.017	0.309	-0.081	-0.035	-0.046	-0.154	-0.19	0.028	-0.268	-0.108
MYCL1	0.109	0.388	0.079	0.199	-0.037	0.056	-0.142	0.212	-0.301	NA	-0.151	0.05
HAT1	0.07	0.092	-0.107	0.058	0.139	0.19	-0.024	0.003	0.123	0.025	-0.033	0.129
SRGAP3	0.001	NA	0.084	0.01	0.058	0.206	0.032	NA	-0.088	0.277	-0.077	-0.073
TMEM98	-0.088	0.019	-0.076	0.162	0.01	-0.061	-0.039	0.09	-0.094	-0.179	0.044	-0.021
WIPI2	0.084	0.236	-0.045	-0.002	0.099	0.047	0.066	0.028	0.142	0.043	0.099	0.068
CSTF1	0.161	-0.191	-0.028	0.03	-0.084	0.179	0.015	-0.015	0.071	-0.062	0.103	-0.045
C19ORF62	0	0.204	0.038	0.095	0.121	-0.039	0.014	-0.042	0.042	-0.587	0.231	-0.027
DYX1C1	0.051	-0.135	0.244	0.175	0.027	0.134	0.043	-0.212	0.455	1.211	-0.137	-0.155
PHF12	-0.405	0.056	0.218	-0.083	0.146	0.191	0.068	-0.035	-0.073	-0.064	0.046	0.398
AMZ2	0.033	0.087	0.018	0.113	0.002	0.203	-0.063	0.034	-0.501	-0.377	0.06	-0.019
PRKCZ	0.006	0.097	0.058	-0.028	-0.376	-0.409	0.149	-0.242	-0.358	-0.277	0.003	-0.099
KIAA0774	0.139	-0.103	0.081	-0.103	0.2	-0.085	0.244	0.276	0.42	NA	0.338	0.349
BBS9	-0.051	0.231	-0.032	-0.3	-0.257	-0.314	0.456	-0.099	0.32	NA	0.187	-0.126
LY9	0.227	0.265	-0.091	-0.024	0.58	-0.068	0.261	0.374	-0.375	-0.08	0.087	-0.023
CABP1	0.083	-0.022	0.003	-0.125	-0.137	0.323	-0.028	-0.173	-0.118	-0.166	0.039	-0.146
NOP2	0.082	-0.205	0.077	-0.177	0.204	0.13	-0.025	0.064	0.064	0.035	0.062	0.009
RPL3	0.072	0.106	0.084	0.038	0.051	-0.437	-0.234	0.099	0.209	-0.052	0.108	NA
DCLRE1C	0.022	0.182	0.058	-0.008	-0.171	-0.234	-0.022	0.105	0.029	-0.078	-0.043	0.007
ACADVL	0.084	-0.378	0.047	-0.008	-0.236	-0.235	0.175	-0.286	-0.163	-0.085	0.005	-0.017
TIAL1	-0.083	0.178	-0.024	-0.011	0.108	0.116	0.058	0.316	0.073	0.064	-0.036	0.006
CALCA	0.073	-0.067	0.007	0.065	0.041	0.191	-0.116	-0.426	0	0.125	-0.112	-0.018
RRM2	0.096	-0.423	0.02	0.001	-0.237	0.311	0.225	0.31	0.091	-0.153	0.311	0.143
DMAP1	-0.141	0.11	-0.02	-0.059	-0.08	0.383	-0.136	0.108	0.143	0.032	0.147	-0.138
ERP29	0.157	-0.047	0.059	-0.246	-0.26	0.215	-0.027	-0.031	-0.139	0.038	0.057	-0.034
FAM134B	-0.123	0.106	0.328	-0.481	0.015	-0.119	0.029	0.147	-0.036	-0.786	-0.055	0.016
RPGR	-0.306	0.01	0.022	0.053	-0.047	0.034	0.078	0.246	0.211	NA	0.094	0.121
KCNIP3	0.053	0.031	-0.032	0.059	-0.073	0.063	0.096	0.003	0.134	-0.437	0.128	0.033
RBM35A	0.142	-0.04	-0.017	-0.063	-0.24	-0.013	-0.094	0.134	-0.077	0.11	-0.021	0.026
RABGAP1L	0.132	-0.319	0.329	0.047	0.119	0.165	-0.063	-0.708	-0.353	0.333	-0.191	-0.03
SRA1	0.064	0.477	0.019	-0.068	-0.232	-0.138	0.015	0.131	-0.079	-0.385	-0.133	NA
UFD1L	0.007	0.051	-0.047	-0.048	-0.121	0.025	-0.037	-0.105	-0.076	0.065	0.037	0.02
VPS26A	0.075	-0.261	-0.01	0.166	0.015	-0.091	-0.886	0.083	-0.04	0.08	-0.233	-0.134
CEP250	0.063	0.418	0.08	-0.02	0.096	-0.236	0.116	-0.031	0.013	0.25	-0.187	-0.064
RYR3	-0.078	-0.205	0.022	0.209	0.108	0.025	0.148	0.019	-0.112	0.011	-0.032	0.003
HHLA3	0.169	-0.034	-0.035	0.042	-0.081	0.095	0.054	-0.01	-0.121	NA	-0.025	0.088
SCN1B	-0.027	-0.178	0.016	0.162	-0.309	0.302	0.21	0.241	-0.866	NA	-0.029	0.164
NRCAM	-0.263	0.215	0.436	-0.327	-0.242	0.882	-0.033	0.035	NA	-0.059	-0.014	-0.055
MGC12966	NA	0.263	NA	NA	NA	NA	NA	-0.13	NA	-0.097	NA	NA
FOXK1	0.196	NA	-0.079	0.007	-0.002	-0.136	-0.029	NA	-0.083	0.395	0.174	NA
ACOT9	-0.029	NA	-0.019	-0.008	0.012	0.129	0.013	NA	-0.018	0.038	0.132	0.097
ACPL2	0.238	NA	0.061	0.172	0.05	-0.188	-0.123	NA	-0.147	0.146	-0.256	0.027
ARL5A	-0.017	0.255	-0.347	0.125	0.199	0.09	0.035	0.217	0.271	NA	0.094	0.08
GGPS1	0.051	-0.306	0.007	0.034	0.187	0.183	0.014	0.128	-0.306	-0.048	-0.068	0.125
PARD6A	0.087	0.961	-0.137	0.119	0.012	0.234	-0.014	-0.096	0.143	0.067	-0.183	-0.195
EIF3B	0.064	-0.719	0.033	-0.024	0.014	-0.524	-0.236	0.103	0.244	-0.05	0.068	NA
CMTM5	0.09	0.131	-0.028	-0.023	0.034	0.011	-0.006	0.122	-0.089	0.017	-0.044	-0.025
BCO2	-0.073	NA	0.056	-0.108	0.204	0.17	0.145	NA	-0.281	-0.125	0.086	NA
PALM2	0.163	NA	-0.064	-0.033	-0.1	-0.062	0.043	NA	0.018	0.005	0.089	NA
PAP2D	NA	NA	NA	NA	NA	NA	NA	NA	NA	-0.19	NA	NA
CCDC46	0.044	-0.305	-0.055	0.275	0.193	-0.223	-0.017	-0.475	-0.081	0.766	-0.007	0.128
STAU1	-0.513	0.09	-0.005	-0.026	-0.229	-0.058	-0.154	0.075	0.189	0.02	-0.415	0.141
CNGA4	NA	NA	NA	NA	NA	NA	NA	NA	NA	0.236	NA	NA
CYFIP2	-0.131	-0.668	-0.047	-0.255	-0.157	0.118	-0.046	0.159	0.075	-0.143	0.362	0.097
USP14	0.059	-0.212	0.046	-0.09	0.109	-0.059	0.104	-0.135	0.05	0.144	-0.161	-0.268
PRIC285	-0.105	NA	0.079	-0.027	0.31	0.497	-0.138	NA	0.234	-0.281	0.11	NA
PDE4B	0.191	0.462	0.059	-0.011	0.055	0.098	-0.598	-0.024	0.113	-0.021	0.033	-0.246
CDKL5	-0.028	0.012	0.056	0.006	-0.015	-0.054	-0.058	0.067	-0.034	NA	-0.04	-0.043
GON4L	0.014	-0.048	0.073	0.029	0.108	0.017	0.102	0.049	0.315	0.02	0.095	0.048
PHYH	-0.073	0.152	-0.168	-0.026	-0.031	-0.309	0.091	-0.016	0.052	0.139	0.034	-0.094
SCML1	0.229	0.174	-0.634	0.811	0.404	0.002	0.372	0.399	0.173	0.316	-0.443	0.546
AGPAT3	0.027	0.346	0.025	-0.152	-0.041	0.091	0.013	-0.223	-0.083	-0.064	-0.007	0.109
SCD5	0.023	0.121	-0.08	0.367	0.14	-0.173	-0.551	-0.049	0.066	-0.086	0.083	0.241
CTLA4	-0.253	-0.092	-0.083	0.335	0.136	0.275	0.148	0	-0.057	NA	-0.212	0.041
PARL	0.074	0.177	0.181	-0.008	0.149	-0.276	0.158	-0.18	-0.132	0.056	-0.039	-1.069
EEF1B2	0.102	0.116	-0.009	0.075	-0.052	-0.1	-0.106	-0.057	-0.053	NA	0.005	-0.003
LOC652968	NA	-0.049	NA	NA	NA	NA	NA	-0.106	NA	-0.248	NA	NA
HSD17B10	0.027	-0.687	-0.077	-0.011	-0.183	-0.156	0.001	0.091	-0.215	NA	-0.045	-0.095
ZNF284	NA	NA	NA	NA	NA	NA	NA	NA	NA	-0.016	NA	NA
REV1	-0.073	-0.446	0.127	0.213	-0.054	0.218	-0.002	0.022	-0.096	0.066	0.012	0.235
ALAS2	0.035	0.009	0.044	0.033	0.019	0.155	-0.017	0.052	-0.041	0.082	-0.093	0.008
SLC38A10	0.02	-0.092	0.04	0.014	0.007	-0.044	-0.016	-0.272	-0.116	-0.349	-0.011	NA
SCNN1A	0.043	0.015	-0.01	0.052	0.068	-0.028	-0.019	0.022	0.041	-0.082	0.098	-0.106
DLX1	-0.475	NA	0.139	0.191	-0.083	0.317	0.049	NA	0.124	-0.008	0.16	NA
CDC42SE2	-0.051	0.145	0.086	0.06	0.074	0.086	0.005	-0.202	0.018	-1.54	0.064	0.038
SCNN1G	-0.02	0.02	-0.056	0.039	0.041	-0.003	-0.064	-0.063	-0.027	NA	0.017	0.092
PRPS2	0.112	-0.224	-0.118	-0.053	-0.212	-0.015	0.001	0.103	-0.009	0.091	0.308	-0.054
ALOX15B	0.042	-0.11	0.043	-0.102	0.083	0.003	-0.014	-0.006	0.024	-0.046	-0.04	-0.017
C20ORF27	-0.051	-0.883	0.021	0.149	-0.028	0.028	0.116	0.239	-0.153	NA	-0.055	0.006
TRIOBP	0.174	0.578	0.048	0.177	-0.286	0.065	-0.055	0.169	0.086	0.302	0.073	-0.048
ATP5J2	0.018	0.17	0.005	0.031	-0.041	-0.041	-0.103	-0.052	-0.049	0.01	-0.055	-0.068
TTPAL	0.033	NA	-0.114	-0.125	0.114	0.012	0.019	NA	-0.163	-0.022	0.082	NA
EFEMP1	0.014	0.205	0.157	-0.065	0.252	-0.191	-0.023	0.004	0.169	0.048	-0.014	0.212
DPP6	0.131	0.1	0.062	-0.006	-0.013	0.021	0.08	-0.287	0.151	-0.232	0.03	-0.093
SLC25A29	-0.074	-0.349	0.042	-0.002	-0.03	0.089	0.05	-0.129	0.217	-0.026	-0.054	-0.114
ATP6V1C2	0.037	NA	-0.088	0.097	-0.15	-0.598	-0.124	NA	0.138	-0.11	0.249	NA
KIAA1984	0.079	NA	-0.035	0.093	-0.128	-0.152	0.027	NA	0.064	-0.445	0.018	NA
C20ORF7	0.06	0.282	0.075	0.059	-0.095	0.14	-0.018	0.134	0.03	NA	-0.103	0.152
C10ORF25	NA	0.121	NA	NA	NA	NA	NA	0.003	NA	-0.101	NA	-0.035
C9ORF68	0.085	0.01	0.018	0.106	0.085	0.133	-0.044	-0.01	-0.115	0.036	0.245	-0.034
ATP6V0B	-0.001	0.255	0.02	0.021	-0.101	0.123	-0.098	0.053	-0.124	0.084	-0.039	-0.079
ELMO1	0.045	0.145	0.1	-0.023	-0.16	-0.014	0.066	0.026	0.411	NA	-0.133	-0.19
C1ORF175	0.186	-0.009	0.057	0.091	-0.007	0.032	0.018	-0.255	-0.041	0.036	-0.507	-0.047
RGS19	-0.049	-0.211	0.141	0.03	0.142	0.145	0.126	-0.076	-0.206	0.085	-0.111	0.177
MARK2	-0.046	0.002	0.055	0.129	-0.199	-0.067	0.019	0.308	-0.33	0.006	0.017	0.067
KIAA0317	0.174	0.467	0.114	0.12	-0.06	0.359	0.088	-0.038	0.071	-0.081	0.111	0.028
CD151	0.077	-1.04	-0.091	-0.005	-0.014	-0.071	0.055	-0.051	0.131	-0.222	-0.068	-0.036
C11ORF20	NA	NA	NA	NA	NA	NA	NA	NA	NA	-0.067	NA	NA
VWA5B1	NA	NA	NA	NA	NA	NA	NA	NA	NA	0.106	NA	NA
SIRPG	0.015	-0.016	0.033	0.063	0.096	0.047	0.023	-0.027	0.033	-0.277	-0.021	-0.035
MAP2	-0.004	0.297	-0.015	-0.074	0.181	-0.21	0.1	-0.046	0.042	0.347	-0.084	0.143
GK5	NA	NA	NA	NA	NA	NA	NA	NA	NA	0.235	NA	NA
KLHL35	NA	NA	NA	NA	NA	NA	NA	NA	NA	-0.09	NA	NA
RPS4Y2	-0.158	NA	0.06	0.064	-0.12	-0.103	0.027	NA	0.052	-0.287	0.028	NA
KREMEN1	0.082	0.364	-0.015	0.021	-0.085	0.05	-0.045	0.057	-0.323	-0.016	0.059	NA
PICK1	0.033	0.028	0.055	-0.018	-0.028	0.236	0.14	0.063	0.007	NA	-0.061	0.056
PTGFR	0.268	-0.379	0.188	-0.411	0.362	-0.433	0.068	-0.078	1.043	-0.413	0.168	0.405
DPH2	-0.04	-0.287	0.039	0.146	-0.02	0.282	0.041	0.104	-0.016	0.162	-0.04	-0.059
USP9X	0.341	0.178	0.363	0.061	0.055	-0.071	-0.01	0.313	0.246	0.109	0.084	-0.102
IAH1	NA	0.17	NA	NA	NA	NA	NA	-0.226	NA	0.146	NA	NA
ZDHHC19	0.023	-0.095	-0.034	-0.003	0.01	0.085	-0.057	-0.01	-0.05	NA	-0.023	-0.077
PRMT5	0.079	-0.08	0.078	0.036	-0.209	-0.21	0.109	0.055	-0.183	0.269	0.015	0.008
ZNF550	-0.051	0.035	0.035	-0.003	0.367	-0.123	0.254	-0.011	0.32	NA	0.017	-0.097
MTL5	-0.228	-0.021	0.136	0.077	-0.214	0.136	0.046	0.075	0.004	NA	-0.05	-0.111
UNC45A	0.064	0.002	-0.029	0.072	0.182	0.056	-0.035	-0.158	0.184	-0.187	-0.043	0.031
C2ORF60	NA	0.047	NA	NA	NA	NA	NA	0.398	NA	-0.33	NA	NA
SNAPC3	-0.155	0.484	0.106	-0.236	0.131	0.125	0.011	0.172	-0.168	NA	-0.083	0.323
OLAH	-0.354	0.132	0.248	-0.065	0.048	0.569	-0.437	0.072	0.343	0.404	-0.149	0.019
TRO	0.076	0.004	-0.066	0.022	0.072	-0.005	0.013	-0.023	-0.007	0.105	-0.01	0.141
SDCCAG3	-0.036	-0.343	-0.003	0.213	-0.242	-0.192	0.218	-0.203	0.233	0.106	-0.321	-0.091
CBFA2T2	0.057	0.431	0.036	0.094	-0.052	-0.303	0	0.179	-0.144	0.183	-0.048	-0.156
DIO1	-0.379	-0.081	0.692	-0.175	-0.252	0.424	-0.087	0.104	NA	0.08	-0.038	0.061
C4ORF29	NA	NA	NA	NA	NA	NA	NA	NA	NA	-0.186	NA	NA
CBLN3	-0.028	NA	-0.255	0.223	0.1	0.025	0.076	NA	-0.035	0.001	0.085	NA
AIM1L	-0.181	-0.054	-0.086	-0.022	-0.034	-0.326	0.305	0.064	-0.124	-0.071	0.201	0.003
CDC42	-0.006	-0.201	-0.239	0.022	-0.043	0.218	-0.032	0.152	-0.108	0.165	-0.042	-0.244
MDH1B	-0.817	-0.006	-0.113	-0.155	0.222	0.69	-0.282	-0.118	-0.71	0.629	0.995	-0.125
C19ORF36	NA	NA	NA	NA	NA	NA	NA	NA	NA	0.49	NA	NA
FKRP	0	NA	0.031	0.06	-0.137	0.087	0.008	NA	0.034	0.215	-0.034	NA
C19ORF55	NA	NA	NA	NA	NA	NA	NA	NA	NA	-0.335	NA	NA
ZNF384	-0.003	-0.11	0.076	0.049	0.059	0.216	0.127	-0.061	-0.301	0.085	0.179	-0.008
CD79B	-0.018	0.088	0.042	0.074	-0.032	0.051	0.005	-0.03	-0.111	0.018	-0.007	-0.137
INTS6	-0.07	0.042	-0.101	0.039	-0.238	0.058	-0.01	0.04	0.107	-0.019	-0.172	0.006
SLC4A8	-0.138	-0.085	0.748	0.107	0.227	0.876	-0.101	0.047	-0.039	-0.618	-0.17	-0.004
GPER	-0.019	0.782	0.149	-0.256	0.458	0.112	0.269	-0.464	0.214	-0.278	0.267	0.24
SHBG	-0.07	0.049	0.202	-0.065	0.117	-0.022	0.008	-0.073	-0.194	NA	-0.046	0.117
MLLT4	-0.043	0.519	0.099	-0.332	0.009	-0.034	0.043	0.002	-0.117	-0.288	0.136	-0.189
TCERG1	0.035	0.102	-0.109	0.08	0.167	-0.021	-0.171	0.223	0.065	0.188	-0.139	-0.093
CD14	0.081	-0.051	-0.044	-0.059	0.054	-0.029	-0.023	-0.055	0.065	-0.153	0.079	0.079
CD63	0.161	0.045	0.047	0.058	-0.171	0.016	-0.027	-0.161	-0.075	0.055	-0.118	-0.003
CD68	0.112	-0.061	0.047	-0.091	-0.222	-0.058	0.211	0.024	-0.062	-0.47	-0.108	0.15
ENPP2	-0.055	0.071	0.326	-0.301	0.348	0.079	-0.063	-0.4	-0.105	-0.074	-0.068	-0.046
MOSPD3	0.036	NA	0.024	-0.367	-0.03	0.112	0.016	NA	-0.041	-0.046	0.025	NA
C3ORF57	-0.008	NA	0.01	-0.019	0.177	0.086	-0.023	NA	0.115	0.037	-0.002	NA
D4S234E	0.059	0.098	-0.201	0.225	0.14	0.103	0.03	-0.046	NA	-0.094	-0.377	-0.014
MLH3	-0.059	-0.051	0.194	-0.044	0.005	0.08	0.135	-0.152	0.086	NA	0.106	-0.007
MLN	0.139	0.1	-0.048	-0.066	0.061	-0.027	0.074	-0.01	0.058	-0.059	0.025	-0.147
PQLC2	0.031	-0.123	0.013	0.087	-0.136	-0.062	-0.046	-0.056	-0.093	0.081	-0.034	-0.053
ACTR3B	0.051	0.401	-0.421	0.22	0.383	0.097	0.057	-0.023	-0.18	-0.219	-0.148	0.028
CKLF	0.092	0.021	0.046	-0.099	-0.503	0.106	-0.034	-0.155	0.126	0.223	0.027	0.063
SCN2A	0.352	-0.011	-0.054	0.433	0.331	-0.139	-0.249	-0.139	-0.387	0	0.063	-0.109
CHTF8	NA	0.225	NA	NA	NA	NA	NA	-0.278	NA	-0.145	NA	NA
SERPINB7	-0.131	0.364	-0.139	0.229	0.085	-0.083	0.172	0.029	6.681	-0.081	0.169	-0.35
PEG10	0.162	0.63	-0.009	-0.088	0.082	0.042	-0.035	-0.198	-0.119	-0.138	0.044	0.149
SLAIN1	0.141	0.48	-0.239	-0.07	0.05	0.031	0.073	-0.028	0.098	-0.318	0.071	NA
SPOCK3	-0.07	-0.04	0.013	-0.053	0.163	-0.092	-0.088	-0.073	-0.39	0.052	0.272	0.115
C16ORF13	0.007	NA	-0.026	0.024	-0.215	-0.194	-0.045	NA	-0.114	0.145	-0.011	NA
LFNG	-0.581	0.094	-0.129	-0.014	0.159	0.132	-0.382	-0.169	0.425	-0.437	0.106	0.086
CLDND1	0.204	-0.688	0.157	0.235	0.021	0.242	0.015	-0.445	0.061	0.206	0.104	0.047
DNAJC28	0.097	0.951	-0.177	-0.091	-0.068	-0.16	-0.022	0.097	0.234	-0.233	0.012	-0.139
AGTRAP	0.146	-0.204	-0.049	-0.011	-0.01	0.087	0.162	0.021	-0.762	0.05	0.001	-0.104
PAQR3	0.168	-0.615	0.336	-0.844	0.353	0.204	0.112	0.22	0.145	-0.188	-0.221	-0.062
NKAIN2	NA	NA	NA	NA	NA	NA	NA	NA	NA	-0.639	NA	NA
FAM63A	0.075	0.435	-0.12	-0.054	0.108	0.209	0.098	0.163	0.065	0.118	0.004	0.075
DCLK2	NA	0.468	NA	NA	NA	NA	NA	0.096	NA	0.356	NA	NA
ADAMTSL1	-0.084	0.008	-0.098	-0.024	-0.037	0.101	-0.107	-0.028	0.03	0.131	-0.051	NA
TYSND1	0.068	-0.25	0.046	-0.101	-0.029	-0.013	0.144	-0.09	0.018	0.08	0.004	-0.097
ESR2	-0.173	0.094	0.164	0.043	0.084	0.076	0.016	0.145	-0.016	0.238	-0.022	-0.053
CD83	0.24	-0.094	0.103	-0.264	0.118	-0.241	0.1	-0.145	-1.048	-0.191	0.079	-0.002
DMRTC2	-0.167	NA	-0.075	0.014	0.401	0.133	0.213	NA	-1.254	0.007	0.213	NA
PAPD5	-0.19	0.303	-0.585	-0.177	0.249	0.198	0.045	0.394	0.097	0.022	0.105	-0.01
DCUN1D4	-0.269	0.119	-0.198	-0.94	-0.028	-0.009	0.093	0.354	0.055	NA	-0.957	0.245
MTHFD2	-0.138	-0.221	0.129	0.162	0.145	-0.337	-0.063	-0.534	-1.49	0.103	-0.136	0.041
PRDM15	-0.306	-0.022	0.042	0.053	0.16	0.132	0.243	0.162	0.01	0.075	0.095	-0.023
HAGH	-0.09	0.246	0.065	0.011	0.006	-0.049	0.026	0.333	-0.026	0.327	-0.007	-0.062
SPATA7	-0.056	0.608	-0.099	0.005	0.082	0.097	-0.012	0.133	0.094	0.28	-0.006	0.078
PCDH17	0.011	0.432	0.081	0.003	0.119	0.355	-0.101	-0.534	-0.257	0.313	0.005	-0.05
CCDC56	0.117	NA	0.086	-0.057	-0.038	0.003	0.01	NA	0.117	0.105	-0.01	-0.071
YARS2	0.105	NA	0.061	0.021	0.004	-0.022	-0.119	NA	0.028	-0.016	0.036	-0.148
ZBTB8	NA	-0.234	NA	NA	NA	NA	NA	-0.073	NA	-0.011	NA	NA
PHF11	0.029	0.187	0.105	0.02	-0.083	-0.176	-0.065	-0.339	-0.018	-0.092	-0.147	-0.055
ASB1	0.101	0.073	0.066	0.109	-0.027	-0.097	-0.056	-0.055	-0.051	0.219	0.037	0.088
MTMR12	0.092	0.255	-0.572	-0.324	-0.258	-0.179	0.132	-0.913	-0.015	NA	0.028	-0.023
RUFY1	0.044	NA	-0.133	-0.052	0.024	0.181	0.104	NA	0.053	0.099	0.081	NA
FAM63B	0.412	-0.062	0.053	0.065	0.207	-0.422	0.124	-0.297	-0.028	NA	0.105	-0.061
SLC26A6	0.078	0.316	0.047	0.064	0.151	0.278	-0.052	-0.261	0.176	NA	0.222	-0.04
SIDT2	-0.056	NA	-0.087	-0.238	0.356	0.148	0.277	NA	0.191	-1.592	0.067	0.12
RHBDD2	0.095	0.095	-0.16	-0.091	-0.21	-0.034	0.06	-0.078	0.107	0.023	0.042	-0.017
TMEM70	-0.003	-0.147	0.02	0.012	0.083	-0.016	-0.089	-0.199	-0.139	0.047	-0.073	-0.328
ATF3	0.093	-0.325	-0.024	-0.003	0.029	-0.579	0.2	0.133	-0.02	0.124	-0.27	-0.215
NCALD	-0.104	0.199	-0.095	0.059	0.113	-0.012	0.063	-0.119	-0.119	-0.087	0.038	-0.161
PRKAG2	-0.035	0.017	-0.215	-0.09	-0.032	0.052	0.032	0.147	-0.111	-0.278	0.003	0.186
TTC23	0.017	0.181	0.001	0.143	-0.068	-0.066	-0.012	-0.033	-0.097	0.066	-0.007	-0.005
SLC29A4	0.005	0.19	0.021	0.056	-0.03	0.13	-0.03	-0.073	-0.076	0.185	0.075	0.086
C14ORF138	0.116	0.087	0.037	0.06	-0.376	-0.496	0.085	0.132	0.45	-0.047	0.016	-0.327
GAGE1	0.035	-0.064	-0.058	0.067	0.261	0.08	-0.148	0.095	0.376	NA	0.029	-0.069
INCENP	0.052	0.066	-0.088	0.313	-0.076	0.103	-0.026	0.027	0.002	-0.143	-0.246	0.031
FUT6	0.133	-0.167	-0.004	0.141	-0.033	0.061	0.02	0	-0.039	0.097	-0.031	0.094
HEY1	-0.361	0.365	-0.406	0.093	-0.168	-0.002	0.117	-0.348	0.013	NA	0.198	0.29
SYPL2	NA	NA	NA	NA	NA	NA	NA	NA	NA	0.094	NA	NA
GDAP1	0.002	0.446	-0.131	-0.214	-0.22	-0.211	-0.032	-0.019	-0.24	NA	-0.15	0.038
ABCE1	0.089	-0.225	-0.024	0.016	0.188	0.249	0.025	-0.297	0.185	0.046	-0.176	0.093
SI	0.092	NA	-0.68	-0.448	2.055	-6.551	0.334	NA	NA	-0.05	0.721	NA
SLC2A4	0.063	-0.041	0.012	0.023	0.059	0.072	-0.123	-0.058	-0.035	-0.064	0.027	-0.058
G6PD	0.043	0.081	0.054	0.023	-0.14	-0.018	0.01	-1.027	-0.602	0.245	-0.068	-0.071
CYLD	-0.318	0.139	0.171	-0.142	0.073	-0.311	0.138	-0.075	-0.221	0.033	-0.09	0.011
PGP	NA	-0.156	NA	NA	NA	NA	NA	0.032	NA	0.02	NA	NA
INS-IGF2	0.026	-0.007	-0.094	0.071	0.143	-0.012	-0.026	-0.073	0.014	NA	-0.061	-0.227
CCDC41	-0.022	-0.138	-0.239	-0.061	0.159	-0.09	0.01	0.106	0.267	0.19	-0.115	0.153
CEP63	-0.085	-0.031	0.032	0.194	-0.316	-0.05	0.128	0.026	-0.102	0.162	0.081	-0.12
USP44	0.144	-0.075	-0.141	0.049	-0.061	0.016	0.064	0.27	-1.173	-0.046	0.023	0.259
CEP170	-0.111	0.225	0.206	0.039	-0.244	-0.056	-0.029	0.026	-0.084	NA	0.05	0.147
ANKZF1	-0.01	-0.22	0.019	0.124	0.086	0.075	0.06	0.097	0.119	0.135	0.07	0.207
PSPC1	0.03	0.362	0.029	-0.042	0.015	0.12	0.01	0.242	-0.036	NA	0.068	-0.086
ZNF596	0.078	NA	-0.021	0.038	0.02	0.003	-0.08	0.428	-0.023	0.539	-0.016	NA
TFAP2A	0.068	0.186	-0.092	0.07	-0.023	-0.034	-0.112	0.05	0.104	0.014	0.128	0.045
CENPA	0.13	-0.082	0.051	0.183	0.177	0.134	0.026	0.263	0.047	-0.099	-0.191	0.182
C10ORF53	0.207	-0.152	-0.126	-0.011	-0.242	-0.01	0.031	0.025	0.032	NA	0.132	-0.058
C20ORF71	0.151	NA	-0.024	-0.162	0.108	0.008	-0.031	NA	-0.007	-0.225	0.059	NA
CAST	0.083	-0.203	0.041	-0.043	-0.071	-0.387	-0.047	-0.271	0.169	0.059	-0.126	0.127
MST4	-0.129	-0.588	0.083	0.216	0.084	0.2	0.022	0.145	0.054	0.142	0.074	-0.01
FILIP1L	0.133	0.013	0.016	-0.119	-0.12	-0.063	0.067	-0.019	0.117	-0.452	-0.046	0.08
PSAP	-0.014	-0.011	0.011	-0.034	0.049	0.112	0.146	0.083	-0.014	0.037	0.044	-0.06
MLPH	0.123	-0.04	0.023	-0.047	-0.002	-0.092	0.097	0.036	-3.354	0.421	0.04	-0.11
GSDMB	-0.016	-0.008	0	0.064	0.139	-0.13	0.183	-0.167	-0.027	NA	0.152	0.005
ABHD12	0.247	0.421	0.021	0.003	-0.269	0.085	0.06	-0.196	0.011	-0.01	-0.262	-0.067
ACBD5	0.021	0.184	0.019	0.094	-0.267	0.046	-0.353	0.445	0.067	0.27	-0.421	0.112
C6ORF204	-0.044	0.023	-0.212	0.266	-0.093	-0.208	0.014	0.574	-0.112	NA	0.02	0.007
CARHSP1	-0.559	0.299	0.264	0.053	0.09	-0.02	-0.295	-0.322	-0.168	0.258	0.331	0.008
GEMIN8	-0.067	0.029	-0.028	0.055	-0.163	-0.132	0.062	0.113	-0.057	-0.047	0.013	0.087
TPK1	-0.082	NA	0.109	-0.153	0.418	-0.478	0.219	NA	0.146	0.157	0.159	NA
NUPR1	0.071	-0.727	-0.25	-0.212	-0.174	-0.676	-0.175	-0.218	-0.474	-0.028	-0.244	-0.301
DLGAP4	-0.144	0.341	0.097	-0.082	0.08	-0.091	0.088	-0.248	-0.315	-0.15	0.13	0.394
NF1	0.009	0.201	-0.151	0.211	-0.371	0.135	0.268	0.115	0.038	-0.061	0.262	0.097
C6ORF162	0.202	0.141	0.319	0.266	-0.018	-0.254	0.051	0.029	0.056	0.202	-0.449	0.043
SLC12A6	0.007	0.535	0.146	-0.201	-0.346	-0.204	0.018	-0.054	-0.025	-0.069	0.157	0.03
SLC35A2	0.036	0.013	-0.091	0.085	-0.015	-0.067	0.069	0.042	0.039	NA	0.066	0.128
ZNF706	-0.061	0.132	-0.101	-0.037	0.071	0.053	-0.041	0.226	-0.04	0.076	-0.009	-0.037
DIAPH3	-0.007	-0.325	-0.037	-0.037	-0.093	-0.115	0.054	0.277	0.084	-0.095	-0.057	-0.173
MGC13057	0	0.033	-0.105	-0.006	0.116	0.042	0.134	0.02	-0.027	0	0.188	NA
COASY	0.054	-0.058	-0.006	0.088	0.111	0.168	0.198	0.09	0.071	0.125	0.151	0.04
MAZ	0.086	0.141	-0.148	-0.09	-0.401	0.251	0.108	-0.007	-0.636	0.065	0.029	-0.002
NCBP2	0.008	0.031	0.053	-0.729	-0.163	-0.55	0.066	-0.021	-0.056	0.132	-0.165	0.071
GLRA3	-0.575	0.376	-0.03	0.296	-0.045	-0.273	-0.063	0.298	0.155	-0.006	0	-0.191
ATPAF1	0.116	0.224	-0.067	0.031	0.09	-0.048	0.161	-0.016	0.11	NA	0.084	0.125
FEZ2	0.053	0.061	0.034	-0.026	-0.227	0.305	0.011	-0.202	0.159	-0.423	-0.176	0.078
NSL1	-0.309	0.156	-0.206	-0.135	-0.017	-0.122	0.022	-0.194	0.091	NA	-0.093	-0.008
TATDN3	NA	NA	NA	NA	NA	NA	NA	NA	NA	0.07	NA	NA
FRS2	-0.055	-0.55	-0.062	-0.01	-0.044	0.115	-0.091	0.148	0.037	-0.158	-0.065	-0.084
FLJ21865	NA	0.114	NA	NA	NA	NA	NA	0.25	NA	0.102	NA	-0.104
CRTC3	-0.051	-0.72	0.047	-0.512	-0.342	0.056	-0.376	0.169	-0.108	-0.439	-0.015	-0.196
RRBP1	0.128	-0.245	0.171	-0.176	-0.011	-0.335	-0.101	-0.427	-0.164	NA	-0.139	-0.028
CD1E	0.093	NA	-0.025	-0.057	0.072	0.042	-0.081	NA	-0.007	-0.13	0.02	NA
SNUPN	-0.037	0.129	-0.129	-0.138	0.104	0.285	-0.097	-0.167	-0.374	0.175	-0.029	-0.066
C9ORF127	-0.041	0.189	-0.002	0.166	-0.022	0.098	-0.056	-0.016	-0.291	NA	-0.112	0.016
ERBB4	0.249	-0.007	0.37	-0.514	0.391	0.012	0.088	-0.492	-0.194	0.453	0.066	-0.052
TTC14	0.033	0.177	-0.205	-0.119	0.137	0.298	0.084	0.268	0.237	NA	0.006	-0.045
XRN1	-0.121	-0.098	-0.164	0.104	-0.027	-0.276	0.135	0.507	0.145	0.165	-0.024	0.036
DBNDD1	0.146	NA	-0.102	0.143	-0.824	-0.05	0.078	NA	-2.079	0.107	-0.315	NA
PARP2	0.101	-0.107	-0.06	0.102	-0.18	0.185	-0.1	0.22	0.023	-0.031	0.063	0.052
SNX21	-0.025	NA	0.13	-0.015	-0.226	-0.123	0.039	NA	0.058	-0.046	0.107	NA
PLEKHG5	0.014	0.166	-0.181	0.155	0.082	0.159	0.037	-0.431	0.827	-0.624	-0.063	0.009
RERE	0.076	0.622	0.112	-0.08	0.388	0.005	0.167	0.29	-0.686	0.343	-0.465	0.058
SHPRH	-0.446	0.558	0.218	-0.254	-0.096	0.053	0.145	0.242	-1.909	0.113	0.011	0.137
C2ORF86	-0.038	0.045	0.038	-0.021	0.026	0.279	0.047	-0.038	-0.254	NA	0.064	0.043
ZSWIM7	NA	-0.139	NA	NA	NA	NA	NA	0.125	NA	0.244	NA	NA
CLCNKA	0.002	0.04	-0.04	0.005	0.081	0.015	0.009	-0.04	0.018	-0.066	0.057	0.028
RYR1	0.091	0.135	0.175	-0.297	0.327	0.235	-0.01	0.049	0.189	0.582	0.099	-0.047
PVRL2	0.049	0.363	0.056	-0.014	-0.012	0.057	0.023	-0.024	0.027	NA	0.119	-0.163
SEC24B	-0.111	0.188	0.05	0.112	0.132	0.002	-0.007	0.219	0.022	-0.032	-0.01	0.028
FGR	0.088	0.015	0.018	-0.018	0.168	0.051	-0.091	-0.014	0.055	0.072	-0.001	-0.015
STAG2	-0.013	0.416	0.069	0.284	-0.027	-0.052	-0.028	0.212	0.147	NA	-0.199	0.082
TNNT3	-0.155	-0.017	0.041	-0.104	-0.247	0.016	-0.052	0.272	0.118	-0.01	0.125	0.092
FLJ25770	NA	0.216	NA	NA	NA	NA	NA	-0.104	NA	0.567	NA	NA
SLC6A2	0.064	0.12	-0.075	0.105	0.112	0.018	-0.1	-0.087	0.04	-0.079	0.022	0.078
C14ORF43	-0.075	0.159	-0.019	0.298	-0.001	-0.051	-0.006	-0.093	-0.119	-0.31	0.037	-0.024
SMAP1	0.126	NA	-0.031	0.184	-0.091	-0.002	-0.057	NA	-0.077	0.113	-0.074	1.483
ZNF557	0.091	NA	0.168	-0.115	-0.136	0.311	0.006	NA	0.276	0.186	0.167	NA
MUC1	0.205	0.012	0.081	0.117	0.569	-0.045	-0.163	0.224	0.392	-0.052	-0.127	0.022
CSNK1G3	0.067	0.302	-0.001	0.072	0.117	-0.183	-0.001	0.009	0.019	0.185	-0.062	-0.268
SLC6A4	0.085	-0.29	-0.047	0.027	0.116	0.046	-0.07	-0.001	-0.004	0.196	0.084	0.028
SLA	-0.259	-0.336	0.054	0.269	0.246	0.317	-0.327	-0.055	-0.012	0.044	0.134	0.146
SLC12A2	-0.062	-0.84	0.03	-0.001	0.226	-0.086	0.003	-0.154	-0.069	-0.05	0.164	0.037
SRD5A1	-0.028	0.549	-0.129	-0.077	-0.003	0.098	0.051	-0.134	0.219	0.164	0.044	-0.093
NET1	-0.754	0.093	-0.173	-0.283	0.01	-0.017	-0.067	-0.976	0.079	-0.252	0.116	0.448
SST	0.01	0.008	0.059	-0.068	-0.055	-0.005	-0.026	0.002	-0.096	0.273	-0.061	-0.026
SLC7A3	-0.013	0.092	0.014	-0.035	0.092	0.003	0.015	0.046	-0.046	0.365	-0.014	0.073
STIL	-0.095	0.013	-0.063	-0.175	-0.128	-0.216	0.026	-0.05	-0.169	NA	0.114	0.13
RCC1	-0.078	-0.11	-0.112	-0.241	-0.138	-0.096	-0.08	-0.01	-0.084	0.13	0.194	0.131
HIPK3	0.044	-0.447	-0.028	0.09	-0.086	-0.06	-0.088	0.084	0.106	-0.027	0.088	-0.149
REC8	0.061	-0.495	0.109	0.125	0.186	0.17	-0.046	-0.155	-0.225	0.228	-0.101	-0.039
CLCC1	0.324	-0.117	0.211	0.298	0.068	0.157	0.098	0.098	-0.09	0.251	0.158	0.204
SCYL1	0.119	0.135	-0.091	0.154	0.037	-0.072	0.028	-0.088	-0.049	0.288	0.122	-0.002
DBNDD2	0.058	NA	-0.001	-0.077	-0.088	0.024	0.003	NA	-0.187	0.012	0.128	-0.072
ADORA1	-0.129	-0.087	0.043	0.354	0.351	0.464	0.165	-0.158	-0.006	-0.437	-0.035	-0.023
UBL5	-0.003	0.045	-0.021	0.066	-0.038	0.032	-0.12	0.009	0.102	0.021	0.103	-0.119
SSTR1	-0.01	0.011	-0.01	0.11	-0.049	0.033	-0.087	0.002	-0.078	NA	0.066	0.349
SSTR2	0.05	-0.043	-0.057	0.003	0.144	0.057	-0.07	0.089	0.188	0.136	-0.011	-0.059
SSTR3	0.051	-0.035	-0.06	0.013	0.028	-0.076	-0.043	-0.037	0.034	0.088	0.076	0.116
SULT1A2	-0.105	-0.01	0.048	-0.161	0.277	0.052	0.098	0.111	-0.003	0.026	0.073	-0.006
SULT1C2	0.082	0.084	0.121	-0.188	0.119	0.025	-0.089	0.087	-0.102	0.02	0.01	0.246
TACR2	0.03	-0.003	-0.172	0.041	0.107	0.121	-0.026	-0.044	0.077	0.021	-0.021	0.045
TACR1	0.125	0.086	0.036	-0.18	-0.252	-0.132	0.009	-0.044	0.073	NA	0.063	-0.044
TACR3	0.085	0.133	0.103	0.04	-0.13	-0.063	-0.215	0.566	-0.147	0.137	-0.019	0.685
TBXA2R	-0.008	-0.275	0.019	0.033	0.131	0.087	-0.085	-0.248	-0.13	-0.144	-0.139	-0.158
TCN1	0.042	0.061	-0.102	0.016	0.137	-0.07	-0.085	0.138	0.333	-0.098	-0.103	0.277
TF	0.533	0.137	-0.28	0.215	-0.797	0.065	-0.22	0.059	0.351	-0.014	0.083	0.174
TNFRSF1A	-0.018	-0.225	-0.093	0.132	0.077	-0.169	0.033	-0.016	0.205	-0.004	-0.258	0.122
TNFRSF1B	0.184	0	0.082	0.058	-0.011	0.151	-0.025	-0.033	-0.012	-0.085	0.147	-0.093
TOP2A	0.104	-0.118	0.153	-0.016	0.024	-0.1	0.004	0.055	-0.092	-0.253	-0.151	0.224
TOP2B	0.082	0.007	-0.029	-0.029	0.221	0.116	-0.004	0.156	0.114	0.01	-0.037	0.007
TUBB2A	0.012	0.202	0.113	-0.094	0.07	-0.089	-0.288	-0.244	-0.553	-0.09	0.004	0.056
TUBG1	0.106	0.414	0.088	0.151	-0.533	-0.079	0.006	0.429	-0.061	0.124	-0.14	-0.251
TYMS	-0.024	-0.134	0.093	0.19	-0.081	0.121	-0.046	-0.161	0.06	-0.407	-0.01	0.187
UGT2B11	-0.226	-0.321	0.248	0.464	-1.392	-0.125	-0.573	-0.092	-0.918	-0.092	0.123	-0.147
UGT2B7	0.116	0.058	-0.025	0.388	0.067	0.093	-0.091	0.296	-0.008	0.526	0.025	-0.197
TMUB2	0.151	0.095	0.065	-0.226	-0.09	0.251	-0.039	0.024	0.385	-0.421	-0.02	NA
UBTF	-0.046	-0.016	-0.114	0.126	-0.003	-0.097	-0.063	-0.155	-0.015	0.073	-0.085	-0.025
PKD1L2	0.07	NA	0.012	-0.028	-0.083	-0.045	-0.02	NA	-0.014	-0.126	0.035	NA
ZNF391	NA	NA	NA	NA	NA	NA	NA	NA	NA	-0.102	NA	NA
QSER1	0.094	-0.781	0.028	0.112	-0.074	0.342	0.032	0.082	0.01	0.072	-0.292	-0.409
UGT2B17	-0.012	0.189	0.242	0.002	-0.018	-0.049	0.035	0.168	-0.019	NA	-0.158	0.195
CDC14B	0.129	-0.72	0.107	0.325	-0.271	-0.111	0.016	-0.104	-0.081	NA	0.263	0.146
TSC2	0.077	0.022	0.01	-0.055	0.058	-0.016	0.118	-0.118	0.005	-0.074	0	-0.023
ZNF436	-0.155	NA	-0.25	0.066	0.02	0.19	0.116	NA	-0.269	0.109	0.003	NA
PDE11A	0.181	0.512	0.034	-0.548	0.305	0.124	-0.013	-0.608	0.293	0.083	-0.125	0.066
ATG9A	0.29	NA	0.156	0.16	-0.508	0.211	0.041	NA	-0.194	-1.015	-0.125	NA
SFRS12	0.028	-0.207	0.102	-0.329	0.305	0.244	-0.148	-0.011	0.094	0.043	0.15	0.088
SENP7	-0.045	0.306	-0.167	0.078	0.114	0.106	0.044	0.071	0.226	-0.025	0.009	0.01
CSPP1	-0.026	-0.237	-0.013	-0.005	0.084	0.161	0.095	0.143	0.074	0.061	0.005	-0.053
SEC31A	0.132	0.016	-0.044	0.061	-0.046	-0.246	0.009	-0.065	0.146	-0.103	-0.038	0.107
SLC25A45	0.151	NA	0.003	-0.093	0.248	0.12	0.067	NA	0.195	0.197	0.088	NA
UBXN11	0.044	NA	-0.061	0.01	0.05	0.143	-0.063	NA	0.002	0.144	0.068	NA
TMPRSS13	0.092	-0.159	0.02	0.016	0.024	0.036	-0.022	-0.222	-0.086	0.069	0.124	-0.031
ZFYVE19	-0.011	0.038	-0.11	0.168	-0.092	0.1	0.14	-0.099	0.24	-0.334	0.168	-0.065
WIPF1	0.024	-0.327	-0.006	0.052	0.008	0.036	-0.005	-0.001	-0.169	0.282	0.168	0.024
ZNF682	0.145	NA	0.304	-0.214	0.041	0.533	0.214	NA	NA	0.662	-0.066	NA
RBM23	0.039	0.045	0.011	0.028	-0.104	-0.044	-0.075	0.037	0.136	-0.232	0.007	0.028
POMT1	0.126	-0.164	-0.063	-0.08	-0.006	0.073	0.092	0.635	0.105	NA	-0.017	-0.152
DPH5	-0.235	-1.021	-0.009	0.131	0.125	0.012	-0.001	-0.133	-0.029	0.099	0.136	0.054
PNKD	0.049	0.243	-0.001	-0.016	-0.001	-0.033	-0.035	-0.184	0.053	-0.146	0.061	-0.007
FER1L5	-0.162	0.033	-0.238	0.225	0.153	-0.287	0.011	-0.217	-0.222	NA	0.239	-0.305
ACVRL1	-0.08	-0.216	0.052	0.124	-0.04	-0.054	-0.075	0.033	-0.154	0.136	-0.029	0.236
FLJ22167	NA	NA	NA	NA	NA	NA	NA	NA	NA	0.981	NA	NA
LYPD1	0.201	NA	-0.134	0.359	0.024	-0.029	-0.018	NA	-0.074	0.4	-0.145	NA
BCLAF1	-0.001	0.238	0.012	-0.018	0.127	-0.192	-0.04	0.269	-0.002	0.146	-0.357	0.163
HNRNPC	-0.032	0.021	-0.063	-0.076	0.174	0.019	-0.149	-0.085	0.032	NA	0.012	-0.116
PHF16	0.125	-0.091	0.193	0.229	-0.159	-0.132	-0.394	0.029	0.022	0.143	-0.04	0.002
TSEN34	0.125	0.119	0.013	-0.448	-0.117	-0.001	-0.364	-0.043	-0.541	0.065	-1.031	-0.009
PPCS	0.17	NA	-0.186	0.008	0.23	0.268	0.01	NA	0.14	0.171	-0.063	NA
NR1I3	-0.249	0.196	-0.013	0.115	0.161	-0.229	0.018	0.072	-0.179	0.099	0.085	-0.215
SLC38A1	-0.086	-0.034	0.118	-0.114	-0.217	0.214	0.053	0.07	-0.189	NA	-0.181	0.229
GNAS	0.07	-0.083	-0.023	-0.048	-0.112	-0.211	0.021	0.266	0.054	-0.182	-0.012	-0.009
KLK5	-0.122	0.221	0.227	-0.112	0.29	-0.129	-0.018	0.121	-0.263	0.037	-0.001	-0.168
NFKB2	0.038	0.039	-0.082	0.156	-0.199	-0.143	0.117	0.174	-0.129	-0.006	-0.016	-0.272
KLK10	0.021	0.238	0.039	-0.082	0.069	0.046	-0.051	0.205	-0.154	-0.271	0.051	0.131
LRRCC1	0.052	-0.114	-0.065	-0.009	-0.044	-0.101	0.047	0.142	-0.006	0.153	0.173	-0.078
AP3D1	0.031	0.155	0.107	-0.078	0.072	-0.235	-0.262	0.17	0.075	0.019	0.058	-0.456
FBXO43	0.118	-0.215	-0.127	0.195	-0.142	-0.004	0.267	0.225	-0.024	NA	0.123	0.107
C14ORF73	-0.117	0.21	-0.095	0.077	0.05	0.09	0.082	0.075	0.187	NA	0.064	-0.1
TNFAIP8	-0.108	0.077	-0.545	0.066	0.023	-0.229	-0.05	0.189	0.297	-0.105	0.224	0.284
URG4	-0.179	0.115	0.137	0.107	-0.057	-0.176	0.05	-0.18	-0.073	-0.1	0.047	0.06
ALG9	-0.026	0.122	-0.025	-0.343	-0.147	0.248	-0.151	-0.182	0.117	NA	0.044	-0.007
MIER1	0.082	NA	0.181	0.16	-0.112	-0.099	-0.315	NA	0.012	0.031	-0.086	-0.089
ANKRD7	-0.046	0.177	0.105	-0.177	0.005	-0.102	0.047	-0.424	0.248	NA	0.12	0.046
VCAM1	0.01	0.034	-0.019	-0.03	0.144	0.05	0.116	0.11	0.004	NA	0.007	0.17
SFRS1	0.032	-0.235	0.077	0.048	-0.001	-0.543	-0.152	0.125	0.418	-0.086	0.254	0.061
SLC29A1	-0.079	-0.427	-0.076	-0.027	0.215	0.049	0.121	-0.004	-0.014	-1.63	-0.022	-0.108
CDC16	0.074	0.077	-0.043	0.042	0.088	0.178	0.039	0.063	-0.057	NA	-0.013	0.014
TMEM134	-0.113	NA	-0.018	0.096	-0.033	0.228	-0.247	NA	0.148	0.045	0.035	NA
UBN1	-0.069	0.329	0.116	0.045	-0.013	-0.106	0.178	-0.183	-0.425	-0.036	-0.035	0.193
FAM177A1	-0.077	-1.36	-0.128	-0.464	0.199	-0.044	0.131	-0.149	-0.104	0.103	-0.76	NA
DACT1	0.162	0.125	-0.003	0.197	-0.141	0.009	0.042	0.129	-0.024	-0.21	-0.084	-0.08
KTN1	-0.074	0.216	-0.026	0.126	0.04	0.052	0.061	-0.089	0.121	0.125	-0.109	-0.098
PAICS	0.075	0.121	0.085	0.041	0.181	0.039	-0.118	-0.312	0.197	0.002	-0.181	0.156
IKZF2	0.093	0.11	0.006	-0.098	0.007	0.121	0.031	0.371	0.064	-0.051	-0.026	-0.2
ART5	-0.051	NA	-0.062	0.473	-0.373	0.162	-0.063	NA	0.043	-0.249	-0.123	NA
TRAPPC6B	0.111	0.196	-0.04	0.208	0.021	-0.089	0.177	0.001	0.251	-0.25	-0.072	0.201
NKX2-1	-0.096	-0.006	0.066	-0.009	0.373	0.11	0.023	0.07	0.233	0.346	0.025	0.12
TMTC4	-0.204	0.532	0.23	-0.049	0.309	0.146	0.107	0.23	0.346	0.441	-0.191	0.092
CAB39L	0.245	-0.395	-0.006	-0.138	0.532	0.271	-0.092	-0.168	-2.687	0.185	-0.135	-0.152
FNDC3A	0.2	0.365	-0.178	0.074	0.215	0.193	0.061	-0.481	0.309	-0.062	-0.677	-0.007
ETV4	0.096	-0.262	-0.109	0.057	-0.124	-0.033	-0.035	-0.127	0.042	-0.331	-0.04	0.181
KIAA1191	0.062	0.288	0.045	0.04	0.188	-0.373	0.121	-0.038	-0.516	NA	-0.806	0.052
N4BP2L1	-0.172	NA	0.043	0.102	0.013	-0.129	0.096	NA	0.091	0.53	0.252	NA
FKTN	0.201	0.027	0.087	-0.403	0.178	0.132	0.125	-0.022	-0.261	-0.198	-0.086	-0.017
GAA	-0.041	0.042	-0.065	0.024	-0.003	0.051	0.187	-0.207	-0.042	0.192	-0.068	-0.096
DIAPH1	0.384	-0.251	0.423	0.275	0.115	-0.123	0.165	0.005	0.246	-0.125	0.109	0.043
INSR	0.072	0.402	0.092	0.03	0.057	-0.114	-0.018	0.306	0.207	0.19	0.142	-0.108
NLRP3	0.031	-0.036	0.03	0.042	0.029	-0.015	-0.125	-0.13	0.029	0.183	0.018	0.023
LAMA2	0.341	-0.186	0.078	0.7	1.526	0.588	-0.964	0.501	2.391	NA	-0.279	-0.138
OCIAD1	-0.042	0.072	-0.175	-0.028	0.078	0.187	-0.028	-0.038	0.001	0.093	0.011	-0.022
CASZ1	-0.03	-0.021	0.11	-0.165	0.267	0.044	0.028	0.2	-0.235	-0.094	-0.069	0.09
CREBBP	0.148	0.361	0.28	-0.172	0.198	-0.187	0.028	0.156	-0.261	-0.467	-0.028	-0.151
GYG2	-0.131	-0.377	-0.138	0.355	0.192	0.057	0.191	-0.54	-0.21	0.356	-0.145	0.059
GPR64	0.002	-0.671	0.003	0.062	0.287	0.044	0.095	0.472	-0.161	0.148	-0.139	-0.519
DBI	0.072	0.036	-0.041	-0.094	0.114	0.111	-0.085	-0.041	-0.027	0.158	-0.033	0.004
TAX1BP1	-0.077	0.38	0.01	0.115	-0.514	0.128	-0.063	-0.015	-0.385	0.121	-0.167	0.022
BCS1L	-0.11	-0.047	0.017	0.07	-0.017	0.013	0.094	0.008	-0.068	-0.011	-0.144	0.049
PXMP3	-0.03	0.432	0.009	0.037	0.171	0.102	-0.004	-0.521	0.322	-0.027	-0.036	-0.127
HAP1	0.007	-0.007	0.085	-0.043	0.131	0.14	-0.073	-0.052	-0.044	0.059	0.025	-0.18
CUL4B	0.014	0.302	-0.004	0.001	0.189	0.265	0.04	0.086	0.23	0.061	0.084	0.131
CNGA3	0.185	NA	0.024	0.243	-0.154	0.184	-0.091	NA	-6.577	0.054	0.134	NA
PRKD2	0.118	0.011	0.005	0.133	-0.239	0.01	0.043	0.087	-0.147	-0.088	-0.015	0.062
ZNF331	0.139	-0.255	-0.069	0.067	-0.004	-0.17	0.063	0.099	0.03	0.111	0.113	0.004
ALDH5A1	-0.029	0.154	0.158	-0.741	0.1	0.078	0.302	0.347	-0.16	-0.246	-0.011	-0.328
LDB3	-0.121	-0.214	0.144	0.131	0.003	-0.143	0.225	0.174	0.351	NA	0.119	-0.275
PRNP	-0.01	-0.109	-0.099	-0.006	-1.175	-0.024	0.072	0.214	0.449	-0.173	0.048	0.174
CASP8	-0.188	0.061	-0.375	-0.321	-0.239	0.009	-0.002	-0.072	-0.26	NA	-0.242	0.175
ARHGAP9	-0.022	-0.214	-0.109	-0.053	0.42	0.062	-0.1	0.074	0.537	-0.259	0.019	-0.014
GJC1	0.063	0.165	-0.104	0.165	-0.139	-0.043	-0.065	-0.192	0.022	-0.312	0.159	-0.116
KIAA1147	0.164	0.13	0.33	-0.108	0.691	0.387	-0.226	-0.438	0.239	NA	-0.041	0.104
KIAA0146	0.122	0.073	0.021	0.073	-0.121	0.05	-0.05	0.02	-0.005	NA	0.081	-0.015
SLC45A1	0.137	-0.031	-0.003	-0.013	-0.316	0.141	0.072	0.192	0.027	NA	0.001	-0.092
KIAA0368	0.173	-0.187	0.19	0.149	0.086	-0.086	0.061	0.076	-0.272	0.197	-0.123	-0.132
KIAA1881	NA	NA	NA	NA	NA	NA	NA	NA	NA	-0.175	NA	NA
FLJ40125	NA	0.014	NA	NA	NA	NA	NA	-0.18	NA	0.057	NA	NA
FBXO41	-0.1	0.585	-0.225	0.05	-0.002	0.193	0.218	-0.141	0.227	NA	-0.003	-0.018
ZNF433	-0.013	NA	-0.085	0.145	-0.181	0.027	-0.061	NA	0.039	-0.057	0.16	NA
ZBTB38	-0.3	NA	0.098	-0.351	0.178	-0.295	-0.082	NA	0.157	-0.191	0.085	-0.194
CCDC88C	0.076	-0.021	0.147	0.089	0.038	0.176	0.011	-0.055	-0.218	NA	0.082	0.078
SR140	-0.204	-0.118	0.25	-0.419	0.128	0.134	0.017	0.289	0.113	0.108	-0.347	0.195
ZNF629	-0.089	0.276	0.107	0.029	0.051	-0.223	0.039	-0.046	-0.092	0.107	-0.042	0.056
DLGAP3	NA	-0.138	NA	NA	NA	NA	NA	0.037	NA	-0.001	NA	0.059
SHANK3	0.133	-0.458	0.022	-0.007	-0.072	-0.041	-0.036	0.125	-0.065	-0.101	0.101	-0.202
UNC13A	0.066	-0.067	-0.021	0.011	-0.011	0.148	-0.011	-0.21	-0.097	NA	0.215	-0.01
GRIP2	-0.055	0.299	0.313	-0.194	0.126	0.042	-0.027	0.002	-0.024	NA	0.025	0.142
JMJD3	0.227	0.154	0.369	0.03	-0.194	0.085	-0.11	0.33	0.171	NA	0.128	0.046
BEX4	0.38	0.162	0.024	-0.596	-0.049	-0.025	-0.127	0.19	0.162	-0.16	-0.012	0.05
TOX3	0.121	0.139	-0.046	-0.282	0.246	-0.101	-0.229	-0.139	0.666	-1.272	0.156	-0.262
FTO	NA	0.124	NA	NA	NA	NA	NA	0.009	NA	0.09	NA	NA
LMTK3	-0.116	NA	0.044	0.379	0.086	0.177	0.098	NA	0.261	-0.054	-0.06	NA
HSF5	-0.066	0.074	-0.094	0.415	0.065	0.067	0.031	-0.545	-0.024	NA	-0.133	-0.024
SLC38A8	0.055	NA	-0.109	0.04	0.132	-0.085	-0.011	NA	0.043	-0.07	-0.101	NA
INTS1	0.113	-0.006	0.056	-0.098	-0.009	0.011	-0.023	0.014	-0.033	0.019	-0.035	0.011
SLC35F4	0.441	NA	-0.111	-0.084	0.047	0.187	0.149	NA	0.25	-1.07	0.09	NA
TMEM202	NA	NA	NA	NA	NA	NA	NA	NA	NA	0.551	NA	NA
DYNC2H1	0.038	0.439	0.216	-0.198	-0.002	-0.145	0.121	-0.012	0.129	-0.089	-0.088	-0.168
ASPG	0.009	NA	-0.012	-0.003	0.113	0.013	0.005	NA	-0.086	0.084	0.046	NA
BTBD17	NA	NA	NA	NA	NA	NA	NA	NA	NA	0.097	NA	NA
SYCN	0.089	-0.02	-0.024	-0.05	-0.114	-0.004	0.131	-0.064	-0.033	0.012	0.025	0.036
FBXO46	NA	NA	NA	NA	NA	NA	NA	NA	NA	-0.495	NA	0.042
ODZ3	0.015	NA	0.255	0.013	-0.159	-0.298	0.128	NA	0.335	-0.081	-0.038	-0.058
USP45	0.081	-0.406	0.033	0.18	0.224	-0.055	-0.364	0.381	-0.254	0.091	0.037	-0.506
ZNF275	-0.191	-0.055	0.178	0.152	0.217	0.142	0.032	0.046	-0.907	0.155	-0.092	0.045
FOLR4	NA	NA	NA	NA	NA	NA	NA	NA	NA	-0.092	NA	NA
KLKBL4	NA	0.224	NA	NA	NA	NA	NA	0.088	NA	0.07	NA	0.026
ZNF823	NA	NA	NA	NA	NA	NA	NA	NA	NA	-0.091	NA	NA
MEGF9	-0.092	0.877	-0.038	-0.162	-0.013	0.031	-0.398	-0.09	0.05	NA	-0.171	-0.399
TMEM223	NA	0.08	NA	NA	NA	NA	NA	0.104	NA	0.076	NA	NA
SHISA3	NA	NA	NA	NA	NA	NA	NA	NA	NA	-0.148	NA	NA
FLJ12993	-0.178	NA	0.174	0.331	-0.021	0.152	0.075	NA	-0.184	-0.386	-0.038	NA
TBX18	NA	NA	NA	NA	NA	NA	NA	NA	NA	-0.176	NA	NA
TSPAN11	0.019	0.22	-0.113	-0.064	-0.114	0.218	-0.069	0.233	-0.085	-0.033	0.064	NA
CLEC2L	-0.078	-0.184	0.022	-0.044	0.05	0.152	-0.051	-0.019	-0.09	0.002	-0.016	0.018
CPN2	NA	NA	NA	NA	NA	NA	NA	NA	NA	-0.15	NA	NA
LIPK	NA	NA	NA	NA	NA	NA	NA	NA	NA	0.126	NA	NA
CC2D2A	-0.02	-0.77	-0.004	0.226	0.022	-0.167	0.291	-0.267	0.04	NA	-0.157	0.156
FABP9	NA	NA	NA	NA	NA	NA	NA	NA	NA	-0.206	NA	NA
TMC3	0.062	-0.061	0.022	-0.011	0.023	0.017	-0.051	-0.038	-0.083	NA	-0.065	0.07
UNC119B	NA	-0.165	NA	NA	NA	NA	NA	-0.058	NA	0.239	NA	NA
UNC13C	-0.325	0.224	-0.034	-0.151	2.605	-0.042	0.028	-0.022	NA	0.081	-0.104	-0.394
S100A1L	NA	NA	NA	NA	NA	NA	NA	NA	NA	-0.128	NA	NA
AKR1B10L	NA	NA	NA	NA	NA	NA	NA	NA	NA	-0.001	NA	NA
CCDC150	NA	-0.108	NA	NA	NA	NA	NA	0.089	NA	-0.132	NA	0.078
MGA	0.29	-0.235	0.2	0.15	-0.273	-0.1	-0.277	0.27	-0.274	-0.088	-0.375	-0.219
PPP1R1C	0.113	0.044	0.216	-0.248	-0.092	-0.047	0.085	-0.224	0.083	-0.591	0.291	-0.011
TMEM218	NA	0.412	NA	NA	NA	NA	NA	-0.06	NA	0.215	NA	NA
SPI1	0.163	-0.141	-0.035	0.009	-0.04	-0.392	-0.065	0.15	-0.031	NA	0.011	0.06
WDR16	-0.019	-0.029	-0.054	0.046	-0.012	0.067	-0.021	-0.065	0.057	-0.422	-0.009	-0.058
DGKG	0.156	0.226	0.004	0.027	0.208	0.188	-0.144	-0.322	0.998	-0.124	-0.189	0.135
ZNF799	NA	NA	NA	NA	NA	NA	NA	NA	NA	0.18	NA	NA
LOC129293	NA	-0.334	NA	NA	NA	NA	NA	-0.078	NA	-0.068	NA	NA
PRAGMIN	NA	0.101	NA	NA	NA	NA	NA	-0.169	NA	-0.552	NA	NA
MYO1C	0.125	0.007	-0.014	0.143	-0.239	-0.105	-0.027	-0.062	0.077	-0.751	0.055	0.084
PLAGL1	-0.292	-0.556	0.11	-0.494	0.286	-0.122	0.107	0.448	-0.046	-0.991	-0.067	0.207
REPS2	-0.254	0.095	-0.07	-0.031	-0.02	-0.192	0.01	0.047	0.078	-0.005	-0.121	-0.217
DSE	0.024	0.055	-0.072	0.036	0.163	-0.175	0.052	0.307	0.085	-0.024	0.025	0.103
CUBN	0.132	0.097	0.082	0.218	0.009	0.042	0.06	-0.059	-0.014	NA	0.057	0.087
COMMD5	0.076	-0.255	-0.003	0.018	-0.159	-0.038	0.015	0.071	-0.016	-0.246	0.103	0.036
LILRB4	0.186	-0.205	-0.03	-0.001	-0.016	-0.109	0.259	0.051	-0.075	NA	0.171	-0.201
LILRB5	1.237	-0.306	-0.353	-0.253	0.062	0.42	0.134	0.302	-0.076	0.168	-0.09	-0.013
LILRB3	-0.09	-0.013	-0.092	0.164	0.037	0.153	0.121	-0.192	-0.069	0.08	0.042	-0.008
P2RY14	0.541	0.059	-0.15	-0.143	0.135	-0.083	-0.045	0.146	0.057	0.234	0.119	0.039
JMJD6	0.209	0.86	0.237	0.111	0.001	0.01	-0.1	0.37	-0.081	-0.452	0.073	-0.061
CPSF4	-0.159	-0.447	0.04	-0.193	0.36	0.254	0.202	-0.022	0.083	-0.273	0.111	-0.322
DMPK	0.013	0.099	0.013	-0.02	0.094	0.012	-0.096	0.075	-0.052	0.069	0.075	-0.018
LILRB1	0.032	0.023	-0.055	-0.011	0.077	0.01	-0.143	0.091	0.035	-0.023	0.015	0.012
SCN3A	-0.394	-0.046	-0.226	0.035	-0.09	-0.093	-0.014	0.076	-0.235	-0.133	0.02	-0.25
G6PC2	0.395	-0.161	0.017	0.452	0.503	0.157	-0.344	-0.066	0.222	-0.037	-0.067	0.164
ELN	0.02	-0.044	-0.029	0.068	0.029	0.163	-0.053	0.071	0.075	0.038	0.037	-0.017
RGS9	0.088	0.146	-0.017	0.004	-0.008	0.055	-0.083	0.174	0.092	-0.037	-0.037	0.147
CYP4F2	0.108	0.074	0.103	-0.125	0.039	0.108	0.074	0.03	0.077	NA	0.089	0.06
ACD	-0.143	-0.08	0.048	0.092	0.042	0.153	-0.026	-0.025	-0.4	0.174	0.076	0.03
CA10	-0.021	-0.297	0.088	0.347	-0.795	-0.002	0.344	0.291	-5.724	0.035	0.001	-0.369
TCTN1	-0.09	-0.219	-0.05	0.014	0.048	0.114	0.297	-0.181	0.111	0.542	-0.008	NA
RBM9	-0.186	1.556	-0.072	0.195	-0.273	-0.549	0.045	0.151	0.225	0.072	-0.035	0.125
TOM1L2	-0.004	0.235	-0.012	0.1	-0.247	0.082	0.023	0.115	0	-0.368	-0.107	-0.2
C11ORF57	-0.032	-0.119	0.072	0.017	0.2	0.24	-0.412	0.015	0.017	0.278	-0.062	0.122
DDC	0.236	-0.108	-0.113	0.126	-0.07	0.153	0.217	0.045	-0.055	-0.211	0.113	-0.055
CASC1	0.075	0.293	-0.12	-0.122	0.03	0.042	-0.105	0.042	-0.042	0.221	0.123	-0.012
PDE5A	-0.121	0.066	-0.087	-0.081	-0.066	0.182	0.018	0.698	0.116	NA	0.108	-0.012
GNRH1	-0.296	-0.085	0.146	0.212	0.029	0.225	0.155	-0.049	0.141	-0.662	0.097	0.026
ZGPAT	-0.029	0.278	0.027	-0.048	0.03	0.128	-0.005	0.1	0.005	-0.044	-0.018	0.022
PRF1	-0.172	-0.037	0.202	-0.047	-0.264	0.023	-0.035	-0.011	-0.103	-0.151	-0.05	-0.075
ZNF133	-0.032	-0.036	-0.123	0.078	-0.127	0.093	0.045	0.18	-0.165	-0.144	0.044	-0.092
ZFP112	0.126	0.523	0.038	-0.378	0.169	0.128	0.117	0.058	0.144	0.171	0.052	-0.176
FGD3	-0.113	0.1	-0.072	0.008	0.155	0.249	0.084	-0.303	-0.043	0.063	0.016	0.02
RABEP1	-0.092	0.07	-0.037	0.058	0.15	0.097	0.031	-0.017	0.021	0.192	-0.054	0.175
E2F5	-0.168	0.324	-0.434	0.218	0.415	0.369	0.029	-0.382	0.344	-1.82	-0.195	0.112
TMEM214	0.151	-0.109	0.037	0.001	-0.121	0.049	-0.007	-0.018	0.168	0.025	-0.015	-0.019
ROR1	0.295	-0.241	0.278	-0.268	0.298	0.144	-0.236	-0.536	0.044	NA	-0.242	0.14
PTCH1	0.014	0	0.157	-0.197	0.123	-0.405	-0.019	0.052	0.044	NA	-0.06	-0.083
TMEM219	0.065	NA	0.035	0.114	-0.067	0.072	-0.129	NA	0.085	0.06	-0.02	NA
EARS2	NA	NA	NA	NA	NA	NA	NA	NA	NA	0.002	NA	NA
MYO3B	0.009	NA	-0.131	0.311	0.004	-0.19	0.107	NA	-0.087	-0.009	0.001	NA
RB1CC1	0.012	0.008	0.196	0.114	-0.001	0.107	0.13	0.34	0.107	0.13	0.026	0.077
GRIA2	-0.039	-0.05	-0.293	0.402	1.04	-0.82	-0.038	-0.221	NA	0.354	0.007	-0.109
ZBTB40	0.237	0.092	0.136	0.095	-0.172	0.009	0.056	0.293	-0.096	0.05	0.016	-0.081
ANKRD12	-0.015	0.043	-0.106	-0.185	0.077	0.083	-0.129	0.379	-0.038	-0.079	0.036	0.05
STRN3	-0.017	0.283	-0.115	0.046	-0.083	-0.097	-0.594	0.3	0.236	-0.007	-0.391	0.045
C14ORF104	0.081	-0.128	-0.025	0.253	-0.205	0.181	-0.045	0.024	0.178	0.059	0.038	0.132
GPR123	0.023	NA	0.077	-0.068	-0.286	-0.009	0.044	NA	-0.004	-0.167	-0.085	NA
CTBP2	0.038	-0.088	0.061	-0.015	-0.148	-0.165	-0.071	-0.36	-0.124	0.105	-0.116	0.181
C1ORF116	-0.073	NA	0.109	-0.057	-0.019	-0.15	0.014	NA	0.039	0.177	0.182	0.067
C2ORF56	-0.024	NA	0.038	-0.111	-0.104	-0.012	0.034	NA	0.16	0.151	0.029	NA
TMPRSS4	-0.044	-0.079	0.036	0.164	0.034	0.068	-0.095	-0.046	-0.042	-0.114	0.044	-0.044
WDR62	0.154	-0.005	-0.008	-0.059	0.08	0.142	-0.016	-0.07	-0.054	-0.178	-0.166	0.091
PLOD3	0.034	-1.904	0.015	-0.127	0.146	0.039	0.133	-0.093	0.018	-0.074	0.041	0.038
DDT	0.001	0.106	0.064	0.009	-0.011	0.005	-0.134	-0.168	0.043	-0.022	0.078	0.005
SERPINA3	-0.111	0.143	0.055	-0.238	-0.073	0.064	-0.143	-0.125	-0.184	0.606	0.041	0.029
MRAS	-0.253	0	0.007	0.038	-0.459	-0.081	-0.184	-0.14	-0.059	0.435	0.07	-0.104
MORC4	0.163	-0.445	0.126	0.064	-0.04	-0.176	0.018	-0.159	-0.121	-0.063	-0.092	0.039
BTLA	-0.094	NA	-0.077	0.26	-0.041	0.069	-0.152	NA	-0.131	-0.023	0.308	NA
MCC	-0.027	-0.398	-0.172	-0.2	-0.062	-0.241	0.059	0.245	0.251	0.226	0.169	0.192
C17ORF60	NA	NA	NA	NA	NA	NA	NA	NA	NA	-0.028	NA	NA
ARSA	0.025	-0.054	-0.082	0.112	0.049	-0.029	-0.045	-0.04	-0.131	0.002	0.07	-0.089
CTNND1	0.203	-1.512	0.043	-0.019	-0.016	-0.21	0.148	0.049	-0.126	-0.357	-0.151	-0.091
FOXN3	0.166	0.321	0.829	0.141	-0.038	-0.521	-0.533	0.111	-0.341	-1.247	0.185	0.153
IQCF3	0.125	0.042	-0.091	0.018	0.227	-0.007	0.068	0.034	0.069	NA	0.168	-0.136
FAM162B	NA	-0.161	NA	NA	NA	NA	NA	-0.054	NA	-0.2	NA	NA
AADAC	0.223	-0.033	0.034	-0.075	0.014	-0.032	-0.145	0.322	0.387	-0.075	0.078	0.163
AAMP	-0.188	0.206	-0.09	-0.199	0.088	0.282	-0.006	0.039	-0.044	NA	0.039	0.09
AANAT	0.051	0.001	-0.017	0.077	0.019	0.057	-0.153	0.012	-0.004	0.019	0.059	0.06
ABCA3	0.186	-0.214	-0.021	0.007	-0.205	-0.236	0.251	-0.018	0.093	0.197	0.009	-0.094
ABP1	0.077	0.007	0.131	-0.194	0.064	0.308	-0.094	-0.451	-1.962	0.02	-0.076	-0.066
ACACB	-0.506	0.078	-0.147	-0.104	-1.399	0.473	0.055	0.17	NA	0.32	0.014	1.037
TCP11	0.04	-0.073	-0.096	0.069	0.006	-0.058	-0.155	-0.212	-0.004	0.463	0.145	-0.137
CCDC102B	0.128	-0.208	0.022	0.045	0	-0.169	-0.012	0.634	0.201	0.423	0.069	0.042
C5ORF44	-0.13	NA	-0.075	-0.088	0.336	-0.016	0.009	NA	0.193	0.386	-0.123	NA
KIT	0.077	-0.147	0.027	-0.26	0.04	0.062	-0.127	0.185	0.15	0.222	-0.068	-0.123
ACR	-0.064	0.008	-0.003	0.072	0.033	0.056	-0.043	0.367	-0.101	-0.087	-0.049	0.303
SPRR3	-0.864	-0.159	0.165	0.317	0.098	0.174	-0.245	0.097	0.045	-0.023	0.039	-0.023
RPP38	0.008	-0.029	-0.028	0.112	-0.067	0.1	0.017	0.041	0.001	0.111	-0.194	0.057
TMEM22	0.351	-0.306	-0.338	0.001	0.171	0.28	-0.022	0.228	0.049	-0.806	-0.005	0.103
TMEM184A	NA	NA	NA	NA	NA	NA	NA	NA	NA	0.008	NA	NA
OCM	0.099	0.068	0.006	0.038	0.068	0.104	-0.05	0.083	0.114	NA	-0.072	-0.055
GCNT1	0.038	0.151	-0.031	0.183	0.016	0.046	0.142	0.06	-0.087	0.34	0.031	0.043
FUT2	0.231	-0.024	0.127	-0.091	0.032	0.026	-0.037	0.091	-0.101	-0.104	-0.067	0.086
FUT3	0.108	-0.096	0.113	-0.124	0.094	0.101	-0.037	-0.025	-0.113	0.099	-0.015	0.202
GJB1	0.199	-0.048	0.116	-0.411	0.106	0.065	-0.133	0.02	0.069	-0.002	-0.039	0
ACO2	0.094	0.201	0.052	0.1	-0.141	-0.261	-0.442	-0.076	-0.201	-0.053	-0.015	-0.059
GPR1	0.063	-0.046	0.058	-0.047	0.157	0.076	0.021	-0.028	0.11	-0.385	-0.1	-0.363
HIC1	0.05	NA	-0.016	-0.017	0.001	-0.095	0.076	NA	0.005	0.306	0.022	-0.223
HNRNPF	-0.118	-0.441	0.012	-0.033	0.018	-0.094	-0.016	0.145	0.314	0.142	0.049	0.035
HRH1	-0.262	-0.348	0.181	0.092	0.234	-0.075	0.359	0.157	0.14	-0.289	0.081	0.014
LIG4	-0.287	0.602	-0.105	-0.39	0.154	-0.087	0.075	-0.434	0.38	0.073	0.023	-0.022
COPA	0.118	-0.014	0.052	-0.128	0.158	-0.536	0.105	-0.073	0.011	0.061	-0.018	0.031
CRTC1	0.007	-0.178	0.079	0.076	0.005	-0.125	0.044	0.067	-0.031	0.051	-0.109	-0.119
SLC17A3	0.083	0.099	0.031	0.055	0.079	-0.032	0.028	0.013	0.143	NA	-0.081	0.079
ZNF419	0.112	NA	-0.105	0.102	-0.124	-0.126	-0.086	NA	0.032	0.154	0.153	NA
KIAA1217	0.028	-0.146	0.316	-0.014	-0.089	-0.52	0.227	-0.153	0.162	NA	-0.131	0.134
DDX17	0.06	-0.077	-0.022	0.06	0.222	-0.028	0.036	0.25	0.083	-0.092	0.003	0.117
CEACAM21	0.105	NA	0.076	-0.07	0.031	0.028	-0.049	NA	0.067	-0.054	0.012	NA
SGSM2	0.043	-0.227	-0.151	-0.003	0.199	0.394	0.202	-0.058	0.182	-0.053	0.058	-0.011
KIF2A	-0.011	0.04	-0.008	0.139	0.146	0.019	0.01	-1.311	-0.595	0.185	0.033	0.076
PRKG1	0.075	0.329	0.042	0.16	-0.083	0.041	-0.092	0.064	-0.168	-0.454	-0.001	0.125
MRGPRF	-0.19	0.075	-0.004	0.153	0.013	-0.105	-0.2	0.433	0.079	-0.149	0.357	-0.191
MUC20	0.059	NA	-0.037	0.031	0.123	0.038	-0.012	NA	0.044	0.025	0.055	0.094
CADM1	0.04	-0.072	-0.103	0.019	0.252	-0.092	0.217	-0.296	-0.155	0.163	0.215	0.165
GPR116	0.012	-0.399	-0.093	-0.086	-0.068	0.813	-0.039	-0.039	-0.3	0.278	0.062	0.004
HTATIP2	0.013	-1.068	0.004	-0.189	0.2	-0.181	0.167	-0.103	0.241	0.171	-0.515	0.056
CKAP2	0.13	0.195	-0.026	0.14	-0.122	0.025	0.117	-0.31	-0.031	0.074	0.091	-0.083
RFPL2	-0.061	0.41	-0.048	-0.192	0.061	-0.521	0.02	-0.608	-6.836	-0.61	0.023	0.005
RAPGEF3	0.045	NA	-0.006	0.405	0.687	0.211	-0.268	NA	0.685	-0.243	0.015	NA
RFPL3	0.21	-0.014	-0.211	-0.108	-0.07	0.04	-0.185	0.464	0.12	0.113	0.096	-0.125
PNPLA7	0.003	-0.178	-0.043	-0.034	0.136	0.119	-0.069	0.053	0.074	0.151	0.054	NA
PRR4	0.223	0.023	-0.126	-0.085	0.052	-0.016	0.001	0.014	-0.125	NA	0.026	-0.008
HPSE	-0.032	0.065	0.086	-0.171	-0.208	-0.131	0.059	-0.222	-0.048	0.148	0.085	-0.041
RPL31	0.208	-0.088	0.022	0.076	-0.283	-0.291	-0.259	-0.047	-0.088	0.115	0.268	NA
PUS7L	-0.155	0.077	-0.089	-0.197	0.054	0.035	0.073	-0.01	0.001	0.084	-0.006	0.002
MID1	0.228	-0.16	0.213	-0.201	0.039	0.198	0.09	0.359	-0.366	-0.243	-0.156	0.134
C14ORF100	0.1	0.224	0.234	0.101	0.115	0.335	0.078	-0.013	0.165	0.213	0.092	0.088
IRF5	0.07	-0.103	-0.066	-0.165	0.411	-0.236	-0.14	0.314	-0.207	0.061	0.065	0.046
C12ORF44	0.033	NA	-0.024	-0.093	-0.158	0.069	0.053	NA	-0.035	0.074	-0.005	NA
RPP14	-0.264	-0.011	0.038	0.153	-0.17	-0.01	0.057	-0.059	-0.117	-0.012	0.02	0.042
FAM89B	0.091	0.085	0.02	0.165	0.088	-0.185	-0.21	0.136	0.214	-0.137	-0.194	0.103
HIG2	0.111	0.006	-0.183	0.159	-0.138	0.131	0.117	0.031	-0.128	0.041	-0.079	0.095
MID1IP1	-0.149	-0.244	0.055	0.026	-0.811	-0.099	-0.076	-0.246	0.046	0.323	-0.054	0.009
FAM160A2	-0.164	0.652	-0.102	0.175	-0.03	0.205	-0.012	0.321	0.123	0.038	-0.044	NA
TOX2	-0.303	0.459	0.198	-0.065	0.477	0.495	0.008	-0.115	-0.09	0.033	-0.11	NA
C18ORF19	0.015	-0.467	-0.161	-0.044	0.025	-0.04	-0.033	0.099	0.054	NA	0.04	0.183
2017-09-08	-0.331	0.04	-0.053	-0.049	0.179	-0.15	-0.178	-0.129	-0.091	NA	-0.031	-0.013
SRL	0.028	0.02	0.121	-0.144	0.113	-0.14	-0.095	-0.072	0.02	NA	-0.127	0.199
ODZ4	-1.372	0.322	-0.92	0.148	0.206	-0.077	0.242	-0.129	0.298	0.014	0.052	0.257
PDE4C	0.01	-0.003	-0.065	-0.055	0.089	0.001	-0.113	-0.193	-0.134	-0.075	0.049	0.1
MORN4	-0.011	-0.343	-0.173	0.132	-0.126	0.321	0.427	-0.522	-0.233	0.007	0.059	NA
ATXN7L3	0.009	0.714	0.164	0.183	0.139	0.146	0.048	-0.16	-0.109	NA	0.099	-0.035
MS4A15	-0.051	NA	0	0.083	0.126	-0.003	0.1	NA	-0.109	0.146	0.146	NA
ACPP	0.142	-0.875	0.365	-0.065	0.603	0.287	0.292	0.273	1.111	0.829	0.089	0.061
ZNF862	NA	-0.157	NA	NA	NA	NA	NA	-0.353	NA	0.041	NA	NA
CCDC43	-0.004	NA	0.003	0.011	0.241	-0.015	-0.257	NA	-0.406	0.12	0.007	NA
ZNF239	0.014	-0.156	0.078	0.153	-0.051	0.118	0.184	0.01	-0.145	0.223	0.093	-0.13
COQ10A	-0.033	0.34	0.264	-0.092	0.07	0.544	0.032	0.137	0.251	0.241	-0.038	0.004
PRDM8	0.063	1.147	0.105	-0.114	-0.311	0.093	-0.858	-0.623	-0.24	-0.264	-0.07	-0.139
C20ORF12	-0.368	0.106	-0.117	0.003	-0.102	0.241	0.26	-0.27	0.097	0.305	0.15	0.227
EHBP1L1	0.07	-0.17	0.033	-0.137	0.176	-0.066	0.064	-0.005	-0.035	0	0.054	-0.013
GPRASP1	0.1	-0.195	0.093	-0.176	0.027	-0.143	0.071	0.807	0.104	0.078	-0.03	-0.171
MYST3	0.001	0.048	0.095	-0.052	-0.008	0.001	0.072	-0.094	-0.331	0.053	0.148	0.109
CLEC1B	-0.672	-0.296	0.209	0.375	-0.327	-0.02	0.066	0.305	-0.034	-0.039	-0.204	-0.337
BCAS3	0.085	-0.167	-0.095	0.066	-0.029	0.095	-0.035	0.018	-0.057	0.103	0.041	0.007
ULK3	NA	0.049	NA	NA	NA	NA	NA	-0.147	NA	-0.031	NA	0.053
EPHA10	-0.018	NA	0.002	0.024	0.184	0.082	-0.057	NA	-0.051	-0.093	0.099	-0.083
FLJ11151	-0.11	-0.076	-0.021	0.146	-0.305	-0.209	0.05	-0.007	-0.052	0.173	-0.012	0.048
FAM54B	0.109	0.497	-0.098	0.193	-0.092	0.222	0.133	-0.153	0.019	-0.029	-0.224	0.019
ZNF146	0.142	0.069	-0.226	0.172	0.031	0.087	0.067	0.074	0.168	-0.047	0.228	-0.015
RPL22L1	-0.202	NA	0.004	0.022	0.122	0.067	-0.269	NA	-0.048	0.023	0.045	NA
GPR137C	NA	NA	NA	NA	NA	NA	NA	NA	NA	-0.214	NA	NA
LRRN3	-0.153	-0.078	-0.086	0.172	-0.001	-0.087	-0.206	0.158	0.078	0.257	-0.019	-0.354
PTAR1	-0.559	0.28	0.107	-0.023	-0.008	-0.233	-0.752	-0.38	0.063	NA	-0.417	0.214
HIGD1A	-0.11	0.248	0.02	-0.079	0.021	0.072	-0.093	-0.079	-0.017	-0.288	0.059	-0.096
C8ORF79	-0.1	-0.071	0.113	0.08	0.168	0.01	0.083	0.041	-0.038	NA	0.106	0.037
TRIM32	-0.028	0.093	-0.091	-0.068	-0.115	-0.016	0.1	-0.062	-0.388	-0.186	0.054	0.01
TGFA	-0.125	0.313	0.27	-0.074	-0.263	0.435	-0.479	0.091	0.121	-0.318	0.174	-0.097
REPIN1	0.112	-0.011	-0.028	0.041	-0.087	-0.089	-0.065	0.074	0.054	-0.155	0.048	0.014
ADCYAP1	-0.004	-0.239	-0.22	-0.121	-0.528	-0.276	-0.246	-0.31	NA	0.439	0.081	-0.072
C9ORF5	0.136	0.01	0.246	0.132	0.612	0.439	0.05	-0.027	0.102	0.27	0.017	-0.309
CKMT2	0.273	0.57	0.033	-0.274	0.17	-0.112	-0.095	0.092	-0.066	-0.015	0.02	-0.058
MORG1	0.108	NA	0.053	0.007	-0.055	-0.024	-0.005	NA	0.121	0.094	0.191	NA
GOLSYN	-0.195	0.294	0.072	-0.215	-0.174	-0.309	0.12	-0.636	0.234	-0.43	0.308	0.222
CYP4B1	0.026	-0.049	-0.011	0.085	-0.504	-0.065	0.067	-0.893	0.03	0.041	0.003	-0.059
LOC91431	NA	-0.34	NA	NA	NA	NA	NA	0.111	NA	-0.076	NA	-0.033
GGT5	0.054	0.028	0.022	0.052	0.048	0.096	-0.139	-0.031	0	0.216	-0.051	0.058
C4ORF33	0.056	NA	-0.047	0.022	0.017	0.029	-0.065	NA	0.601	0.38	-0.166	NA
ICAM2	0.017	0.065	-0.007	0.074	0.079	0.007	-0.042	-0.074	-0.09	0.099	-0.055	-0.029
MCF2	0.282	-0.043	0.04	0.003	0.004	0.007	0.158	-0.205	0.333	NA	-0.027	0.121
ITPR1	0.199	0.136	0.201	-0.362	-0.006	-0.46	0.041	0.171	0.491	0.035	0.436	-0.012
ACTA1	-0.033	-0.279	0.036	0.045	-0.364	-0.336	0.116	-0.091	0.027	0.003	-0.1	-0.083
ABL2	0.139	-0.108	0.153	0.039	-0.09	0.342	-0.139	0.299	-0.067	-0.097	0.144	0.125
MYH2	0.193	0.047	-0.153	0.15	-0.184	0.017	0.132	-0.141	0.378	0.063	-0.07	-0.146
XRCC3	0.12	-0.26	-0.001	-0.024	0.243	0.07	0.026	0.174	0.183	0.046	-0.034	-0.09
ECE2	0.084	0.018	0.184	0.117	-0.284	0.267	-0.195	0.041	0.169	-0.056	-0.079	0.099
SBNO2	-0.113	-0.323	0.097	0.134	0.062	0.086	0.117	0.304	0.101	-0.134	0.029	-0.065
XPO7	0.13	0.184	0.01	0.35	-0.159	0.084	-0.011	-0.031	-0.183	-0.102	0.011	0.028
PHACTR2	-0.38	-0.158	-0.351	-0.181	-0.172	0.131	0.145	0.166	0.038	0.159	-0.247	0.33
MRVI1	0.067	0.039	-0.089	0.105	0.063	0.129	-0.076	-0.017	0.105	-0.254	0.054	0.031
IMMT	-0.03	0.022	0.03	0	0.093	-0.247	0.012	0.095	0.02	0.061	0.024	0.032
HOOK2	-0.076	-0.066	-0.229	0.255	-0.045	0.125	0.102	-0.28	0.003	-0.001	0.084	-0.125
TMEM192	NA	NA	NA	NA	NA	NA	NA	NA	NA	0.227	NA	NA
RALYL	0.07	0.886	-0.027	0.003	0.064	0.169	-0.077	-0.876	0.119	NA	-0.062	0.201
RAPGEF4	-0.365	0.065	0.452	-0.053	0.472	0.145	-0.059	0.183	0.402	-0.342	0.066	0.324
GARNL4	-0.071	-0.323	0.075	0.177	0.181	0.167	0.183	-0.035	-0.126	NA	-0.104	-0.094
C17ORF62	0.076	-0.271	0.055	-0.193	0.053	0.186	0.033	-0.115	0.214	-0.015	0.11	-0.043
RNASEN	-0.09	0.048	0.009	-0.128	0.13	0.12	0.076	0.179	-0.108	NA	-0.055	-0.117
C19ORF60	NA	NA	NA	NA	NA	NA	NA	NA	NA	-0.065	NA	NA
C21ORF91	-0.13	-0.078	-0.161	0.043	0.023	-0.093	0.011	0.187	-0.009	NA	-0.122	0.024
LOC26010	0.079	-0.154	-0.017	-0.043	-0.145	-0.359	0.024	0.114	-0.06	-0.156	-0.05	0.051
KIAA0895	0.078	0.052	-0.168	-0.057	0.041	0.018	-0.258	-0.029	0.619	NA	0.041	0.098
RAP1GDS1	0.04	0.024	-0.137	-0.075	0.129	-0.123	0.049	-0.127	0.112	-0.015	0.143	0.079
VSIG4	-0.089	0.141	0.15	-0.02	0.068	0.116	-0.022	-0.044	0.084	-0.693	0.015	-0.046
RC3H2	0.381	0.22	0.101	0.279	-0.272	0.247	0.107	0.04	0.189	-0.028	-0.448	-0.083
KIAA0232	-0.09	-0.017	0.156	-0.05	-0.574	-0.064	-0.1	-0.055	0.144	0.132	-0.243	-0.054
SNRK	-0.195	0.253	0.067	-0.524	-0.139	-0.098	0.036	0.208	-0.243	0.145	0.14	-0.22
FAM33A	-0.159	-0.028	-0.148	0.044	-0.092	0.065	0.136	-0.055	0.052	NA	-0.13	0.037
SERPINA10	-0.024	-0.15	0.011	0.15	0.015	0.121	-0.154	-0.095	-0.041	-0.164	-0.078	0.012
CABLES1	-0.002	-0.323	0.085	-0.035	0.276	0.224	0.201	-0.464	-0.017	0.228	0.057	0.207
TROAP	0.009	-0.102	0.033	0.133	0.076	0.017	0.022	-0.012	-0.018	NA	-0.023	-0.038
C17ORF80	-0.018	0.008	-0.031	-0.081	-0.041	0.01	0.046	0.335	-0.083	-0.034	0.086	-0.153
CENPN	-0.109	-0.296	0.068	0.019	-0.135	0.071	-0.003	0.316	-0.078	NA	-0.029	-0.003
ERLIN1	0.042	0.04	0.02	0.345	-0.201	0.193	-0.018	-0.262	0.197	-1.123	-0.087	0.119
TMEM55B	0.228	0.284	0.019	-0.032	-0.405	0.325	0.2	-0.486	0.284	-0.22	-0.102	-0.071
MED7	0.083	0.105	-0.06	0.116	-0.234	0.142	0.052	0.08	0.056	0.004	0.004	0.016
PID1	0.143	0.01	0.083	0.192	-0.068	-0.02	-0.069	-0.004	-0.015	-0.365	-0.167	-0.131
MOBKL3	0.041	0.409	0.03	0.206	-0.691	-0.148	-0.051	0.154	-0.165	0.16	-0.604	0.072
C16ORF46	-0.013	NA	0.061	-0.107	0.203	0.075	-0.059	NA	0.166	0.274	0.027	-0.115
PHYHD1	-0.116	NA	0.15	-0.032	-0.259	0.136	0.087	NA	0.162	-0.008	0	-0.145
PACS2	0.073	0.254	-0.04	-0.101	-0.221	-0.027	0.035	-0.296	-0.674	NA	-0.047	-0.046
KCTD19	-0.052	NA	0.053	-0.033	0.03	0.049	-0.034	NA	0.123	0.005	0.003	NA
TSPAN19	NA	NA	NA	NA	NA	NA	NA	NA	NA	0.332	NA	NA
ACTB	0.07	-0.083	-0.021	-0.069	-0.399	-0.263	0.036	-0.431	-0.339	0.003	0.079	0.046
TMEM176B	0.074	0.005	0.068	-0.174	0.029	-0.001	-0.198	-0.028	-0.002	0.002	0	0.129
SERPINE3	NA	NA	NA	NA	NA	NA	NA	NA	NA	-0.007	NA	NA
LOC199800	NA	NA	NA	NA	NA	NA	NA	NA	NA	0.006	NA	NA
IGLON5	NA	NA	NA	NA	NA	NA	NA	NA	NA	-0.013	NA	NA
LINGO3	NA	NA	NA	NA	NA	NA	NA	NA	NA	0.011	NA	NA
SBK2	NA	NA	NA	NA	NA	NA	NA	NA	NA	-0.033	NA	NA
ZNF541	-0.158	-0.031	-0.156	0.008	0.094	-0.099	0.208	-0.125	0.259	-0.074	0.034	-0.044
NPC1L1	0.202	0.176	-0.316	0.142	0.106	0.056	0.111	0.047	0.242	0.141	0.187	-0.09
COMMD9	0.052	0.013	0.129	0.023	-0.195	-0.329	0.119	0.052	-0.188	-0.039	-0.177	0.083
CXXC1	0.024	-0.381	-0.001	-0.075	0.147	0.193	-0.042	-0.274	0.028	-0.161	0.065	0.007
NRD1	0.108	0.002	0.037	-0.032	-0.179	-0.011	0.092	-0.107	-0.142	0.082	-0.115	-0.066
ACOX3	0.017	0.139	-0.034	0.17	-0.045	-0.227	0.128	-0.066	-0.085	0.172	-0.234	-0.032
INPP4B	-0.032	0.254	-0.168	0.113	-0.819	0.205	-0.015	0.176	NA	0.099	-0.075	0.046
ZNF219	0.065	-0.369	-0.092	0.046	0.019	-0.042	0.044	-0.04	0.096	-0.037	0.126	-0.133
FAM13B	-0.4	0.184	-0.148	-0.257	-0.49	0.165	0.291	-0.177	0.249	-0.007	0.312	0.201
FOXRED2	0.099	-0.003	0.112	0.203	-0.245	0.335	0.109	0.108	-0.453	-0.21	-0.341	NA
SIKE	0.178	NA	0.085	0.109	0.087	-0.002	-0.105	NA	0.088	0.538	0.097	NA
PCTP	-0.568	0.051	0.261	-0.749	0.396	-0.12	0.067	-0.18	0.252	0.013	-0.328	0.009
ALPK1	0.027	0.237	-0.067	0.184	-0.153	0.08	0.244	-0.085	-0.07	NA	0.034	0.131
ZFAND5	-0.106	0.173	0.029	0.008	0.205	0.172	-0.019	0.243	-0.042	0.086	-0.135	0.087
TBC1D8	-0.041	0.585	0.024	-0.031	-0.009	-0.35	-0.223	0.323	0.428	0.278	0.235	0.233
LIPN	NA	NA	NA	NA	NA	NA	NA	NA	NA	0.655	NA	NA
ADH6	-0.199	0.04	0.072	0.152	-0.497	0.087	-0.042	0.257	0.148	NA	0.203	0.235
PPAPDC1B	0.121	-0.337	0.036	-0.113	0.013	-0.148	0.082	0.248	-0.085	-0.215	-0.126	-0.11
C14ORF179	-0.023	0.306	0.062	0.014	-0.132	0.084	0.053	-0.093	0.107	0.611	0.137	NA
C1ORF59	-0.016	0.134	-0.067	0.126	0.073	0.01	0.11	0.069	0.217	-0.033	0.089	-0.081
DTX2	0.044	-0.452	0.093	-0.006	0.061	0.038	0.104	0.15	0.017	NA	-0.097	-0.001
ZNF160	-0.257	0.238	0.192	0.075	-0.374	0.146	-0.07	-0.055	0.102	NA	0.047	0.014
IMPDH1	0.191	0.186	0.174	0.122	0.047	0.344	0.143	-0.173	0.126	-0.319	-0.407	-0.053
ZNF554	0.242	NA	0.141	0.252	-0.053	0.234	0.075	NA	-0.047	0.253	0.423	NA
OTUD4	-0.149	-0.085	-0.174	-0.234	0.02	0.016	0.036	0.146	0.053	0.222	-0.021	-0.081
NTF3	-0.109	0.033	-0.191	0.069	0.104	-0.008	-0.119	-0.076	-0.091	0.037	-0.003	0.003
EPN2	-0.383	-0.068	0.03	0.292	-0.559	0.289	0.17	0.111	0.024	0.239	0.052	-0.117
PSMA4	-0.069	0.129	-0.072	-0.079	0.13	0.118	-0.231	0.158	0.111	0.033	0.041	-0.031
RRAS2	0.056	-0.36	0.036	0.048	0.167	-0.085	-0.123	0.013	0.173	-0.469	-0.169	-0.414
ACTN2	-0.016	-0.189	-0.056	-0.646	-0.14	-0.101	-0.154	-0.202	0.171	0.009	0.228	-0.173
GIGYF2	0.168	0.313	0.163	-0.024	0.026	-0.144	0.039	0.437	-0.279	0.082	-0.068	0.055
PNMA5	0.099	NA	-0.097	0.024	0.126	-0.031	-0.053	NA	0.09	-0.003	-0.025	NA
AADACL3	NA	NA	NA	NA	NA	NA	NA	NA	NA	0.034	NA	NA
FAM70A	0.11	-0.1	-0.028	0.071	-0.065	0.047	0.033	0.1	0.103	-0.23	0.035	-0.118
RPP30	0.078	-0.101	0.093	0.394	0.06	-0.222	-0.13	0.172	-0.17	NA	-0.085	0.175
LOC642587	0.111	-0.012	-0.002	-0.089	0.129	-0.027	-0.067	0.038	0.032	NA	-0.028	-0.033
ELOVL7	-0.166	0.061	0.291	0.125	-0.55	-0.031	-0.535	-0.407	0.036	NA	-0.342	-0.251
ALS2CR8	0.528	0.184	0.105	0.331	-0.527	0.067	-0.041	-0.351	0.311	0.435	-0.827	-0.098
PDE4D	-0.013	-0.061	0.082	-0.051	-0.073	0.057	-0.342	0.041	0.173	0.08	0.098	0.292
PCMTD2	0.158	-0.538	-0.209	-0.162	0.187	-0.095	0.314	0.268	0.153	0.12	-0.394	-0.282
ACSM2B	0.158	NA	-0.223	0.06	0.458	0.019	-0.12	NA	1.837	-0.012	0.186	NA
EVI1	-0.016	-0.585	0.098	0.21	-0.283	0.255	-0.004	-0.641	-0.543	-0.101	0.021	-0.036
FBRS	NA	0.342	NA	NA	NA	NA	NA	0.016	NA	0.095	NA	NA
TLE3	0.045	-0.021	-0.025	-0.058	-0.163	-0.149	0.068	0.033	-0.293	-0.031	0.004	0.047
FAM123C	0.126	NA	-0.017	-0.056	-0.251	0.033	0.078	NA	0.224	0.333	-0.042	NA
TMEM177	0.075	0.184	-0.083	0.251	-0.138	0.024	-0.011	0.147	0.009	0.293	-0.219	NA
RUSC1	0.036	0.214	-0.049	0.284	-0.144	0.188	-0.884	-0.085	-0.04	0.072	-0.021	0.081
LAMA4	-0.1	-0.174	0.051	-0.01	0.037	0.069	-0.095	-0.057	0.09	-0.074	0.079	-0.05
ASH2L	-0.165	0.449	0.037	-0.111	0.201	-0.02	0.134	-0.664	-0.036	-0.062	-0.045	-0.074
PCDH19	-0.06	0.096	-0.008	0.08	-0.008	0.04	-0.037	-0.062	-0.05	-0.44	-0.006	-0.098
TMC5	0.041	-0.422	0.023	-0.024	-0.135	0.133	0.117	0.391	-0.023	0.168	0.108	0.067
NRXN3	0.086	0.188	-0.01	0.016	-0.09	0.107	-0.093	0.274	0.048	0.201	0.039	-0.232
ZFYVE16	0.062	0.161	0.043	0.082	0.054	-0.2	-0.201	0.063	0.024	0.154	0.015	-0.112
TTC21A	0.099	-0.156	0.026	0.143	0.447	0.237	0.032	0.25	0.318	0.317	-0.082	-0.077
ACOXL	-0.363	NA	2.275	-0.719	-0.964	0.093	0.619	NA	6.253	0.045	-0.311	NA
C1ORF26	-0.192	0.304	0.245	-0.343	-0.01	0.183	0.092	-0.154	0.139	-0.223	0.129	-0.138
C18ORF34	1.445	0.007	0.229	-0.058	0.006	0.021	-0.024	0.069	0.103	NA	0.077	-0.019
ATP8A1	-0.16	0.152	0.029	-0.017	-0.387	-0.073	-0.111	0.002	-0.07	-0.118	-0.079	-0.148
ZNF142	0.05	0.434	-0.008	-0.082	-0.044	0	0.088	0.36	0.093	-0.294	-0.049	-0.035
ECHDC1	-0.024	-0.096	-0.044	-0.143	0.001	0.19	-0.017	0.192	-0.036	0.098	0.11	0.052
ZNF83	-0.001	-0.331	-0.749	0.086	0.107	0.197	-0.12	-0.186	0.123	-0.267	0.058	0.007
WEE2	NA	NA	NA	NA	NA	NA	NA	NA	NA	-0.097	NA	NA
SMTNL1	0.079	-0.038	0.076	-0.018	0.097	0.035	-0.068	0.098	0.035	-0.055	-0.098	-0.05
KIF13A	0.13	-0.154	0.107	-0.037	-0.019	0.071	0.017	-0.298	-0.068	NA	-0.236	-0.034
DHRS7C	0.048	NA	-0.024	0.045	-0.087	-0.51	-0.133	NA	-0.045	-0.23	0.005	NA
FBXO45	NA	0.128	NA	NA	NA	NA	NA	-0.244	NA	0.165	NA	0.244
NUDT7	0.079	-0.473	-0.049	0.054	0.086	0	0.126	-0.264	-0.005	0.31	-0.021	0.083
ACVR2B	-0.217	0.465	-0.252	0.58	0.862	0.513	0.095	0.392	0.689	NA	0.179	-0.103
ADAM8	-0.216	0.127	-0.015	0.057	0.067	0.029	0.044	-0.174	0.208	-0.028	0.107	0.036
C12ORF51	0.189	0.366	0.027	-0.146	0.098	-0.219	-0.015	0.404	0.096	-0.061	-0.031	0.01
ZNF250	-0.037	NA	-0.058	0.17	0.047	0.064	0.141	NA	-0.004	0.423	0.118	-0.145
PTPRB	0.218	0.311	-0.024	0.172	0.179	-0.003	-0.107	-0.662	-0.198	NA	-0.005	-0.09
RNFT2	0.306	NA	0.097	0.003	-0.08	0.267	-0.146	NA	-0.095	0.373	0.261	NA
ADAM10	-0.122	-0.231	0.12	-0.018	-0.25	-0.083	0.048	-0.324	0.068	0.006	-0.017	-0.002
GJB6	-0.113	-0.037	-0.003	0.026	0.675	0.033	-0.036	0.245	-0.58	0.203	-0.018	0.093
ZP3	0.012	-0.341	-0.045	0.048	-0.151	-0.145	0.046	-0.18	-1.02	0.068	-0.099	-0.081
RNASE9	NA	NA	NA	NA	NA	NA	NA	NA	NA	0.039	NA	NA
EBF4	0.004	0.02	-0.045	0.055	0.083	-0.039	-0.079	-0.094	0.039	0.046	0.175	0.028
FLNA	0.105	-0.089	0.071	-0.169	-0.11	-0.308	0.095	-0.322	-0.235	0.119	-0.116	-0.111
NAV2	0.135	0.057	0.213	-0.055	-0.056	0.178	-0.031	-0.034	0.386	-0.104	-0.003	-0.048
ACVR1C	0.21	NA	-0.376	0.244	0.506	-0.587	0.13	NA	NA	-0.111	0.581	NA
ACP5	0.187	-0.042	-0.109	0.206	0.002	0.1	0.02	0.023	-0.202	0.188	-0.054	0.464
FBXL13	0.116	NA	-0.184	0.089	0.015	0.134	0.211	NA	0.132	0.114	0.12	NA
CCNA1	0.397	0.365	-0.078	-0.138	0.204	0.071	-0.097	-0.071	-0.798	0.008	0.148	-0.027
NHLH2	-0.035	0.082	-0.014	-0.026	-0.113	0.15	-0.081	-0.022	-0.101	-0.187	0.043	-0.076
ACVR1	-0.552	0.18	0.234	-0.193	-0.766	0.084	0.116	0.099	-0.057	0.004	-0.206	0.08
EZR	-0.053	-0.216	0.019	0.054	-0.426	-0.241	0.017	0.117	-0.073	0.114	0.026	-0.129
LYN	-0.291	-0.017	0.11	0.153	0.068	0.103	-0.066	0.18	0.011	0.367	-0.019	0.075
IGF1	-0.371	0.027	0.039	-0.142	-0.182	-0.034	-0.092	0.082	-0.199	0.071	0.025	0.033
PDE4A	0.117	-0.255	-0.045	-0.004	0.159	0.087	-0.134	0.067	0.087	0.127	0.002	-0.033
DDX54	-0.08	0.122	-0.01	0.014	0.102	0.071	0.003	0.235	-0.048	0.086	0.085	0.012
ADARB1	0.178	-0.464	0.025	-0.163	-0.145	0.046	-0.021	0.221	-0.254	0.023	0.062	-0.118
SCIN	-0.382	NA	0.132	0.007	-0.441	0.023	0.045	NA	0.004	0.115	0.195	NA
TLK2	-0.142	0.123	-0.008	-0.082	0.152	0.011	-0.016	0.062	-0.22	0.194	-0.082	0.154
[truncated: 12,180 more rows]

## Sheet: 4miRNA_HCT116_HEK293
Gene expression fold changes from transfection of 4 miRNAs into HCT116 or HEK293 cells
Gene	mir103.transfec.HCT116	mir7.transfec.HCT116	mir92a.knockdown.HEK293	mir124.transfec.HEK293
A1BG	NA	0.573194	-0.03124	NA
A1CF	NA	NA	0.00430311	NA
A2M	NA	NA	-0.0871285	NA
A2ML1	NA	NA	-0.263478	NA
A4GALT	0.159	NA	-0.013627	NA
A4GNT	-0.13	NA	0.141839	NA
AAAS	0.093	0.078338	-0.13152	-0.280561
AACS	0.25	0.107697	0.0718272	-0.505678
AADAC	NA	NA	0.332875	NA
AADACL1	0.027	NA	NA	NA
AADACL2	NA	NA	-0.0219255	NA
AADAT	0.023	-0.0228312	0.100689	-0.249883
AAED1	NA	-0.124032	NA	-0.333975
AAGAB	NA	0.0793429	-0.162346	-0.434033
AAK1	NA	NA	0.281023	-0.321521
AAMDC	NA	0.276428	-0.026291	-1.7938
AAMP	-0.065	0.200204	0.0988351	-0.179852
AAR2	NA	-0.101832	-0.0291484	-0.961487
AARS	0.115	0.220891	0.269291	-0.282955
AARS2	NA	0.10033	0.0360633	0.194509
AARSD1	-0.071	NA	NA	NA
AASDH	0.019	-0.463261	-0.00659647	-0.473953
AASDHPPT	0.308	-0.00124467	-0.0205687	-0.440534
AASS	NA	-0.525269	0.0682534	-0.292719
AATF	-0.297	NA	NA	-1.07747
AATK	NA	NA	NA	NA
ABAT	NA	0.0201012	NA	-0.266847
ABCA1	NA	NA	-0.0814345	NA
ABCA10	NA	NA	0.198862	NA
ABCA11P	NA	NA	NA	-0.222009
ABCA12	NA	NA	0.0606733	NA
ABCA13	NA	NA	-0.0231864	NA
ABCA2	NA	NA	0.16618	-0.322864
ABCA3	NA	0.361652	0.115406	-0.460104
ABCA4	NA	NA	-0.0276897	NA
ABCA5	NA	NA	0.247959	-0.165041
ABCA6	NA	NA	-0.0820978	NA
ABCA7	0.061	NA	0.0208579	0.0406992
ABCA8	NA	NA	0.0527544	NA
ABCA9	NA	NA	-0.0540218	NA
ABCB1	0.127	-0.214407	0.214628	-0.862502
ABCB10	0.132	-0.270811	-0.00583781	-0.605158
ABCB11	NA	NA	-0.0350808	NA
ABCB4	NA	NA	0.24612	-0.490872
ABCB5	NA	NA	0.00923535	NA
ABCB6	0.158	NA	-0.0164948	-0.222559
ABCB7	0.007	-0.316078	-0.0436123	-0.13132
ABCB8	-0.094	0.301436	0.0882909	-0.179485
ABCB9	0.378	NA	0.107554	NA
ABCC1	0.145	-0.145539	0.049552	-0.458381
ABCC10	0.143	-0.151126	0.0699194	0.076703
ABCC11	NA	NA	-0.0505781	NA
ABCC12	NA	NA	-0.029294	NA
ABCC2	0.196	NA	0.0314742	NA
ABCC3	0.04	NA	-0.0649339	NA
ABCC4	NA	-0.0492196	0.0191575	-0.376942
ABCC5	0.192	0.0996183	0.218116	-0.198244
ABCC6	NA	NA	0.0133698	NA
ABCC8	0.023	NA	0.053475	NA
ABCC9	NA	NA	0.00997717	NA
ABCD1	0.058	NA	0.0705041	NA
ABCD2	NA	NA	0.26764	NA
ABCD3	-0.046	-0.102933	0.0614516	-0.16112
ABCD4	0.076	-0.144008	0.0350522	-0.391835
ABCE1	0.321	-0.00210407	-0.0259791	-0.712337
ABCF1	NA	0.38425	NA	-0.364933
ABCF2	NA	0.0753457	0.0930426	-0.228814
ABCF3	-0.077	0.389849	0.0562645	-0.446691
ABCG1	NA	NA	0.132716	NA
ABCG2	NA	NA	0.15061	-0.560995
ABCG4	NA	NA	0.214727	NA
ABCG5	NA	NA	-0.0127875	NA
ABCG8	NA	NA	-0.0085687	NA
ABHD1	NA	NA	0.226403	NA
ABHD10	0.149	0.200501	-0.0413427	-0.110966
ABHD11	-0.023	NA	0.176296	-0.127868
ABHD12	0.151	0.0778877	0.101915	-0.145444
ABHD12B	NA	NA	-0.0894928	NA
ABHD13	0.028	-0.304687	-0.0439984	-0.221413
ABHD14A	0.062	0.225139	NA	NA
ABHD14A-ACY1	NA	NA	-0.0665334	NA
ABHD14B	-0.007	0.0741468	-0.034642	0.284344
ABHD15	NA	-0.16721	0.043422	0.039943
ABHD16A	NA	NA	NA	0.206283
ABHD16B	NA	NA	0.117153	NA
ABHD17A	NA	0.185881	0.062874	-0.229321
ABHD17B	NA	-0.125194	-0.0525225	-0.730938
ABHD17C	NA	0.0418022	NA	-0.118154
ABHD18	NA	-0.379983	0.0452512	NA
ABHD2	-0.484	-0.110355	0.275728	-0.402019
ABHD3	0.011	-0.160799	0.115963	-0.144197
ABHD4	-0.047	-0.171977	-0.0384231	-1.90762
ABHD5	0.072	NA	0.148909	-1.04693
ABHD6	NA	-0.0986079	0.123155	0.203773
ABHD7	-0.041	NA	NA	NA
ABHD8	NA	0.395725	0.0644955	0.39207
ABI1	0.168	-0.380796	0.0216534	-0.613292
ABI2	-0.081	0.0863711	0.0587828	0.130115
ABI3	NA	NA	-0.0208487	NA
ABI3BP	0.051	NA	0.0721996	NA
ABL1	0.119	NA	0.0181026	-0.599446
ABL2	NA	-0.494282	-0.00090597	-0.479335
ABLIM1	0.046	-0.325051	0.132404	-0.286538
ABLIM2	NA	NA	-0.019655	NA
ABLIM3	0.025	NA	0.134331	NA
ABO	NA	NA	-0.0761343	NA
ABR	-0.346	0.217262	0.0480071	0.119465
ABRA	NA	NA	-0.0494957	NA
ABRACL	NA	-0.231224	-0.0419273	-0.573177
ABT1	NA	0.128256	-0.206915	-0.871842
ABTB1	NA	NA	0.0345539	NA
ABTB2	0.085	NA	-0.0152405	0.29376
AC004381.6	NA	0.0884334	0.0309263	NA
AC013461.1	NA	-0.298986	0.0772315	NA
ACAA1	0.001	0.142261	0.0138889	-0.489546
ACAA2	-0.066	0.151527	-0.039887	-1.83547
ACACA	NA	NA	NA	-0.146312
ACACB	NA	NA	0.0659666	0.0779701
ACAD10	NA	NA	0.034771	-0.360279
ACAD11	0.046	NA	-0.0565494	-0.965007
ACAD8	-0.01	0.0459659	0.0385769	-0.245358
ACAD9	0.022	0.33973	0.118902	-0.651211
ACADL	NA	NA	0.333732	-0.599091
ACADM	-0.145	-0.000143557	-0.0778802	-0.278493
ACADS	0.094	0.252953	0.0201598	-0.603216
ACADSB	NA	-0.456341	0.179298	-0.975488
ACADVL	0.014	0.223098	0.109519	-1.20621
ACAN	NA	NA	-0.0457873	NA
ACAP1	0.225	NA	-0.0337042	NA
ACAP2	-0.126	NA	0.130503	-0.438541
ACAP3	NA	0.427654	0.0190903	-0.0676487
ACAT1	-0.071	NA	-0.0110923	-0.035616
ACAT2	0.212	-0.0411639	0.136037	-0.284594
ACBD3	0.182	-0.14979	-0.0196533	-0.489857
ACBD4	NA	NA	0.121036	-0.338797
ACBD5	NA	-0.434902	0.0470812	-0.218565
ACBD6	-0.066	NA	NA	-0.276908
ACBD7	NA	NA	0.0106223	-0.620722
ACCN2	0.123	NA	NA	NA
ACCN3	NA	NA	NA	NA
ACCN4	0.041	NA	NA	NA
ACCS	NA	NA	0.0395205	NA
ACD	0.087	0.170925	0.0852196	0.0201356
ACE	0.037	NA	0.260172	NA
ACE2	NA	NA	-0.0844731	NA
ACER1	NA	NA	-0.0805148	NA
ACER2	NA	NA	0.0085365	NA
ACER3	0.144	-0.335084	0.214723	-0.662727
ACHE	NA	NA	0.0145023	NA
ACIN1	0.03	-0.0285733	0.000905221	-0.369656
ACKR1	NA	NA	-0.169769	NA
ACKR2	NA	NA	-0.0401911	NA
ACKR3	NA	NA	0.0218106	NA
ACKR4	NA	NA	-0.23636	NA
ACLY	0.088	0.00645151	0.122132	-0.184871
ACMSD	NA	NA	-0.00468931	NA
ACN9	0.121	NA	NA	NA
ACO1	0.005	-0.0485012	0.102296	-0.288216
ACO2	0.005	-0.217251	-0.0162398	-0.0763363
ACOT1	NA	NA	NA	-0.205409
ACOT11	-0.03	NA	0.0356883	NA
ACOT12	NA	NA	0.0832206	NA
ACOT13	NA	0.0759774	-0.103146	-0.0417116
ACOT2	NA	NA	-0.00478871	0.178304
ACOT4	NA	NA	0.0062968	NA
ACOT7	0.051	0.236426	-0.0245272	-0.0628152
ACOT8	-0.018	0.253708	-0.123138	-0.517234
ACOT9	0.024	0.0965496	-0.00559019	-0.481828
ACOX1	-0.099	-0.0895317	0.276186	-0.287169
ACOX2	0.331	NA	0.133868	NA
ACOX3	NA	NA	0.166872	NA
ACOXL	NA	NA	0.240854	NA
ACP1	NA	0.0524804	-0.113053	-0.588511
ACP2	-0.059	0.199541	0.275614	-0.356467
ACP5	NA	NA	-0.324326	NA
ACP6	0.003	0.235068	0.0865957	-1.19154
ACPL2	0.176	NA	NA	NA
ACPP	NA	NA	0.379794	NA
ACPT	-0.033	NA	-0.106647	NA
ACR	NA	NA	-0.0854457	NA
ACRBP	NA	NA	0.0114202	NA
ACRC	NA	-0.530649	0.2712	NA
ACRV1	NA	NA	-0.0323693	NA
ACSBG1	-0.084	NA	-0.134428	NA
ACSBG2	NA	NA	-0.0842761	NA
ACSF2	NA	0.216698	-0.0512861	-0.299622
ACSF3	NA	NA	-0.0450803	-0.751012
ACSL1	-0.186	-0.243505	0.151266	-0.288256
ACSL3	0.151	-0.170748	-0.00510306	-0.179321
ACSL4	0.335	NA	0.121691	-0.0127177
ACSL5	NA	NA	-0.0685672	NA
ACSL6	NA	NA	0.00875483	NA
ACSM1	NA	NA	-0.0513406	NA
ACSM2B	NA	NA	-0.18823	NA
ACSM3	NA	NA	0.251982	NA
ACSM5	NA	NA	-0.0576332	NA
ACSM6	NA	NA	-0.0963631	NA
ACSS1	NA	NA	-0.0545979	-1.02372
ACSS2	0.013	0.367008	0.0509194	-0.353495
ACSS3	NA	NA	0.0513757	NA
ACTA1	-0.165	NA	0.0619812	-0.211287
ACTA2	-0.434	NA	-0.567582	-0.747658
ACTB	NA	0.0289953	0.0262135	0.00198039
ACTC1	NA	NA	-0.0470349	NA
ACTG1	NA	0.0671445	0.0513925	0.11277
ACTG1P20	NA	NA	NA	0.0798701
ACTG1P4	NA	NA	NA	0.237391
ACTG2	NA	NA	0.0758978	NA
ACTL6A	0.048	-0.161623	-0.059136	-0.139651
ACTL6B	NA	NA	-0.0561851	NA
ACTL7B	NA	NA	-0.188003	NA
ACTL8	NA	NA	-0.0609509	NA
ACTL9	NA	NA	-0.314577	NA
ACTN1	-0.142	0.0782781	0.00252094	-0.0915611
ACTN2	NA	NA	0.133516	-0.494987
ACTN3	NA	NA	-0.0629324	NA
ACTN4	-0.005	0.211114	0.0358837	-0.548966
ACTR10	0.042	0.0292581	0.0517812	-0.399954
ACTR1A	-0.141	0.348794	-0.00013474	-0.436842
ACTR1B	-0.029	0.191479	0.0737261	-0.15173
ACTR2	-0.549	-0.184492	0.0019675	-0.119215
ACTR3	0.161	-0.166935	-0.0414558	-0.45746
ACTR3B	0.264	0.207493	0.0001765	0.141467
ACTR3C	NA	NA	-0.0783801	NA
ACTR5	-0.157	0.0070088	-0.0938891	-0.167401
ACTR6	0.094	-0.0867771	0.0239043	-0.110391
ACTR8	NA	0.141007	0.0322154	-0.404212
ACTRT2	NA	NA	0.157615	NA
ACTRT3	NA	NA	0.0610554	NA
ACVR1	-0.148	-0.494262	0.0852289	-0.56702
ACVR1B	NA	NA	0.0483097	0.039538
ACVR1B	0.213	NA	0.0483097	0.039538
ACVR2A	0.163	-0.261867	-0.018664	-0.112713
ACVR2B	NA	-0.00215253	0.00775066	0.380379
ACVRL1	NA	NA	0.176727	NA
ACY1	-0.081	NA	NA	-0.860953
ACY3	NA	NA	-0.155437	NA
ACYP1	-0.064	0.215305	0.073973	0.112845
ACYP2	0.18	0.146695	-0.234589	-0.463993
ADA	NA	0.176783	-0.0249974	-0.246814
ADAD1	NA	NA	-0.45907	NA
ADAD2	NA	0.22217	-0.0411562	NA
ADAL	NA	NA	0.0379719	-0.0946101
ADAM10	NA	-0.126246	0.189733	-0.595628
ADAM11	NA	NA	0.130191	-0.00759809
ADAM12	0.091	NA	-0.0265527	-0.161134
ADAM15	0.096	0.291262	0.0808555	-0.178966
ADAM17	0.292	-0.218674	0.132607	-0.390366
ADAM18	NA	NA	0.00407503	NA
ADAM19	0.285	NA	0.303087	-0.512047
ADAM19	0.063	NA	0.303087	-0.512047
ADAM1A	NA	NA	NA	-0.762433
ADAM2	NA	NA	-0.13203	NA
ADAM20	NA	NA	-0.131141	NA
ADAM21	NA	NA	0.24321	NA
ADAM22	NA	NA	0.0652614	-0.208229
ADAM23	NA	0.0035531	0.0771759	-0.132807
ADAM28	NA	NA	-0.0287437	NA
ADAM29	NA	NA	-0.0089592	NA
ADAM30	NA	NA	-0.0139624	NA
ADAM32	NA	NA	0.0309976	NA
ADAM33	NA	NA	-0.107522	NA
ADAM7	NA	NA	-0.0177759	NA
ADAM8	NA	NA	-0.0400053	NA
ADAM9	0.03	NA	0.0108148	-0.193112
ADAMDEC1	NA	NA	-0.0524445	NA
ADAMTS1	NA	-0.461792	0.0758733	-0.596354
ADAMTS10	NA	NA	0.00900515	NA
ADAMTS12	NA	NA	-0.0812028	NA
ADAMTS13	NA	NA	-0.0176832	-1.05409
ADAMTS14	0.034	NA	-0.0257775	NA
ADAMTS15	NA	NA	-0.0748183	-0.13357
ADAMTS16	NA	NA	0.0401325	-0.938308
ADAMTS17	NA	NA	-0.0366857	-0.248136
ADAMTS18	NA	NA	-0.11951	NA
ADAMTS19	NA	NA	0.0175464	0.219672
ADAMTS2	NA	NA	0.0727036	0.249308
ADAMTS20	NA	NA	0.09899	-0.700425
ADAMTS3	NA	-0.0489722	-0.121815	-0.300187
ADAMTS4	NA	NA	0.00102091	NA
ADAMTS5	NA	NA	-0.0487176	0.0678645
ADAMTS6	NA	NA	-0.0421555	NA
ADAMTS7	NA	NA	0.0354121	NA
ADAMTS8	NA	NA	0.0455618	NA
ADAMTS9	NA	NA	0.0273226	-0.827418
ADAMTSL1	NA	NA	-0.095151	NA
ADAMTSL2	-0.004	NA	NA	NA
ADAMTSL3	NA	NA	0.0326478	NA
ADAMTSL4	NA	NA	-0.0481063	NA
ADAMTSL5	NA	NA	-0.0819353	NA
ADAP1	0.005	0.391748	NA	0.232658
ADAP2	0.04	0.275989	0.0714393	0.223732
ADAR	0.005	-0.00618021	0.045101	-0.222233
ADARB1	0.222	NA	0.0522447	0.188845
ADARB2	NA	NA	-0.0672791	NA
ADAT1	NA	-0.403135	0.126041	-0.738165
ADAT2	NA	-0.529905	-0.0167446	-0.612893
ADAT3	NA	NA	-0.0553974	NA
ADCK1	NA	0.616533	0.116469	-0.129542
ADCK2	-0.215	0.210662	0.0468626	-0.317864
ADCK3	NA	0.451141	0.00576585	NA
ADCK4	NA	NA	0.0148568	NA
ADCK5	NA	NA	0.00650499	NA
ADCY1	NA	NA	0.168054	0.317012
ADCY10	NA	NA	-0.0213496	NA
ADCY2	NA	NA	0.0399519	NA
ADCY3	0.012	0.212642	0.396225	-0.785536
ADCY4	NA	NA	-0.0742801	NA
ADCY5	NA	NA	0.0105938	NA
ADCY6	NA	-0.0576122	0.152334	-0.819393
ADCY7	0.09	NA	0.0403228	-0.445948
ADCY8	NA	NA	-0.172032	NA
ADCY9	NA	NA	0.258408	-0.694479
ADCYAP1	NA	NA	-0.124692	NA
ADCYAP1R1	NA	NA	0.0315887	NA
ADD1	0.058	0.0713389	0.108116	-0.125247
ADD2	NA	NA	-0.0401473	-0.363018
ADD3	0.03	-0.22941	-0.0877662	-0.210886
ADFP	-0.085	NA	NA	NA
ADGRA1	NA	NA	-0.0848949	NA
ADGRA2	NA	NA	0.000131156	-0.181071
ADGRA3	NA	-0.154371	-0.0779843	-0.350236
ADGRB1	NA	NA	0.0498791	NA
ADGRB2	NA	0.423878	0.022241	NA
ADGRB3	NA	NA	-0.0278234	NA
ADGRD1	NA	NA	-0.0412459	NA
ADGRD2	NA	NA	-0.0362352	NA
ADGRE1	NA	NA	-0.0335345	NA
ADGRE2	NA	NA	0.0349205	NA
ADGRE3	NA	NA	-0.120025	NA
ADGRE5	NA	0.479667	0.260561	-0.123897
ADGRF1	NA	NA	0.0783146	NA
ADGRF2	NA	NA	0.028574	NA
ADGRF3	NA	NA	-0.0645241	NA
ADGRF4	NA	NA	0.0108199	NA
ADGRF5	NA	NA	-0.0550386	NA
ADGRG1	NA	NA	-0.0802515	NA
ADGRG2	NA	NA	0.0732022	-0.658559
ADGRG3	NA	NA	-0.106444	NA
ADGRG4	NA	NA	-0.0761281	NA
ADGRG5	NA	NA	-0.0824969	NA
ADGRG6	NA	NA	0.148367	-0.703111
ADGRG7	NA	NA	-0.000540933	NA
ADGRL1	NA	0.496552	0.0425839	0.153985
ADGRL2	NA	-0.142578	0.0203806	-0.113188
ADGRL3	NA	NA	-0.0122881	0.0496869
ADGRL4	NA	NA	0.131668	NA
ADGRV1	NA	NA	-0.0365314	-0.0970774
ADH1A	NA	NA	-0.0464562	NA
ADH1B	NA	NA	-0.213911	NA
ADH1C	NA	NA	0.041402	NA
ADH4	NA	NA	0.0241878	NA
ADH5	0.105	0.000810888	-0.0448728	-0.427527
ADH6	NA	NA	-0.0509471	NA
ADH7	NA	NA	-0.00137554	NA
ADHFE1	NA	NA	-0.108337	NA
ADI1	-0.024	0.0470859	0.114177	-0.796515
ADIG	NA	NA	0.0511006	NA
ADIPOQ	NA	NA	0.00370235	NA
ADIPOR1	NA	0.0963208	0.060078	-0.627014
ADIPOR2	0.205	0.139751	0.0438906	-0.643563
ADIRF	NA	NA	0.0538221	NA
ADK	0.048	-0.0255797	-0.177187	-0.542069
ADM	-0.158	0.138066	0.215756	-0.819559
ADM2	NA	NA	-0.00836	NA
ADNP	-0.044	-0.108604	0.104003	-0.0652509
ADNP2	-0.252	-0.169357	0.0331854	-0.715162
ADO	NA	-0.427796	-0.107934	-0.569902
ADORA1	0.099	NA	-0.0107443	NA
ADORA2A	NA	NA	NA	0.232502
ADORA2B	0.032	0.131819	-0.0297467	-0.300484
ADPGK	0.079	0.154766	0.0461608	-0.798845
ADPRH	NA	NA	-0.12045	NA
ADPRHL1	NA	NA	0.190767	NA
ADPRHL2	-0.228	-0.0863964	0.0172011	-0.541285
ADPRM	NA	0.00059393	-0.0596384	-0.207163
ADRA1A	NA	NA	-0.00799351	NA
ADRA1B	NA	NA	0.0598039	NA
ADRA1D	NA	NA	0.0241768	NA
ADRA2A	NA	NA	-0.127082	NA
ADRA2C	NA	-0.0372894	-0.0673267	-0.423168
ADRB1	NA	NA	-0.0852146	NA
ADRB2	NA	NA	0.0192551	NA
ADRB3	NA	NA	0.0473286	NA
ADRBK1	-0.322	NA	-0.0174567	NA
ADRBK2	-0.017	NA	-0.00106883	NA
ADRM1	0.06	0.192603	-0.0208432	-0.213658
ADSL	0.192	0.0842201	-0.179662	-0.326254
ADSS	0.039	-0.447668	-0.0532713	-0.123673
ADSSL1	NA	NA	-0.0154124	NA
ADTRP	NA	NA	-0.053148	NA
AEBP1	NA	NA	0.0180856	NA
AEBP2	-0.246	-0.186672	0.0137887	-0.302015
AEN	-0.159	-0.00303509	0.00689645	-0.733769
AES	-0.07	0.116487	-0.109239	0.073117
AFAP1	NA	NA	0.145294	0.326264
AFAP1L1	NA	NA	-0.0547336	-0.456472
AFAP1L2	NA	NA	0.00767813	NA
AFDN	NA	NA	NA	-0.27952
AFF1	0.007	NA	0.0847004	-0.623134
AFF2	NA	NA	0.0271717	-0.0867998
AFF3	NA	NA	0.0223811	-0.0958523
AFF4	NA	NA	0.122058	-0.772733
AFG3L1P	NA	NA	NA	-0.163706
AFG3L2	0.06	-0.0620463	0.0872591	-0.138447
AFM	NA	NA	0.0331295	NA
AFMID	NA	NA	NA	0.0146238
AFP	NA	NA	0.0162798	-2.00738
AFTPH	NA	-0.0493824	0.0794056	-0.211057
AGA	NA	0.14474	0.19203	-0.261802
AGAP1	-0.065	-0.20236	-0.00350183	-0.0177732
AGAP2	NA	NA	0.0703472	NA
AGAP3	-0.136	0.363038	0.0835304	-0.11625
AGAP6	NA	NA	NA	-0.699331
AGBL1	NA	NA	-0.0243649	NA
AGBL2	NA	NA	-0.181118	NA
AGBL3	NA	NA	0.427756	NA
AGBL4	NA	NA	-0.0784382	NA
AGBL5	NA	0.129199	-0.137533	-0.255496
AGFG1	NA	-0.404106	0.0158012	-0.679121
AGFG2	0.005	NA	0.139978	-0.928608
AGGF1	0.031	-0.199763	0.034045	-0.239356
AGK	NA	-0.670577	-0.0569547	-0.415058
AGL	0.073	0.0791932	0.148936	-0.357127
AGMAT	NA	NA	-0.0609632	NA
AGMO	NA	NA	0.0400955	NA
AGO1	NA	-0.261113	0.0928021	-0.45651
AGO2	NA	0.0560839	0.115928	-0.403555
AGO3	NA	0.0421792	0.0449702	-0.556478
AGO4	NA	NA	0.339841	-0.05791
AGPAT1	NA	0.222353	NA	-0.0853703
AGPAT2	NA	0.292286	0.0578285	0.191018
AGPAT3	NA	-0.142639	0.109243	0.0395366
AGPAT4	-0.358	NA	0.0646326	-0.457317
AGPAT5	0.434	0.0956295	0.0665346	-0.871341
AGPAT6	-0.854	NA	NA	NA
AGPAT9	0.286	NA	NA	NA
AGPS	0.077	-0.163263	0.0646601	-0.543816
AGR2	NA	NA	0.0343705	NA
AGR3	NA	NA	0.0451545	NA
AGRN	NA	NA	NA	-0.327256
AGRP	NA	NA	-0.0122448	NA
AGT	NA	NA	0.0479549	NA
AGTPBP1	0.054	-0.0903831	0.0274374	-0.282381
AGTR1	NA	NA	0.19238	NA
AGTR2	NA	NA	0.238414	NA
AGTRAP	0.234	0.381997	0.0166151	-0.780298
AGXT	0.173	NA	-0.0499083	NA
AGXT2	NA	NA	-0.0545848	NA
AGXT2L2	0.032	NA	NA	NA
AHCTF1	NA	0.185266	0.0549757	-0.589419
AHCY	0.035	0.0676213	-0.113398	-0.227664
AHCYL1	0.019	-0.0956217	0.150441	-0.423422
AHCYL2	NA	-0.237229	-0.00724237	-0.665478
AHDC1	0.032	NA	0.0330741	0.334391
AHI1	NA	NA	-0.0375629	-0.834926
AHNAK	0.467	NA	-0.0030198	-0.259114
AHNAK2	NA	NA	0.150176	0.537609
AHR	NA	-0.0651269	0.0730494	-1.44346
AHRR	NA	0.204656	0.0956217	-1.12186
AHSA1	0.091	0.152741	0.00378373	-0.174988
AHSA2	-0.041	NA	0.30545	-0.468352
AHSG	NA	NA	-0.00583723	NA
AHSP	NA	NA	-0.126103	NA
AICDA	NA	NA	0.0395073	NA
AIDA	0.109	-0.0522774	NA	-0.658213
AIF1L	0.108	0.00825554	-0.0883325	-0.93843
AIFM1	NA	0.00281124	-0.0116028	-0.137539
AIFM2	-0.057	0.204525	0.0973948	-0.750376
AIFM3	NA	NA	-0.142567	NA
AIG1	0.101	NA	-0.0512617	-0.636297
AIM1	-0.107	NA	NA	0.19817
AIM1L	-0.456	NA	-0.0106768	NA
AIM2	NA	NA	-0.161319	NA
AIMP1	NA	0.022984	-0.0413851	-0.57789
AIMP2	NA	0.0856214	-0.0552591	-1.04312
AIP	0.194	0.298067	-0.113272	0.105679
AIPL1	NA	NA	0.0153143	NA
AIRE	-0.031	NA	-0.0925267	NA
AJAP1	NA	NA	-0.0521225	NA
AJUBA	NA	0.0237	0.0823383	-0.426623
AK1	0.25	0.153806	-0.0128225	-0.270763
AK2	-0.057	0.12171	-0.0827696	-1.02098
AK2	-0.039	0.12171	-0.0827696	-1.02098
AK3	NA	-0.206884	-0.0143828	-0.91419
AK3L1	0.073	NA	NA	NA
AK4	NA	NA	0.161223	-0.134663
AK5	NA	NA	0.0160399	NA
AK6	NA	-0.0269871	-0.0672591	-0.293655
AK7	NA	NA	-0.228191	NA
AK8	NA	NA	-0.0982887	NA
AK9	NA	NA	0.108041	-0.670268
AKAP1	0.12	0.0265306	0.0295723	-0.0197307
AKAP10	0.027	NA	0.113501	0.0636232
AKAP11	0.191	-0.0600863	0.159916	-0.140104
AKAP12	NA	-0.0913097	0.0641625	-0.111787
AKAP13	0.043	NA	0.0527555	-0.639333
AKAP14	NA	NA	-0.052106	NA
AKAP17A	NA	0.0510993	0.0590704	-0.603583
AKAP2	NA	NA	-0.229718	-0.475496
AKAP3	NA	NA	-0.0079542	NA
AKAP4	NA	NA	-0.138844	NA
AKAP5	NA	NA	0.0252456	-0.0878084
AKAP6	NA	NA	0.0289022	NA
AKAP7	NA	NA	0.0815052	-0.0997294
AKAP8	0.024	0.0471808	0.0732681	-0.249496
AKAP8L	-0.193	NA	0.0527201	-0.857898
AKAP9	-0.15	NA	0.0320975	-0.109955
AKIP1	NA	0.0783706	0.0636429	-0.82249
AKIRIN1	NA	-0.00477284	-0.0402743	-0.131378
AKIRIN2	-0.231	0.0248305	-0.139369	-0.965298
AKNA	0.032	NA	0.0646119	-1.55566
AKNAD1	NA	NA	-0.0838842	NA
AKR1A1	0.054	0.146598	-0.0179117	-0.385269
AKR1B1	-0.078	0.0517617	-0.0238357	-0.566836
AKR1B10	NA	NA	0.0761085	NA
AKR1C1	NA	NA	0.170041	NA
AKR1C2	NA	NA	-0.00281467	NA
AKR1C3	NA	NA	-0.12507	NA
AKR1C4	NA	NA	-0.355862	NA
AKR1D1	NA	NA	0.0287159	NA
AKR1E2	NA	NA	-0.0307238	NA
AKR7A2	-0.059	-0.162689	-0.146119	-0.276143
AKR7A3	NA	-0.107449	0.163145	NA
AKR7L	NA	NA	0.0271554	NA
AKT1	-0.042	0.303792	0.0177141	0.0203172
AKT1S1	NA	0.0648549	-0.0221126	-1.50593
AKT2	NA	0.00950732	-0.012847	-0.642713
AKT3	-0.02	NA	-0.0614583	-0.0121886
AKTIP	0.069	0.275704	0.441084	-0.159491
AL021546.6	NA	NA	0.00937735	NA
ALAD	NA	-0.0102049	0.0710661	-0.0380065
ALAS1	-0.148	0.00871084	0.130569	-0.40023
ALAS2	NA	NA	-0.160291	NA
ALB	NA	NA	-0.127106	NA
ALCAM	-0.008	-0.133371	0.0933569	-0.379143
ALDH16A1	0.026	0.317894	0.004996	-0.252604
ALDH18A1	0.047	-0.0412773	-0.0624665	-0.529681
ALDH1A1	NA	NA	0.046518	NA
ALDH1A2	NA	-0.467827	-0.137584	-0.157079
ALDH1A3	0.337	NA	0.145188	0.595389
ALDH1B1	NA	-0.129218	0.0167419	-0.0561331
ALDH1L1	0.051	NA	0.113425	NA
ALDH2	-0.144	-0.015004	-0.0542694	-0.217764
ALDH3A1	NA	NA	-0.0532288	NA
ALDH3A2	-0.012	-0.0736638	0.0741719	-0.390414
ALDH3B1	NA	NA	-0.0330758	NA
ALDH3B2	NA	NA	-0.0586359	NA
ALDH4A1	-0.006	NA	0.0328719	-0.217634
ALDH5A1	0.551	-0.0593884	0.0126568	-0.457355
ALDH6A1	NA	-0.140763	0.207801	-0.329719
ALDH7A1	-0.082	-0.0226882	0.041382	-0.0787553
ALDH8A1	NA	NA	-0.0554897	NA
ALDH9A1	0.279	0.0253999	-0.0124894	-1.24774
ALDOA	NA	0.0834154	-0.0171046	-0.0621481
ALDOB	NA	NA	-0.131467	NA
ALDOC	0.202	-0.350645	0.162762	NA
ALG1	0.374	-0.097019	-0.000400978	-0.43446
ALG10	NA	NA	NA	-0.302639
ALG10B	NA	-0.499492	NA	-0.0932611
ALG11	NA	NA	NA	-0.717124
ALG12	0.113	0.224161	0.0239202	-0.445861
ALG13	0.118	-0.0391804	0.139315	-0.602705
ALG14	0.098	-0.0137466	0.01414	-0.374218
ALG2	0.051	-0.0954985	0.0572268	-0.993598
ALG3	0.034	0.131581	0.00478427	-0.650333
ALG5	0.077	0.0507568	0.0630618	-0.727757
ALG6	0.116	0.111084	0.121873	-0.241889
ALG8	0.194	0.0530835	0.0759161	-0.290375
ALG9	-0.034	-0.27392	0.121004	-0.200357
ALK	NA	NA	0.00341615	NA
ALKBH1	0.154	0.0294846	0.0390067	-0.754483
ALKBH2	NA	0.0927403	0.149121	-0.363883
ALKBH3	-0.055	0.128874	-0.0252726	-0.559555
ALKBH4	-0.012	0.286091	0.0207835	-0.0434519
ALKBH5	-0.003	0.0397457	0.0293945	-0.0950444
ALKBH6	0.092	0.131763	0.076381	0.0397659
ALKBH7	0.344	0.205935	-0.0979121	0.521858
ALKBH8	-0.142	-0.437274	0.0384459	-0.850907
ALLC	NA	NA	-0.143794	NA
ALMS1	0.013	0.0785191	0.0274413	0.00847192
ALOX12B	NA	NA	-0.0123725	NA
ALOX12P2	NA	NA	NA	-0.478906
ALOX15	NA	NA	-0.0153893	NA
ALOX15B	NA	NA	-0.125094	NA
ALOX5	NA	NA	0.175816	NA
ALOX5AP	NA	NA	-0.0285518	NA
ALOXE3	NA	NA	0.0192027	NA
ALPI	NA	NA	-0.0183598	NA
ALPK1	NA	NA	0.139056	-0.208622
ALPK2	NA	NA	0.168325	NA
ALPK3	0	NA	-0.0522372	NA
ALPL	NA	NA	0.0116515	NA
ALPP	NA	NA	0.0956502	-0.546449
ALPPL2	0.009	NA	-0.0306811	NA
ALS2	0.059	-0.0557308	0.0339216	-0.202917
ALS2CL	NA	NA	0.0644415	NA
ALS2CR11	NA	NA	0.0652106	NA
ALS2CR12	NA	NA	0.18512	NA
ALX1	NA	-0.155698	-0.166412	0.40708
ALX3	NA	NA	0.0285086	NA
ALX4	NA	NA	-0.106362	0.628211
ALYREF	NA	0.0370088	-0.254694	-0.277969
AMACR	NA	NA	0.0019532	0.023044
AMBN	NA	NA	0.306189	NA
AMBP	NA	NA	-0.118849	NA
AMBRA1	0.023	NA	-0.0579004	-0.252842
AMD1	-0.003	0.0088687	-0.23279	-0.38526
AMDHD1	0.265	NA	0.155789	NA
AMDHD2	0.031	NA	0.0771842	-0.356569
AMELX	NA	NA	0.125407	NA
AMELY	NA	NA	-0.150068	NA
AMER1	NA	NA	0.0254371	-0.37213
AMER2	NA	NA	0.0449501	NA
AMER3	NA	NA	0.180764	NA
AMFR	-0.375	0.189949	0.131536	-0.468845
AMH	0.041	-0.00684729	-0.0568089	-0.724517
AMHR2	NA	NA	0.0484268	NA
AMICA1	NA	NA	-0.0490516	NA
AMIGO1	NA	NA	-0.0206173	NA
AMIGO2	NA	-0.177586	0.0452786	-1.65713
AMIGO3	NA	NA	NA	-0.368197
AMMECR1	NA	-0.568908	-0.0492018	-1.58975
AMMECR1L	-0.72	-0.0504964	0.0346908	-0.584537
AMN	0.021	NA	-0.0628547	NA
AMN1	NA	NA	0.0310576	0.307441
AMOT	NA	NA	-0.123682	-0.198662
AMOTL1	NA	-0.0568403	0.0697478	-0.859913
AMOTL2	-0.366	-0.360114	-0.00125876	-0.158114
AMPD1	NA	NA	-0.204248	NA
AMPD2	-0.112	0.00454091	0.0911885	-0.291834
AMPD3	-0.173	NA	0.0168055	NA
AMPH	NA	-0.0366507	0.175139	0.110621
AMT	NA	NA	-0.0074686	NA
AMTN	NA	NA	0.0366777	NA
AMY2B	NA	NA	-0.0220557	NA
AMZ2	NA	0.121305	0.0157488	-0.33437
AMZ2P1	NA	NA	NA	0.0169684
ANAPC1	NA	NA	-0.0340504	-0.432492
ANAPC10	0.174	0.0819678	-0.291624	-0.377659
ANAPC11	NA	0.0482324	-0.0370601	-0.0929067
ANAPC13	-0.121	0.0771223	0.140931	-0.187505
ANAPC15	NA	0.262409	-0.152811	0.096
ANAPC16	NA	-1.18111e-05	0.0732188	-0.160038
ANAPC1P1	NA	NA	NA	-0.450412
ANAPC2	0.094	0.328443	0.0207742	-0.113514
ANAPC4	-0.017	-0.0993028	-0.0575384	-0.0744632
ANAPC5	NA	-0.104098	0.0839473	0.0185757
ANAPC7	-0.338	0.0762251	NA	-0.445933
ANG	0.263	NA	-0.0111626	NA
ANGEL1	-0.254	-0.0228639	0.145029	-0.732998
ANGEL2	NA	-0.0696515	0.0577133	-0.170084
ANGPT1	NA	NA	0.0252185	NA
ANGPT2	NA	NA	-0.0562633	NA
ANGPT4	0.077	NA	-0.027015	NA
ANGPTL1	NA	NA	0.148257	NA
ANGPTL2	NA	NA	-0.116949	NA
ANGPTL3	NA	NA	0.144866	NA
ANGPTL4	NA	NA	-0.0305804	NA
ANGPTL5	NA	NA	-0.111388	NA
ANGPTL6	NA	NA	-0.0787194	NA
ANGPTL7	NA	NA	-0.170018	NA
ANK1	NA	NA	-0.0258	NA
ANK2	NA	NA	0.169812	-0.202378
ANK3	NA	NA	0.164895	-0.378469
ANKDD1A	NA	NA	-0.158453	NA
ANKEF1	NA	NA	0.226083	-0.661387
ANKFN1	-0.044	NA	-0.116239	NA
ANKFY1	-0.767	NA	0.106857	-0.506718
ANKH	NA	0.0291745	0.0207032	-0.417485
ANKHD1	-0.086	NA	0.0394358	-0.348187
ANKHD1-EIF4EBP3	0.094	NA	NA	-0.408016
ANKIB1	0.088	0.00732846	NA	-0.278303
ANKK1	NA	NA	-0.0586953	NA
ANKLE1	NA	NA	-0.0606085	NA
ANKLE2	NA	0.179625	NA	-0.214085
ANKMY1	NA	NA	0.00796979	-0.574018
ANKMY2	-0.282	0.317544	0.0709835	-0.34104
ANKRA2	-0.26	-0.0584175	0.110587	-0.0506716
ANKRD1	NA	NA	0.130541	NA
ANKRD10	-0.075	0.0980701	0.0842331	-0.608307
ANKRD11	0.013	-0.22814	0.0745651	-0.306525
ANKRD12	NA	NA	0.0982366	0.110408
ANKRD13A	NA	0.0745726	0.0925291	-0.261932
ANKRD13B	0.577	0.595607	-0.0271112	-0.665165
ANKRD13C	0.181	-0.490716	0.141862	-0.314268
ANKRD13D	NA	NA	0.0817924	0.352862
ANKRD16	NA	0.522074	0.108244	-0.0911566
ANKRD17	0.019	-0.0765693	0.0387517	-0.358788
ANKRD18A	NA	NA	0.168727	-0.16368
ANKRD2	NA	NA	-0.0150392	NA
ANKRD22	NA	NA	0.0032942	NA
ANKRD23	-0.303	NA	0.058179	-0.460936
ANKRD26	NA	NA	0.128805	-0.130187
ANKRD27	0.054	-0.3363	-0.160089	-0.710287
ANKRD28	NA	-0.0137975	0.0631045	-0.480647
ANKRD29	NA	NA	0.168176	NA
ANKRD30A	NA	NA	-0.0165697	NA
ANKRD30BL	NA	NA	NA	0.506331
ANKRD32	-0.129	NA	NA	NA
ANKRD33	0.003	NA	0.0289332	NA
ANKRD33B	NA	NA	NA	-0.153449
ANKRD34B	NA	NA	0.252109	NA
ANKRD35	NA	NA	-0.0581687	NA
ANKRD36	NA	NA	-0.083672	-0.196049
ANKRD36B	NA	NA	-0.0521928	-0.0118699
ANKRD36BP2	NA	NA	NA	-1.03045
ANKRD37	0.136	NA	-0.116632	NA
ANKRD39	-0.127	0.229848	0.103651	0.176313
ANKRD40	-0.388	-0.123718	0.0193629	-0.728156
ANKRD42	NA	NA	-0.157464	-1.22149
ANKRD44	NA	NA	0.266086	-0.808219
ANKRD45	NA	NA	-0.0920903	NA
ANKRD46	0.545	0.118877	-0.0148196	0.328268
ANKRD49	NA	-0.0139259	-0.0882504	-0.351102
ANKRD5	0.076	NA	NA	NA
ANKRD50	NA	-0.0127935	0.0656817	-0.080393
ANKRD52	NA	0.457752	0.267746	0.261439
ANKRD53	NA	NA	0.0336499	NA
ANKRD54	NA	0.325135	-0.0691432	-0.109015
ANKRD55	NA	NA	-0.163242	NA
ANKRD6	0.253	-0.225542	0.00810422	-0.544756
ANKRD60	NA	NA	-0.0313683	NA
ANKRD7	NA	NA	-0.0302314	NA
ANKRD9	-0.036	0.0972409	0.0488911	-0.08966
ANKS1A	-0.166	-0.502955	-0.00885055	-0.229482
ANKS1B	NA	NA	-0.0945005	NA
ANKS3	0.032	NA	0.00380068	-0.247339
ANKS4B	NA	NA	-0.125953	NA
ANKS6	NA	NA	0.13408	-0.63777
ANKZF1	-0.268	0.192072	0.100855	-0.158539
ANLN	NA	0.164415	0.0435675	-0.00232362
ANO1	0.172	NA	0.056382	NA
ANO10	-0.008	0.0272982	0.195765	-0.91653
ANO2	NA	NA	0.0627847	NA
ANO3	NA	NA	-0.0206464	NA
ANO4	NA	NA	0.126249	NA
ANO5	NA	-0.223774	0.126436	-0.545503
ANO6	NA	-0.240664	NA	-0.850509
ANO7	NA	NA	-0.0279227	NA
ANO8	NA	NA	NA	0.0629297
ANOS1	NA	0.0376915	0.141613	-0.23647
ANP32A	-0.007	-0.00102494	-0.114327	0.0153153
ANP32AP1	NA	NA	NA	-0.167269
ANP32B	0.107	-0.08719	-0.0493226	-0.215282
ANP32C	NA	NA	NA	0.0394142
ANP32D	NA	NA	-0.124693	0.341207
ANP32E	-0.009	-0.145851	0.0384788	-0.0399731
ANPEP	NA	NA	-0.0912689	NA
ANTXR1	0.119	NA	0.0569785	-0.312696
ANTXR2	0.016	NA	0.205644	-1.30123
ANUBL1	0.042	NA	NA	NA
ANXA1	NA	NA	1.04567	-0.947476
ANXA10	NA	NA	0.0504697	NA
ANXA11	-0.189	-0.0078479	0.0896613	-0.196914
ANXA13	NA	NA	-0.167384	NA
ANXA2	NA	0.0605432	-0.125371	-0.605581
ANXA2P1	NA	NA	NA	-0.4881
ANXA2P2	NA	NA	NA	-0.450428
ANXA2P3	NA	NA	NA	-0.336533
ANXA2R	NA	0.104966	-0.0615287	NA
ANXA3	NA	-0.350755	0.359882	-0.313315
ANXA4	0.073	-0.0302631	-0.106851	-0.596678
ANXA5	NA	-0.106959	-0.0499412	-2.11265
ANXA6	-0.048	0.116638	0.0377143	0.14976
ANXA7	0.174	-0.152127	0.130202	-0.706481
ANXA9	NA	NA	0.192137	NA
AOAH	NA	NA	0.159888	NA
AOC1	NA	NA	-0.00479793	NA
AOC2	NA	-0.0767806	0.0549838	-1.54414
AOC3	NA	-0.873449	-0.0649882	-1.54555
AOF1	0.105	NA	NA	NA
AOF2	0.13	NA	NA	NA
AOX1	NA	NA	-0.0284225	NA
AP1AR	NA	NA	0.0417378	-0.503325
AP1B1	-0.088	0.275405	0.041963	-0.231327
AP1G1	0.069	-0.391176	0.121993	-0.427586
AP1G2	0.004	0.207517	0.335945	-0.531236
AP1GBP1	-0.119	NA	NA	NA
AP1M1	0.061	0.162297	0.0207292	0.261199
AP1M2	0.063	NA	-0.0577616	NA
AP1S1	NA	0.036931	-0.0525926	0.202692
AP1S2	NA	0.0225741	-0.337524	-0.329322
AP1S3	NA	-0.352438	0.146333	-0.163004
AP2A1	0.047	0.135771	0.0873865	0.37388
AP2A2	0.101	0.125103	0.135597	0.0459031
AP2B1	-0.06	-0.127211	0.145408	-0.0294918
AP2M1	0.052	0.178885	-0.00411336	-0.139621
AP2S1	NA	0.134045	-0.133376	0.0722015
AP3B1	0.06	0.0188734	-0.0561738	-0.509517
AP3B2	NA	NA	-0.120221	-2.0198
AP3D1	0.28	-0.126881	0.129313	-0.14895
AP3M1	0.071	-0.453983	-0.069848	-0.806501
AP3M2	0.004	0.140283	-0.14185	-0.182144
AP3S1	NA	0.112856	-0.0630369	-0.0429955
AP3S2	NA	NA	0.0586102	-0.60151
AP4B1	-0.08	NA	-0.00189135	-0.0760034
AP4E1	0.064	NA	0.218981	-0.559368
AP4M1	NA	0.175286	-0.0307967	0.44436
AP4S1	NA	0.046213	0.213774	NA
AP5B1	NA	-0.116661	NA	-0.750048
AP5M1	NA	-0.0967895	0.000775424	-0.0765425
AP5S1	NA	0.36291	0.0994513	-0.424055
AP5Z1	NA	0.220933	0.0251982	-0.261246
APAF1	0.12	NA	0.00213566	-0.0493554
APBA1	NA	NA	-0.0277678	NA
APBA2	NA	0.381462	0.011921	0.060287
APBA3	-0.005	0.120682	0.00959954	-1.04251
APBB1	NA	0.168926	0.0137714	-0.855368
APBB1IP	NA	NA	0.0308849	NA
APBB2	NA	NA	0.0988788	-0.486105
APBB3	0.039	NA	0.200379	0.0317599
APC	NA	NA	0.0812404	-0.246186
APC2	NA	NA	-0.104509	NA
APCDD1	NA	-0.632106	-0.0360788	-0.0539257
APCDD1L	NA	NA	-0.123935	NA
APCS	NA	NA	0.00476577	NA
APEH	-0.419	0.112593	0.0891935	-0.237386
APEX1	0.049	0.168621	0.00425216	-0.453406
APEX2	-0.147	-0.0410193	-0.039148	-1.07814
APH1A	-0.276	0.0166521	-0.0913367	-0.325011
APH1B	NA	-0.145012	0.248266	-0.975628
API5	-0.13	-0.138834	0.110644	0.0415726
APIP	0.056	-0.130652	0.0427059	-0.168842
APITD1	NA	NA	-0.0629045	NA
APITD1-CORT	NA	NA	NA	-0.519924
APLF	NA	NA	0.20728	NA
APLN	-0.008	NA	-0.0492708	NA
APLNR	NA	NA	-0.0856166	NA
APLP1	NA	0.318757	0.233606	0.240645
APLP2	0.136	-0.265725	0.160121	-0.00875348
APMAP	NA	0.171855	0.158121	-0.688048
APOA1	NA	NA	-0.0521636	NA
APOA1BP	0.061	0.238516	0.180563	NA
APOA2	0.108	NA	0.146827	NA
APOA4	NA	NA	-0.105142	NA
APOA5	NA	NA	0.0329103	NA
APOB	NA	NA	-0.0781153	NA
APOBEC1	NA	NA	-0.160004	NA
APOBEC2	NA	NA	-0.0593703	NA
APOBEC3A	NA	NA	-0.0345125	NA
APOBEC3B	-0.22	-0.3561	0.230708	NA
APOBEC3C	NA	0.0140847	0.149152	-0.304524
APOBEC3D	NA	NA	0.154473	NA
APOBEC3F	NA	NA	0.152356	-0.508343
APOBEC3H	NA	NA	-0.0011196	NA
APOBEC4	NA	NA	0.00806133	NA
APOBR	NA	NA	-0.19743	NA
APOC1	NA	0.386962	-0.184402	NA
APOC2	NA	NA	-0.0376644	NA
APOC3	NA	NA	0.0262475	NA
APOC4-APOC2	NA	NA	-0.0429514	NA
APOD	NA	NA	0.270849	NA
APOE	0.027	0.0288473	-0.0746196	NA
APOF	NA	NA	-0.137642	NA
APOH	NA	NA	-0.057499	NA
APOL1	NA	NA	-0.103539	NA
APOL2	0.004	0.175047	0.143244	-0.114845
APOL3	NA	NA	-0.05917	NA
APOL4	NA	NA	-0.0504277	NA
APOL5	NA	NA	-0.0935763	NA
APOL6	NA	NA	-0.0128897	NA
APOLD1	0.245	-0.246308	0.0198494	-0.52718
APOM	NA	0.475375	NA	NA
APOO	0.08	0.26088	-0.169634	0.0212389
APOOL	NA	-0.202831	0.168337	-0.136441
APOPT1	NA	0.191167	NA	-0.695697
APP	0.191	-0.392424	0.111096	-0.0765307
APPBP2	0.44	-0.155075	0.00489175	-0.427108
APPL1	0.114	-0.315117	0.14955	-0.179016
APPL2	0.171	-0.0791592	0.147769	-0.777267
APRT	0.194	0.299409	0.010148	-0.0363458
APTX	0.022	0.0802309	0.0106903	-0.704399
AQP1	NA	NA	0.102906	NA
AQP10	0.082	NA	0.0538065	NA
AQP11	NA	NA	0.210122	NA
AQP2	NA	NA	0.0356637	NA
AQP3	0.015	NA	0.104489	NA
AQP4	NA	NA	0.0344444	NA
AQP5	NA	NA	-0.0636188	NA
AQP6	NA	NA	-0.0465301	NA
AQP7	NA	NA	-0.0458304	NA
AQP8	NA	NA	-0.0264558	NA
AQP9	NA	NA	0.0044038	NA
AQR	NA	-0.0220543	0.110523	-0.571564
AR	NA	-0.215712	-0.0152662	-0.315465
ARAF	-0.441	0.0748382	0.00910824	-1.7106
ARAP1	NA	NA	0.0591937	-0.107543
ARAP2	-0.429	NA	-0.0388044	0.204432
ARAP3	0.062	NA	0.0868831	-0.954447
ARC	NA	-0.157633	NA	-1.98687
ARCN1	0.128	-0.148204	0.149238	-0.487946
ARD1A	0.005	NA	NA	NA
AREL1	NA	NA	0.119019	0.0489778
ARF1	NA	-0.0596596	0.0307356	-0.190885
ARF3	0.232	0.217102	-0.0517002	-0.00321856
ARF4	0.159	-0.355292	-0.10305	-0.460915
ARF5	NA	0.279582	-0.0887684	0.0561038
ARF6	NA	0.00555421	0.006654	-0.0976496
ARFGAP1	0.096	0.27587	0.0773251	-0.449882
ARFGAP2	-0.208	0.235799	0.0832671	-0.103903
ARFGAP3	0.025	-0.315778	0.202597	-0.223441
ARFGEF1	0.022	-0.183987	0.0961071	-0.275984
ARFGEF2	-0.247	-0.175699	0.157976	-0.793372
ARFGEF3	NA	-0.227752	0.169296	-0.743278
ARFIP1	NA	-0.676193	0.0020624	-1.69597
ARFIP2	-0.028	0.296738	-0.0519461	-0.341997
ARFRP1	-0.251	0.174369	0.0769715	-0.166
ARG1	NA	NA	0.234926	NA
ARG2	NA	-0.00733616	0.107509	-0.585678
ARGLU1	-0.039	-0.00614828	-0.0122501	-0.313193
ARHGAP1	0.221	NA	0.155943	-0.442323
ARHGAP10	-0.064	-0.147722	-0.0214262	-0.455377
ARHGAP11A	-0.067	-0.0910585	0.091315	-0.34353
ARHGAP11B	NA	-0.309289	NA	-0.497138
ARHGAP12	0.156	-0.0527533	0.0629902	-0.0350539
ARHGAP15	NA	NA	0.139774	NA
ARHGAP17	-0.294	0.245255	0.0281998	-0.020813
ARHGAP18	0.422	NA	0.0620649	0.0944516
ARHGAP19	NA	-0.284146	-0.0808748	-0.903248
ARHGAP19-SLIT1	NA	NA	NA	-0.862267
ARHGAP20	NA	NA	-0.026455	-0.600575
ARHGAP21	0.072	-0.400777	0.179356	-0.250056
ARHGAP22	NA	NA	0.0815248	-0.276194
ARHGAP23	NA	NA	NA	-1.04506
ARHGAP24	NA	NA	-0.0287755	NA
ARHGAP25	NA	NA	0.163056	NA
ARHGAP26	NA	NA	-0.00125384	-0.402074
ARHGAP27	NA	NA	-0.0913882	NA
ARHGAP27P1-BPTFP1-KPNA2P3	NA	NA	NA	0.0817182
ARHGAP28	NA	NA	0.151554	-1.44113
ARHGAP29	0.064	NA	0.105994	-1.00177
ARHGAP30	NA	NA	-0.0356841	NA
ARHGAP31	NA	NA	NA	-0.642644
ARHGAP32	NA	NA	0.0622741	-0.140461
ARHGAP33	NA	NA	0.0932982	-0.139323
ARHGAP35	NA	-0.00101125	0.0794496	-0.00283755
ARHGAP36	NA	NA	-0.0242988	NA
ARHGAP39	NA	NA	-0.190249	-0.743977
ARHGAP4	0.234	NA	0.0116614	NA
ARHGAP42	NA	NA	NA	-0.260377
ARHGAP44	NA	-0.345625	0.0990027	-0.336588
ARHGAP5	NA	-0.105112	-0.00525893	-0.144688
ARHGAP6	NA	NA	-0.161859	NA
ARHGAP8	NA	NA	NA	-0.100564
ARHGAP9	NA	NA	-0.0507777	NA
ARHGDIA	NA	0.370404	-0.0464842	-1.21142
ARHGDIB	NA	NA	-0.215806	NA
ARHGDIG	NA	0.381027	0.0460899	-0.382969
ARHGEF1	-0.016	0.100642	0.00640533	-1.62423
ARHGEF10	-0.034	NA	0.126546	0.118803
ARHGEF10L	0.008	0.235783	0.0249875	-0.128653
ARHGEF11	0.183	NA	0.112263	0.225804
ARHGEF12	NA	NA	0.0780745	-0.332226
ARHGEF15	NA	NA	-0.0122386	NA
ARHGEF16	-0.043	NA	-0.0256829	NA
ARHGEF17	-0.005	NA	0.119285	0.0479274
ARHGEF18	-0.011	0.356641	-0.00850635	-0.112699
ARHGEF19	0.076	NA	-0.0392594	NA
ARHGEF2	0.229	-0.00712018	0.0886964	-0.488296
ARHGEF25	NA	0.503601	0.0564934	0.423022
ARHGEF26	NA	-0.145393	0.117541	0.106467
ARHGEF28	NA	NA	0.155848	0.204522
ARHGEF3	0.209	-0.131131	-0.0329937	-0.00864696
ARHGEF34P	NA	NA	NA	-0.819943
ARHGEF35	NA	NA	0.154559	NA
ARHGEF37	NA	NA	0.104177	-1.39891
ARHGEF38	NA	NA	0.24309	NA
ARHGEF39	NA	0.236913	0.182272	0.154488
ARHGEF4	0.031	NA	0.0644131	-0.315852
ARHGEF40	NA	NA	-0.00172947	-0.677653
ARHGEF5	-0.067	0.206105	0.28841	-0.619302
ARHGEF6	0.016	-0.219952	0.260018	-0.504505
ARHGEF7	NA	NA	0.0588033	-0.0865512
ARHGEF9	NA	NA	NA	-0.0452877
ARID1A	0.011	0.131093	0.0673414	-0.0874501
ARID1B	0.053	0.021571	0.0273598	-0.279277
ARID2	0.026	-0.204616	NA	-0.205578
ARID3A	NA	0.272041	0.0966344	0.516453
ARID3B	NA	0.111239	0.121489	-0.0898406
ARID4A	0.046	-0.196088	0.121251	-0.445448
ARID4B	0.02	NA	0.0842362	-0.284538
ARID5A	NA	0.17431	0.0258925	-0.680774
ARID5B	0.323	NA	NA	0.212247
ARIH1	-0.072	-0.20939	0.0630351	-0.588054
ARIH2	-0.284	0.082492	0.125075	-0.563615
ARL1	0.178	-0.0670081	0.0518658	-0.283314
ARL10	NA	NA	0.0246564	NA
ARL11	NA	NA	0.0697899	NA
ARL13B	0.313	-0.0302449	-0.135652	-1.0326
ARL14	NA	NA	0.291786	NA
ARL14EP	NA	0.073149	-0.103499	-0.700628
ARL15	NA	0.109712	-0.168308	-0.351579
ARL16	NA	0.24525	NA	-0.202153
ARL17A	NA	NA	NA	-0.619736
ARL2	-0.439	0.422764	-0.107424	0.384621
ARL2BP	-0.208	0.140667	0.0986424	-0.241199
ARL2-SNX15	NA	NA	NA	0.0138444
ARL3	0.451	-0.0951075	-0.0116576	-0.277636
ARL4A	0.045	0.0718348	0.0164764	0.0189911
ARL4C	NA	-0.0177853	0.00373333	0.0498548
ARL4D	0.056	0.126435	0.123821	-0.464663
ARL5A	-0.147	0.0766891	0.058184	-0.186904
ARL5B	0.111	-0.297559	0.0839343	-1.27655
ARL6	-0.101	-0.251446	-0.00897313	-0.0801683
ARL6IP1	NA	-0.307036	0.0038835	0.223837
ARL6IP4	0.108	0.00367272	-0.0377422	-0.271453
ARL6IP5	0.36	0.0572994	-0.0237768	0.0694175
ARL6IP6	NA	-0.179609	-0.157511	-0.578364
ARL8A	NA	0.380757	-0.0202725	0.395772
ARL8B	-0.012	-0.172178	0.107815	-0.901676
ARL9	NA	NA	0.205153	NA
ARMC1	-0.887	-0.127117	0.138347	-1.31847
ARMC10	0.348	-0.756478	-0.0194621	-0.250757
ARMC12	NA	NA	0.0535009	NA
ARMC2	NA	NA	-0.00507015	NA
ARMC3	NA	NA	0.0493052	NA
ARMC4	NA	NA	0.0906892	-0.142377
ARMC5	NA	-0.162037	-0.0493057	-0.424728
ARMC6	0.025	0.255004	-0.0794335	-0.337115
ARMC7	0.069	0.265093	-0.0840882	-0.386002
ARMC8	0.131	0.0215101	-0.0960752	-0.0122929
ARMC8	-0.145	0.0215101	-0.0960752	-0.0122929
ARMC9	-0.011	0.111812	-0.0445481	-0.248068
ARMCX1	NA	NA	-0.0500694	NA
ARMCX2	NA	-0.0506505	0.077642	NA
ARMCX3	0.11	-0.350867	0.0642069	-0.631844
ARMCX5	-0.002	0.0581067	0.039956	-0.620553
ARMCX5-GPRASP2	NA	NA	NA	-0.88868
ARMCX6	NA	0.398076	-0.0946544	-0.0639372
ARMT1	NA	-0.222118	-0.0873841	-0.500962
ARNT	0.191	NA	-0.0389332	0.0801149
ARNT2	NA	-0.0280981	-0.0590146	-0.85185
ARNTL	-0.03	-0.099985	0.0799382	NA
ARNTL2	-0.063	-0.131706	0.575329	0.238302
ARPC1A	0.02	-0.139489	0.00329663	-0.382897
ARPC1B	0.013	0.15958	NA	-1.77588
ARPC2	0.113	-0.0407509	-0.0159417	-0.229548
ARPC3	0.019	-0.100913	0.0086825	NA
ARPC4	0.144	0.291547	0.0149812	-0.721035
ARPC4-TTLL3	NA	NA	NA	-0.65939
ARPC5	0.123	0.018332	0.0088012	-0.0812281
ARPC5L	-0.104	0.159877	0.0456105	-0.445568
ARPIN	NA	NA	NA	-0.726535
ARPM1	NA	NA	NA	NA
ARPP19	NA	-0.0391838	0.0855244	-1.10039
ARPP-19	-0.154	NA	NA	NA
ARPP21	NA	NA	-0.0733053	NA
ARR3	NA	NA	-0.0474969	NA
ARRB1	NA	NA	0.0993769	-0.473552
ARRB2	0.019	0.372236	0.0106382	-0.203529
ARRDC1	-0.114	0.111551	0.0709457	-0.9135
ARRDC2	0.032	0.0723908	0.0387336	-1.54866
ARRDC3	0.259	NA	0.110757	-1.11932
ARRDC4	NA	-0.0548151	0.0165316	-1.43829
ARSA	NA	NA	0.0214535	-0.0722977
ARSB	NA	NA	0.170571	-0.426476
ARSD	NA	NA	-0.0514302	NA
ARSE	0.026	NA	-0.0703757	NA
ARSF	NA	NA	-0.0950892	NA
ARSG	NA	NA	-0.180746	NA
ARSI	NA	NA	NA	NA
ARSJ	NA	NA	0.217777	-0.378948
ARSK	NA	-0.312974	0.166221	-0.632386
ART1	NA	NA	-0.166583	NA
ART3	NA	NA	-0.0352271	NA
ART4	NA	NA	0.12052	NA
ART5	0.019	NA	-0.144474	NA
ARTN	-0.046	NA	0.0340525	NA
ARV1	NA	0.120423	-0.0426862	-0.262462
ARVCF	-0.142	NA	-0.0449032	-0.138906
ARX	NA	NA	-0.0815966	NA
AS3MT	NA	-0.0117739	0.208886	-0.45991
ASAH1	0.201	-0.116379	0.18324	-0.224343
ASAH2	NA	NA	-0.0639704	NA
ASAH2B	NA	-0.0914265	NA	NA
ASAP1	NA	-0.0159819	0.0648369	-0.184067
ASAP2	NA	-0.033113	0.06777	-0.0655714
ASAP3	0.22	0.025718	0.0386004	-0.4431
ASB1	-0.682	NA	0.148304	-1.0075
ASB10	-0.238	NA	0.177841	NA
ASB12	NA	NA	-0.0155317	NA
ASB13	0.438	0.179516	-0.0288299	-0.0444027
ASB14	NA	NA	0.0446726	NA
ASB15	NA	NA	-0.0382116	NA
ASB16	0.045	NA	-0.0549742	NA
ASB17	NA	NA	-0.15244	NA
ASB18	NA	NA	0.0155031	NA
ASB2	NA	NA	-0.0736602	NA
ASB3	0.072	-0.144179	-0.00814922	-0.72178
ASB4	NA	NA	-0.0554785	NA
ASB5	NA	NA	-0.04888	NA
ASB6	-0.337	0.274174	-0.0111645	-0.382366
ASB7	NA	-0.549629	0.105889	-0.540582
ASB8	NA	-0.0588821	0.119141	0.0779325
ASB9	-0.286	NA	-0.13509	NA
ASCC1	-0.018	0.0822828	0.0303644	-0.617902
ASCC2	-0.134	-0.000714969	0.0637413	-1.31039
ASCC3	NA	-0.277293	-0.0618612	-0.959057
ASCC3	-0.137	-0.277293	-0.0618612	-0.959057
ASCL1	NA	NA	-0.11316	NA
ASCL2	NA	NA	-0.334256	NA
ASCL3	NA	NA	0.144727	NA
ASCL4	NA	NA	-0.0635458	NA
ASF1A	NA	-0.126313	0.067865	-0.639105
ASF1B	-0.535	0.275868	-0.0510246	-0.361445
ASGR1	NA	NA	0.00176443	NA
ASGR2	NA	NA	-0.0631348	NA
ASH1L	NA	-0.165593	0.109395	-0.125701
ASH2L	-0.004	0.222477	0.0826115	-0.060495
ASIC1	NA	0.410834	0.07107	0.108422
ASIC2	NA	NA	-0.0897619	NA
ASIC4	NA	NA	-0.0189104	NA
ASIP	NA	NA	0.101366	NA
ASL	-0.064	0.405984	0.111644	-0.120092
ASMT	NA	NA	-0.0197618	NA
ASMTL	NA	0.195762	-0.0691031	0.407491
ASNA1	-0.43	0.435095	-0.0615535	0.398598
ASNS	0.41	-0.0625982	-0.0420143	-0.706343
ASNSD1	-0.056	0.097982	-0.0364538	-0.414158
ASPA	NA	NA	-0.134956	NA
ASPDH	NA	NA	-0.157765	NA
ASPH	NA	NA	0.182611	-0.00070157
ASPH	-0.111	NA	0.182611	-0.00070157
ASPHD1	NA	NA	-0.10489	NA
ASPHD2	0.013	0.35931	0.018525	-0.0834523
ASPM	-0.141	NA	0.0142587	-0.403957
ASPN	NA	NA	0.0415613	NA
ASPRV1	NA	-0.120467	-0.0594442	NA
ASPSCR1	-0.053	0.434306	-0.0564582	-0.43458
ASRGL1	-0.233	0.134269	-0.131452	-0.34381
ASS1	NA	0.00301976	0.0229241	-0.571651
ASTE1	NA	-0.191022	-0.0402906	-0.523772
ASTL	NA	NA	-0.0121453	NA
ASTN1	NA	0.345866	0.0812022	-0.0153642
ASTN2	0.023	NA	-0.0620307	NA
ASUN	NA	-0.0189253	-0.023535	NA
ASXL1	NA	0.0469225	0.0079276	0.149472
ASXL2	NA	NA	0.0180763	-0.463687
ASXL3	NA	NA	NA	0.0177072
ASZ1	NA	NA	0.112466	NA
ATAD1	0.288	-0.00272793	-0.103834	-0.321809
ATAD2	-0.024	-0.0832501	0.0505858	-0.28045
ATAD2B	NA	NA	0.501286	-0.445484
ATAD3A	0.142	0.421148	0.0714197	-0.724012
ATAD3B	NA	0.419546	0.118645	-0.718564
ATAD3C	NA	NA	0.0580858	-0.413845
ATAD5	NA	0.018984	0.0534752	-0.395371
ATAT1	NA	0.0249806	NA	-0.261251
ATCAY	NA	NA	-0.0705292	NA
ATE1	0.031	NA	0.0253562	-0.215787
ATF1	0.096	-0.0965511	-0.200609	-0.582186
ATF2	0.121	0.156742	-0.199986	-0.500853
ATF3	0.417	-0.515898	0.00162967	-2.65084
ATF4	0.124	0.033608	-0.145964	-0.55863
ATF5	NA	-0.101478	-0.0868559	-1.17877
ATF6	-0.15	-0.196906	0.123659	-0.166227
ATF6B	NA	NA	NA	-0.0549039
ATF7	0.015	0.0303362	0.00800473	-0.835752
ATF7IP	-0.26	NA	0.0230554	-0.541631
ATF7IP2	NA	-0.321339	0.283577	-0.0252786
ATG10	NA	0.00144847	-0.0003271	-0.790375
ATG101	NA	0.268257	-0.0293347	-0.413661
ATG12	-0.088	0.0441455	0.015088	-0.749601
ATG13	NA	0.126445	0.0359012	-0.227076
ATG14	NA	0.212196	0.11034	-0.197761
ATG16L1	0.118	0.0621854	0.0875457	-0.0953081
ATG16L2	-0.18	NA	NA	NA
ATG2A	NA	0.105851	NA	-0.255887
ATG2B	NA	NA	0.236143	-0.370001
ATG3	-0.037	-0.0324299	0.123432	-0.179381
ATG4A	0.031	-0.545126	0.215593	-1.16539
ATG4B	NA	0.0340052	0.0353621	-0.49384
ATG4C	0.191	-0.333296	-0.1322	-0.610816
ATG4D	NA	0.546026	0.0205121	-0.373115
ATG5	0.022	0.142434	-0.00137276	-0.33741
ATG7	NA	-0.226059	-0.0355697	-0.36193
ATG9A	-1.146	0.297122	0.17522	0.301824
ATG9B	NA	NA	-0.0273252	NA
ATHL1	0.102	NA	0.147936	NA
ATIC	0.13	0.026898	-0.0707511	-0.546013
ATL1	NA	-0.531463	0.0117853	-0.530629
ATL2	-0.099	0.0487434	-0.049183	0.00531374
ATL3	-0.011	NA	0.165676	-0.650913
ATM	NA	NA	-0.0220252	-0.280641
ATMIN	0.192	-0.0231569	0.125021	-0.657223
ATN1	0.163	NA	0.0666273	-0.133897
ATOH1	NA	NA	0.0150724	NA
ATOH7	NA	NA	-0.148501	NA
ATOH8	NA	NA	-0.0757856	NA
ATOX1	0.299	0.433703	-0.019707	0.0267861
ATP10A	NA	NA	-0.0815283	NA
ATP10B	NA	NA	0.0830557	NA
ATP10D	NA	-0.301359	0.188303	-1.21648
ATP11A	NA	NA	NA	-0.316538
ATP11B	-0.13	-0.106133	0.0891543	-0.511544
ATP11C	0.148	-0.221163	-0.000705971	-0.230187
ATP12A	NA	NA	0.38224	NA
ATP13A1	NA	0.206125	0.166523	-0.799902
ATP13A2	-0.019	0.0688426	0.0919493	-0.203814
ATP13A3	-0.426	-0.192587	0.0761954	-0.0984845
ATP13A4	NA	NA	0.000182412	NA
ATP13A5	NA	NA	-0.0739677	NA
ATP1A1	0.103	0.0781609	0.00330601	-1.21462
ATP1A2	NA	NA	-0.0270915	NA
ATP1A3	0.052	NA	0.125569	-0.614946
ATP1A4	NA	NA	-0.0066693	NA
ATP1B1	-0.332	-0.308214	-0.0264978	0.264859
ATP1B2	0.039	NA	-0.0234145	NA
ATP1B3	0.046	-0.161531	-0.022343	-0.281545
ATP1B4	NA	NA	0.254564	NA
ATP23	NA	NA	NA	-0.411124
ATP2A1	0.087	NA	0.0736118	NA
ATP2A2	0.096	0.0686712	0.161866	-0.14048
ATP2A3	NA	NA	0.0113104	NA
ATP2B1	0.102	-0.368931	-0.00823879	-0.174123
ATP2B1-AS1	NA	NA	NA	-0.15196
ATP2B2	NA	NA	0.0298143	NA
ATP2B3	NA	NA	0.0108518	NA
ATP2B4	NA	-0.0821418	0.304556	-0.971721
ATP2C1	0.072	-0.295403	-0.00433975	-0.502774
ATP2C2	NA	NA	-0.0992583	NA
ATP4A	NA	NA	-0.0476753	NA
ATP4B	NA	NA	-0.0288043	NA
ATP5A1	NA	0.146057	-0.0723448	-0.187095
ATP5B	NA	0.0385833	0.0213369	-0.223367
ATP5C1	0.086	-0.0159601	-0.0107092	-0.286346
ATP5D	NA	0.342256	-0.0970009	-0.144144
ATP5E	NA	0.181829	-0.210735	-0.115797
ATP5EP2	NA	NA	NA	0.0420926
ATP5F1	NA	-0.0472432	0.0191965	-0.536884
ATP5G1	-0.249	0.470477	-0.104825	0.387499
ATP5G2	0.045	0.0234902	-0.037358	-0.111223
ATP5G3	NA	-0.0528451	-0.174882	-0.196673
ATP5H	0.133	0.0517058	-0.065199	-0.214946
ATP5I	NA	0.311602	-0.230248	0.0692269
ATP5J	0.023	-0.0818515	-0.0623516	-0.228646
ATP5J2	0.12	0.0314469	-0.0177943	-0.09838
ATP5J2-PTCD1	NA	NA	NA	-0.140514
ATP5L	0.317	0.121127	-0.18503	-0.166682
ATP5L2	NA	NA	-0.0135311	-0.0124894
ATP5O	0.105	-0.00279897	-0.121929	-0.0462855
ATP5S	NA	-0.0230169	0.0326837	-0.0726091
ATP5SL	NA	0.0325399	-0.16496	-0.281555
ATP6AP1	0.013	0.316572	0.303999	-0.110652
ATP6AP2	-0.299	-0.0349579	0.124991	-0.423168
ATP6V0A1	0.189	0.00456816	NA	-0.555436
ATP6V0A2	NA	-0.140174	NA	-0.609806
ATP6V0A4	NA	NA	0.100622	NA
ATP6V0B	0.032	0.181315	0.112094	-0.0789878
ATP6V0C	0.195	0.30507	0.0279486	-0.0705485
ATP6V0D1	0.172	0.209767	0.0642396	-0.314155
ATP6V0D2	NA	NA	0.0797612	NA
ATP6V0E1	-0.11	0.00380408	0.0191932	-2.49264
ATP6V0E2	NA	0.0852462	0.0870428	0.283915
ATP6V0E2-AS1	NA	NA	NA	-0.894382
ATP6V1A	NA	-0.575944	0.171894	-0.65171
ATP6V1B1	NA	NA	-0.0211249	NA
ATP6V1B2	0.008	0.126066	0.130601	-0.0985993
ATP6V1C1	-0.07	-0.0914049	0.229781	-0.147575
ATP6V1C2	NA	NA	-0.101336	NA
ATP6V1D	-0.165	0.0972769	0.121113	0.159984
ATP6V1E1	0.032	0.167631	0.0370539	-0.0583731
ATP6V1E2	-0.188	NA	-0.0381984	NA
ATP6V1F	0.021	0.126639	-0.098174	0.0980116
ATP6V1G1	0.101	0.0948445	-0.0486845	-0.0592384
ATP6V1G2	NA	0.147567	NA	NA
ATP6V1G2-DDX39B	NA	NA	NA	-0.508257
ATP6V1G3	NA	NA	-0.0169651	NA
ATP6V1H	NA	NA	0.203484	-0.0846449
ATP7A	NA	0.00453552	0.186293	-1.27764
ATP7B	NA	0.213216	0.0153779	0.127572
ATP8A1	NA	NA	0.136467	-0.597592
ATP8A2	NA	NA	0.164794	NA
ATP8B1	0.083	NA	0.555786	NA
ATP8B2	NA	0.16881	0.216577	-0.598451
ATP8B3	NA	NA	0.0393846	NA
ATP8B4	NA	NA	0.0234752	NA
ATP8B5P	NA	NA	NA	-0.158907
ATP9A	-0.004	-0.385098	-0.21273	0.107822
ATP9B	NA	NA	0.11499	-0.550181
ATPAF1	NA	-0.0588466	NA	-0.296493
ATPAF2	-0.141	0.00598155	0.0787939	-0.427526
ATPBD3	-0.082	NA	NA	NA
ATPIF1	0.006	0.0572802	-0.0688218	-0.242196
ATR	NA	-0.000484298	0.0659289	-0.467174
ATRAID	NA	0.222796	-0.0208246	-0.467403
ATRIP	0.171	0.152458	0.0390572	-0.741525
ATRN	0.072	-0.308609	0.19671	-0.192854
ATRNL1	NA	NA	0.0382944	-0.294155
ATRX	NA	-0.360752	-0.0122597	-0.334022
ATXN1	0.307	NA	0.0273158	0.428599
ATXN10	0.167	-0.0869876	0.0126566	-0.285815
ATXN1L	NA	-0.0146826	NA	-0.727867
ATXN2	0.109	-0.124011	0.0986108	0.0469536
ATXN2L	0.024	NA	0.122839	-0.414453
ATXN3	-0.14	-0.37323	0.234292	0.231877
ATXN7	-0.058	-0.569906	0.0997106	-0.669022
ATXN7L1	NA	NA	0.00877864	-0.175093
ATXN7L2	NA	NA	-0.0390722	-0.70171
ATXN7L3	-0.319	0.640815	NA	0.250586
ATXN7L3B	NA	-0.192056	-0.0355651	0.00359758
AUH	0.122	-0.0347486	-0.0816355	0.0671268
AUNIP	NA	0.206403	-0.0426464	-0.076838
AUP1	0.1	-0.297058	0.0157765	-0.351736
AURKA	-0.38	0.0243617	0.166397	-0.78851
AURKAIP1	NA	0.258417	-0.0543281	-0.120817
AURKAPS1	NA	NA	NA	-0.813824
AURKB	-0.038	0.0671521	-0.00932644	-0.328231
AURKC	-0.227	NA	-0.119974	NA
AUTS2	NA	NA	-0.0154007	0.0593846
AVEN	-0.096	-0.032998	0.0278685	-0.810388
AVIL	NA	NA	-0.11305	NA
AVL9	NA	NA	0.0661317	-0.141649
AVP	NA	NA	-0.0698266	NA
AVPI1	-0.101	0.251513	-0.0045146	-0.272154
AVPR1A	NA	NA	-0.0752656	NA
AVPR2	NA	NA	-0.152588	NA
AWAT2	NA	NA	-0.262118	NA
AXDND1	NA	NA	-0.0122943	NA
AXIN1	0.055	0.367451	0.0656056	-0.954635
AXIN2	-0.313	NA	-0.0698166	0.434656
AXL	-0.503	NA	0.000900525	NA
AXUD1	-0.272	NA	NA	NA
AZGP1	NA	NA	0.138217	NA
AZI1	-0.173	NA	NA	NA
AZI2	0.211	-0.101192	0.00717906	-0.502536
AZIN1	-0.402	0.00295263	0.148064	-0.205783
AZIN2	NA	NA	0.0103881	NA
AZU1	NA	NA	-0.0891853	NA
B2M	NA	0.0242292	-0.0213383	-0.549285
B3GALNT1	0.067	NA	0.0731412	NA
B3GALNT2	0.061	NA	0.0879349	-0.458319
B3GALT1	NA	NA	-0.0566193	NA
B3GALT2	NA	NA	-0.00853963	NA
B3GALT5	NA	NA	0.359172	NA
B3GALT6	NA	0.264912	0.0956485	0.0962371
B3GAT1	NA	-0.0584221	-0.104822	-0.778323
B3GAT2	NA	NA	0.00638142	NA
B3GAT3	0.082	0.420706	0.186962	-0.142106
B3GLCT	NA	-0.710265	-0.194248	-0.252376
B3GNT1	0.125	NA	NA	NA
B3GNT2	-0.097	-0.103974	0.0334459	-1.02412
B3GNT3	-0.253	NA	-0.0658702	NA
B3GNT4	0.285	NA	0.0500847	NA
B3GNT5	-0.359	NA	-0.0626588	-0.56015
B3GNT6	NA	NA	-0.083495	NA
B3GNT7	NA	NA	0.004175	NA
B3GNT8	0.005	NA	-0.0442307	NA
B3GNT9	0.207	NA	-0.0086377	NA
B3GNTL1	NA	NA	0.016782	NA
B4GALNT1	0.015	NA	0.145023	NA
B4GALNT2	NA	NA	-0.09951	NA
B4GALNT3	NA	NA	0.0731225	-0.958384
B4GALNT4	-0.135	NA	0.0484789	-0.0821313
B4GALT1	-0.064	NA	NA	-2.50269
B4GALT2	0.126	-0.0271323	0.0386336	-0.206456
B4GALT3	-0.321	0.0677692	0.0690919	-0.296314
B4GALT4	0.068	-0.277231	0.154775	-0.40792
B4GALT5	0.327	-0.115004	0.111746	-1.07658
B4GALT6	NA	-0.0383486	0.297271	-1.13407
B4GALT7	0.068	0.255824	0.0603323	-0.347404
B4GAT1	NA	0.154657	0.280349	-0.595807
B9D1	0.211	0.40725	-0.165535	0.0521644
B9D2	0.083	0.0975087	0.004854	NA
BAALC	NA	NA	0.217042	NA
BAAT	NA	NA	-0.0790239	NA
BABAM1	NA	0.210306	0.00300713	0.0349952
BACE1	NA	-0.0297602	0.0577302	-0.730844
BACE2	0.162	0.141161	0.0275557	-0.217712
BACH1	0.472	NA	-0.000507273	-0.254079
BACH2	NA	-0.148902	0.0160114	0.220634
BAD	0.16	0.130272	-0.0143843	0.289519
BAG1	NA	0.183635	-0.0291702	-0.000341003
BAG2	0.138	-0.0371988	0.0470411	-0.218203
BAG3	-0.87	-0.00858627	0.0552492	-0.371661
BAG4	-0.102	-0.475727	0.00511333	0.0293723
BAG5	0.037	-0.00251929	0.138893	-0.431387
BAG6	NA	0.120112	NA	-0.0504653
BAHD1	-0.132	-0.088937	0.00747685	-0.0789092
BAIAP2	-0.397	NA	0.00199746	-0.425526
BAIAP2	-0.087	NA	0.00199746	-0.425526
BAIAP2-AS1	NA	NA	NA	0.330371
BAIAP2L1	-0.024	-0.142638	-0.0130859	-0.229009
BAIAP2L2	NA	NA	-0.0489763	NA
BAIAP3	0.166	NA	0.116002	NA
BAK1	-0.261	0.241666	0.197691	-0.429479
BAMBI	-0.021	0.0523523	-0.0748366	-0.133808
BANF1	0.008	0.105614	-0.107691	-0.0895271
BANF2	NA	NA	-0.140785	NA
BANK1	NA	NA	-0.0784712	NA
BANP	-0.124	0.424552	-0.0142845	-0.206959
BAP1	0.045	-0.0274354	0.0556257	0.150629
BARD1	0.025	-0.18065	-0.137627	-0.331187
BARHL1	NA	NA	-0.0456184	NA
BARHL2	NA	NA	-0.00353988	NA
BARX1	NA	NA	-0.0851696	NA
BARX2	NA	-0.0405695	-0.102	-1.88241
BASP1	NA	0.0482304	0.00158148	-0.0533485
BATF	NA	NA	-0.0478695	NA
BATF2	NA	NA	0.00713892	NA
BATF3	0.083	0.282947	-0.0339759	-0.444134
BAX	0.05	0.0677216	-0.0470657	-0.271788
BAX	0.141	0.0677216	-0.0470657	-0.271788
BAZ1A	-0.143	-0.27944	-0.0325113	-0.454857
BAZ1B	0.015	-0.350626	0.0352205	-0.229157
BAZ2A	-0.097	NA	0.0932568	-0.137418
BAZ2B	-0.049	-0.110778	0.113925	-0.332499
BBC3	-0.193	0.00606304	-0.0466766	-0.201404
BBIP1	NA	0.0543281	NA	-0.19464
BBOF1	NA	NA	0.0160763	-0.270525
BBOX1	NA	NA	0.0342269	NA
BBS1	0.126	NA	-0.0480585	-0.539361
BBS10	0.261	-0.0670389	-0.0290098	-0.509061
BBS12	NA	0.332085	-0.0506887	-0.746164
BBS2	0.117	0.0980963	-0.0890707	0.0998354
BBS4	0.031	0.154551	0.0150798	0.0102972
BBS5	NA	NA	0.104879	-0.100458
BBS7	0.201	0.0818448	-0.034917	-0.360907
BBS9	NA	NA	-0.0410761	0.604615
BBX	0.173	-0.197719	-0.118257	-0.523092
BCAM	-0.074	NA	0.0687784	0.0949755
BCAN	NA	NA	-0.0199052	NA
BCAP29	0.038	-0.164641	0.123074	-0.453525
BCAP31	0.152	0.0764019	0.0504557	-0.266501
BCAR1	0.061	NA	-0.00905065	-0.357376
BCAR3	-0.045	NA	-0.0332339	0.211098
BCAS1	NA	NA	0.102698	NA
BCAS2	0.087	-0.111112	-0.0240591	-0.44927
BCAS3	-0.036	0.115465	0.0335225	-0.249998
BCAS4	0.018	0.0293284	-0.0493217	0.217637
BCAT1	NA	-0.286936	0.0421167	-1.25535
BCAT2	-0.594	0.0820268	0.460491	-0.0563686
BCCIP	0.086	-0.0384801	-0.0379679	-0.403906
BCCIP	0.11	-0.0384801	-0.0379679	-0.403906
BCDIN3D	0.001	-0.0154513	-0.0889496	-0.587888
BCHE	NA	NA	0.255394	NA
BCKDHA	0.029	0.493758	NA	-0.349058
BCKDHB	NA	-0.0660329	-0.0816113	-0.285656
BCKDK	-0.268	0.217276	0.143623	-0.127514
BCL10	0.196	NA	-0.0449008	-0.309124
BCL11A	NA	-0.123468	-0.0560633	0.0698681
BCL11B	NA	-0.175513	-0.099907	-0.711709
BCL2	NA	NA	-0.0640938	0.549994
BCL2A1	NA	NA	-0.370123	NA
BCL2L1	0.124	0.14059	-0.0411384	-0.117175
BCL2L10	NA	NA	0.0650306	NA
BCL2L11	NA	0.092429	0.141196	0.0172954
BCL2L12	-0.448	-0.831023	-0.0500058	0.0258243
BCL2L13	-0.421	NA	0.116248	-0.632447
BCL2L14	NA	NA	-0.148225	NA
BCL2L2	-0.593	-0.166063	0.0416769	-0.358408
BCL2L2-PABPN1	NA	NA	NA	-0.428008
BCL3	0.186	NA	-0.0818598	NA
BCL6	0.039	NA	0.0383252	0.340799
BCL6B	NA	NA	-0.085838	NA
BCL7A	-0.138	-0.604631	NA	-0.28756
BCL7B	-0.01	0.279285	-0.0256915	-0.0465454
BCL7C	-0.088	0.287707	-0.0369213	-0.12755
BCL9	0.027	-0.427495	-0.0645207	0.495124
BCL9L	NA	NA	-0.057273	-0.147131
BCLAF1	0.148	-0.258106	-0.0970563	-0.271793
BCO1	NA	NA	-0.113504	NA
BCO2	NA	NA	-0.093951	NA
BCOR	0.064	-0.093683	8.80105e-05	0.0920357
BCORL1	0.176	NA	0.0102907	-0.0156811
BCR	-0.313	0.155318	0.103583	0.0402121
BCS1L	-0.035	0.276239	0.039942	-0.421652
BDH1	0.195	NA	-0.0486419	NA
BDH2	NA	-0.0361502	0.155298	0.0361381
BDKRB1	NA	NA	0.0881037	NA
BDKRB2	NA	NA	0.209326	NA
BDNF	-0.471	NA	-0.148141	NA
BDP1	NA	NA	-0.00578229	-0.515067
BECN1	-0.251	0.0168214	0.198605	-0.344062
BEGAIN	0.012	0.498507	-0.0480068	NA
BEND2	NA	NA	-0.182344	NA
BEND3	NA	-0.232468	NA	-0.397637
BEND4	NA	-0.123501	-0.0182756	-0.726038
BEND5	NA	NA	0.0143873	NA
BEND6	NA	NA	0.181374	-1.37004
BEND7	NA	NA	0.156836	-0.179194
BEST1	NA	NA	0.19326	NA
BEST2	NA	NA	-0.095989	NA
BEST3	NA	NA	0.0504337	NA
BEST4	NA	NA	-0.0892886	NA
BET1	0.428	-0.0642448	-0.110711	-0.353273
BET1L	-0.059	0.245637	0.0785807	-0.435078
BEX1	NA	0.0932863	-0.124956	-1.40268
BEX2	0.323	0.103841	0.0969097	-1.32402
BEX3	NA	NA	NA	-0.524853
BEX4	NA	-0.216257	NA	-0.306617
BEX5	NA	0.278776	NA	NA
BFAR	-0.077	0.0792252	-0.0409352	-0.507012
BFSP1	-0.284	0.266677	-0.0396189	-1.18169
BFSP2	NA	NA	-0.0095466	NA
BGN	-0.019	NA	-0.144297	NA
BHLHB9	NA	-0.208596	-0.0311655	-0.0561571
BHLHE22	NA	NA	0.0621625	NA
BHLHE40	0.022	-0.210728	-0.087582	-0.475957
BHLHE41	NA	NA	0.094378	0.577128
BHMT	NA	NA	9.54333e-05	NA
BHMT2	NA	NA	-0.0697731	NA
BICC1	NA	NA	0.0538847	-0.542245
BICD1	0.141	NA	0.0444758	-0.574469
BICD2	NA	-0.170388	0.146219	-0.45658
BICDL1	NA	NA	NA	-0.237349
BID	0.097	0.0760411	-0.0952434	-0.555686
BIK	-0.127	0.131467	0.00783296	NA
BIN1	0.122	NA	0.0206261	NA
BIN2	NA	NA	-0.179554	NA
BIN3	NA	0.127007	-0.0487281	-0.439977
BIRC2	0.15	0.173873	0.0919435	-0.721783
BIRC3	NA	NA	0.392545	NA
BIRC5	-0.437	0.18464	0.104091	-0.311446
BIRC6	-0.012	0.00616263	-0.0360386	-0.166981
BIRC7	NA	-0.0219317	-0.0910158	NA
BIRC8	NA	NA	-0.149316	NA
BIVM	0.169	NA	0.092043	-0.282309
BIVM-ERCC5	NA	NA	NA	-0.478476
BLCAP	0.528	0.0722785	0.01975	-0.0235548
BLK	NA	NA	-0.0182251	NA
BLM	0.063	0.00336561	-0.00693907	-0.219129
BLMH	-0.431	0.048496	0.0198339	-0.326924
BLNK	NA	NA	-0.0766127	NA
BLOC1S1	-0.054	0.362111	-0.135805	-0.0127863
BLOC1S1-RDH5	NA	NA	NA	-0.01413
BLOC1S2	0.112	-0.024898	0.0777427	-0.318901
BLOC1S3	NA	0.0446661	0.0378979	-0.233121
BLOC1S4	NA	-0.638591	0.00996356	-0.186509
BLOC1S5	NA	NA	-0.015426	-0.784205
BLOC1S5-TXNDC5	NA	NA	NA	-0.537317
BLOC1S6	NA	0.027747	0.113053	-0.954027
BLVRA	0.023	0.00137669	-0.0418451	-0.489783
BLVRB	0.051	0.26672	-0.183998	-0.201063
BLZF1	0.229	-0.200585	-0.0915245	-0.656196
BMF	NA	NA	-0.0860058	0.0466325
BMI1	NA	NA	-0.0432853	-0.282119
BMP1	0.086	NA	0.0827647	-0.399488
BMP10	NA	NA	0.192118	NA
BMP15	NA	NA	-0.146718	NA
BMP2	NA	-0.144515	-0.111935	0.587779
BMP2K	-0.149	NA	0.122951	-0.483989
BMP3	NA	NA	-0.176111	0.357482
BMP4	-0.115	NA	-0.0968607	NA
BMP5	NA	NA	0.0237479	NA
BMP6	NA	NA	-0.0399973	-0.816084
BMP7	0.039	0.177167	-0.0566632	0.190187
BMP8A	NA	NA	0.0331446	NA
BMP8B	-0.065	-0.132524	0.0395756	-0.0397678
BMPER	NA	NA	0.00883315	NA
BMPR1A	0.065	-0.413016	0.0747207	-1.0007
BMPR1B	NA	NA	-0.0181163	-0.89713
BMPR2	0.107	-0.179933	0.207449	-0.210536
BMS1	-0.1	-0.0712992	0.0283221	-0.604296
BMS1P20	NA	NA	NA	-0.320575
BMS1P4	NA	NA	NA	-0.765404
BMT2	NA	NA	NA	-0.392079
BMX	NA	NA	-0.153097	NA
BNC1	NA	NA	0.00177167	NA
BNC2	NA	NA	0.0370017	0.0500227
BNIP1	-0.061	0.187845	-0.119539	-0.8356
BNIP2	0.083	0.0209897	0.079063	0.0176896
BNIP3	-0.585	-0.0704917	0.002079	-0.295235
BNIP3L	-0.017	-0.281502	-0.00958746	-0.027765
BNIPL	NA	NA	0.0256544	NA
BOC	NA	NA	-0.0222419	NA
BOD1	NA	-0.0347715	-0.16552	-0.605939
BOD1L1	NA	NA	0.214841	-0.402813
BOD1L2	NA	NA	0.0838365	NA
BOK	0.068	NA	-0.048443	NA
BOLA1	0.074	0.128388	0.0107413	NA
BOLA2	NA	NA	NA	-0.243834
BOLA2B	NA	NA	NA	-0.243834
BOLA3	-0.148	0.139449	-0.0203813	-0.0942906
BOLL	NA	NA	0.139867	NA
BOP1	0.046	NA	NA	-0.260676
BORA	NA	0.346765	-0.10882	-0.2773
BORCS5	NA	0.33862	0.0532672	-0.28207
BORCS6	NA	NA	-0.0515045	0.0863862
BORCS7	NA	0.115597	0.266392	-0.246455
BORCS7-ASMT	NA	NA	NA	-0.383794
BORCS8	NA	NA	NA	-0.00654707
BORCS8-MEF2B	NA	NA	0.161935	-0.744358
BPGM	0.044	-0.0919592	0.012608	0.0392816
BPHL	NA	-0.262091	0.0641281	-0.368672
BPI	NA	NA	-0.12229	NA
BPIFA1	NA	NA	-0.0483212	NA
BPIFA2	NA	NA	-0.054326	NA
BPIFA3	NA	NA	-0.0783791	NA
BPIFB1	NA	NA	-0.0740485	NA
BPIFB2	NA	NA	-0.0299919	NA
BPIFB3	NA	NA	-0.106624	NA
BPIFB4	NA	NA	-0.0929077	NA
BPIFB6	NA	NA	-0.0784116	NA
BPIFC	NA	NA	0.0709944	NA
BPNT1	0.026	-0.076326	-0.101102	-0.0188746
BPTF	NA	-0.160992	0.066724	-0.0203478
BRAF	NA	-0.262497	0.0961003	0.0802998
BRAP	-0.099	-0.154569	-0.00667929	-0.583249
BRAT1	NA	0.269896	0.0357363	-0.487419
BRCA1	-0.028	-0.155503	0.083903	-0.385159
BRCA2	NA	-0.399635	0.166577	-0.261112
BRCC3	NA	-0.0120043	0.0897684	-0.201536
BRD1	-0.046	-0.106753	0.0210653	NA
BRD2	NA	-0.0624951	NA	NA
BRD3	0.27	-0.159722	-0.00748518	0.00587411
BRD4	0.087	0.014841	0.00860622	-0.292968
BRD7	-0.014	-0.248553	0.10171	-0.0219825
BRD8	NA	NA	0.0444251	-0.197871
BRD9	0.03	0.191936	0.0425036	-0.131218
BRDT	NA	NA	0.0621069	NA
BRE	0.115	0.0967055	-0.0119839	-0.324121
BRF1	0.002	NA	0.0391764	-0.219818
BRF2	-0.234	0.214188	-0.0714811	-0.502969
BRI3	0.1	0.361832	-0.143626	0.192545
BRI3BP	0.138	0.00151898	0.110811	-0.132516
BRICD5	NA	NA	-0.129122	NA
BRINP1	NA	NA	-0.162742	NA
BRINP2	NA	NA	-0.0116556	NA
BRINP3	NA	NA	0.105481	NA
BRIP1	NA	-0.368357	0.198957	-0.49013
BRIX1	NA	-0.00568374	-0.0932936	-0.44522
BRK1	NA	0.168079	NA	-0.299903
BRMS1	-0.063	0.167331	-0.0896248	0.00255595
BRMS1L	0.191	-0.25944	0.200214	0.118882
BROX	NA	0.391382	0.0850997	-0.4672
BRP44	0.022	NA	NA	NA
BRP44L	0.072	NA	NA	NA
BRPF1	-0.021	0.10334	0.0280406	-0.544228
BRPF3	-0.218	NA	NA	-0.86162
BRS3	0.126	NA	-0.071315	NA
BRSK1	-0.012	NA	0.165587	0.10962
BRSK2	NA	NA	0.0154139	NA
BRUNOL4	-0.008	NA	NA	NA
BRUNOL5	NA	NA	NA	NA
BRWD1	NA	NA	-0.0121944	-0.260918
BRWD2	-0.011	NA	NA	NA
BRWD3	NA	-0.122232	0.0945316	-0.0537187
BSCL2	0.104	NA	-0.100597	-0.333248
BSDC1	-0.153	0.233029	0.310007	0.0560103
BSG	-0.067	0.101061	0.0311879	-0.117901
BSN	NA	NA	-0.0171821	-0.91701
BSND	NA	NA	0.0134626	NA
BSPRY	-0.223	0.0987791	0.153349	NA
BST1	NA	NA	0.0627513	NA
BST2	NA	0.0883353	-0.0113043	NA
BTAF1	-0.174	-0.0923822	0.0516027	-0.252579
BTBD1	0.054	-0.0236504	0.0541274	-0.185129
BTBD10	-0.12	-0.18441	0.0728372	-0.521193
BTBD11	-0.027	-0.329144	-0.185356	0.354556
BTBD16	NA	NA	-0.0544159	NA
BTBD2	0.04	0.748084	-0.083332	-0.00342146
BTBD3	0.019	-0.0897559	0.0179818	-0.0344567
BTBD6	0.156	0.13227	0.113346	0.107707
BTBD7	NA	-0.0603125	0.03052	-0.593688
BTBD8	NA	NA	0.356344	NA
BTBD9	-0.115	NA	0.152243	0.289379
BTC	NA	NA	-0.181457	NA
BTD	0.004	0.381352	0.070931	-0.370289
BTF3	NA	-0.0534837	-0.111271	-0.0185985
BTF3L4	0.291	-0.11717	0.07905	-0.0424804
BTF3P11	NA	NA	NA	-0.0841323
BTG1	0.544	0.00333877	-0.0895265	-0.351152
BTG2	-1.164	0.245164	0.288148	-0.840074
BTG3	-0.077	-0.0683235	-0.0309626	-1.18586
BTG4	NA	NA	0.020885	NA
BTK	NA	NA	-0.120427	NA
BTLA	NA	NA	-0.153899	NA
BTN1A1	NA	NA	0.187769	NA
BTN2A1	-0.077	0.0458441	0.194956	-0.442689
BTN2A2	NA	NA	0.0496007	-0.125318
BTN2A3P	NA	NA	NA	-0.983512
BTN3A1	0.013	NA	0.237935	-0.287247
BTN3A2	-0.198	-0.147227	0.180672	-0.0121036
BTN3A3	NA	-0.281503	0.215551	NA
BTNL3	NA	NA	0.157898	NA
BTNL8	NA	NA	0.0170298	NA
BTNL9	NA	NA	0.0482782	-0.786969
BTRC	-0.397	NA	0.113994	0.230304
BUB1	-0.062	NA	-0.0381115	-0.113773
BUB1B	0.018	-0.0873652	-0.0184344	-0.454166
BUB1B-PAK6	NA	NA	NA	-0.375297
BUB3	-0.112	0.032259	-0.0551386	-0.257926
BUD13	-0.128	0.231625	-0.018844	-0.0310352
BUD31	0.129	0.0980111	-0.157684	-0.537068
BVES	NA	NA	0.166652	-1.56878
BXDC1	-0.534	NA	NA	NA
BXDC2	-0.093	NA	NA	NA
BXDC5	0.013	NA	NA	NA
BYSL	-0.09	-0.0307606	0.0639497	-0.586671
BZRAP1	NA	NA	-0.0140985	NA
BZW1	-0.112	-0.232448	-0.112644	-0.468373
BZW2	0.183	-0.0517221	-0.120619	0.00827501
C10orf10	NA	NA	-0.0350334	NA
C10ORF104	0.194	NA	NA	NA
C10orf107	NA	NA	0.0552667	NA
C10orf11	NA	NA	-0.167663	NA
C10ORF11	NA	NA	NA	NA
C10ORF116	0.245	NA	NA	NA
C10ORF119	0.048	NA	NA	NA
C10orf12	NA	-0.264742	0.0950814	NA
C10ORF137	0.067	NA	NA	NA
C10ORF18	0.073	NA	NA	NA
C10orf2	NA	0.239117	-0.00406305	NA
C10ORF2	0.033	NA	NA	NA
C10ORF26	0.048	NA	NA	NA
C10ORF28	0.072	NA	NA	NA
C10ORF33	-0.094	NA	NA	NA
C10orf35	NA	0.454662	0.0390076	-0.673987
C10ORF35	-0.054	NA	NA	NA
C10ORF46	-0.024	NA	NA	NA
C10ORF47	-0.109	NA	NA	NA
C10orf53	NA	NA	-0.0569629	NA
C10orf54	NA	NA	-0.0202725	NA
C10orf55	NA	NA	-0.228044	NA
C10ORF57	0.089	NA	NA	NA
C10ORF59	0.052	NA	NA	NA
C10orf62	NA	NA	0.075026	NA
C10orf67	NA	NA	-0.121322	NA
C10orf71	NA	NA	-0.00406447	NA
C10orf76	NA	-0.0554481	0.1112	-0.32157
C10ORF76	0.106	NA	NA	NA
C10orf82	NA	NA	-0.037511	NA
C10ORF82	0.06	NA	NA	NA
C10orf88	NA	-0.207153	0.115465	-0.0833529
C10ORF88	0.081	NA	NA	NA
C10orf90	NA	NA	0.0262845	NA
C10ORF95	-0.051	NA	NA	NA
C10ORF97	-0.021	NA	NA	NA
C10orf99	NA	NA	-0.198378	NA
C11orf1	NA	0.26864	-0.0832404	-1.01166
C11ORF10	-0.042	NA	NA	NA
C11orf16	NA	NA	-0.159444	NA
C11ORF17	-0.076	NA	NA	NA
C11ORF2	-0.03	NA	NA	NA
C11orf21	NA	NA	-0.0867441	NA
C11orf24	NA	-0.592222	0.0571546	-0.525204
C11ORF24	-0.342	NA	NA	NA
C11orf30	NA	0.060928	0.0774064	NA
C11ORF30	0.074	NA	NA	NA
C11orf31	NA	0.154676	0.0463131	NA
C11orf40	NA	NA	-0.055801	NA
C11orf42	NA	NA	-0.0662978	NA
C11ORF42	0.125	NA	NA	NA
C11orf45	NA	0.460003	-0.0536704	NA
C11ORF45	-0.017	NA	NA	NA
C11ORF48	0.005	NA	NA	NA
C11orf49	NA	0.143129	-0.0602732	-0.725569
C11ORF51	0.094	NA	NA	NA
C11orf52	NA	NA	-0.11475	NA
C11orf53	NA	NA	0.0663787	NA
C11orf54	NA	-0.205689	-0.0108655	-0.699889
C11ORF54	0.229	NA	NA	NA
C11orf57	NA	-0.129348	-0.0285387	-0.738194
C11orf58	NA	0.0244614	-0.122165	-0.68379
C11ORF59	0.019	NA	NA	NA
C11ORF60	0.292	NA	NA	NA
C11orf63	NA	NA	0.148091	-0.241344
C11orf65	NA	NA	-0.130605	NA
C11orf68	NA	-0.449777	-0.0338963	0.116996
C11orf70	NA	0.200401	0.214249	NA
C11orf71	NA	0.272623	-0.104269	NA
C11orf73	NA	0.0332315	-0.0666761	NA
C11ORF73	0.178	NA	NA	NA
C11orf74	NA	0.230484	-0.0517117	-0.513356
C11ORF74	0.077	NA	NA	NA
C11ORF75	0.099	NA	NA	NA
C11ORF79	-0.009	NA	NA	NA
C11orf80	NA	NA	0.0638621	-0.0333888
C11ORF80	0.025	NA	NA	NA
C11ORF82	0.037	NA	NA	NA
C11orf84	NA	0.319997	-0.0662609	-0.557827
C11orf87	NA	NA	0.0251908	NA
C11orf88	NA	NA	-0.141593	NA
C11orf95	NA	NA	NA	0.117864
C11orf96	NA	-0.203149	NA	-2.52087
C12orf10	NA	0.151036	-0.0673856	-0.179865
C12ORF10	0.095	NA	NA	NA
C12ORF11	0.048	NA	NA	NA
C12ORF23	0.252	NA	NA	NA
C12ORF24	-0.02	NA	NA	NA
C12orf29	NA	-0.155587	-0.0458997	-0.3496
C12ORF30	-0.197	NA	NA	NA
C12ORF32	-0.024	NA	NA	NA
C12ORF34	NA	NA	NA	NA
C12ORF35	0.225	NA	NA	NA
C12ORF36	NA	NA	NA	NA
C12orf4	NA	-0.0777176	0.223824	0.00606203
C12ORF4	0.249	NA	NA	NA
C12orf40	NA	NA	0.047092	NA
C12ORF41	0	NA	NA	NA
C12orf42	NA	NA	-0.0873181	NA
C12orf43	NA	0.0677554	0.02368	-0.0230014
C12orf45	NA	0.137689	NA	-0.348932
C12ORF45	-0.082	NA	NA	NA
C12orf49	NA	0.0975565	-0.0213392	-0.123182
C12ORF49	0.168	NA	NA	NA
C12ORF5	0.209	NA	NA	NA
C12orf50	NA	NA	-0.160178	NA
C12ORF52	-0.011	NA	NA	NA
C12orf54	NA	NA	-0.147296	NA
C12orf57	NA	NA	-0.193095	0.13682
C12ORF57	0.024	NA	NA	NA
C12orf60	NA	NA	-0.0131903	NA
C12ORF60	0.029	NA	NA	NA
C12ORF62	-0.06	NA	NA	NA
C12orf65	NA	0.0243971	0.0403056	-0.525357
C12orf66	NA	0.0725893	0.109508	-0.735629
C12ORF66	0.013	NA	NA	NA
C12orf73	NA	0.0383876	NA	0.173081
C12orf75	NA	-0.0134094	-0.0074905	0.0113116
C12orf76	NA	0.0984912	-0.0031624	0.185633
C13ORF23	0.058	NA	NA	NA
C13ORF27	-0.032	NA	NA	NA
C13ORF3	-0.025	NA	NA	NA
C13ORF34	-0.135	NA	NA	NA
C14orf1	NA	-0.0664492	0.0511324	-0.378955
C14orf105	NA	NA	-0.138585	NA
C14ORF106	-0.158	NA	NA	NA
C14orf119	NA	0.205857	-0.192642	-0.351308
C14ORF119	NA	NA	NA	NA
C14ORF126	0.326	NA	NA	NA
C14ORF129	-0.119	NA	NA	NA
C14ORF133	-0.109	NA	NA	NA
C14ORF135	-0.014	NA	NA	NA
C14orf142	NA	0.090222	-0.178948	NA
C14ORF142	0.266	NA	NA	NA
C14ORF145	-0.012	NA	NA	NA
C14ORF147	0.131	NA	NA	NA
C14ORF149	-0.161	NA	NA	NA
C14ORF151	-0.077	NA	NA	NA
C14ORF156	NA	NA	NA	NA
C14orf159	NA	0.122985	-0.00470417	0.115391
C14orf166	NA	0.0340765	-0.0566907	-0.0980217
C14ORF166	-0.218	NA	NA	NA
C14orf169	NA	NA	-0.0440602	NA
C14orf177	NA	NA	-0.182872	NA
C14orf178	NA	NA	-0.00902685	NA
C14orf2	NA	0.113589	-0.175956	-0.171183
C14ORF2	0.197	NA	NA	NA
C14ORF21	NA	NA	NA	NA
C14orf37	NA	NA	0.0629915	NA
C14orf39	NA	NA	0.0387609	NA
C14orf79	NA	NA	-0.0462499	-0.675785
C14orf80	NA	0.251662	-0.0805763	-0.635498
C14orf93	NA	NA	0.181614	NA
C14ORF94	-0.028	NA	NA	NA
C15ORF17	-0.308	NA	NA	NA
C15ORF24	0.135	NA	NA	NA
C15ORF29	0.115	NA	NA	NA
C15orf38-AP3S2	NA	NA	NA	-0.634516
C15orf39	NA	0.0974386	0.0171676	-0.270114
C15ORF39	-0.545	NA	NA	NA
C15orf40	NA	0.0346137	0.0491416	-0.42396
C15ORF40	-0.846	NA	NA	NA
C15orf41	NA	NA	0.0762037	-0.389473
C15ORF41	0.158	NA	NA	NA
C15ORF42	-0.09	NA	NA	NA
C15orf43	NA	NA	-0.0356779	NA
C15ORF44	0	NA	NA	NA
C15orf48	NA	0.224024	-0.0919627	NA
C15orf52	NA	NA	0.00838768	NA
C15orf53	NA	NA	-0.201971	NA
C15orf57	NA	-0.156955	-0.0457823	-0.55481
C15ORF57	-0.173	NA	NA	NA
C15orf59	NA	0.208717	NA	0.0607176
C15orf61	NA	0.0871735	NA	0.25165
C15orf65	NA	0.766932	NA	NA
C16orf13	NA	0.105898	-0.0397389	NA
C16orf45	NA	NA	0.208537	NA
C16orf46	NA	-0.04775	0.0407803	NA
C16ORF48	0.039	NA	NA	NA
C16ORF5	-0.008	NA	NA	NA
C16orf52	NA	-0.309692	0.0666344	0.0827955
C16ORF53	0.004	NA	NA	NA
C16orf54	NA	NA	-0.12416	NA
C16ORF55	NA	NA	NA	NA
C16ORF57	0.059	NA	NA	NA
C16orf58	NA	0.126656	0.210579	-0.542434
C16ORF58	0.146	NA	NA	NA
C16orf59	NA	0.270687	-0.0285067	-0.217402
C16ORF59	-0.058	NA	NA	NA
C16ORF61	-0.005	NA	NA	NA
C16orf62	NA	0.0279623	0.0950839	-0.15585
C16ORF68	0.022	NA	NA	NA
C16ORF7	0.003	NA	NA	NA
C16orf70	NA	-0.213947	-0.00877757	0.180302
C16ORF70	0.017	NA	NA	NA
C16orf71	NA	NA	-0.0951709	NA
C16orf72	NA	0.0269456	0.0185928	-0.648409
C16ORF73	0.023	NA	NA	NA
C16orf74	NA	NA	-0.0389	NA
C16ORF75	0.051	NA	NA	NA
C16orf78	NA	NA	0.244934	NA
C16ORF80	-0.052	NA	NA	NA
C16orf87	NA	-0.165423	-0.0273471	-0.557065
C16orf89	NA	NA	0.0536535	NA
C16orf91	NA	0.3625	NA	NA
C17orf100	NA	NA	NA	-0.205739
C17ORF28	0.268	NA	NA	NA
C17ORF37	0.103	NA	NA	NA
C17ORF42	0.078	NA	NA	NA
C17orf47	NA	NA	-0.0293431	NA
C17ORF48	0.031	NA	NA	NA
C17orf49	NA	NA	NA	0.137522
C17orf51	NA	NA	NA	-0.309429
C17orf53	NA	0.354717	-0.00491011	-0.0296783
C17ORF53	-0.041	NA	NA	NA
C17ORF55	NA	NA	NA	NA
C17ORF56	-0.123	NA	NA	NA
C17orf58	NA	-0.151881	0.0551396	-0.249536
C17ORF58	-0.137	NA	NA	NA
C17ORF61	0.126	NA	NA	NA
C17orf62	NA	0.339713	-0.00465747	-0.178798
C17orf64	NA	NA	-0.15297	NA
C17ORF65	-0.183	NA	NA	NA
C17ORF68	-0.072	NA	NA	NA
C17ORF70	-0.085	NA	NA	NA
C17ORF71	0.017	NA	NA	NA
C17orf74	NA	NA	-0.084236	NA
C17orf75	NA	-0.187726	0.145469	-0.282381
C17ORF75	-0.115	NA	NA	NA
C17ORF79	0.091	NA	NA	NA
C17orf80	NA	-0.0213616	0.002944	-0.356368
C17orf97	NA	NA	-0.268925	NA
C17orf99	NA	NA	-0.00720514	NA
C18ORF10	0.051	NA	NA	NA
C18orf21	NA	-0.00315475	-0.00068282	-0.0545033
C18ORF21	0.021	NA	NA	NA
C18ORF22	-0.03	NA	NA	NA
C18ORF24	-0.146	NA	NA	NA
C18orf25	NA	NA	-0.00254789	-0.466585
C18orf32	NA	NA	0.151654	0.428265
C18ORF45	0.071	NA	NA	NA
C18orf54	NA	NA	NA	-0.696472
C18ORF55	-0.1	NA	NA	NA
C18orf8	NA	NA	0.155966	-0.322346
C18ORF8	-0.155	NA	NA	NA
C19ORF10	0.259	NA	NA	NA
C19orf12	NA	0.174744	0.254493	0.288275
C19orf18	NA	NA	0.230054	NA
C19ORF21	-0.01	NA	NA	NA
C19ORF22	-0.053	NA	NA	NA
C19orf24	NA	0.324387	NA	-0.323317
C19ORF24	0.111	NA	NA	NA
C19orf25	NA	0.225972	0.0172546	-0.448541
C19ORF25	0.035	NA	NA	NA
C19ORF26	NA	NA	NA	NA
C19ORF28	-0.219	NA	NA	NA
C19orf33	NA	NA	-0.00861775	NA
C19orf35	NA	NA	-0.0214923	NA
C19ORF40	0.417	NA	NA	NA
C19ORF42	0.171	NA	NA	NA
C19orf43	NA	-0.177045	-0.103725	0.177277
C19ORF43	-0.005	NA	NA	NA
C19orf44	NA	0.235866	0.044563	-0.365666
C19orf45	NA	NA	-0.107874	NA
C19orf47	NA	NA	-0.0222255	NA
C19ORF47	0.141	NA	NA	NA
C19orf48	NA	0.0403808	-0.0942388	-0.695204
C19ORF50	0.009	NA	NA	NA
C19ORF51	0.133	NA	NA	NA
C19orf52	NA	0.0837283	0.0032168	NA
C19ORF52	-0.04	NA	NA	NA
C19orf53	NA	0.144139	-0.142434	0.108329
C19ORF53	0.041	NA	NA	NA
C19orf54	NA	-0.0124438	0.0119483	-0.74151
C19ORF56	-0.059	NA	NA	NA
C19orf57	NA	NA	0.168875	NA
C19ORF57	NA	NA	NA	NA
C19ORF6	0.045	NA	NA	NA
C19orf60	NA	0.37305	0.0215781	0.156258
C19ORF61	-0.139	NA	NA	NA
C19ORF63	0.115	NA	NA	NA
C19orf66	NA	NA	0.014229	NA
C19ORF66	0.143	NA	NA	NA
C19orf68	NA	-0.0307905	-0.0066938	NA
C19orf70	NA	0.357692	-0.04337	0.171797
C19orf73	NA	NA	0.0597255	NA
C19orf80	NA	NA	-0.0893821	NA
C19orf81	NA	0.163825	NA	NA
C1D	0.087	-0.312308	0.0756865	-0.137729
C1GALT1	0.044	-0.12393	-0.0499572	-0.756864
C1GALT1C1	0	0.0143687	-0.0824426	-0.153058
C1GALT1C1L	NA	NA	NA	-0.443134
C1orf101	NA	NA	-0.0431538	NA
C1ORF102	-0.753	NA	NA	NA
C1orf105	NA	NA	-0.0835094	NA
C1orf106	NA	NA	0.119909	NA
C1ORF107	-0.201	NA	NA	NA
C1orf109	NA	-0.331072	-0.0112903	-0.92494
C1ORF109	0.151	NA	NA	NA
C1orf111	NA	NA	0.0313673	NA
C1orf112	NA	-0.0772718	-0.0591588	-0.343324
C1ORF112	-0.019	NA	NA	NA
C1orf115	NA	0.0619726	0.0984749	-0.0145212
C1ORF115	-0.024	NA	NA	NA
[truncated: 16,599 more rows]

## Sheet: mir155_KO
Gene expression or mRNA stability and translational efficiency (RPF) changes following miR-155 knockout in 4 mouse immune cell types
Mouse gene	Mouse Refseq ID	Human one-to-one ortholog	B.cell.RPF.log2FC	T.cell.array.log2FC	Th1.cell.array.log2FC	Th2.cell.array.log2FC
0610007P14Rik	NM_021446	C14orf1	-0.777931	-0.643345	-0.115656	-0.0610362
0610009O20Rik	NM_024179	KIAA0141	-0.794095	0.110024	NA	NA
0610037L13Rik	NM_001347160	C1orf123	0.12172	-0.100823	0.116991	-0.0867239
0610037L13Rik	NM_028754	C1orf123	0.12172	-0.100823	0.116991	-0.0867239
1110004E09Rik	NM_026502	AP000275.65	0.266532	-0.373112	-0.036866	-0.0381096
1110004F10Rik	NM_019772	C11orf58	NA	-0.30741	0.0508063	0.152387
1110008F13Rik	NM_026124	TGIF2-C20orf24	NA	-0.305556	-0.0113431	0.121837
1110008P14Rik	NM_198001	C9orf16	NA	-0.428158	-0.215349	0.527582
1110032A03Rik	NM_023483	C11orf1	NA	0.560701	NA	NA
1110032A03Rik	NM_001311073	C11orf1	NA	0.560701	NA	NA
1110037F02Rik	NM_001347055	KIAA1429	0.023079	0.0706186	0.104835	-0.138224
1110037F02Rik	NM_001081183	KIAA1429	0.023079	0.0706186	0.104835	-0.138224
1110038F14Rik	NM_001347540	C8orf33	NA	-0.15857	0.0670234	-0.0587052
1110038F14Rik	NM_054099	C8orf33	NA	-0.15857	0.0670234	-0.0587052
1110051M20Rik	NM_175123	C11orf49	NA	-0.109596	NA	NA
1110051M20Rik	NM_001311144	C11orf49	NA	-0.109596	NA	NA
1110059E24Rik	NM_025423	C9orf85	NA	0.130068	-0.107483	0.0383881
1110059G10Rik	NM_025419	KIAA1143	NA	-0.120121	-0.0800064	-0.244423
1190002N15Rik	NM_001033145	C3orf58	NA	-0.503568	-0.158358	-0.323627
1600012H06Rik	NM_001083881	C6orf120	NA	0.32318	-0.109317	-0.0744727
1600012H06Rik	NM_001083880	C6orf120	NA	0.32318	-0.109317	-0.0744727
1600012H06Rik	NM_001083882	C6orf120	NA	0.32318	-0.109317	-0.0744727
1600012H06Rik	NM_026451	C6orf120	NA	0.32318	-0.109317	-0.0744727
1700010I14Rik	NM_025851	C6orf118	NA	0.412086	NA	NA
1700010I14Rik	NM_001347544	C6orf118	NA	0.412086	NA	NA
1700017B05Rik	NM_028820	C15orf39	0.200062	-0.200663	0.0362192	0.122188
1700021F05Rik	NM_026411	C6orf203	NA	-0.350663	0.428684	0.0484823
1700030K09Rik	NM_028170	C19orf44	NA	-0.221144	0.0619575	-0.0933119
1700037H04Rik	NM_001311138	C20orf27	0.228768	-0.101365	-0.109057	NA
1700037H04Rik	NM_026091	C20orf27	0.228768	-0.101365	-0.109057	NA
1700123O20Rik	NM_021437	C14orf119	NA	0.0969283	-0.246823	-0.262186
1810013L24Rik	NM_001081400	C16orf72	0.358979	NA	NA	NA
1810030O07Rik	NM_175141	CXorf38	0.103034	0.167032	-0.0660027	-0.00869543
1810037I17Rik	NM_024461	C4orf3	NA	NA	-0.00784577	0.0576119
1810043G02Rik	NM_026431	C21orf2	NA	-0.0924646	NA	NA
1810055G02Rik	NM_028077	C11orf24	NA	-0.0449442	0.029692	0.100883
2010107E04Rik	NM_027360	C14orf2	0.381869	0.0743927	0.477372	0.239177
2010107G23Rik	NM_027251	C10orf35	NA	0.121763	NA	NA
2210016F16Rik	NM_027335	C9orf64	NA	-0.439041	0.0100647	0.178823
2210016L21Rik	NM_028211	C12orf43	NA	-0.123166	-0.0548652	-0.101899
2310011J03Rik	NM_025521	C19orf25	NA	-0.468609	0.0221405	0.342624
2310022A10Rik	NM_175107	C19orf47	0.169103	-0.125339	-0.293532	0.19112
2310022A10Rik	NM_001122767	C19orf47	0.169103	-0.125339	-0.293532	0.19112
2310033P09Rik	NM_024210	C1orf35	NA	-0.230431	0.26556	0.547283
2310035C23Rik	NM_029349	KIAA1468	-0.120475	NA	NA	NA
2310035C23Rik	NM_173187	KIAA1468	-0.120475	NA	NA	NA
2310036O22Rik	NM_026760	C19orf43	NA	-0.115727	-0.100067	0.198958
2310039H08Rik	NM_025966	C6orf226	NA	-0.0905083	-0.435391	-0.193521
2310061I04Rik	NM_001033630	C6orf136	NA	-0.632418	0.0612216	0.0639665
2410004B18Rik	NM_025555	C1orf52	NA	-0.241339	-0.243065	-0.330897
2410015M20Rik	NM_153152	C19orf70	-0.0659017	-0.125985	0.115067	0.162304
2510039O18Rik	NM_029841	KIAA2013	-0.374178	0.201268	-0.304368	0.752337
2610020H08Rik	NM_028129	AC004381.6	NA	-0.230509	NA	NA
2610020H08Rik	NM_001004187	AC004381.6	NA	-0.230509	NA	NA
2610301B20Rik	NM_026005	C8orf37	NA	-0.187243	-0.24355	-0.242213
2610507B11Rik	NM_001002004	KIAA0100	0.0503942	-0.528763	0.391601	-0.139612
2700049A03Rik	NM_029818	KIAA0586	0.314767	NA	NA	NA
2700049A03Rik	NM_001163378	KIAA0586	0.314767	NA	NA	NA
2700060E02Rik	NM_026528	C14orf166	-0.45418	-0.0657292	-0.0171168	-0.122393
2700062C07Rik	NM_026529	C18orf21	NA	-0.144455	0.104866	-0.354911
2810004N23Rik	NM_025615	C1orf131	NA	-0.684609	0.144266	-0.15259
2810403A07Rik	NM_028814	KIAA0907	-0.0163414	0.31972	0.0482287	-0.342222
2810428I15Rik	NM_025577	C19orf60	-0.191327	-0.283753	0.102628	0.698877
2810474O19Rik	NM_001289662	KIAA1551	0.0673196	1.09141	-0.00790377	-0.504996
2810474O19Rik	NM_001289661	KIAA1551	0.0673196	1.09141	-0.00790377	-0.504996
2810474O19Rik	NM_026054	KIAA1551	0.0673196	1.09141	-0.00790377	-0.504996
3110002H16Rik	NM_029623	C18orf8	-0.264863	0.44461	0.0497778	0.141698
3110009E18Rik	NM_028439	C2orf76	NA	0.145881	-0.343607	-0.099408
3110009E18Rik	NM_001172074	C2orf76	NA	0.145881	-0.343607	-0.099408
3110040N11Rik	NM_026077	C15orf40	-0.192624	-0.0595844	-0.0421221	-0.206603
3110043O21Rik	NM_001081343	C9orf72	0.322496	-0.250907	1.00354	0.00609145
3830406C13Rik	NM_001284383	C3orf14	NA	-0.0403899	-0.275357	0.11042
3830406C13Rik	NM_001284387	C3orf14	NA	-0.0403899	-0.275357	0.11042
3830406C13Rik	NM_001284386	C3orf14	NA	-0.0403899	-0.275357	0.11042
3830406C13Rik	NM_001284385	C3orf14	NA	-0.0403899	-0.275357	0.11042
3830406C13Rik	NM_178141	C3orf14	NA	-0.0403899	-0.275357	0.11042
3830406C13Rik	NM_146051	C3orf14	NA	-0.0403899	-0.275357	0.11042
3830406C13Rik	NM_001284384	C3orf14	NA	-0.0403899	-0.275357	0.11042
4833420G17Rik	NM_001113550	C5orf34	NA	0.448346	0.189819	0.00658212
4833420G17Rik	NM_026127	C5orf34	NA	0.448346	0.189819	0.00658212
4833439L19Rik	NM_001252646	KIAA1191	NA	NA	0.0403981	0.2339
4833439L19Rik	NM_001252647	KIAA1191	NA	NA	0.0403981	0.2339
4833439L19Rik	NM_001252648	KIAA1191	NA	NA	0.0403981	0.2339
4833439L19Rik	NM_001252645	KIAA1191	NA	NA	0.0403981	0.2339
4833439L19Rik	NM_133797	KIAA1191	NA	NA	0.0403981	0.2339
4930427A07Rik	NM_134041	C14orf80	NA	-0.18865	NA	NA
4930430F08Rik	NM_175128	C12orf29	NA	0.219342	NA	NA
4930453N24Rik	NM_026273	C3orf38	NA	0.00525603	NA	NA
4931406C07Rik	NM_001199484	C11orf54	NA	0.178422	0.178154	0.98166
4931406C07Rik	NM_001199485	C11orf54	NA	0.178422	0.178154	0.98166
4931406C07Rik	NM_133732	C11orf54	NA	0.178422	0.178154	0.98166
4931406P16Rik	NM_172741	KIAA0355	0.329402	NA	NA	NA
4932438A13Rik	NM_172679	KIAA1109	0.0323338	0.789638	-0.262865	-0.148565
4933434E20Rik	NM_001287086	C1orf43	NA	NA	-0.0361096	-0.211598
4933434E20Rik	NM_001287087	C1orf43	NA	NA	-0.0361096	-0.211598
4933434E20Rik	NM_027500	C1orf43	NA	NA	-0.0361096	-0.211598
4933434E20Rik	NM_025762	C1orf43	NA	NA	-0.0361096	-0.211598
5031439G07Rik	NM_001033273	KIAA0930	NA	-0.064936	NA	NA
6030458C11Rik	NM_029998	C5orf22	NA	-0.397665	0.103902	-0.255142
6030458C11Rik	NM_001166360	C5orf22	NA	-0.397665	0.103902	-0.255142
6330408A02Rik	NM_177312	C19orf68	NA	-0.263105	NA	NA
8030462N17Rik	NM_178670	C18orf25	-0.171085	NA	NA	NA
9030617O03Rik	NM_145448	C14orf159	-0.573799	0.402996	-0.200208	0.467018
9030624J02Rik	NM_027815	C16orf62	-0.169882	-0.0354285	-0.112407	0.211523
9130011E15Rik	NM_198296	C10orf76	0.366423	NA	NA	NA
9430015G10Rik	NM_177205	C1orf159	NA	-0.326149	0.0799603	0.271225
9430015G10Rik	NM_145557	C1orf159	NA	-0.326149	0.0799603	0.271225
9530068E07Rik	NM_153117	C5orf15	-0.240502	-0.0061794	0.0197877	-0.102297
a	NM_015770	ASIP	NA	0.420973	NA	NA
A230050P20Rik	NM_175687	C19orf66	NA	0.0960016	-0.198853	0.254002
A430005L14Rik	NM_175287	C1orf174	NA	-0.668608	0.0580569	0.255411
A430005L14Rik	NM_001163019	C1orf174	NA	-0.668608	0.0580569	0.255411
A530016L24Rik	NM_177039	C14orf180	NA	-0.196516	NA	NA
A830080D01Rik	NM_001033472	CXorf23	0.14641	NA	NA	NA
Aaas	NM_153416	AAAS	-0.0963691	-0.186736	-0.0781894	0.101373
Aacs	NM_030210	AACS	-0.435585	-0.379084	0.0299241	0.0402905
Aaed1	NM_025370	AAED1	NA	0.875472	NA	NA
Aagab	NM_025857	AAGAB	-0.847253	-0.202412	-0.0831382	-0.110199
Aak1	NM_177762	AAK1	NA	-0.0138456	NA	NA
Aak1	NM_001040106	AAK1	NA	-0.0138456	NA	NA
Aamdc	NM_001177947	AAMDC	NA	-0.117191	-0.437448	1.00474
Aamdc	NM_183251	AAMDC	NA	-0.117191	-0.437448	1.00474
Aamdc	NM_001177946	AAMDC	NA	-0.117191	-0.437448	1.00474
Aamdc	NM_001177945	AAMDC	NA	-0.117191	-0.437448	1.00474
Aamp	NM_146110	AAMP	-0.00252638	0.173106	-0.0242722	0.505914
Aamp	NM_001190444	AAMP	-0.00252638	0.173106	-0.0242722	0.505914
Aar2	NM_001164818	AAR2	NA	0.0323143	NA	NA
Aar2	NM_026661	AAR2	NA	0.0323143	NA	NA
Aard	NM_175503	AARD	NA	NA	NA	1.04037
Aars	NM_146217	AARS	-0.0809575	-0.434614	-0.0427618	0.271111
Aarsd1	NM_144829	AARSD1	0.230105	NA	0.444904	0.295438
Aasdhppt	NM_001326359	AASDHPPT	-0.321113	NA	NA	NA
Aasdhppt	NR_136941	AASDHPPT	-0.321113	NA	NA	NA
Aasdhppt	NR_136940	AASDHPPT	-0.321113	NA	NA	NA
Aasdhppt	NM_026276	AASDHPPT	-0.321113	NA	NA	NA
Aatf	NM_019816	AATF	-0.0887175	-0.708095	0.28635	0.256816
Abca1	NM_013454	ABCA1	0.928907	NA	NA	NA
Abca2	NM_007379	ABCA2	-0.856432	0.0975888	0.103944	NA
Abca3	NM_001039581	ABCA3	-0.036837	-0.0126605	0.08259	NA
Abca3	NM_013855	ABCA3	-0.036837	-0.0126605	0.08259	NA
Abca5	NM_147219	ABCA5	-0.704441	NA	NA	NA
Abca7	NM_013850	ABCA7	-0.0742278	0.172623	0.0935371	NA
Abca7	NM_001347081	ABCA7	-0.0742278	0.172623	0.0935371	NA
Abcb10	NM_019552	ABCB10	NA	0.0325534	NA	NA
Abcb4	NM_008830	ABCB4	NA	0.213843	NA	NA
Abcb6	NM_023732	ABCB6	NA	-0.376817	-0.168019	-0.37554
Abcb7	NM_009592	ABCB7	-0.164594	-0.370526	0.0696328	-0.2631
Abcb8	NM_029020	ABCB8	NA	0.112741	0.476	0.235509
Abcb9	NM_019875	ABCB9	NA	0.651363	-1.05576	NA
Abcc10	NM_001347396	ABCC10	NA	0.108715	NA	NA
Abcc10	NM_170680	ABCC10	NA	0.108715	NA	NA
Abcc10	NM_145140	ABCC10	NA	0.108715	NA	NA
Abcc2	NM_013806	ABCC2	NA	0.00495206	NA	NA
Abcc5	NM_013790	ABCC5	NA	-0.133239	NA	NA
Abcc5	NM_176839	ABCC5	NA	-0.133239	NA	NA
Abcd1	NM_007435	ABCD1	NA	-0.123598	-0.202596	0.499482
Abcd3	NM_008991	ABCD3	-0.174324	-0.606687	0.404223	0.0355434
Abcd4	NM_008992	ABCD4	NA	-0.0359888	NA	NA
Abce1	NM_015751	ABCE1	-0.226632	-0.70084	0.0892037	-0.257529
Abcf1	NM_013854	ABCF1	-0.387639	-0.352056	0.143869	-0.134929
Abcf2	NM_013853	ABCF2	0.167582	-0.468557	0.118784	0.0784376
Abcf2	NM_001190443	ABCF2	0.167582	-0.468557	0.118784	0.0784376
Abcf3	NM_013852	ABCF3	-0.339094	0.0776883	NA	NA
Abcg1	NM_009593	ABCG1	-0.139541	-0.269665	-0.179566	0.158496
Abhd10	NR_073572	ABHD10	NA	-0.244323	-0.231309	0.102985
Abhd10	NM_172511	ABHD10	NA	-0.244323	-0.231309	0.102985
Abhd10	NM_001272070	ABHD10	NA	-0.244323	-0.231309	0.102985
Abhd12	NM_024465	ABHD12	-0.281479	-0.113969	0.129821	0.661358
Abhd14a	NM_001110272	ABHD14A	NA	0.111934	0.107878	0.048625
Abhd14a	NM_145919	ABHD14A	NA	0.111934	0.107878	0.048625
Abhd14a	NM_001110271	ABHD14A	NA	0.111934	0.107878	0.048625
Abhd14b	NM_029631	ABHD14B	NA	0.802611	NA	NA
Abhd16a	NM_178592	ABHD16A	NA	0.695884	1.36959	1.76332
Abhd17a	NM_145421	ABHD17A	NA	-0.264744	0.152859	0.757548
Abhd17b	NM_146096	ABHD17B	0.166179	NA	NA	NA
Abhd17c	NM_133722	ABHD17C	NA	0.10446	0.436652	0.0860082
Abhd18	NM_026622	ABHD18	NA	-0.0550599	NA	NA
Abhd2	NM_018811	ABHD2	-0.083135	0.114767	NA	NA
Abhd4	NM_134076	ABHD4	NA	0.17315	-0.145871	-0.132692
Abhd4	NM_001205181	ABHD4	NA	0.17315	-0.145871	-0.132692
Abhd5	NM_026179	ABHD5	NA	-0.0661395	-0.0226097	0.0370915
Abhd6	NM_001331065	ABHD6	NA	0.38572	NA	NA
Abhd6	NM_001331064	ABHD6	NA	0.38572	NA	NA
Abhd6	NM_025341	ABHD6	NA	0.38572	NA	NA
Abhd8	NM_022419	ABHD8	NA	-0.200313	-0.50941	NA
Abi1	NM_001331044	ABI1	0.116293	0.288501	-0.130749	-0.126913
Abi1	NM_001077192	ABI1	0.116293	0.288501	-0.130749	-0.126913
Abi1	NM_145994	ABI1	0.116293	0.288501	-0.130749	-0.126913
Abi1	NM_001331045	ABI1	0.116293	0.288501	-0.130749	-0.126913
Abi1	NM_001331043	ABI1	0.116293	0.288501	-0.130749	-0.126913
Abi1	NM_001077190	ABI1	0.116293	0.288501	-0.130749	-0.126913
Abi1	NM_001077193	ABI1	0.116293	0.288501	-0.130749	-0.126913
Abi1	NM_007380	ABI1	0.116293	0.288501	-0.130749	-0.126913
Abi3	NM_001163464	ABI3	-0.633872	NA	NA	NA
Abi3	NM_025659	ABI3	-0.633872	NA	NA	NA
Abl1	NM_009594	ABL1	-0.108147	-0.0031258	0.352515	0.177546
Abl1	NM_001283046	ABL1	-0.108147	-0.0031258	0.352515	0.177546
Abl1	NM_001112703	ABL1	-0.108147	-0.0031258	0.352515	0.177546
Abl1	NM_001283045	ABL1	-0.108147	-0.0031258	0.352515	0.177546
Abl1	NM_001283047	ABL1	-0.108147	-0.0031258	0.352515	0.177546
Abl2	NM_001136104	ABL2	-0.890734	NA	NA	NA
Abl2	NM_009595	ABL2	-0.890734	NA	NA	NA
Ablim1	NM_001290816	ABLIM1	-0.430602	0.558601	-0.214909	-0.304697
Ablim1	NM_001290813	ABLIM1	-0.430602	0.558601	-0.214909	-0.304697
Ablim1	NM_001290815	ABLIM1	-0.430602	0.558601	-0.214909	-0.304697
Ablim1	NM_178688	ABLIM1	-0.430602	0.558601	-0.214909	-0.304697
Ablim1	NM_001103178	ABLIM1	-0.430602	0.558601	-0.214909	-0.304697
Ablim1	NM_001103177	ABLIM1	-0.430602	0.558601	-0.214909	-0.304697
Ablim1	NM_001347459	ABLIM1	-0.430602	0.558601	-0.214909	-0.304697
Abr	NM_001346670	ABR	NA	0.278244	NA	NA
Abr	NM_001291186	ABR	NA	0.278244	NA	NA
Abr	NM_198018	ABR	NA	0.278244	NA	NA
Abr	NM_198895	ABR	NA	0.278244	NA	NA
Abr	NM_198894	ABR	NA	0.278244	NA	NA
Abracl	NM_028440	ABRACL	NA	NA	-0.0778833	-0.0868655
Abt1	NM_013924	ABT1	NA	-0.490861	0.131818	-0.0266644
Abtb1	NM_030251	ABTB1	NA	1.52407	NA	NA
Abtb2	NM_178890	ABTB2	0.534498	NA	NA	NA
Acaa2	NM_177470	ACAA2	NA	-0.268021	0.254289	0.467428
Acaca	NM_133360	ACACA	-0.18563	NA	NA	NA
Acad11	NM_175324	ACAD11	NA	0.14008	-0.331091	-0.203367
Acad8	NM_025862	ACAD8	NA	-0.274518	NA	NA
Acad9	NM_172678	ACAD9	-0.369134	-0.391281	0.0297405	-0.120698
Acadl	NM_007381	ACADL	-0.0638491	0.0934901	-0.344643	0.0345973
Acadm	NM_007382	ACADM	NA	0.212662	-0.116898	0.0573501
Acads	NM_007383	ACADS	-0.378725	0.0628971	0.307623	NA
Acadsb	NM_025826	ACADSB	NA	0.089357	-0.126474	-0.037322
Acadvl	NM_017366	ACADVL	-0.263365	0.0074468	0.0118598	0.389119
Acap1	NM_153788	ACAP1	-0.231005	NA	NA	NA
Acap2	NM_030138	ACAP2	0.197288	NA	NA	NA
Acat1	NM_144784	ACAT1	-0.369071	-0.512991	-0.119438	-0.00585938
Acbd3	NM_133225	ACBD3	0.284017	0.342419	-0.0924559	0.133027
Acbd5	NM_001102437	ACBD5	0.22345	NA	NA	NA
Acbd5	NM_028793	ACBD5	0.22345	NA	NA	NA
Acbd5	NM_001102438	ACBD5	0.22345	NA	NA	NA
Acbd5	NM_001102436	ACBD5	0.22345	NA	NA	NA
Acbd6	NM_028250	ACBD6	-0.334918	0.07206	0.152598	-0.153662
Acbd6	NM_026683	ACBD6	-0.334918	0.07206	0.152598	-0.153662
Acbd6	NM_001145781	ACBD6	-0.334918	0.07206	0.152598	-0.153662
Acd	NR_145825	ACD	-0.314817	0.0476678	-0.189073	0.461973
Acd	NM_001348349	ACD	-0.314817	0.0476678	-0.189073	0.461973
Acd	NR_145824	ACD	-0.314817	0.0476678	-0.189073	0.461973
Acd	NM_001012638	ACD	-0.314817	0.0476678	-0.189073	0.461973
Acer2	NM_139306	ACER2	NA	-0.0264122	NA	NA
Acer2	NM_001290543	ACER2	NA	-0.0264122	NA	NA
Acer2	NM_001290541	ACER2	NA	-0.0264122	NA	NA
Acin1	NM_019567	ACIN1	-0.03728	0.213894	0.0199913	-0.0975204
Acin1	NM_001085472	ACIN1	-0.03728	0.213894	0.0199913	-0.0975204
Acin1	NM_001242606	ACIN1	-0.03728	0.213894	0.0199913	-0.0975204
Acin1	NM_023190	ACIN1	-0.03728	0.213894	0.0199913	-0.0975204
Acin1	NM_001242605	ACIN1	-0.03728	0.213894	0.0199913	-0.0975204
Acin1	NM_001085473	ACIN1	-0.03728	0.213894	0.0199913	-0.0975204
Acly	NM_134037	ACLY	-0.160175	-0.0461341	0.100053	0.0699467
Acly	NM_001199296	ACLY	-0.160175	-0.0461341	0.100053	0.0699467
Aco1	NM_007386	ACO1	-0.37556	-0.395534	-0.373719	0.0833894
Aco2	NM_080633	ACO2	-0.151265	-0.301008	0.00537725	0.311794
Acod1	NM_008392	ACOD1	1.53195	NA	NA	NA
Acot13	NM_025790	ACOT13	-0.250029	0.324652	0.0832599	0.278803
Acot7	NM_001146058	ACOT7	-0.842291	-0.512682	0.0762287	0.643924
Acot7	NM_133348	ACOT7	-0.842291	-0.512682	0.0762287	0.643924
Acot7	NM_001146057	ACOT7	-0.842291	-0.512682	0.0762287	0.643924
Acot8	NM_133240	ACOT8	NA	-0.0703517	-0.0274807	-0.219548
Acox1	NM_015729	ACOX1	-0.420166	0.248009	-0.391539	0.00401848
Acox1	NM_001271898	ACOX1	-0.420166	0.248009	-0.391539	0.00401848
Acox3	NM_030721	ACOX3	-0.0211641	NA	NA	NA
Acp1	NM_001110239	ACP1	NA	NA	0.0718693	-0.189668
Acp1	NM_021330	ACP1	NA	NA	0.0718693	-0.189668
Acp2	NM_007387	ACP2	NA	-0.120798	-0.131724	0.032366
Acp5	NM_007388	ACP5	NA	0.837452	-0.163624	0.77999
Acp5	NM_001102404	ACP5	NA	0.837452	-0.163624	0.77999
Acp5	NM_001102405	ACP5	NA	0.837452	-0.163624	0.77999
Acp6	NM_019800	ACP6	NA	0.33816	-0.18817	0.491969
Acrbp	NM_016845	ACRBP	NA	0.594632	NA	NA
Acrbp	NM_001127340	ACRBP	NA	0.594632	NA	NA
Acsbg1	NM_053178	ACSBG1	NA	0.811013	NA	NA
Acsf2	NM_153807	ACSF2	NA	-0.160728	NA	NA
Acsf3	NM_144932	ACSF3	NA	-0.269775	0.249439	NA
Acsl1	NM_001302163	ACSL1	0.14944	-0.246837	0.513825	NA
Acsl1	NM_007981	ACSL1	0.14944	-0.246837	0.513825	NA
Acsl3	NM_028817	ACSL3	0.21089	NA	NA	NA
Acsl3	NM_001033606	ACSL3	0.21089	NA	NA	NA
Acsl3	NM_001136222	ACSL3	0.21089	NA	NA	NA
Acsl4	NM_207625	ACSL4	0.175338	-0.0364318	-0.355932	0.157361
Acsl4	NM_019477	ACSL4	0.175338	-0.0364318	-0.355932	0.157361
Acsl4	NM_001033600	ACSL4	0.175338	-0.0364318	-0.355932	0.157361
Acsl5	NM_027976	ACSL5	-0.642622	-0.447871	0.0105817	0.0257426
Acss1	NM_080575	ACSS1	-0.645462	NA	NA	NA
Acss2	NM_019811	ACSS2	NA	-0.0039694	NA	1.52337
Acta1	NM_009606	ACTA1	NA	-0.0282508	NA	NA
Acta1	NM_001272041	ACTA1	NA	-0.0282508	NA	NA
Actb	NM_007393	ACTB	0.0100387	0.089251	-0.0046755	0.146773
Actg1	NM_001313923	ACTG1	NA	0.0744714	-0.0149114	-0.0279531
Actg1	NM_009609	ACTG1	NA	0.0744714	-0.0149114	-0.0279531
Actl6a	NM_019673	ACTL6A	-0.19323	-0.572295	-0.0639731	0.0259559
Actn1	NM_134156	ACTN1	0.0581708	-0.385094	NA	NA
Actn1	NM_001346669	ACTN1	0.0581708	-0.385094	NA	NA
Actn4	NM_021895	ACTN4	-0.369875	-0.0902051	0.0645558	0.198044
Actr10	NM_019785	ACTR10	-0.188682	0.163977	0.122728	0.0748707
Actr1a	NM_016860	ACTR1A	-0.337199	0.233053	0.0277334	0.200431
Actr1b	NM_146107	ACTR1B	-0.721152	-0.102908	0.0237176	-0.0431238
Actr2	NM_146243	ACTR2	-0.237813	-0.0930524	-0.00937455	-0.342144
Actr3	NM_001205386	ACTR3	-0.33141	0.149165	-0.11026	-0.0821573
Actr3	NM_023735	ACTR3	-0.33141	0.149165	-0.11026	-0.0821573
Actr3	NM_001205385	ACTR3	-0.33141	0.149165	-0.11026	-0.0821573
Actr5	NM_175419	ACTR5	-0.253194	NA	NA	NA
Actr6	NM_025914	ACTR6	NA	-0.293137	-0.216844	-0.29683
Actr8	NM_027493	ACTR8	-0.184102	0.228446	0.0177163	-0.000255874
Acvr1b	NM_007395	ACVR1B	NA	0.0257159	NA	NA
Acvr2a	NM_007396	ACVR2A	NA	0.292251	NA	NA
Acvrl1	NM_001277257	ACVRL1	NA	0.715688	NA	NA
Acvrl1	NM_001277255	ACVRL1	NA	0.715688	NA	NA
Acvrl1	NM_001277259	ACVRL1	NA	0.715688	NA	NA
Acvrl1	NM_001277258	ACVRL1	NA	0.715688	NA	NA
Acvrl1	NM_009612	ACVRL1	NA	0.715688	NA	NA
Acyp1	NM_025421	ACYP1	NA	-0.319739	-0.360396	0.0414713
Acyp2	NM_029344	ACYP2	NA	-0.0373011	0.817139	0.533095
Ada	NM_007398	ADA	NA	-0.920351	0.314876	-0.647432
Ada	NM_001272052	ADA	NA	-0.920351	0.314876	-0.647432
Adam10	NM_007399	ADAM10	0.364847	-0.195485	0.453141	0.446296
Adam17	NM_001277266	ADAM17	0.0471772	-0.0101151	-0.0363719	0.128925
Adam17	NR_102380	ADAM17	0.0471772	-0.0101151	-0.0363719	0.128925
Adam17	NM_001291871	ADAM17	0.0471772	-0.0101151	-0.0363719	0.128925
Adam17	NR_120376	ADAM17	0.0471772	-0.0101151	-0.0363719	0.128925
Adam17	NM_009615	ADAM17	0.0471772	-0.0101151	-0.0363719	0.128925
Adam19	NM_001291891	ADAM19	-0.192159	-0.00126518	NA	NA
Adam19	NM_009616	ADAM19	-0.192159	-0.00126518	NA	NA
Adam19	NM_001291890	ADAM19	-0.192159	-0.00126518	NA	NA
Adam19	NM_001311209	ADAM19	-0.192159	-0.00126518	NA	NA
Adam8	NM_001291066	ADAM8	NA	3.79474	0.307676	1.91053
Adam8	NM_007403	ADAM8	NA	3.79474	0.307676	1.91053
Adam9	NM_001270996	ADAM9	-0.00766988	0.53903	-0.257896	-0.602085
Adam9	NM_007404	ADAM9	-0.00766988	0.53903	-0.257896	-0.602085
Adamts10	NM_172619	ADAMTS10	NA	0.413365	NA	NA
Adamts10	NR_137628	ADAMTS10	NA	0.413365	NA	NA
Adamts10	NR_137626	ADAMTS10	NA	0.413365	NA	NA
Adamts10	NR_137629	ADAMTS10	NA	0.413365	NA	NA
Adamts10	NR_137627	ADAMTS10	NA	0.413365	NA	NA
Adamts10	NM_001329147	ADAMTS10	NA	0.413365	NA	NA
Adamts10	NM_001329153	ADAMTS10	NA	0.413365	NA	NA
Adamts10	NM_001329151	ADAMTS10	NA	0.413365	NA	NA
Adamts10	NM_001329202	ADAMTS10	NA	0.413365	NA	NA
Adamts10	NM_001329143	ADAMTS10	NA	0.413365	NA	NA
Adamts10	NM_001329154	ADAMTS10	NA	0.413365	NA	NA
Adamts10	NM_001329152	ADAMTS10	NA	0.413365	NA	NA
Adamts10	NM_001329203	ADAMTS10	NA	0.413365	NA	NA
Adamtsl4	NM_144899	ADAMTSL4	NA	2.54299	NA	NA
Adamtsl4	NM_001301705	ADAMTSL4	NA	2.54299	NA	NA
Adap1	NM_172723	ADAP1	0.362187	NA	NA	NA
Adar	NM_001146296	ADAR	0.261043	0.0827908	0.00123948	0.215958
Adar	NM_001038587	ADAR	0.261043	0.0827908	0.00123948	0.215958
Adar	NM_019655	ADAR	0.261043	0.0827908	0.00123948	0.215958
Adat1	NM_013925	ADAT1	NA	-0.0127664	NA	NA
Adat2	NM_025748	ADAT2	NA	-0.496646	0.31636	-0.101606
Adck1	NM_028105	ADCK1	NA	-0.0457144	NA	NA
Adck1	NM_001277297	ADCK1	NA	-0.0457144	NA	NA
Adck1	NM_001277296	ADCK1	NA	-0.0457144	NA	NA
Adcy3	NM_001159536	ADCY3	NA	-0.114723	NA	NA
Adcy3	NM_138305	ADCY3	NA	-0.114723	NA	NA
Adcy3	NM_001159537	ADCY3	NA	-0.114723	NA	NA
Adcy6	NM_007405	ADCY6	NA	0.228261	NA	NA
Adcy7	NM_001109756	ADCY7	NA	0.289108	-0.277218	-0.0267282
Adcy7	NM_007406	ADCY7	NA	0.289108	-0.277218	-0.0267282
Adcy7	NM_001037724	ADCY7	NA	0.289108	-0.277218	-0.0267282
Adcy7	NM_001037723	ADCY7	NA	0.289108	-0.277218	-0.0267282
Add1	NM_001331084	ADD1	0.0712953	0.26676	-0.14897	0.891111
Add1	NM_001102444	ADD1	0.0712953	0.26676	-0.14897	0.891111
Add1	NM_001024458	ADD1	0.0712953	0.26676	-0.14897	0.891111
Add1	NM_001331085	ADD1	0.0712953	0.26676	-0.14897	0.891111
Add1	NM_013457	ADD1	0.0712953	0.26676	-0.14897	0.891111
Add1	NM_001331081	ADD1	0.0712953	0.26676	-0.14897	0.891111
Add1	NM_001331082	ADD1	0.0712953	0.26676	-0.14897	0.891111
Add1	NM_001331087	ADD1	0.0712953	0.26676	-0.14897	0.891111
Add1	NM_001331086	ADD1	0.0712953	0.26676	-0.14897	0.891111
Add1	NM_001331080	ADD1	0.0712953	0.26676	-0.14897	0.891111
Add1	NM_001331083	ADD1	0.0712953	0.26676	-0.14897	0.891111
Add3	NM_001164100	ADD3	0.516218	0.143325	0.18502	-0.310274
Add3	NM_001164101	ADD3	0.516218	0.143325	0.18502	-0.310274
Add3	NM_013758	ADD3	0.516218	0.143325	0.18502	-0.310274
Add3	NM_001277100	ADD3	0.516218	0.143325	0.18502	-0.310274
Add3	NM_001164099	ADD3	0.516218	0.143325	0.18502	-0.310274
Adgra3	NM_133911	ADGRA3	NA	-0.0384787	NA	NA
Adgrb1	NM_174991	ADGRB1	NA	0.137453	NA	NA
Adgre1	NM_010130	ADGRE1	0.239653	0.321883	NA	NA
Adgre5	NM_001163031	ADGRE5	-0.457554	-0.489264	-0.0120472	0.117991
Adgre5	NM_001163030	ADGRE5	-0.457554	-0.489264	-0.0120472	0.117991
Adgre5	NM_011925	ADGRE5	-0.457554	-0.489264	-0.0120472	0.117991
Adgre5	NM_001163029	ADGRE5	-0.457554	-0.489264	-0.0120472	0.117991
Adgrg1	NM_001198894	ADGRG1	-0.747096	NA	NA	NA
Adgrg1	NM_018882	ADGRG1	-0.747096	NA	NA	NA
Adgrl1	NM_181039	ADGRL1	NA	-0.518233	NA	NA
Adh5	NM_007410	ADH5	-0.629163	-0.328476	-0.0163701	-0.147541
Adh5	NM_001288578	ADH5	-0.629163	-0.328476	-0.0163701	-0.147541
Adi1	NM_134052	ADI1	NA	-0.505648	0.0695397	-0.206751
Adipor1	NM_028320	ADIPOR1	-0.316382	0.220803	-0.0252284	0.0169437
Adipor1	NM_001306069	ADIPOR1	-0.316382	0.220803	-0.0252284	0.0169437
Adipor2	NM_197985	ADIPOR2	-0.319908	0.130234	-0.379879	-0.648391
Adk	NM_134079	ADK	NA	-0.0862631	0.300215	0.265836
Adk	NM_001243041	ADK	NA	-0.0862631	0.300215	0.265836
Adm	NM_009627	ADM	0.326965	0.346714	NA	NA
Adnp	NM_001310088	ADNP	-0.15738	-0.0168603	NA	NA
Adnp	NM_001310086	ADNP	-0.15738	-0.0168603	NA	NA
Adnp	NM_009628	ADNP	-0.15738	-0.0168603	NA	NA
Adnp2	NM_175028	ADNP2	-0.665067	-0.1087	-0.158445	-0.049093
Adora2a	NM_001331095	ADORA2A	0.158146	0.145763	NA	NA
Adora2a	NM_001331096	ADORA2A	0.158146	0.145763	NA	NA
Adora2a	NM_009630	ADORA2A	0.158146	0.145763	NA	NA
Adora2b	NM_007413	ADORA2B	NA	-0.210834	-0.669944	NA
Adpgk	NM_028121	ADPGK	-0.806159	-0.29929	-0.00891137	-0.124599
Adprh	NM_007414	ADPRH	0.117829	0.114173	-0.110661	-0.202191
Adprhl2	NM_133883	ADPRHL2	NA	-0.0755314	0.279784	0.4479
Adprm	NM_025510	ADPRM	-0.402557	0.798403	-0.145966	0.183479
Adrbk1	NM_001290818	GRK2	-0.450199	0.0454819	0.0728403	0.207299
Adrbk1	NM_130863	GRK2	-0.450199	0.0454819	0.0728403	0.207299
Adsl	NM_009634	ADSL	-0.270486	-0.849665	0.115363	-0.223565
Adss	NM_007422	ADSS	-0.531457	-0.037433	0.0201797	-0.0937617
Adssl1	NM_007421	ADSSL1	NA	0.483264	NA	NA
Aebp1	NM_009636	AEBP1	NA	0.0676879	NA	NA
Aebp1	NM_001291857	AEBP1	NA	0.0676879	NA	NA
Aebp2	NM_009637	AEBP2	-0.390135	NA	NA	NA
Aebp2	NM_001309436	AEBP2	-0.390135	NA	NA	NA
Aebp2	NM_178803	AEBP2	-0.390135	NA	NA	NA
Aebp2	NM_001309437	AEBP2	-0.390135	NA	NA	NA
Aebp2	NM_001005605	AEBP2	-0.390135	NA	NA	NA
Aen	NM_026531	AEN	-0.165743	-0.561499	0.155613	-0.644371
Aen	NM_001162939	AEN	-0.165743	-0.561499	0.155613	-0.644371
Aes	NM_010347	AES	-0.384414	0.337786	-0.264093	1.46127
Aes	NR_074087	AES	-0.384414	0.337786	-0.264093	1.46127
Aes	NM_001276288	AES	-0.384414	0.337786	-0.264093	1.46127
Aff1	NM_001080798	AFF1	0.0945953	0.222563	NA	NA
Aff1	NM_133919	AFF1	0.0945953	0.222563	NA	NA
Aff4	NM_033565	AFF4	0.419766	0.563268	0.278055	0.18683
Afg3l2	NM_027130	AFG3L2	-0.309569	0.344022	0.100821	0.257999
Afmid	NM_027827	AFMID	NA	0.164169	NA	NA
Afp	NM_007423	AFP	NA	-0.128023	NA	NA
Aftph	NM_181411	AFTPH	-0.32134	0.161487	0.0246249	-0.044299
Aftph	NM_001252503	AFTPH	-0.32134	0.161487	0.0246249	-0.044299
Aftph	NM_001290545	AFTPH	-0.32134	0.161487	0.0246249	-0.044299
Agap3	NM_139153	AGAP3	NA	-0.017959	0.209353	NA
Agap3	NM_001256431	AGAP3	NA	-0.017959	0.209353	NA
Agbl5	NM_174849	AGBL5	NA	0.26917	NA	NA
Agbl5	NM_001048192	AGBL5	NA	0.26917	NA	NA
Agbl5	NM_001294262	AGBL5	NA	0.26917	NA	NA
Agbl5	NR_122117	AGBL5	NA	0.26917	NA	NA
Agbl5	NR_122116	AGBL5	NA	0.26917	NA	NA
Ager	NM_001271424	AGER	NA	0.230865	NA	NA
Ager	NM_007425	AGER	NA	0.230865	NA	NA
Ager	NR_073173	AGER	NA	0.230865	NA	NA
Ager	NM_001271422	AGER	NA	0.230865	NA	NA
Ager	NM_001271423	AGER	NA	0.230865	NA	NA
Ager	NR_073175	AGER	NA	0.230865	NA	NA
Ager	NR_073176	AGER	NA	0.230865	NA	NA
Agfg1	NM_010472	AGFG1	-0.0525186	-0.292254	-0.015534	-0.442009
Agfg1	NM_001347077	AGFG1	-0.0525186	-0.292254	-0.015534	-0.442009
Agfg1	NM_001310713	AGFG1	-0.0525186	-0.292254	-0.015534	-0.442009
Agfg2	NM_001303266	AGFG2	NA	-0.232985	NA	0.37811
Agfg2	NM_178162	AGFG2	NA	-0.232985	NA	0.37811
Agfg2	NM_001303271	AGFG2	NA	-0.232985	NA	0.37811
Aggf1	NM_025630	AGGF1	0.0359194	-0.0626859	0.147515	-0.312159
Agk	NM_023538	AGK	NA	-0.128396	-0.0295815	-0.136306
Agmat	NM_001081408	AGMAT	NA	-0.0369145	NA	NA
Ago1	NM_001317174	AGO1	-0.744885	NA	NA	NA
Ago1	NM_001317173	AGO1	-0.744885	NA	NA	NA
Ago1	NM_153403	AGO1	-0.744885	NA	NA	NA
Ago2	NM_153178	AGO2	-0.383074	0.580632	-0.000461452	0.283125
Agpat1	NM_001163379	AGPAT1	-0.736336	0.0952898	NA	NA
Agpat1	NM_018862	AGPAT1	-0.736336	0.0952898	NA	NA
Agpat3	NM_053014	AGPAT3	-0.0457801	-0.0470764	0.0309857	0.561256
Agpat4	NM_026644	AGPAT4	-0.158484	NA	NA	NA
Agpat5	NM_026792	AGPAT5	NA	-0.405291	NA	-0.776838
Agps	NM_172666	AGPS	-0.610007	NA	NA	NA
Agrn	NM_021604	AGRN	-0.444873	0.121853	NA	NA
Agtpbp1	NM_001284221	AGTPBP1	NA	-0.0573208	0.153197	-0.0855769
Agtpbp1	NM_001284218	AGTPBP1	NA	-0.0573208	0.153197	-0.0855769
Agtpbp1	NM_023328	AGTPBP1	NA	-0.0573208	0.153197	-0.0855769
Agtpbp1	NM_001048008	AGTPBP1	NA	-0.0573208	0.153197	-0.0855769
Agtpbp1	NM_001284219	AGTPBP1	NA	-0.0573208	0.153197	-0.0855769
Agtrap	NM_009642	AGTRAP	NA	0.0821926	NA	NA
Agtrap	NM_001301281	AGTRAP	NA	0.0821926	NA	NA
Ahctf1	NM_026375	AHCTF1	-0.19572	-0.527912	0.14904	-0.468211
Ahcyl1	NM_145542	AHCYL1	-0.0177403	-0.171408	0.175501	0.18253
Ahcyl2	NM_001171000	AHCYL2	0.240475	0.0179457	0.0305745	0.107706
Ahcyl2	NM_001347084	AHCYL2	0.240475	0.0179457	0.0305745	0.107706
Ahcyl2	NM_001171001	AHCYL2	0.240475	0.0179457	0.0305745	0.107706
Ahcyl2	NM_021414	AHCYL2	0.240475	0.0179457	0.0305745	0.107706
Ahdc1	NM_146155	AHDC1	-0.328295	NA	NA	NA
Ahi1	NM_026203	AHI1	NA	-0.0792132	-0.0504741	0.0841904
Ahi1	NM_001177776	AHI1	NA	-0.0792132	-0.0504741	0.0841904
Ahnak	NM_001286518	AHNAK	NA	0.530887	NA	NA
Ahnak	NM_001039959	AHNAK	NA	0.530887	NA	NA
Ahnak	NM_009643	AHNAK	NA	0.530887	NA	NA
Ahnak	NR_104460	AHNAK	NA	0.530887	NA	NA
Ahsa1	NM_146036	AHSA1	-0.330589	-0.696045	0.0956934	-0.017447
Ahsa2	NM_001290654	AHSA2	-0.796179	-0.608471	0.0703099	-0.219674
Ahsa2	NM_001290655	AHSA2	-0.796179	-0.608471	0.0703099	-0.219674
Ahsa2	NM_172391	AHSA2	-0.796179	-0.608471	0.0703099	-0.219674
AI314180	NM_172381	KIAA0368	0.0965402	-0.261155	0.530208	-0.33576
AI597479	NM_133818	C2orf49	NA	-0.254758	0.0290851	-0.232646
AI837181	NM_001256515	C11orf68	0.110999	0.262873	-0.0817229	0.0074688
AI837181	NM_134149	C11orf68	0.110999	0.262873	-0.0817229	0.0074688
AI846148	NM_001167831	C11orf84	0.129968	NA	NA	NA
AI846148	NM_001033139	C11orf84	0.129968	NA	NA	NA
Aicda	NM_009645	AICDA	NA	1.30748	NA	-0.971219
Aif1	NM_019467	AIF1	NA	0.030744	NA	NA
Aifm1	NM_001290364	AIFM1	-0.448149	-0.48554	0.0299931	-0.202956
Aifm1	NM_012019	AIFM1	-0.448149	-0.48554	0.0299931	-0.202956
Aig1	NM_001347362	AIG1	NA	-0.0221572	NA	0.521895
Aig1	NM_025446	AIG1	NA	-0.0221572	NA	0.521895
Aim1	NM_172393	AIM1	0.0415863	0.686908	-0.157198	0.706446
Aim2	NM_001013779	AIM2	-0.116669	-0.0505525	-0.04036	-0.31878
Aimp1	NM_007926	AIMP1	-0.353384	0.128673	0.0621102	-0.0790611
Aimp2	NM_001172146	AIMP2	NA	-0.390209	0.158862	0.0793837
Aimp2	NM_146165	AIMP2	NA	-0.390209	0.158862	0.0793837
Aip	NM_016666	AIP	-0.418164	0.189038	0.0146626	1.15009
Aip	NM_001276284	AIP	-0.418164	0.189038	0.0146626	1.15009
Aipl1	NM_053245	AIPL1	NA	-0.0455501	NA	NA
Ajuba	NM_010590	AJUBA	NA	0.185119	NA	0.144045
Ak2	NM_001033966	AK2	-0.250171	-0.261393	0.0886702	0.195986
Ak2	NM_016895	AK2	-0.250171	-0.261393	0.0886702	0.195986
Ak2	NR_138540	AK2	-0.250171	-0.261393	0.0886702	0.195986
Ak3	NM_021299	AK3	NA	0.246294	0.154806	0.739596
Ak4	NM_009647	AK4	NA	-0.182488	0.311998	0.218539
Ak4	NM_001177605	AK4	NA	-0.182488	0.311998	0.218539
Ak4	NM_001177602	AK4	NA	-0.182488	0.311998	0.218539
Ak4	NM_001177604	AK4	NA	-0.182488	0.311998	0.218539
Akap1	NR_104310	AKAP1	NA	-0.194399	0.182793	-0.200772
Akap1	NM_009648	AKAP1	NA	-0.194399	0.182793	-0.200772
Akap1	NM_001042541	AKAP1	NA	-0.194399	0.182793	-0.200772
Akap10	NM_019921	AKAP10	-0.114367	-0.129555	-0.0516811	-0.0445731
Akap11	NM_001164503	AKAP11	0.00108497	NA	NA	NA
Akap11	NM_001346784	AKAP11	0.00108497	NA	NA	NA
Akap12	NM_031185	AKAP12	-1.0858	-0.630077	NA	NA
Akap13	NM_029332	AKAP13	0.0814271	NA	NA	NA
Akap8	NR_131219	AKAP8	0.134787	-0.0218705	0.135917	-0.293573
Akap8	NR_131218	AKAP8	0.134787	-0.0218705	0.135917	-0.293573
Akap8	NM_019774	AKAP8	0.134787	-0.0218705	0.135917	-0.293573
Akap8l	NM_017476	AKAP8L	-0.189736	0.785925	0.130363	0.153336
Akap9	NM_194462	AKAP9	-0.0129902	0.377202	0.473676	-0.773408
Akip1	NM_020616	AKIP1	NA	-0.744667	-0.030652	0.061089
Akirin1	NM_023423	AKIRIN1	-0.132729	0.0328786	-0.267042	-0.0306288
Akirin2	NM_001007589	AKIRIN2	-0.0839204	NA	NA	NA
Akna	NM_001305432	AKNA	-0.356512	0.127526	-0.0199824	0.280271
Akna	NM_001045514	AKNA	-0.356512	0.127526	-0.0199824	0.280271
Akr1a1	NM_021473	AKR1A1	-0.0882783	-0.134248	-0.0458101	0.306141
Akr1b3	NM_009658	AKR1B1	NA	-0.805749	0.0809967	-0.290213
Akr1e1	NM_018859	AKR1E2	NA	-0.385289	-0.299102	-0.456305
Akr7a5	NM_025337	AKR7A2	NA	-0.279727	0.126855	0.44916
Akt1	NM_009652	AKT1	-0.354313	-0.167588	-0.100162	-0.0354177
Akt1	NM_001165894	AKT1	-0.354313	-0.167588	-0.100162	-0.0354177
Akt1	NM_001331107	AKT1	-0.354313	-0.167588	-0.100162	-0.0354177
Akt2	NM_007434	AKT2	NA	0.311281	-0.0415716	0.329984
Akt2	NM_001110208	AKT2	NA	0.311281	-0.0415716	0.329984
Akt2	NM_001331109	AKT2	NA	0.311281	-0.0415716	0.329984
Akt2	NM_001331108	AKT2	NA	0.311281	-0.0415716	0.329984
Akt3	NM_011785	AKT3	NA	0.144466	NA	NA
Aktip	NM_001302268	AKTIP	NA	-0.0395241	NA	NA
Aktip	NM_001302266	AKTIP	NA	-0.0395241	NA	NA
Aktip	NM_001302267	AKTIP	NA	-0.0395241	NA	NA
Aktip	NM_001302337	AKTIP	NA	-0.0395241	NA	NA
Aktip	NM_010241	AKTIP	NA	-0.0395241	NA	NA
Alad	NM_001276446	ALAD	-0.147815	-0.515623	0.363297	0.965937
Alad	NM_008525	ALAD	-0.147815	-0.515623	0.363297	0.965937
Alas1	NM_020559	ALAS1	-0.105839	-0.251884	0.0470902	0.186654
Alas1	NM_001291835	ALAS1	-0.105839	-0.251884	0.0470902	0.186654
Alcam	NM_001331110	ALCAM	0.590026	-0.185433	0.597134	-0.518922
Alcam	NM_009655	ALCAM	0.590026	-0.185433	0.597134	-0.518922
Aldh16a1	NM_145954	ALDH16A1	0.423109	-0.229264	0.326115	0.11946
Aldh18a1	NM_153554	ALDH18A1	-0.45265	-0.3523	0.0830556	0.276384
Aldh18a1	NM_019698	ALDH18A1	-0.45265	-0.3523	0.0830556	0.276384
Aldh1b1	NM_028270	ALDH1B1	NA	0.0661217	NA	NA
Aldh3a2	NM_001331114	ALDH3A2	-0.240401	0.188687	-0.203044	-0.71558
Aldh3a2	NM_007437	ALDH3A2	-0.240401	0.188687	-0.203044	-0.71558
Aldh3a2	NR_138545	ALDH3A2	-0.240401	0.188687	-0.203044	-0.71558
Aldh3a2	NM_001331115	ALDH3A2	-0.240401	0.188687	-0.203044	-0.71558
Aldh3b1	NM_026316	ALDH3B1	NA	0.152112	NA	NA
Aldh6a1	NM_134042	ALDH6A1	NA	0.0988224	NA	NA
Aldh6a1	NM_001313967	ALDH6A1	NA	0.0988224	NA	NA
Aldh9a1	NM_019993	ALDH9A1	-0.257443	-0.422834	0.0136759	0.251605
Aldoc	NM_001303423	ALDOC	0.0670411	0.617592	NA	NA
Aldoc	NM_009657	ALDOC	0.0670411	0.617592	NA	NA
Alg12	NM_001142357	ALG12	NA	-0.030678	NA	NA
Alg12	NM_145477	ALG12	NA	-0.030678	NA	NA
Alg14	NM_024178	ALG14	NA	-0.0639894	NA	NA
Alg2	NM_019998	ALG2	NA	0.221704	-0.161988	0.131466
Alg3	NM_145939	ALG3	NA	-0.887937	0.0956059	-0.221647
Alg5	NM_025442	ALG5	-0.0853411	-0.0559674	-0.0919045	0.00751638
Alkbh1	NM_001102565	ALKBH1	0.247118	NA	NA	NA
Alkbh4	NM_001347492	ALKBH4	NA	0.115405	NA	NA
Alkbh4	NM_028070	ALKBH4	NA	0.115405	NA	NA
Alkbh5	NM_172943	ALKBH5	-0.258511	-0.230245	-0.138272	0.0316559
Alkbh8	NM_026303	ALKBH8	0.1525	NA	NA	NA
Alms1	NM_145223	ALMS1	-0.291966	NA	NA	NA
Alpk2	NM_001037294	ALPK2	NA	0.384345	NA	0.515361
Alpl	NM_007431	ALPL	-1.10544	NA	NA	NA
Alpl	NM_001287172	ALPL	-1.10544	NA	NA	NA
Als2	NM_146109	ALS2	-0.125049	0.190533	NA	NA
Als2	NM_028717	ALS2	-0.125049	0.190533	NA	NA
Als2	NM_001159948	ALS2	-0.125049	0.190533	NA	NA
Als2cl	NM_001146060	ALS2CL	NA	0.177628	NA	NA
Als2cl	NM_001146059	ALS2CL	NA	0.177628	NA	NA
Als2cl	NM_146228	ALS2CL	NA	0.177628	NA	NA
Amacr	NM_008537	AMACR	NA	-0.228376	-0.463313	-0.312275
Ambra1	NM_001080754	AMBRA1	-0.190908	0.240075	0.0994453	0.104404
Ambra1	NM_172669	AMBRA1	-0.190908	0.240075	0.0994453	0.104404
Amfr	NM_011787	AMFR	-0.490312	-0.326073	-0.00288451	-0.0377467
Amigo2	NM_001164602	AMIGO2	-0.2016	NA	NA	NA
Amigo2	NM_001164563	AMIGO2	-0.2016	NA	NA	NA
Amigo2	NM_178114	AMIGO2	-0.2016	NA	NA	NA
Ammecr1l	NM_153515	AMMECR1L	NA	0.0847981	-0.0346158	-0.116746
Ammecr1l	NM_001242430	AMMECR1L	NA	0.0847981	-0.0346158	-0.116746
Ampd2	NM_001289720	AMPD2	0.221475	-0.46987	0.136538	0.00741455
Ampd2	NM_028779	AMPD2	0.221475	-0.46987	0.136538	0.00741455
Ampd2	NM_001346665	AMPD2	0.221475	-0.46987	0.136538	0.00741455
Ampd2	NM_001289719	AMPD2	0.221475	-0.46987	0.136538	0.00741455
Ampd3	NM_009667	AMPD3	NA	-0.483905	NA	NA
Ampd3	NM_001276301	AMPD3	NA	-0.483905	NA	NA
Amz2	NM_001252193	AMZ2	NA	0.522493	-0.10059	0.282715
Amz2	NM_025275	AMZ2	NA	0.522493	-0.10059	0.282715
Anapc1	NM_008569	ANAPC1	-0.235088	-0.0932669	-0.0227471	-0.181316
Anapc11	NM_001038230	ANAPC11	NA	-0.324724	-0.232912	0.160959
Anapc11	NM_025389	ANAPC11	NA	-0.324724	-0.232912	0.160959
Anapc13	NM_181394	ANAPC13	NA	0.0446981	-0.039312	-0.0952733
Anapc15	NM_001291353	ANAPC15	NA	-0.726614	0.0324277	0.127473
Anapc15	NM_001291352	ANAPC15	NA	-0.726614	0.0324277	0.127473
Anapc15	NM_027532	ANAPC15	NA	-0.726614	0.0324277	0.127473
Anapc15	NM_001291348	ANAPC15	NA	-0.726614	0.0324277	0.127473
Anapc15	NM_001291349	ANAPC15	NA	-0.726614	0.0324277	0.127473
Anapc16	NM_025514	ANAPC16	-0.85056	0.125857	-0.134439	-0.0364729
Anapc16	NM_001347451	ANAPC16	-0.85056	0.125857	-0.134439	-0.0364729
Anapc2	NM_175300	ANAPC2	-0.0589475	-0.0860643	-0.0789389	0.680182
Anapc4	NM_024213	ANAPC4	-0.0333964	0.00599896	-0.0613502	-0.0555249
Anapc5	NM_001042491	ANAPC5	-0.719454	-0.666841	0.0756356	0.178347
Anapc5	NM_021505	ANAPC5	-0.719454	-0.666841	0.0756356	0.178347
Anapc5	NM_001289519	ANAPC5	-0.719454	-0.666841	0.0756356	0.178347
Anapc5	NM_001289517	ANAPC5	-0.719454	-0.666841	0.0756356	0.178347
Anapc5	NM_001289518	ANAPC5	-0.719454	-0.666841	0.0756356	0.178347
Anapc5	NM_001289520	ANAPC5	-0.719454	-0.666841	0.0756356	0.178347
Anapc7	NM_019805	ANAPC7	-0.343139	0.0451994	0.0380723	0.507552
Angel1	NM_144524	ANGEL1	NA	-0.0329618	NA	NA
Angel2	NM_021421	ANGEL2	NA	0.0513701	0.0136338	-0.179636
Angel2	NR_037579	ANGEL2	NA	0.0513701	0.0136338	-0.179636
Angel2	NM_001199020	ANGEL2	NA	0.0513701	0.0136338	-0.179636
Angel2	NR_037578	ANGEL2	NA	0.0513701	0.0136338	-0.179636
Angptl2	NM_011923	ANGPTL2	NA	-0.380443	1.00019	0.829815
Angptl4	NM_020581	ANGPTL4	NA	-0.244416	0.04224	0.274651
Angptl6	NM_145154	ANGPTL6	NA	0.0962673	NA	NA
Ank	NM_020332	ANKH	NA	0.234949	0.463819	0.0555976
Ankfy1	NM_009671	ANKFY1	-0.157839	-0.0202009	-0.266552	-0.331225
Ankib1	NM_001289529	ANKIB1	NA	0.0394741	-0.253609	-0.199917
Ankib1	NM_001289527	ANKIB1	NA	0.0394741	-0.253609	-0.199917
Ankib1	NM_001289528	ANKIB1	NA	0.0394741	-0.253609	-0.199917
Ankib1	NM_001003909	ANKIB1	NA	0.0394741	-0.253609	-0.199917
Ankle2	NM_027922	ANKLE2	0.146556	NA	NA	NA
Ankle2	NM_001253814	ANKLE2	0.146556	NA	NA	NA
Ankmy2	NM_146033	ANKMY2	NA	-0.0867471	NA	NA
Ankra2	NM_001271389	ANKRA2	NA	0.0217313	-0.390677	NA
Ankra2	NM_023472	ANKRA2	NA	0.0217313	-0.390677	NA
Ankra2	NM_001271392	ANKRA2	NA	0.0217313	-0.390677	NA
Ankra2	NM_001271390	ANKRA2	NA	0.0217313	-0.390677	NA
Ankra2	NM_001271388	ANKRA2	NA	0.0217313	-0.390677	NA
Ankra2	NM_001271391	ANKRA2	NA	0.0217313	-0.390677	NA
Ankrd10	NM_001281974	ANKRD10	-0.122401	-0.12972	-0.0144609	-0.263271
Ankrd10	NM_001281975	ANKRD10	-0.122401	-0.12972	-0.0144609	-0.263271
Ankrd10	NM_001167967	ANKRD10	-0.122401	-0.12972	-0.0144609	-0.263271
Ankrd10	NM_133971	ANKRD10	-0.122401	-0.12972	-0.0144609	-0.263271
Ankrd10	NR_030781	ANKRD10	-0.122401	-0.12972	-0.0144609	-0.263271
Ankrd11	NR_037865	ANKRD11	-0.0233768	NA	NA	NA
Ankrd11	NM_001081379	ANKRD11	-0.0233768	NA	NA	NA
Ankrd12	NM_001025572	ANKRD12	-0.41999	NA	NA	NA
Ankrd13a	NM_026718	ANKRD13A	-0.434128	0.107493	0.0178674	0.41994
Ankrd13c	NM_001013806	ANKRD13C	-0.116826	-0.281884	0.12908	-0.461518
Ankrd17	NM_030886	ANKRD17	-0.179684	-0.0115531	0.0949099	-0.00944149
Ankrd17	NM_198010	ANKRD17	-0.179684	-0.0115531	0.0949099	-0.00944149
Ankrd24	NM_027480	ANKRD24	NA	0.0925128	NA	NA
Ankrd27	NM_145633	ANKRD27	-0.374178	NA	NA	NA
Ankrd27	NM_178263	ANKRD27	-0.374178	NA	NA	NA
Ankrd28	NM_001024604	ANKRD28	-0.206354	0.0133995	0.379352	-0.183635
Ankrd33b	NM_026153	ANKRD33B	0.398266	-0.00257154	NA	-1.00345
Ankrd33b	NM_001164441	ANKRD33B	0.398266	-0.00257154	NA	-1.00345
Ankrd33b	NM_027496	ANKRD33B	0.398266	-0.00257154	NA	-1.00345
Ankrd40	NM_146024	ANKRD40	-0.0348496	-0.120589	-0.0989901	0.0463968
Ankrd40	NM_027799	ANKRD40	-0.0348496	-0.120589	-0.0989901	0.0463968
Ankrd46	NM_175134	ANKRD46	NA	0.0201613	0.119594	0.0132678
Ankrd49	NM_001348260	ANKRD49	NA	-0.473176	-0.0211994	-0.471906
Ankrd49	NM_019683	ANKRD49	NA	-0.473176	-0.0211994	-0.471906
Ankrd52	NM_172790	ANKRD52	-0.356083	NA	NA	NA
Ankrd54	NM_144849	ANKRD54	NA	0.0283633	-0.19925	0.34739
Anks1	NM_001286040	ANKS1A	NA	-0.0287442	NA	NA
Anks1	NM_001286041	ANKS1A	NA	-0.0287442	NA	NA
Anks1	NM_181413	ANKS1A	NA	-0.0287442	NA	NA
Anks3	NM_028301	ANKS3	-0.0507922	-0.000467063	NA	NA
Ankzf1	NR_051998	ANKZF1	NA	-0.0408907	NA	NA
Ankzf1	NR_051999	ANKZF1	NA	-0.0408907	NA	NA
Ankzf1	NM_026187	ANKZF1	NA	-0.0408907	NA	NA
Ankzf1	NM_001267620	ANKZF1	NA	-0.0408907	NA	NA
Anln	NM_028390	ANLN	-0.00610383	-0.324393	0.254833	-0.0860656
Ano10	NM_133979	ANO10	-0.035186	0.339316	NA	NA
Ano10	NM_001271873	ANO10	-0.035186	0.339316	NA	NA
Ano6	NM_001253813	ANO6	-0.232393	NA	NA	NA
Ano6	NM_175344	ANO6	-0.232393	NA	NA	NA
Anp32b	NM_130889	ANP32B	-0.357436	-0.27256	-0.0528154	-0.0534242
Anp32e	NM_001253758	ANP32E	-0.193332	-0.402035	0.0941228	-0.0670427
Anp32e	NM_001253757	ANP32E	-0.193332	-0.402035	0.0941228	-0.0670427
Anp32e	NM_023210	ANP32E	-0.193332	-0.402035	0.0941228	-0.0670427
Antxr2	NM_133738	ANTXR2	NA	0.111774	-0.282308	0.870564
Anxa1	NM_010730	ANXA1	NA	0.623484	0.623851	0.844537
Anxa11	NM_013469	ANXA11	-0.411405	NA	-0.210379	-0.449436
Anxa2	NM_007585	ANXA2	0.379327	0.363885	NA	NA
Anxa4	NM_013471	ANXA4	0.606088	0.294401	-0.020918	0.300656
Anxa4	NM_001331120	ANXA4	0.606088	0.294401	-0.020918	0.300656
Anxa5	NM_009673	ANXA5	0.0889405	0.228044	0.0213155	0.683418
Anxa6	NM_013472	ANXA6	-0.624588	0.200264	-0.397513	0.425269
Anxa6	NR_138556	ANXA6	-0.624588	0.200264	-0.397513	0.425269
Anxa6	NM_001110211	ANXA6	-0.624588	0.200264	-0.397513	0.425269
Anxa7	NM_001110794	ANXA7	0.0262311	0.417036	0.11127	0.133257
Anxa7	NM_009674	ANXA7	0.0262311	0.417036	0.11127	0.133257
Anxa9	NM_001085383	ANXA9	NA	0.0493252	NA	NA
Anxa9	NM_023628	ANXA9	NA	0.0493252	NA	NA
Ap1ar	NM_001346718	AP1AR	NA	-0.563609	0.254879	-0.415062
Ap1ar	NM_145964	AP1AR	NA	-0.563609	0.254879	-0.415062
Ap1b1	NM_001243043	AP1B1	-0.618273	0.327767	0.00733721	0.724114
Ap1b1	NM_007454	AP1B1	-0.618273	0.327767	0.00733721	0.724114
Ap1b1	NM_001243044	AP1B1	-0.618273	0.327767	0.00733721	0.724114
Ap1g1	NM_009677	AP1G1	0.200473	0.136849	NA	NA
Ap1g1	NM_001301211	AP1G1	0.200473	0.136849	NA	NA
Ap1g2	NM_001303502	AP1G2	0.0328135	0.228113	0.0970704	0.294466
Ap1g2	NM_007455	AP1G2	0.0328135	0.228113	0.0970704	0.294466
Ap1m1	NM_007456	AP1M1	-0.274431	-0.184585	-0.12504	0.163953
Ap1m2	NM_001110300	AP1M2	NA	0.265364	NA	NA
Ap1m2	NM_009678	AP1M2	NA	0.265364	NA	NA
Ap1s1	NM_007457	AP1S1	NA	-0.269027	-0.161049	0.577619
Ap2a1	NM_007458	AP2A1	-0.241911	-0.21885	-0.209576	NA
Ap2a1	NM_001077264	AP2A1	-0.241911	-0.21885	-0.209576	NA
Ap2a2	NM_007459	AP2A2	-0.133503	-0.0325667	0.133264	NA
Ap2b1	NM_027915	AP2B1	-0.100871	0.342637	0.333769	-0.207089
Ap2b1	NM_001035854	AP2B1	-0.100871	0.342637	0.333769	-0.207089
Ap2m1	NM_009679	AP2M1	NA	-0.20965	-0.0947654	0.52086
Ap2m1	NM_001302970	AP2M1	NA	-0.20965	-0.0947654	0.52086
Ap2s1	NM_198613	AP2S1	-0.338167	-0.190153	-0.14512	0.571367
Ap3b1	NM_009680	AP3B1	-0.0157566	-0.278719	-0.0569757	-0.182652
Ap3d1	NM_007460	AP3D1	-0.0846281	0.598907	0.423693	0.279429
Ap3m1	NM_018829	AP3M1	NA	-0.0781024	0.127087	0.153133
Ap3m2	NM_029505	AP3M2	NA	0.0619649	NA	NA
Ap3m2	NM_001122820	AP3M2	NA	0.0619649	NA	NA
Ap3s1	NM_009681	AP3S1	NA	-0.0790496	0.0215537	0.0100126
Ap3s1	NM_001303015	AP3S1	NA	-0.0790496	0.0215537	0.0100126
Ap3s2	NM_009682	AP3S2	NA	-0.188658	NA	NA
Ap4e1	NM_175550	AP4E1	0.62444	NA	NA	NA
Ap4m1	NM_021392	AP4M1	NA	-0.262756	NA	NA
Ap4s1	NM_001329699	AP4S1	NA	-0.127626	0.228418	0.210935
Ap4s1	NM_021710	AP4S1	NA	-0.127626	0.228418	0.210935
Ap4s1	NM_001329698	AP4S1	NA	-0.127626	0.228418	0.210935
Ap5m1	NM_144535	AP5M1	0.321078	0.00803619	0.0278153	-0.248984
Ap5s1	NM_001291032	AP5S1	NA	0.0858793	NA	NA
Ap5s1	NM_001291031	AP5S1	NA	0.0858793	NA	NA
Ap5s1	NM_027129	AP5S1	NA	0.0858793	NA	NA
Ap5s1	NR_110992	AP5S1	NA	0.0858793	NA	NA
Apaf1	NM_001282947	APAF1	0.155849	0.397064	-0.142073	-0.0434357
Apaf1	NM_009684	APAF1	0.155849	0.397064	-0.142073	-0.0434357
Apaf1	NM_001042558	APAF1	0.155849	0.397064	-0.142073	-0.0434357
Apba3	NM_018758	APBA3	-0.609778	-0.162219	-0.156197	-0.0704713
Apbb1	NM_009685	APBB1	NA	-0.0677711	NA	NA
Apbb1	NM_001310600	APBB1	NA	-0.0677711	NA	NA
Apbb1	NM_001253885	APBB1	NA	-0.0677711	NA	NA
Apbb1	NM_001253886	APBB1	NA	-0.0677711	NA	NA
Apbb1	NM_001253887	APBB1	NA	-0.0677711	NA	NA
Apbb1ip	NM_019456	APBB1IP	0.111797	-0.258383	-0.00447798	NA
Apc	NM_007462	APC	0.00295133	0.0823591	0.20671	NA
Apeh	NM_146226	APEH	-0.666432	-0.2953	0.0206508	0.287552
Apex1	NM_009687	APEX1	-0.371994	-0.342365	0.153277	0.27135
Apex2	NM_029943	APEX2	NA	-0.296329	-0.0102707	0.0737948
Aph1a	NM_146104	APH1A	NA	-0.0499596	-0.258423	-0.383124
Aph1a	NM_146134	APH1A	NA	-0.0499596	-0.258423	-0.383124
Api5	NM_001305258	API5	-0.0470791	-0.122103	0.0485308	-0.154836
Api5	NM_007466	API5	-0.0470791	-0.122103	0.0485308	-0.154836
Apip	NM_019735	APIP	0.161688	-0.387841	0.266396	-0.25134
Aplf	NM_001170489	APLF	-0.0129902	-0.387231	NA	NA
Aplf	NM_024251	APLF	-0.0129902	-0.387231	NA	NA
Apln	NM_013912	APLN	NA	-0.0418334	NA	NA
Aplp1	NM_007467	APLP1	NA	0.352579	NA	NA
Aplp2	NM_001102455	APLP2	0.107104	0.081181	0.112009	0.224779
Aplp2	NM_009691	APLP2	0.107104	0.081181	0.112009	0.224779
Aplp2	NM_001102456	APLP2	0.107104	0.081181	0.112009	0.224779
Apmap	NM_027977	APMAP	-0.0764156	0.388384	0.0537882	0.0756516
Apoa1bp	NM_144897	NAXE	-0.253305	0.0571097	-0.0217919	0.614935
Apoa2	NM_001305549	APOA2	NA	0.204656	NA	NA
Apoa2	NR_131173	APOA2	NA	0.204656	NA	NA
Apoa2	NM_001305585	APOA2	NA	0.204656	NA	NA
Apoa2	NM_001305550	APOA2	NA	0.204656	NA	NA
Apoa2	NM_013474	APOA2	NA	0.204656	NA	NA
Apobec1	NM_001134391	APOBEC1	0.224049	-0.159795	NA	-1.04095
Apobec1	NM_031159	APOBEC1	0.224049	-0.159795	NA	-1.04095
Apobec3	NM_001160415	APOBEC3H	0.143776	0.178894	-1.83212	-0.173127
Apobec3	NM_030255	APOBEC3H	0.143776	0.178894	-1.83212	-0.173127
Apobec3	NM_001347041	APOBEC3H	0.143776	0.178894	-1.83212	-0.173127
Apobr	NM_138310	APOBR	NA	0.593602	NA	NA
Apool	NM_026565	APOOL	-0.123596	-0.122398	-0.210957	-0.101125
Apool	NM_001313734	APOOL	-0.123596	-0.122398	-0.210957	-0.101125
Apool	NM_001313733	APOOL	-0.123596	-0.122398	-0.210957	-0.101125
Appbp2	NM_025825	APPBP2	-0.270007	-0.0125782	0.00580802	-0.302753
Appl1	NM_145221	APPL1	-0.163353	0.426729	0.167347	-0.0505567
Appl2	NM_145220	APPL2	NA	1.53112	NA	NA
Aprt	NM_009698	APRT	-0.785411	-0.435004	-0.0278189	0.137677
Aptx	NM_001025445	APTX	NA	0.249779	-0.145808	0.303985
Aptx	NM_025545	APTX	NA	0.249779	-0.145808	0.303985
Aptx	NM_001025444	APTX	NA	0.249779	-0.145808	0.303985
Aqp3	NM_016689	AQP3	NA	0.202469	NA	2.07376
Aqp9	NR_073483	AQP9	NA	2.07026	NA	NA
Aqp9	NM_001271843	AQP9	NA	2.07026	NA	NA
Aqp9	NM_022026	AQP9	NA	2.07026	NA	NA
Aqr	NM_009702	AQR	-0.19648	-0.0803922	0.121783	0.00590378
Aqr	NM_001290788	AQR	-0.19648	-0.0803922	0.121783	0.00590378
Ar	NM_013476	AR	NA	-0.293206	NA	NA
Araf	NM_009703	ARAF	-0.354607	0.374771	-0.311687	0.628636
Araf	NM_001159645	ARAF	-0.354607	0.374771	-0.311687	0.628636
Arap1	NM_001040111	ARAP1	-0.0361868	0.807388	NA	NA
Arap1	NM_198096	ARAP1	-0.0361868	0.807388	NA	NA
Arap1	NM_027180	ARAP1	-0.0361868	0.807388	NA	NA
Arap1	NM_001040112	ARAP1	-0.0361868	0.807388	NA	NA
Arap2	NM_178407	ARAP2	-0.798356	1.30853	-0.321842	-0.331958
Arcn1	NM_145985	ARCN1	0.0756745	0.0553957	-0.0228948	0.0257489
Areg	NM_009704	AREG	NA	NA	NA	1.83175
Arel1	NM_178065	AREL1	-0.00749422	NA	NA	NA
Arf1	NM_001130408	ARF1	-0.25855	0.148221	-0.0459564	0.0406022
Arf1	NM_007476	ARF1	-0.25855	0.148221	-0.0459564	0.0406022
Arf3	NM_007478	ARF3	-0.625736	0.0430992	-0.212728	0.251331
Arf4	NM_007479	ARF4	0.0967412	0.0362166	-0.093817	-0.163198
Arf5	NM_007480	ARF5	-0.288806	0.150592	0.0424439	0.340262
Arf6	NM_007481	ARF6	0.0306391	0.0893471	-0.0722561	0.222431
Arfgap1	NM_001177710	ARFGAP1	-0.180832	0.202757	-0.0643492	0.148806
Arfgap1	NM_001177706	ARFGAP1	-0.180832	0.202757	-0.0643492	0.148806
Arfgap1	NM_145760	ARFGAP1	-0.180832	0.202757	-0.0643492	0.148806
Arfgap1	NM_001177707	ARFGAP1	-0.180832	0.202757	-0.0643492	0.148806
Arfgap1	NM_001177708	ARFGAP1	-0.180832	0.202757	-0.0643492	0.148806
Arfgap1	NM_001177709	ARFGAP1	-0.180832	0.202757	-0.0643492	0.148806
Arfgap2	NM_001166024	ARFGAP2	0.124046	-0.062718	-0.10315	0.595618
Arfgap2	NM_023854	ARFGAP2	0.124046	-0.062718	-0.10315	0.595618
Arfgap3	NM_025445	ARFGAP3	0.197689	0.501144	NA	0.356716
Arfgef1	NM_001102430	ARFGEF1	-0.334918	-0.0167516	-0.19179	-0.371984
Arfgef2	NM_001085495	ARFGEF2	-0.116567	NA	NA	NA
Arfip2	NM_029802	ARFIP2	NA	-0.159319	0.061459	0.266227
Arfrp1	NR_028585	ARFRP1	-0.0360738	-0.0860287	-0.259522	-0.373449
Arfrp1	NM_001165992	ARFRP1	-0.0360738	-0.0860287	-0.259522	-0.373449
Arfrp1	NM_029702	ARFRP1	-0.0360738	-0.0860287	-0.259522	-0.373449
Arfrp1	NM_001165995	ARFRP1	-0.0360738	-0.0860287	-0.259522	-0.373449
Arfrp1	NM_001165991	ARFRP1	-0.0360738	-0.0860287	-0.259522	-0.373449
Arglu1	NM_176849	ARGLU1	-0.628073	0.172988	-0.0232731	-0.522642
Arhgap1	NM_146124	ARHGAP1	NA	0.192785	0.32459	1.04955
Arhgap1	NR_027373	ARHGAP1	NA	0.192785	0.32459	1.04955
Arhgap1	NM_001145902	ARHGAP1	NA	0.192785	0.32459	1.04955
Arhgap1	NR_027371	ARHGAP1	NA	0.192785	0.32459	1.04955
Arhgap1	NR_027372	ARHGAP1	NA	0.192785	0.32459	1.04955
Arhgap11a	NM_181416	ARHGAP11B	-0.220126	NA	NA	NA
Arhgap12	NM_029277	ARHGAP12	-0.079524	0.710662	NA	-0.177325
Arhgap12	NM_001039692	ARHGAP12	-0.079524	0.710662	NA	-0.177325
Arhgap15	NM_153820	ARHGAP15	-0.107206	NA	NA	NA
Arhgap15	NM_001301832	ARHGAP15	-0.107206	NA	NA	NA
Arhgap15	NM_001301831	ARHGAP15	-0.107206	NA	NA	NA
Arhgap17	NM_001316713	ARHGAP17	-0.00806633	0.0748422	0.0511637	0.181766
Arhgap17	NM_144529	ARHGAP17	-0.00806633	0.0748422	0.0511637	0.181766
Arhgap17	NM_001122640	ARHGAP17	-0.00806633	0.0748422	0.0511637	0.181766
Arhgap17	NM_001122642	ARHGAP17	-0.00806633	0.0748422	0.0511637	0.181766
Arhgap17	NM_001122643	ARHGAP17	-0.00806633	0.0748422	0.0511637	0.181766
Arhgap17	NM_001122641	ARHGAP17	-0.00806633	0.0748422	0.0511637	0.181766
Arhgap18	NM_176837	ARHGAP18	1.04239	1.45882	0.856127	1.38689
Arhgap21	NM_001081364	ARHGAP21	NA	-0.547258	-0.0458684	-0.405598
Arhgap21	NM_001128084	ARHGAP21	NA	-0.547258	-0.0458684	-0.405598
Arhgap24	NM_146161	ARHGAP24	-0.827124	NA	NA	NA
Arhgap24	NM_001286468	ARHGAP24	-0.827124	NA	NA	NA
Arhgap24	NM_001346585	ARHGAP24	-0.827124	NA	NA	NA
Arhgap24	NM_029270	ARHGAP24	-0.827124	NA	NA	NA
Arhgap25	NM_001037727	ARHGAP25	-0.268054	NA	NA	NA
Arhgap25	NM_175476	ARHGAP25	-0.268054	NA	NA	NA
Arhgap25	NR_104483	ARHGAP25	-0.268054	NA	NA	NA
Arhgap25	NM_001286610	ARHGAP25	-0.268054	NA	NA	NA
Arhgap26	NM_175164	ARHGAP26	-0.263397	NA	NA	NA
Arhgap27	NM_133715	ARHGAP27	-0.161854	0.215306	-0.23489	NA
Arhgap27	NM_183288	ARHGAP27	-0.161854	0.215306	-0.23489	NA
Arhgap27	NM_001205236	ARHGAP27	-0.161854	0.215306	-0.23489	NA
Arhgap30	NM_001005508	ARHGAP30	-0.036431	NA	NA	NA
Arhgap35	NM_172739	ARHGAP35	NA	-0.165786	NA	NA
Arhgap39	NM_198420	ARHGAP39	NA	-0.434728	NA	NA
Arhgap39	NM_001168288	ARHGAP39	NA	-0.434728	NA	NA
Arhgap4	NM_138630	ARHGAP4	NA	0.566765	0.191129	NA
Arhgap4	NM_001162423	ARHGAP4	NA	0.566765	0.191129	NA
Arhgap4	NM_001162424	ARHGAP4	NA	0.566765	0.191129	NA
Arhgap5	NM_009706	ARHGAP5	NA	-0.790865	NA	-0.373674
Arhgap9	NM_146011	ARHGAP9	-0.400594	0.210504	-0.17034	0.61597
Arhgap9	NM_001285785	ARHGAP9	-0.400594	0.210504	-0.17034	0.61597
Arhgdia	NM_133796	ARHGDIA	-0.0765247	-0.0995649	0.012698	-0.0288427
Arhgdib	NM_001301305	ARHGDIB	-0.136433	0.196997	-0.00398856	0.0877228
Arhgdib	NM_001301308	ARHGDIB	-0.136433	0.196997	-0.00398856	0.0877228
Arhgdib	NM_001301301	ARHGDIB	-0.136433	0.196997	-0.00398856	0.0877228
Arhgdib	NM_007486	ARHGDIB	-0.136433	0.196997	-0.00398856	0.0877228
Arhgdib	NM_001301303	ARHGDIB	-0.136433	0.196997	-0.00398856	0.0877228
Arhgdib	NM_001301309	ARHGDIB	-0.136433	0.196997	-0.00398856	0.0877228
Arhgdig	NM_008113	ARHGDIG	NA	-0.782359	0.304543	0.387472
Arhgef1	NM_001130153	ARHGEF1	-0.167492	0.677027	0.0668231	0.602066
Arhgef1	NM_001130150	ARHGEF1	-0.167492	0.677027	0.0668231	0.602066
Arhgef1	NM_008488	ARHGEF1	-0.167492	0.677027	0.0668231	0.602066
Arhgef1	NM_001130152	ARHGEF1	-0.167492	0.677027	0.0668231	0.602066
Arhgef1	NM_001130151	ARHGEF1	-0.167492	0.677027	0.0668231	0.602066
Arhgef10	NM_172751	ARHGEF10	NA	0.211905	NA	NA
Arhgef10	NM_001037736	ARHGEF10	NA	0.211905	NA	NA
Arhgef12	NM_027144	ARHGEF12	NA	0.0811987	NA	NA
Arhgef2	NM_001198911	ARHGEF2	0.122842	0.124514	0.104928	0.497024
Arhgef2	NM_001198912	ARHGEF2	0.122842	0.124514	0.104928	0.497024
Arhgef2	NM_001198913	ARHGEF2	0.122842	0.124514	0.104928	0.497024
Arhgef2	NM_008487	ARHGEF2	0.122842	0.124514	0.104928	0.497024
Arhgef25	NM_001166413	ARHGEF25	NA	0.260482	NA	NA
Arhgef25	NM_028027	ARHGEF25	NA	0.260482	NA	NA
Arhgef3	NM_001289686	ARHGEF3	0.0700848	0.0514681	-0.191486	0.17766
Arhgef3	NM_027871	ARHGEF3	0.0700848	0.0514681	-0.191486	0.17766
Arhgef3	NM_001289687	ARHGEF3	0.0700848	0.0514681	-0.191486	0.17766
Arhgef3	NM_001289688	ARHGEF3	0.0700848	0.0514681	-0.191486	0.17766
Arhgef5	NM_133674	ARHGEF5	NA	-0.176363	NA	NA
Arhgef6	NM_152801	ARHGEF6	-0.356463	NA	NA	NA
Arhgef7	NM_001113517	ARHGEF7	-0.266439	0.162672	0.0435752	NA
Arhgef7	NM_001113518	ARHGEF7	-0.266439	0.162672	0.0435752	NA
Arhgef7	NM_017402	ARHGEF7	-0.266439	0.162672	0.0435752	NA
Arid1a	NM_001080819	ARID1A	-0.151014	0.131715	-0.0399846	-0.111143
Arid1b	NM_001085355	ARID1B	0.0485645	NA	NA	NA
Arid2	NM_175251	ARID2	0.436288	-0.0372716	0.405851	-0.115319
Arid3a	NM_007880	ARID3A	-0.353174	0.12892	NA	NA
Arid3a	NM_001288626	ARID3A	-0.353174	0.12892	NA	NA
Arid3a	NM_001288625	ARID3A	-0.353174	0.12892	NA	NA
Arid3b	NM_019689	ARID3B	0.127872	0.262925	0.0878472	0.152726
Arid4a	NM_001081195	ARID4A	0.158735	NA	NA	NA
Arid4b	NM_198122	ARID4B	0.49397	0.505342	0.0433636	-0.192718
Arid4b	NM_194262	ARID4B	0.49397	0.505342	0.0433636	-0.192718
Arid5a	NM_001290727	ARID5A	-0.0707057	0.432514	-0.446367	-0.176821
Arid5a	NM_001290726	ARID5A	-0.0707057	0.432514	-0.446367	-0.176821
Arid5a	NM_145996	ARID5A	-0.0707057	0.432514	-0.446367	-0.176821
Arid5a	NM_001172205	ARID5A	-0.0707057	0.432514	-0.446367	-0.176821
Arid5a	NR_033310	ARID5A	-0.0707057	0.432514	-0.446367	-0.176821
Arid5a	NM_001172206	ARID5A	-0.0707057	0.432514	-0.446367	-0.176821
Arid5b	NM_023598	ARID5B	0.315295	0.584144	NA	-0.0791846
Arih1	NM_019927	ARIH1	-0.348483	-0.0250957	0.0684847	-0.152884
Arih2	NM_011790	ARIH2	-0.287747	-0.0609445	-0.0023558	0.200894
Arl1	NM_025859	ARL1	-0.331572	-0.214233	-0.155819	-0.00537487
Arl14ep	NM_173750	ARL14EP	-0.314711	0.155152	-0.279915	-0.277843
Arl14ep	NM_001025102	ARL14EP	-0.314711	0.155152	-0.279915	-0.277843
Arl16	NM_197995	ARL16	NA	0.0941177	NA	NA
Arl2	NM_019722	ARL2	0.0738872	-0.367332	0.186991	0.875247
Arl2bp	NM_024191	ARL2BP	NA	0.151047	0.416494	0.715299
Arl2bp	NM_024269	ARL2BP	NA	0.151047	0.416494	0.715299
Arl3	NM_019718	ARL3	-0.239761	0.00869713	-0.030571	0.133421
Arl4c	NM_177305	ARL4C	-0.135609	NA	NA	NA
Arl4d	NM_025404	ARL4D	NA	-0.30261	NA	NA
Arl5a	NM_182994	ARL5A	-0.0389854	-0.204828	0.0523902	-0.0146174
Arl5b	NM_029466	ARL5B	0.661867	NA	NA	NA
Arl5c	NM_207231	ARL5C	0.844757	NA	NA	NA
Arl6	NM_019665	ARL6	NA	-0.818323	-0.123542	0.0704271
Arl6	NM_001347244	ARL6	NA	-0.818323	-0.123542	0.0704271
Arl6ip1	NM_019419	ARL6IP1	-0.264787	-0.29856	-0.267146	0.333759
Arl6ip4	NM_144509	ARL6IP4	NA	-0.316108	0.0902977	0.395809
Arl6ip5	NM_022992	ARL6IP5	-0.176601	0.359519	-0.624425	-0.032813
Arl6ip6	NM_022989	ARL6IP6	NA	-0.403453	-0.279067	-0.211213
Arl8a	NM_026823	ARL8A	-0.0370357	0.393815	-0.352044	0.294647
Arl8b	NM_026011	ARL8B	-0.620531	0.0461352	0.011049	-0.0955212
Armc1	NM_028840	ARMC1	-0.365018	-0.66241	0.0840409	-0.30757
Armc10	NM_026034	ARMC10	NA	-0.0904138	0.15398	-0.311987
Armc5	NM_146205	ARMC5	NA	-0.116342	0.0988825	-0.00702966
Armc6	NM_133972	ARMC6	NA	-0.209588	-0.0289346	0.0568877
Armc7	NM_177778	ARMC7	NA	0.133079	-0.00593831	NA
Armc8	NM_028768	ARMC8	-0.370753	NA	NA	NA
Armc8	NM_001166138	ARMC8	-0.370753	NA	NA	NA
Armcx1	NM_001166379	ARMCX1	NA	-0.575855	NA	0.440999
Armcx1	NM_001166380	ARMCX1	NA	-0.575855	NA	0.440999
Armcx1	NM_030066	ARMCX1	NA	-0.575855	NA	0.440999
Armcx1	NM_001166377	ARMCX1	NA	-0.575855	NA	0.440999
Armcx1	NM_001166378	ARMCX1	NA	-0.575855	NA	0.440999
Armcx2	NM_026139	ARMCX2	0.311208	NA	NA	NA
Armcx2	NM_001166398	ARMCX2	0.311208	NA	NA	NA
Armcx2	NM_001166397	ARMCX2	0.311208	NA	NA	NA
Armcx3	NM_027870	ARMCX3	NA	0.563207	-0.195635	0.138978
Armcx4	NM_001202500	ARMCX4	NA	-0.917279	0.5175	0.248166
Armcx5	NM_001009575	ARMCX5	NA	-0.000563498	NA	NA
Armt1	NM_024261	ARMT1	-0.221937	-0.175224	-0.172165	-0.100699
Arnt	NM_009709	ARNT	-0.205092	NA	NA	NA
Arnt	NM_001037737	ARNT	-0.205092	NA	NA	NA
Arntl	NM_007489	ARNTL	NA	0.472591	0.456578	1.05082
Arntl	NM_001243048	ARNTL	NA	0.472591	0.456578	1.05082
Arpc1a	NM_019767	ARPC1A	-0.856871	-0.0648888	-0.13962	-0.223341
Arpc1b	NM_023142	ARPC1B	-0.0151165	NA	-0.152418	0.237537
Arpc2	NM_029711	ARPC2	-0.299123	0.137696	0.0506225	0.0913321
Arpc3	NM_019824	ARPC3	-0.297489	0.264909	-0.0797428	0.157048
Arpc4	NM_001170485	ARPC4	-0.424085	-0.0100459	-0.1879	1.08053
Arpc4	NM_001170486	ARPC4	-0.424085	-0.0100459	-0.1879	1.08053
Arpc4	NM_026552	ARPC4	-0.424085	-0.0100459	-0.1879	1.08053
Arpc5l	NM_028809	ARPC5L	0.122346	-0.316023	-0.0668658	-0.388871
Arpp19	NM_021548	ARPP19	-0.236951	-0.35916	-0.0288714	-0.338713
Arpp19	NM_001142655	ARPP19	-0.236951	-0.35916	-0.0288714	-0.338713
Arrb1	NM_178220	ARRB1	NA	0.791987	0.502199	NA
Arrb1	NM_177231	ARRB1	NA	0.791987	0.502199	NA
Arrb2	NM_001271358	ARRB2	-0.418629	0.201334	0.000389077	0.266093
Arrb2	NM_001271360	ARRB2	-0.418629	0.201334	0.000389077	0.266093
Arrb2	NM_145429	ARRB2	-0.418629	0.201334	0.000389077	0.266093
Arrb2	NM_001271359	ARRB2	-0.418629	0.201334	0.000389077	0.266093
Arrdc1	NM_178408	ARRDC1	0.0297594	0.166666	-0.0247547	NA
Arrdc1	NR_027876	ARRDC1	0.0297594	0.166666	-0.0247547	NA
Arrdc1	NM_001162485	ARRDC1	0.0297594	0.166666	-0.0247547	NA
Arrdc4	NM_025549	ARRDC4	NA	0.311731	NA	NA
Arrdc4	NM_001042592	ARRDC4	NA	0.311731	NA	NA
Arsa	NM_009713	ARSA	NA	0.00752206	NA	NA
As3mt	NM_020577	AS3MT	NA	0.522702	NA	NA
Asah1	NM_019734	ASAH1	0.210417	-0.0940056	0.173368	0.189292
Asap1	NM_001276463	ASAP1	0.396265	-0.272526	NA	NA
Asap1	NM_001276461	ASAP1	0.396265	-0.272526	NA	NA
Asap1	NM_001276467	ASAP1	0.396265	-0.272526	NA	NA
Asap1	NM_010026	ASAP1	0.396265	-0.272526	NA	NA
Asap1	NM_001276462	ASAP1	0.396265	-0.272526	NA	NA
Asb13	NM_178283	ASB13	NA	-0.103875	NA	NA
Asb13	NM_001267724	ASB13	NA	-0.103875	NA	NA
Asb6	NM_133346	ASB6	NA	-0.0791856	NA	NA
Asb8	NM_001170710	ASB8	NA	-0.119429	-0.0803232	0.0166583
Asb8	NM_001170711	ASB8	NA	-0.119429	-0.0803232	0.0166583
Asb8	NM_030121	ASB8	NA	-0.119429	-0.0803232	0.0166583
Ascc1	NM_001199187	ASCC1	0.255115	0.184728	-0.221769	0.184501
Ascc1	NM_026937	ASCC1	0.255115	0.184728	-0.221769	0.184501
Ascc2	NM_029291	ASCC2	-0.207429	-0.0535545	0.150402	-0.0495728
Ascc3	NM_198007	ASCC3	-0.0591194	NA	NA	NA
Ascl2	NM_008554	ASCL2	NA	0.0902758	NA	NA
Asf1a	NM_025541	ASF1A	0.268828	-1.03873	0.236214	0.177277
Asf1b	NM_024184	ASF1B	NA	-0.526147	0.125035	0.129896
Ash1l	NM_138679	ASH1L	0.0242427	0.835482	0.308829	-0.3536
Ash2l	NM_001286207	ASH2L	-0.604408	-0.273665	-0.026644	0.038038
Ash2l	NM_011791	ASH2L	-0.604408	-0.273665	-0.026644	0.038038
Ash2l	NM_001080793	ASH2L	-0.604408	-0.273665	-0.026644	0.038038
Asl	NM_133768	AC068533.7	-0.527069	0.316984	-0.00141409	0.720772
Asna1	NM_019652	ASNA1	-0.274553	-0.450564	-0.0645167	1.02306
Asns	NM_012055	ASNS	-0.161133	-0.482251	-0.0966691	-0.0017838
Aspm	NM_009791	ASPM	-0.425772	-0.542034	-0.0318997	-0.168954
Aspscr1	NM_198223	ASPSCR1	-0.101995	-0.119273	0.224549	0.610341
Aspscr1	NM_001164224	ASPSCR1	-0.101995	-0.119273	0.224549	0.610341
Aspscr1	NM_026877	ASPSCR1	-0.101995	-0.119273	0.224549	0.610341
Asrgl1	NM_025610	ASRGL1	-0.416055	-0.244784	0.267956	0.230878
Aste1	NM_001164828	ASTE1	NA	-0.697726	-0.212913	-0.572377
Aste1	NM_025651	ASTE1	NA	-0.697726	-0.212913	-0.572377
Asxl1	NM_001039939	ASXL1	-0.214534	0.201339	0.0391707	0.0270855
Asxl2	NM_001270988	ASXL2	-0.0517877	NA	NA	NA
Asxl2	NM_172421	ASXL2	-0.0517877	NA	NA	NA
Atad1	NM_026487	ATAD1	-0.239233	-0.0538485	0.00909756	-0.397001
Atad2	NM_027435	ATAD2	0.301959	NA	NA	NA
Atad2b	NM_001099628	ATAD2B	-0.0423911	0.136395	-0.132992	0.0212175
Atad5	NM_001029856	ATAD5	0.0846584	NA	NA	NA
Atcay	NM_178662	ATCAY	NA	-0.325377	NA	NA
Ate1	NM_013799	ATE1	0.597682	-0.0712443	-0.0452767	0.235108
Ate1	NM_001271343	ATE1	0.597682	-0.0712443	-0.0452767	0.235108
Ate1	NM_001029895	ATE1	0.597682	-0.0712443	-0.0452767	0.235108
Ate1	NM_001136054	ATE1	0.597682	-0.0712443	-0.0452767	0.235108
Atf1	NM_007497	ATF1	-0.136979	NA	-0.15036	-0.305998
Atf2	NM_001284376	ATF2	-0.254651	NA	-0.105833	-0.289425
Atf2	NM_009715	ATF2	-0.254651	NA	-0.105833	-0.289425
Atf2	NM_001284372	ATF2	-0.254651	NA	-0.105833	-0.289425
Atf2	NM_001284374	ATF2	-0.254651	NA	-0.105833	-0.289425
Atf2	NM_001284371	ATF2	-0.254651	NA	-0.105833	-0.289425
Atf2	NM_001284370	ATF2	-0.254651	NA	-0.105833	-0.289425
Atf2	NM_001284369	ATF2	-0.254651	NA	-0.105833	-0.289425
Atf2	NM_001284373	ATF2	-0.254651	NA	-0.105833	-0.289425
Atf2	NM_001025093	ATF2	-0.254651	NA	-0.105833	-0.289425
Atf3	NM_007498	ATF3	NA	-1.28232	0.150836	0.106624
Atf4	NM_009716	ATF4	0.038162	-0.00408754	0.0365731	0.0219603
Atf4	NM_001287180	ATF4	0.038162	-0.00408754	0.0365731	0.0219603
Atf6	NM_001081304	ATF6	-0.140987	0.357525	-0.0538747	-0.17891
Atf6b	NM_017406	ATF6B	-0.144235	-0.437162	0.336057	-0.0876356
Atf7ip	NM_019426	ATF7IP	-0.102598	0.774591	-0.266451	0.413082
Atg10	NM_025770	ATG10	NA	0.151049	NA	NA
Atg101	NM_026566	ATG101	0.196728	-0.151848	-0.108767	0.115145
Atg12	NM_026217	ATG12	NA	0.42124	-0.151509	-0.0330045
Atg13	NM_145528	ATG13	-0.0202582	-0.0685645	-0.168993	-0.106557
Atg14	NM_172599	ATG14	NA	0.833969	NA	NA
Atg16l1	NM_001205391	ATG16L1	0.482705	0.249888	0.247879	0.379022
Atg16l1	NM_001205392	ATG16L1	0.482705	0.249888	0.247879	0.379022
Atg16l1	NM_029846	ATG16L1	0.482705	0.249888	0.247879	0.379022
Atg16l2	NM_001111111	ATG16L2	-0.224494	NA	NA	NA
Atg2a	NM_194348	ATG2A	0.13068	0.526913	NA	NA
Atg2b	NM_029654	ATG2B	-0.211874	-0.111764	-0.00277374	-0.229502
Atg3	NM_026402	ATG3	-0.199989	0.106942	0.0782541	0.253402
Atg4b	NM_174874	ATG4B	-0.0436404	-0.0192699	0.189778	-0.0635688
Atg4d	NM_153583	ATG4D	NA	0.159875	NA	NA
Atg7	NM_001253718	ATG7	NA	-0.0251567	NA	NA
Atg7	NM_028835	ATG7	NA	-0.0251567	NA	NA
Atg7	NM_001253717	ATG7	NA	-0.0251567	NA	NA
Atg9a	NM_001003917	ATG9A	-0.499921	NA	NA	NA
Atg9a	NM_001288613	ATG9A	-0.499921	NA	NA	NA
Atg9a	NM_001288612	ATG9A	-0.499921	NA	NA	NA
Atg9a	NR_109938	ATG9A	-0.499921	NA	NA	NA
Atg9b	NM_001002897	ATG9B	NA	1.17925	0.180561	NA
Atic	NM_026195	ATIC	-0.91219	NA	NA	NA
Atl2	NM_178050	ATL2	-0.0915789	-0.207268	0.231068	-0.126658
Atl2	NM_001286647	ATL2	-0.0915789	-0.207268	0.231068	-0.126658
Atl2	NM_019717	ATL2	-0.0915789	-0.207268	0.231068	-0.126658
Atl3	NM_001163505	ATL3	0.18398	-0.173577	-0.0470827	0.0932741
Atl3	NM_146091	ATL3	0.18398	-0.173577	-0.0470827	0.0932741
Atm	NM_007499	ATM	-0.100888	0.00017926	0.0887221	-0.444916
Atmin	NM_177700	ATMIN	-0.325268	-0.472616	0.149296	-0.0550032
Atox1	NM_009720	ATOX1	NA	-0.181224	0.185079	0.196386
Atp10a	NM_009728	ATP10A	NA	-0.151431	0.197188	0.528748
Atp11a	NR_121603	ATP11A	NA	-0.416232	0.650136	-0.295896
Atp11a	NM_015804	ATP11A	NA	-0.416232	0.650136	-0.295896
Atp11a	NM_001293668	ATP11A	NA	-0.416232	0.650136	-0.295896
Atp11a	NM_001293667	ATP11A	NA	-0.416232	0.650136	-0.295896
Atp11b	NM_029570	ATP11B	0.234823	-0.0409063	0.130521	0.164056
Atp11c	NM_001037863	ATP11C	-0.475333	0.183903	0.587953	0.19976
Atp11c	NM_001001798	ATP11C	-0.475333	0.183903	0.587953	0.19976
Atp13a1	NM_133224	ATP13A1	-0.172834	-0.292818	0.119238	0.407421
Atp13a2	NM_029097	ATP13A2	-0.0779457	0.0611939	0.0813297	NA
Atp13a2	NM_001164366	ATP13A2	-0.0779457	0.0611939	0.0813297	NA
Atp13a3	NM_001128094	ATP13A3	-0.174841	-0.272135	0.0463347	-0.358225
Atp13a3	NM_001128096	ATP13A3	-0.174841	-0.272135	0.0463347	-0.358225
Atp1a1	NM_144900	ATP1A1	-0.295957	-0.411069	0.153243	0.331342
Atp1b1	NM_009721	ATP1B1	NA	-0.10315	NA	NA
Atp1b3	NM_007502	ATP1B3	0.350822	0.101046	0.0381449	-0.00325705
Atp2a3	NM_001163337	ATP2A3	-0.44988	0.423371	-0.217799	0.334998
Atp2a3	NM_016745	ATP2A3	-0.44988	0.423371	-0.217799	0.334998
Atp2a3	NM_001163336	ATP2A3	-0.44988	0.423371	-0.217799	0.334998
Atp2b1	NM_026482	ATP2B1	0.702312	NA	NA	NA
Atp2c1	NM_001253834	ATP2C1	-0.393174	0.143158	0.0544491	-0.0431591
Atp2c1	NM_001253836	ATP2C1	-0.393174	0.143158	0.0544491	-0.0431591
Atp2c1	NM_001253831	ATP2C1	-0.393174	0.143158	0.0544491	-0.0431591
Atp2c1	NM_175025	ATP2C1	-0.393174	0.143158	0.0544491	-0.0431591
Atp5a1	NM_007505	ATP5A1	-0.301409	-0.223139	0.032529	-0.0210184
Atp5b	NM_016774	ATP5B	-0.262495	-0.155069	-0.0415958	0.362902
Atp5c1	NM_020615	ATP5C1	-0.456236	0.499297	0.0641278	0.1482
Atp5c1	NM_001112738	ATP5C1	-0.456236	0.499297	0.0641278	0.1482
Atp5d	NM_001347092	ATP5D	-0.356436	-0.081717	-0.0405757	0.58624
Atp5d	NM_025313	ATP5D	-0.356436	-0.081717	-0.0405757	0.58624
Atp5f1	NM_001304719	ATP5F1	-0.402937	-0.131346	-0.140992	-0.0582516
Atp5f1	NM_009725	ATP5F1	-0.402937	-0.131346	-0.140992	-0.0582516
Atp5g1	NM_001161419	ATP5G1	NA	-0.522941	0.104813	0.0766652
Atp5g1	NM_007506	ATP5G1	NA	-0.522941	0.104813	0.0766652
Atp5g2	NM_026468	ATP5G2	NA	0.0579273	-0.0509831	0.0704053
Atp5g3	NM_001301722	ATP5G3	-0.332411	-0.106896	0.076711	0.0555879
Atp5g3	NM_001301721	ATP5G3	-0.332411	-0.106896	0.076711	0.0555879
Atp5g3	NM_175015	ATP5G3	-0.332411	-0.106896	0.076711	0.0555879
Atp5j	NM_001302214	ATP5J	-0.563347	-0.269719	-0.0665221	-0.00592291
Atp5j	NM_016755	ATP5J	-0.563347	-0.269719	-0.0665221	-0.00592291
Atp5j	NM_001302213	ATP5J	-0.563347	-0.269719	-0.0665221	-0.00592291
Atp5j	NM_001302215	ATP5J	-0.563347	-0.269719	-0.0665221	-0.00592291
Atp5j	NM_001302216	ATP5J	-0.563347	-0.269719	-0.0665221	-0.00592291
Atp5j2	NM_020582	ATP5J2	-0.267752	-0.164019	-0.00723757	0.318916
Atp5k	NM_007507	ATP5I	NA	-0.318633	0.0286322	0.190601
Atp5s	NM_026536	ATP5S	NA	0.0575818	NA	NA
Atp5sl	NM_025504	ATP5SL	0.356766	0.209095	0.242581	0.390473
Atp5sl	NM_001290487	ATP5SL	0.356766	0.209095	0.242581	0.390473
Atp6ap1	NM_018794	ATP6AP1	0.208389	0.161611	-0.00601043	0.337706
Atp6ap2	NM_027439	ATP6AP2	0.0475816	-0.21752	-0.0713545	-0.156696
Atp6v0a1	NM_001243049	ATP6V0A1	-0.313164	NA	NA	NA
Atp6v0a1	NM_016920	ATP6V0A1	-0.313164	NA	NA	NA
Atp6v0a1	NM_001243051	ATP6V0A1	-0.313164	NA	NA	NA
Atp6v0a1	NM_001243050	ATP6V0A1	-0.313164	NA	NA	NA
Atp6v0a2	NM_011596	ATP6V0A2	-0.0708711	-0.0789767	0.111167	0.224853
Atp6v0b	NM_033617	ATP6V0B	0.127735	0.575517	-0.0109717	0.443054
Atp6v0c	NM_009729	ATP6V0C	NA	-0.0806174	-0.0619215	0.267444
Atp6v0d1	NM_013477	ATP6V0D1	-0.0114074	0.429337	-0.170157	0.610873
Atp6v0e	NM_025272	ATP6V0E1	-0.2428	0.217042	-0.115931	0.0537688
Atp6v1a	NM_007508	ATP6V1A	-0.276025	0.0163742	0.0417153	-0.314729
Atp6v1b2	NM_007509	ATP6V1B2	-0.303209	-0.0679144	-0.139267	0.155258
Atp6v1c1	NM_025494	ATP6V1C1	-0.00574047	-0.0555425	0.0954987	0.102968
Atp6v1d	NM_023721	ATP6V1D	-0.022589	0.419524	-0.368426	0.00809452
Atp6v1e1	NM_007510	ATP6V1E1	-0.506164	0.159221	NA	-0.180744
Atp6v1f	NM_025381	ATP6V1F	-0.153734	-0.0110312	-0.160968	0.0931847
Atp6v1g1	NM_024173	ATP6V1G1	NA	0.221398	0.433551	0.567734
Atp6v1h	NM_133826	ATP6V1H	-0.184438	-0.0287278	0.0462114	-0.251312
Atp6v1h	NM_001310442	ATP6V1H	-0.184438	-0.0287278	0.0462114	-0.251312
Atp7a	NM_009726	ATP7A	0.391264	0.0880816	NA	0.183531
Atp7a	NM_001109757	ATP7A	0.391264	0.0880816	NA	0.183531
Atp8a1	NM_001284345	ATP8A1	-0.049827	0.0383459	NA	NA
Atp8a1	NM_009727	ATP8A1	-0.049827	0.0383459	NA	NA
Atp8a1	NM_001038999	ATP8A1	-0.049827	0.0383459	NA	NA
Atp8b2	NM_001081182	ATP8B2	-0.535943	-0.00537899	-0.30543	0.0560817
Atp9a	NM_001289445	ATP9A	NA	0.537703	NA	NA
Atp9a	NM_015731	ATP9A	NA	0.537703	NA	NA
Atp9a	NM_001289446	ATP9A	NA	0.537703	NA	NA
Atp9b	NM_015805	ATP9B	0.0796591	1.09407	0.229361	0.56635
Atp9b	NM_001201569	ATP9B	0.0796591	1.09407	0.229361	0.56635
Atpaf2	NM_145427	ATPAF2	-0.601988	-0.198457	-0.0522656	0.305224
Atpif1	NM_007512	ATPIF1	-0.180673	-0.19195	-0.0653949	0.0118411
Atr	NM_019864	ATR	-0.146945	-0.0962378	0.394905	-0.137913
Atraid	NM_027855	ATRAID	-0.320172	0.203718	-0.348203	0.0593706
Atraid	NM_212470	ATRAID	-0.320172	0.203718	-0.348203	0.0593706
Atrn	NM_009730	ATRN	-0.2603	NA	NA	NA
Atrx	NM_009530	ATRX	0.392665	0.016559	0.320408	-0.439308
Atxn10	NM_016843	ATXN10	-0.190205	0.107885	-0.0543938	0.0903264
Atxn2	NM_009125	ATXN2	0.0217287	0.00349832	0.388963	-0.192992
Atxn2l	NM_183020	ATXN2L	-0.112805	NA	NA	NA
Atxn2l	NM_001347658	ATXN2L	-0.112805	NA	NA	NA
Atxn3	NM_029705	ATXN3L	-0.0632634	NA	NA	NA
Atxn3	NM_001167914	ATXN3L	-0.0632634	NA	NA	NA
Atxn7	NM_139227	ATXN7	NA	0.219841	NA	NA
Atxn7l1	NM_001033436	ATXN7L1	NA	0.268713	-0.152417	-0.451601
Atxn7l1	NM_028139	ATXN7L1	NA	0.268713	-0.152417	-0.451601
Atxn7l3	NM_001098837	ATXN7L3	NA	0.0755178	-0.15744	0.362584
Atxn7l3	NM_001098836	ATXN7L3	NA	0.0755178	-0.15744	0.362584
AU040320	NM_001035525	KIAA0319L	-0.636299	-0.0538172	-0.334453	-0.149424
AU040320	NM_133886	KIAA0319L	-0.636299	-0.0538172	-0.334453	-0.149424
AU040320	NM_001035526	KIAA0319L	-0.636299	-0.0538172	-0.334453	-0.149424
Auh	NM_016709	AUH	-0.0488401	0.50632	NA	NA
Aup1	NR_125891	AUP1	0.112152	0.194753	0.0168049	-0.0302875
Aup1	NM_001301649	AUP1	0.112152	0.194753	0.0168049	-0.0302875
Aup1	NM_007517	AUP1	0.112152	0.194753	0.0168049	-0.0302875
Aurka	NM_001291185	AURKA	-0.734739	-0.855395	0.0182972	0.203561
Aurka	NM_011497	AURKA	-0.734739	-0.855395	0.0182972	0.203561
Aurkaip1	NM_025338	AURKAIP1	-0.091275	-0.202791	0.112502	0.198316
Aurkb	NM_011496	AURKB	-0.470788	-0.463367	-0.0339054	-0.0341191
Avl9	NM_030235	AVL9	-0.187635	0.553491	-0.198851	-0.404863
Avpi1	NM_027106	AVPI1	NA	0.248216	-0.126365	0.367466
AW209491	NM_134067	C7orf25	NA	-0.812849	0.206353	-0.353064
AW209491	NM_001104646	C7orf25	NA	-0.812849	0.206353	-0.353064
AW549877	NM_145930	C5orf51	0.257099	0.379442	0.0493517	-0.251277
Axin1	NM_009733	AXIN1	-0.00027916	-0.135269	-0.0727876	0.00291939
Axin1	NM_001159598	AXIN1	-0.00027916	-0.135269	-0.0727876	0.00291939
Axl	NM_001190975	AXL	NA	0.108975	-0.00127926	0.218779
Axl	NM_001190974	AXL	NA	0.108975	-0.00127926	0.218779
Axl	NM_009465	AXL	NA	0.108975	-0.00127926	0.218779
Azi2	NM_001286508	AZI2	-0.00264827	0.0413268	0.0743834	0.175158
Azi2	NM_013727	AZI2	-0.00264827	0.0413268	0.0743834	0.175158
Azi2	NM_001048146	AZI2	-0.00264827	0.0413268	0.0743834	0.175158
Azi2	NM_001286507	AZI2	-0.00264827	0.0413268	0.0743834	0.175158
Azin1	NM_001102458	AZIN1	0.0887935	-0.216005	0.106798	-0.292501
Azin1	NM_001301688	AZIN1	0.0887935	-0.216005	0.106798	-0.292501
Azin1	NM_018745	AZIN1	0.0887935	-0.216005	0.106798	-0.292501
Azin1	NR_125913	AZIN1	0.0887935	-0.216005	0.106798	-0.292501
B230219D22Rik	NM_181278	C5orf24	0.0847957	-0.0266783	-0.0742755	-0.161123
B2m	NM_009735	B2M	-0.0617003	0.0903528	-0.0609619	0.0482864
B3galnt2	NM_178640	B3GALNT2	NA	-0.114791	-0.0138666	-0.143537
B3gat3	NM_024256	B3GAT3	NA	-0.0523839	NA	NA
B3gnt2	NM_001169114	B3GNT2	-0.206078	NA	NA	NA
B3gnt2	NM_016888	B3GNT2	-0.206078	NA	NA	NA
B3gnt5	NM_054052	B3GNT5	0.232317	-0.124042	NA	NA
B3gnt5	NM_001159407	B3GNT5	0.232317	-0.124042	NA	NA
B3gnt5	NM_001159408	B3GNT5	0.232317	-0.124042	NA	NA
B3gnt7	NM_145222	B3GNT7	0.0968663	NA	NA	NA
B3gntl1	NM_178664	B3GNTL1	NA	-0.0616811	NA	NA
B4galnt1	NM_008080	B4GALNT1	-0.6725	0.128416	-0.0201621	0.106146
B4galnt1	NM_001244617	B4GALNT1	-0.6725	0.128416	-0.0201621	0.106146
B4galnt1	NR_045166	B4GALNT1	-0.6725	0.128416	-0.0201621	0.106146
B4galnt1	NM_001244618	B4GALNT1	-0.6725	0.128416	-0.0201621	0.106146
B4galnt1	NM_027739	B4GALNT1	-0.6725	0.128416	-0.0201621	0.106146
B4galt1	NM_022305	B4GALT1	-0.38397	0.0991932	-0.113192	-0.466973
B4galt3	NM_020579	B4GALT3	NA	0.549569	0.0415246	-0.179911
B4galt5	NM_019835	B4GALT5	-0.229725	NA	NA	NA
B4galt7	NM_146045	B4GALT7	NA	0.27498	NA	NA
B4galt7	NM_001311137	B4GALT7	NA	0.27498	NA	NA
B4gat1	NM_175383	B4GAT1	NA	-0.507114	-0.397223	-0.538719
B9d1	NM_001330780	B9D1	NA	-0.190905	-0.102714	0.0847131
B9d1	NM_001330781	B9D1	NA	-0.190905	-0.102714	0.0847131
B9d1	NM_013717	B9D1	NA	-0.190905	-0.102714	0.0847131
B9d2	NM_172148	B9D2	NA	-0.387973	0.111447	0.388065
Bach1	NM_007520	BACH1	0.753579	0.75892	NA	0.95635
Bach2	NM_001109661	BACH2	0.134086	0.16152	-0.0246679	-0.22905
Bad	NM_007522	BAD	NA	0.123438	-0.401134	0.224519
Bad	NM_001285453	BAD	NA	0.123438	-0.401134	0.224519
Bag1	NM_009736	BAG1	-0.717005	-0.357059	0.0168599	0.125377
Bag1	NM_001171739	BAG1	-0.717005	-0.357059	0.0168599	0.125377
Bag2	NM_145392	BAG2	NA	0.00339872	0.465147	0.721868
Bag3	NM_013863	BAG3	NA	0.174008	NA	NA
Bag4	NM_026121	BAG4	NA	-0.18134	0.13372	-0.00531723
Bag6	NM_001252468	BAG6	-0.352477	0.130698	0.184185	0.291759
Bag6	NM_001252469	BAG6	-0.352477	0.130698	0.184185	0.291759
Bag6	NM_057171	BAG6	-0.352477	0.130698	0.184185	0.291759
Bahd1	NM_001045523	BAHD1	0.12801	NA	NA	NA
Bak1	NM_007523	BAK1	-0.241864	-0.0743515	-0.0247666	-0.292209
Bambi	NM_026505	BAMBI	0.00784329	0.299967	NA	NA
Banf1	NM_001286608	BANF1	-0.325445	-0.560751	0.106952	0.718396
Banf1	NM_011793	BANF1	-0.325445	-0.560751	0.106952	0.718396
Banf1	NR_104482	BANF1	-0.325445	-0.560751	0.106952	0.718396
Banf1	NM_001038231	BANF1	-0.325445	-0.560751	0.106952	0.718396
Bank1	NM_001310749	BANK1	-0.201478	NA	NA	NA
Bank1	NM_001033350	BANK1	-0.201478	NA	NA	NA
Banp	NM_001285983	BANP	-0.141845	0.171243	-0.116453	NA
Banp	NM_001110100	BANP	-0.141845	0.171243	-0.116453	NA
Banp	NM_016812	BANP	-0.141845	0.171243	-0.116453	NA
Banp	NM_001285981	BANP	-0.141845	0.171243	-0.116453	NA
Bap1	NM_027088	BAP1	-0.519343	-0.0911693	0.0281198	-0.0271957
Bard1	NM_007525	BARD1	-0.411743	NA	NA	NA
Basp1	NM_027395	BASP1	0.738622	NA	NA	NA
Batf	NM_016767	BATF	-0.644402	0.80947	0.222038	0.65641
Batf3	NM_030060	BATF3	NA	0.0071996	-0.100255	0.542144
Bax	NM_007527	BAX	-0.379925	-0.304308	-0.0797039	0.118433
Baz1a	NM_013815	BAZ1A	0.0841034	NA	NA	NA
Baz1b	NM_011714	BAZ1B	-0.0910608	-0.235753	0.100503	0.0973363
Baz2a	NM_054078	BAZ2A	-0.333535	0.367189	NA	NA
Baz2b	NM_001001182	BAZ2B	0.121794	0.601077	-0.471536	-0.168472
Bbs2	NM_026116	BBS2	NA	-0.0639055	NA	NA
Bbs9	NM_178415	BBS9	NA	0.939477	NA	0.15704
Bbs9	NM_181316	BBS9	NA	0.939477	NA	0.15704
Bbx	NM_027444	BBX	0.0576179	-0.0148377	NA	NA
Bbx	NM_001347240	BBX	0.0576179	-0.0148377	NA	NA
BC003331	NM_001077237	C1orf27	0.129262	0.221697	0.00403399	-0.608368
BC003331	NM_145511	C1orf27	0.129262	0.221697	0.00403399	-0.608368
BC003965	NM_183150	C16orf91	NA	-0.353111	0.0693933	-0.0582613
BC004004	NM_030561	C6orf89	-0.545211	-0.0877975	0.0382714	0.218866
BC005537	NM_024473	C6orf62	0.800791	0.0263775	0.0124864	-0.0657539
BC005624	NM_144885	C9orf78	NA	-0.0332414	-0.130265	0.15524
BC017158	NM_145590	C16orf58	NA	0.0844586	NA	NA
BC017643	NM_001252549	C17orf62	-0.282712	0.338976	-0.115474	0.158623
BC017643	NM_001252550	C17orf62	-0.282712	0.338976	-0.115474	0.158623
BC017643	NM_144832	C17orf62	-0.282712	0.338976	-0.115474	0.158623
BC017643	NM_001252548	C17orf62	-0.282712	0.338976	-0.115474	0.158623
BC017643	NM_001254735	C17orf62	-0.282712	0.338976	-0.115474	0.158623
BC031181	NM_001001181	C18orf32	NA	0.0149808	-0.162346	0.0537089
BC037034	NM_153161	C7orf43	NA	0.0934792	NA	NA
BC048403	NM_173022	C12orf66	NA	-0.332627	NA	NA
BC055324	NM_201364	C1orf112	-0.00610383	NA	NA	NA
Bcap29	NM_007530	BCAP29	-0.347409	-0.772011	-0.126474	-0.545234
Bcap29	NM_001164090	BCAP29	-0.347409	-0.772011	-0.126474	-0.545234
Bcap31	NM_012060	BCAP31	0.0699559	-0.133759	-0.0653855	0.304145
Bcap31	NM_001313698	BCAP31	0.0699559	-0.133759	-0.0653855	0.304145
Bcar1	NM_009954	BCAR1	NA	-0.117302	NA	NA
Bcar1	NM_001198839	BCAR1	NA	-0.117302	NA	NA
Bcar3	NM_013867	BCAR3	-0.33827	0.0483378	NA	-2.1066
Bcas2	NM_026602	BCAS2	-0.260918	-0.237239	-0.0317768	0.145352
Bcas3	NM_001166642	BCAS3	0.13244	-0.0246335	NA	NA
Bcas3	NM_001166643	BCAS3	0.13244	-0.0246335	NA	NA
Bcas3	NM_138681	BCAS3	0.13244	-0.0246335	NA	NA
Bcat1	NM_001024468	BCAT1	-1.11006	-0.671079	-0.0144062	-0.0386773
Bcat1	NM_007532	BCAT1	-1.11006	-0.671079	-0.0144062	-0.0386773
Bcat2	NM_001243052	BCAT2	-0.139703	-0.110462	0.569214	NA
Bcat2	NM_009737	BCAT2	-0.139703	-0.110462	0.569214	NA
Bcat2	NM_001243053	BCAT2	-0.139703	-0.110462	0.569214	NA
Bccip	NM_025392	BCCIP	-0.322812	-0.641866	0.137295	-0.233181
Bcdin3d	NM_029236	BCDIN3D	NA	-0.485874	0.0952753	0.190818
Bckdha	NM_007533	BCKDHA	-0.102745	0.118669	-0.496992	NA
Bckdhb	NM_199195	BCKDHB	NA	-0.343023	0.0872942	NA
Bckdhb	NM_001305935	BCKDHB	NA	-0.343023	0.0872942	NA
Bckdk	NM_009739	BCKDK	NA	-0.132427	0.1964	0.638462
Bcl10	NM_009740	BCL10	-0.0376523	-0.343606	-0.172045	-0.317285
Bcl11a	NM_001242934	BCL11A	-0.635849	NA	NA	NA
Bcl11a	NM_001159289	BCL11A	-0.635849	NA	NA	NA
Bcl11a	NM_001159290	BCL11A	-0.635849	NA	NA	NA
Bcl11a	NM_016707	BCL11A	-0.635849	NA	NA	NA
Bcl11b	NM_001286343	BCL11B	NA	0.143834	-0.150345	0.245004
Bcl11b	NM_021399	BCL11B	NA	0.143834	-0.150345	0.245004
Bcl11b	NM_001079883	BCL11B	NA	0.143834	-0.150345	0.245004
Bcl2	NM_177410	BCL2	0.0870767	-0.0136655	-0.232507	0.194949
Bcl2	NM_009741	BCL2	0.0870767	-0.0136655	-0.232507	0.194949
Bcl2l1	NM_001289739	BCL2L1	-0.447737	-0.304104	0.463226	-0.0260684
Bcl2l1	NM_001289717	BCL2L1	-0.447737	-0.304104	0.463226	-0.0260684
Bcl2l1	NM_009743	BCL2L1	-0.447737	-0.304104	0.463226	-0.0260684
Bcl2l1	NM_001289716	BCL2L1	-0.447737	-0.304104	0.463226	-0.0260684
Bcl2l11	NM_001284410	BCL2L11	0.271739	0.918853	0.671735	0.066756
Bcl2l11	NM_207680	BCL2L11	0.271739	0.918853	0.671735	0.066756
Bcl2l11	NM_207681	BCL2L11	0.271739	0.918853	0.671735	0.066756
Bcl2l11	NM_009754	BCL2L11	0.271739	0.918853	0.671735	0.066756
Bcl2l11	NM_001291016	BCL2L11	0.271739	0.918853	0.671735	0.066756
Bcl2l13	NM_153516	BCL2L13	-0.20461	-0.187165	-0.432947	-0.389375
Bcl2l14	NM_025778	BCL2L14	NA	0.708269	NA	0.613665
Bcl3	NM_033601	BCL3	-0.0382696	1.03996	-0.022225	0.729
Bcl6	NM_009744	BCL6	0.407039	1.15121	NA	0.00950565
Bcl6	NM_001348026	BCL6	0.407039	1.15121	NA	0.00950565
Bcl6b	NM_007528	BCL6B	NA	-0.181811	NA	NA
Bcl7b	NM_009745	BCL7B	NA	0.377772	-0.109888	-0.0762253
Bcl7c	NM_001347652	BCL7C	NA	-0.319253	0.142839	0.894132
Bcl7c	NM_009746	BCL7C	NA	-0.319253	0.142839	0.894132
Bcl9	NM_029933	BCL9	0.516789	-0.0469786	NA	-0.236006
Bcl9l	NM_030256	BCL9L	-0.266439	-0.106965	NA	NA
Bclaf1	NM_001025393	BCLAF1	0.155741	0.149815	0.110847	-0.266068
Bclaf1	NM_153787	BCLAF1	0.155741	0.149815	0.110847	-0.266068
Bclaf1	NM_001025392	BCLAF1	0.155741	0.149815	0.110847	-0.266068
Bcor	NM_001168321	BCOR	0.0141035	NA	NA	NA
Bcor	NM_175046	BCOR	0.0141035	NA	NA	NA
Bcor	NM_029510	BCOR	0.0141035	NA	NA	NA
Bcor	NM_175044	BCOR	0.0141035	NA	NA	NA
Bcor	NM_175045	BCOR	0.0141035	NA	NA	NA
Bcor	NR_045434	BCOR	0.0141035	NA	NA	NA
Bcr	NM_001081412	BCR	-0.188077	0.352222	NA	NA
Bcs1l	NM_001305652	BCS1L	NA	-0.450351	-0.0254464	-0.213514
Bcs1l	NM_025784	BCS1L	NA	-0.450351	-0.0254464	-0.213514
Bdh1	NM_001122683	BDH1	NA	-0.512819	0.354378	0.225062
Bdh1	NM_175177	BDH1	NA	-0.512819	0.354378	0.225062
Bdp1	NM_001081061	BDP1	-0.308815	NA	NA	NA
Becn1	NM_019584	BECN1	-0.346285	0.0320028	-0.112587	-0.0390898
Bend5	NR_033793	BEND5	-0.940478	NA	NA	NA
Bend5	NM_026279	BEND5	-0.940478	NA	NA	NA
Bet1	NM_009748	BET1	NA	0.011711	-0.379661	-0.167457
Bfar	NM_025976	BFAR	-0.129031	0.221633	-0.174898	-0.39102
Bfar	NM_001177552	BFAR	-0.129031	0.221633	-0.174898	-0.39102
Bfar	NM_025653	BFAR	-0.129031	0.221633	-0.174898	-0.39102
Bhlhe40	NM_011498	BHLHE40	0.382552	0.230985	-0.0196042	0.158583
Bicd2	NM_001039179	BICD2	-0.230297	0.0618422	NA	NA
Bicd2	NM_029791	BICD2	-0.230297	0.0618422	NA	NA
Bicd2	NM_001039180	BICD2	-0.230297	0.0618422	NA	NA
Bid	NM_007544	BID	NA	-0.388683	0.402685	-0.31337
Bik	NM_007546	BIK	NA	-0.357707	NA	NA
Bin1	NM_009668	BIN1	-0.0885626	0.238236	-0.008342	0.203357
Bin1	NM_001083334	BIN1	-0.0885626	0.238236	-0.008342	0.203357
Bin3	NM_021328	BIN3	0.245928	0.363154	-0.0196087	0.467141
Birc2	NM_007465	BIRC2	-0.0851678	0.56853	-0.163775	-0.514452
Birc2	NM_001291503	BIRC2	-0.0851678	0.56853	-0.163775	-0.514452
Birc3	NM_007464	BIRC3	0.174739	0.611587	0.140217	0.0953737
Birc5	NM_009689	BIRC5	-0.630791	-0.378875	-0.248771	0.0156371
Birc5	NM_001012273	BIRC5	-0.630791	-0.378875	-0.248771	0.0156371
Birc6	NM_007566	BIRC6	-0.0665759	0.0201044	NA	NA
Blk	NM_007549	BLK	-0.719462	NA	NA	NA
Blm	NM_001042527	BLM	-0.141836	-0.423691	0.0037557	0.0387376
Blm	NM_007550	BLM	-0.141836	-0.423691	0.0037557	0.0387376
Blmh	NM_178645	BLMH	-0.278724	-0.32898	0.347009	-0.0363359
Blnk	NM_008528	BLNK	-0.210725	0.512358	NA	-0.856072
Bloc1s5	NM_139063	BLOC1S5-TXNDC5	NA	-0.207736	-0.000671816	-0.113644
Bloc1s6	NM_019788	BLOC1S6	0.120866	0.265503	-0.360315	0.0187491
Blvra	NM_026678	BLVRA	-0.0718839	-0.413671	0.0566805	0.163433
Blvrb	NM_001290525	BLVRB	-0.428028	-0.210837	NA	NA
Blvrb	NM_144923	BLVRB	-0.428028	-0.210837	NA	NA
Blzf1	NM_025505	BLZF1	NA	-0.173194	0.0243102	-0.176623
Blzf1	NM_001160209	BLZF1	NA	-0.173194	0.0243102	-0.176623
Blzf1	NM_001160208	BLZF1	NA	-0.173194	0.0243102	-0.176623
Bmp2	NM_007553	BMP2	NA	NA	NA	-0.700709
Bmp2k	NM_080708	BMP2K	0.189356	0.257962	-0.584982	-0.0310775
Bmpr1a	NM_009758	BMPR1A	NA	-0.0151714	0.0401872	0.0882193
Bmpr2	NM_007561	BMPR2	NA	-0.102931	NA	NA
Bms1	NM_194339	BMS1	-0.313695	-0.615862	0.244779	-0.329534
Bmt2	NM_175312	BMT2	0.553882	NA	NA	NA
Bmyc	NM_023326	MYC	NA	-0.390082	-0.0301366	0.213981
Bnip1	NM_172149	BNIP1	-0.0566171	0.0404624	0.202159	0.477102
Bnip2	NM_001008238	BNIP2	-0.0195331	-0.105354	-0.0337557	-0.0609719
Bnip2	NM_016787	BNIP2	-0.0195331	-0.105354	-0.0337557	-0.0609719
Bnip3	NM_009760	BNIP3	NA	-0.115055	0.125069	0.35047
Bnip3l	NM_009761	BNIP3L	NA	NA	-0.0656874	0.369831
Bod1l	NM_001310601	BOD1L1	-0.087805	-0.0427297	0.324247	-0.199157
Bod1l	NM_001081422	BOD1L1	-0.087805	-0.0427297	0.324247	-0.199157
Bok	NM_016778	BOK	NA	-0.187643	NA	NA
Bop1	NM_013481	BOP1	-0.416712	-0.765136	0.0774267	0.0972038
Borcs5	NM_001170479	BORCS5	NA	0.0690722	-0.0188797	0.429546
Borcs5	NM_026371	BORCS5	NA	0.0690722	-0.0188797	0.429546
Bpgm	NM_007563	BPGM	NA	-0.683552	-0.0146702	0.112277
Bphl	NM_026512	BPHL	NA	0.0523278	NA	NA
Bpnt1	NM_001347210	BPNT1	NA	-0.325929	-0.0753712	-0.0897915
Bpnt1	NM_001347212	BPNT1	NA	-0.325929	-0.0753712	-0.0897915
Bpnt1	NM_011794	BPNT1	NA	-0.325929	-0.0753712	-0.0897915
Bptf	NM_176850	BPTF	-0.383471	0.42863	-0.0550899	-0.370924
Braf	NM_139294	BRAF	0.0935094	-0.0981988	NA	NA
Brap	NM_001289544	BRAP	0.195743	0.421798	0.333462	0.423981
Brap	NM_001289543	BRAP	0.195743	0.421798	0.333462	0.423981
Brap	NM_028227	BRAP	0.195743	0.421798	0.333462	0.423981
Brat1	NM_001276287	BRAT1	NA	0.205217	NA	NA
Brat1	NR_074085	BRAT1	NA	0.205217	NA	NA
Brat1	NM_181066	BRAT1	NA	0.205217	NA	NA
Brca1	NM_009764	BRCA1	-0.109045	-0.267503	0.22811	-0.0550707
Brca2	NM_001081001	BRCA2	NA	-0.880276	0.062305	-0.101129
Brca2	NM_009765	BRCA2	NA	-0.880276	0.062305	-0.101129
Brcc3	NM_145956	BRCC3	-0.369294	-0.270387	0.046115	-0.695648
Brcc3	NM_001166459	BRCC3	-0.369294	-0.270387	0.046115	-0.695648
Brcc3	NM_001166457	BRCC3	-0.369294	-0.270387	0.046115	-0.695648
Brd1	NM_001033274	BRD1	0.38928	0.723226	0.112854	-0.0448376
Brd2	NM_001204973	BRD2	0.0327167	0.0966076	0.109845	0.248526
Brd2	NM_010238	BRD2	0.0327167	0.0966076	0.109845	0.248526
Brd2	NR_037970	BRD2	0.0327167	0.0966076	0.109845	0.248526
Brd3	NM_001113574	BRD3	-0.565692	-0.0656534	0.126369	-0.130137
Brd3	NM_023336	BRD3	-0.565692	-0.0656534	0.126369	-0.130137
Brd3	NM_001113573	BRD3	-0.565692	-0.0656534	0.126369	-0.130137
Brd4	NM_001286630	BRD4	-0.122776	0.16542	-0.0357715	-0.121702
Brd4	NM_020508	BRD4	-0.122776	0.16542	-0.0357715	-0.121702
Brd4	NM_198094	BRD4	-0.122776	0.16542	-0.0357715	-0.121702
Brd7	NM_012047	BRD7	-0.390496	-0.161905	0.135995	-0.0586787
Brd8	NM_001289606	BRD8	-0.267997	0.0029696	-0.0169246	-0.0581038
Brd8	NM_030147	BRD8	-0.267997	0.0029696	-0.0169246	-0.0581038
Brd8	NM_001289607	BRD8	-0.267997	0.0029696	-0.0169246	-0.0581038
Brdt	NM_001079873	BRDT	NA	0.352051	NA	NA
Brdt	NM_054054	BRDT	NA	0.352051	NA	NA
Bre	NM_181282	BRE	-0.0750512	0.511042	0.00243967	0.438416
Bre	NM_181281	BRE	-0.0750512	0.511042	0.00243967	0.438416
Bre	NM_181279	BRE	-0.0750512	0.511042	0.00243967	0.438416
Bre	NM_144541	BRE	-0.0750512	0.511042	0.00243967	0.438416
Bre	NM_181280	BRE	-0.0750512	0.511042	0.00243967	0.438416
Bri3	NM_001163709	BRI3	NA	-0.321596	-0.247851	0.354488
Bri3	NM_018772	BRI3	NA	-0.321596	-0.247851	0.354488
Bri3bp	NM_029752	BRI3BP	-0.352079	NA	NA	NA
Brip1	NM_178309	BRIP1	-0.222279	NA	NA	NA
Brix1	NM_026396	BRIX1	0.0754478	-0.573021	0.115207	-0.342238
Brk1	NM_133937	BRK1	0.192479	0.0104961	0.00372628	0.234705
Brms1	NM_134155	BRMS1	NA	0.0233342	-0.0935022	NA
Brpf1	NM_001282128	BRPF1	0.1314	-0.111613	0.0812212	0.087626
Brpf1	NM_030178	BRPF1	0.1314	-0.111613	0.0812212	0.087626
Brpf1	NM_001282127	BRPF1	0.1314	-0.111613	0.0812212	0.087626
Brpf1	NM_001282126	BRPF1	0.1314	-0.111613	0.0812212	0.087626
Brwd1	NM_176928	BRWD1	0.0361574	0.350774	NA	NA
Brwd1	NM_145125	BRWD1	0.0361574	0.350774	NA	NA
Brwd1	NM_001103179	BRWD1	0.0361574	0.350774	NA	NA
Brwd3	NM_001081477	BRWD3	0.218825	NA	NA	NA
Bscl2	NM_008144	BSCL2	NA	0.204586	-0.401397	0.0722244
Bscl2	NM_001290823	BSCL2	NA	0.204586	-0.401397	0.0722244
Bscl2	NM_001136064	BSCL2	NA	0.204586	-0.401397	0.0722244
Bsdc1	NM_133889	BSDC1	-0.245679	0.190257	-0.086965	0.0852702
Bsg	NM_001077184	BSG	-0.272413	0.21831	0.0109032	0.987595
Bsg	NM_009768	BSG	-0.272413	0.21831	0.0109032	0.987595
Bspry	NM_138653	BSPRY	NA	0.22267	NA	NA
Bst2	NM_198095	BST2	0.104162	-1.11758	-0.0707508	-0.0853156
Btaf1	NM_001080706	BTAF1	-0.00227973	NA	NA	NA
Btbd1	NM_146193	BTBD1	NA	-0.0869852	-0.095929	-0.0763778
Btbd10	NM_133700	BTBD10	NA	-0.0753974	-0.138524	-0.0770218
Btbd2	NM_145361	BTBD2	NA	0.128252	NA	NA
Btbd7	NM_172806	BTBD7	0.0136449	NA	NA	NA
Btbd9	NM_172618	BTBD9	0.39529	NA	NA	NA
Btbd9	NM_027060	BTBD9	0.39529	NA	NA	NA
Btd	NM_025295	BTD	NA	0.143341	NA	NA
Btf3	NM_145455	BTF3	-0.369652	0.247573	-0.00602048	-0.0374019
Btf3	NM_001170540	BTF3	-0.369652	0.247573	-0.00602048	-0.0374019
Btf3l4	NM_027453	BTF3L4	NA	-0.232573	-0.208822	-0.121732
Btg2	NM_007570	BTG2	NA	0.478345	-0.433924	0.19684
Btk	NM_013482	BTK	-0.0883439	-0.294089	NA	NA
Btla	NM_001037719	BTLA	0.453554	NA	NA	NA
Btla	NM_177584	BTLA	0.453554	NA	NA	NA
Btrc	NM_001037758	BTRC	0.161434	0.0298123	NA	NA
Btrc	NM_001286465	BTRC	0.161434	0.0298123	NA	NA
Btrc	NM_001286466	BTRC	0.161434	0.0298123	NA	NA
Btrc	NM_009771	BTRC	0.161434	0.0298123	NA	NA
Bub1	NM_009772	BUB1	-0.246962	-0.654024	0.0887251	-0.150417
Bub1	NM_001113179	BUB1	-0.246962	-0.654024	0.0887251	-0.150417
Bub1b	NM_009773	BUB1B	-0.473276	-0.682319	0.170155	0.3015
Bub3	NM_001317350	BUB3	-0.414463	-0.0656066	-0.0534161	-0.0509972
Bub3	NM_009774	BUB3	-0.414463	-0.0656066	-0.0534161	-0.0509972
Bud13	NM_146000	BUD13	-0.254428	-0.38143	0.184561	-0.0183908
Bud31	NM_001310770	BUD31	0.16853	NA	0.0433826	-0.0543184
Bud31	NM_001008705	BUD31	0.16853	NA	0.0433826	-0.0543184
Bud31	NM_001310771	BUD31	0.16853	NA	0.0433826	-0.0543184
Bysl	NM_016859	BYSL	0.126867	-0.886586	0.18582	-0.54104
Bzw1	NM_025824	BZW1	-0.283308	-0.304556	-0.0379093	-0.132354
Bzw2	NM_025840	BZW2	-0.681962	-1.00264	0.216065	-0.681632
C1d	NM_020558	C1D	-0.219853	-0.0857899	-0.0468681	-0.0181672
C1d	NM_001330649	C1D	-0.219853	-0.0857899	-0.0468681	-0.0181672
C1galt1	NM_052993	C1GALT1	-0.574548	0.247201	-0.0869207	-0.0180169
C1qbp	NM_007573	C1QBP	-0.497069	-0.648428	0.132194	-0.218291
C1qtnf4	NM_026161	C1QTNF4	NA	0.376414	NA	NA
C1qtnf6	NM_001204153	C1QTNF6	NA	0.0524025	NA	NA
C1qtnf6	NM_028331	C1QTNF6	NA	0.0524025	NA	NA
C1qtnf6	NM_001204152	C1QTNF6	NA	0.0524025	NA	NA
C2cd2l	NM_027909	C2CD2L	NA	-0.0521717	-0.0862876	0.447395
C2cd3	NM_001017985	C2CD3	-0.651552	-0.0601106	-0.111066	-0.2298
C2cd5	NM_001109688	C2CD5	-0.458678	NA	NA	NA
C2cd5	NM_029081	C2CD5	-0.458678	NA	NA	NA
C2cd5	NM_001286578	C2CD5	-0.458678	NA	NA	NA
C2cd5	NM_029897	C2CD5	-0.458678	NA	NA	NA
C3	NM_009778	C3	NA	NA	1.04306	3.50703
C330007P06Rik	NM_029951	CXorf56	NA	-0.0725465	-0.0533502	-0.181713
C330027C09Rik	NM_172616	KIAA1524	-0.597953	-0.273599	-0.12544	-0.0951755
C87436	NM_001243742	C2orf42	NA	-0.0393808	NA	NA
C87436	NM_001243741	C2orf42	NA	-0.0393808	NA	NA
C87436	NM_146170	C2orf42	NA	-0.0393808	NA	NA
C8g	NM_001271777	C8G	NA	-0.0301939	NA	NA
C8g	NM_027062	C8G	NA	-0.0301939	NA	NA
Caap1	NM_026368	CAAP1	NA	-0.34491	-0.110985	-0.311839
Cab39	NM_133781	CAB39	-0.00135977	0.131935	0.143609	-0.149048
Cab39l	NM_026908	CAB39L	0.0943438	-0.160086	0.0809045	-0.00689027
Cabin1	NM_172549	CABIN1	-0.358548	NA	NA	NA
Cables2	NM_145851	CABLES2	NA	-0.2653	0.133743	0.0990203
Cacfd1	NM_001243239	CACFD1	NA	-0.0701857	NA	NA
Cacfd1	NM_001243240	CACFD1	NA	-0.0701857	NA	NA
Cacfd1	NM_029862	CACFD1	NA	-0.0701857	NA	NA
Cacna1a	NM_007578	CACNA1A	NA	-0.321823	NA	NA
Cacna1a	NM_001252060	CACNA1A	NA	-0.321823	NA	NA
Cacna1a	NM_001252059	CACNA1A	NA	-0.321823	NA	NA
Cacna1a	NM_001252061	CACNA1A	NA	-0.321823	NA	NA
Cacna1c	NM_001256002	CACNA1C	NA	0.499297	NA	1.12442
Cacna1c	NM_001159533	CACNA1C	NA	0.499297	NA	1.12442
Cacna1c	NM_001290335	CACNA1C	NA	0.499297	NA	1.12442
Cacna1c	NM_001255997	CACNA1C	NA	0.499297	NA	1.12442
Cacna1c	NM_001159534	CACNA1C	NA	0.499297	NA	1.12442
Cacna1c	NM_001255998	CACNA1C	NA	0.499297	NA	1.12442
Cacna1c	NM_001255999	CACNA1C	NA	0.499297	NA	1.12442
Cacna1c	NM_001256000	CACNA1C	NA	0.499297	NA	1.12442
Cacna1c	NM_001256001	CACNA1C	NA	0.499297	NA	1.12442
Cacna1c	NM_009781	CACNA1C	NA	0.499297	NA	1.12442
Cacna1c	NM_001159535	CACNA1C	NA	0.499297	NA	1.12442
Cacna1s	NM_014193	CACNA1S	NA	-0.335986	NA	NA
Cacna1s	NM_001081023	CACNA1S	NA	-0.335986	NA	NA
Cacnb3	NM_001286226	CACNB3	NA	0.351451	-0.091124	NA
Cacnb3	NM_001044741	CACNB3	NA	0.351451	-0.091124	NA
Cacnb3	NM_007581	CACNB3	NA	0.351451	-0.091124	NA
Cactin	NM_027381	CACTIN	-0.075726	NA	NA	NA
Cacul1	NM_030197	CACUL1	0.388215	0.242274	0.50577	0.0309254
Cacul1	NM_001172097	CACUL1	0.388215	0.242274	0.50577	0.0309254
Cacul1	NM_001172096	CACUL1	0.388215	0.242274	0.50577	0.0309254
Cacybp	NM_009786	CACYBP	-0.349554	-0.782107	0.0211003	-0.319952
Cad	NM_023525	CAD	-0.617649	-1.07318	0.191213	-0.288793
Cad	NM_001289523	CAD	-0.617649	-1.07318	0.191213	-0.288793
Cad	NM_001289522	CAD	-0.617649	-1.07318	0.191213	-0.288793
Cadm4	NM_153112	CADM4	NA	0.0491812	NA	NA
Calcoco1	NM_026192	CALCOCO1	-0.192033	NA	NA	NA
Calcrl	NM_018782	CALCRL	NA	0.920811	0.349451	0.457111
Calhm2	NM_133746	CALHM2	NA	-0.0111391	-0.581764	-0.0721409
Calr	NM_007591	CALR	-0.237908	0.137021	-0.190526	-0.0313119
Calu	NM_007594	CALU	-0.120821	0.182946	0.0463455	0.288706
Calu	NM_001285412	CALU	-0.120821	0.182946	0.0463455	0.288706
Calu	NM_184053	CALU	-0.120821	0.182946	0.0463455	0.288706
Camk1d	NM_177343	CAMK1D	NA	-0.209292	NA	NA
Camk1d	NM_001290374	CAMK1D	NA	-0.209292	NA	NA
Camk1d	NM_001290376	CAMK1D	NA	-0.209292	NA	NA
Camk1d	NM_001290375	CAMK1D	NA	-0.209292	NA	NA
Camk2b	NM_001174053	CAMK2B	NA	0.406542	NA	NA
Camk2b	NM_007595	CAMK2B	NA	0.406542	NA	NA
Camk2b	NM_001174054	CAMK2B	NA	0.406542	NA	NA
Camk2d	NM_001025438	CAMK2D	-0.48215	0.497849	0.131232	0.439268
Camk2d	NM_001346636	CAMK2D	-0.48215	0.497849	0.131232	0.439268
Camk2d	NM_001293663	CAMK2D	-0.48215	0.497849	0.131232	0.439268
Camk2d	NM_001346635	CAMK2D	-0.48215	0.497849	0.131232	0.439268
Camk2d	NM_001025439	CAMK2D	-0.48215	0.497849	0.131232	0.439268
Camk2d	NM_023813	CAMK2D	-0.48215	0.497849	0.131232	0.439268
Camk2d	NM_001293664	CAMK2D	-0.48215	0.497849	0.131232	0.439268
Camk2d	NM_001293666	CAMK2D	-0.48215	0.497849	0.131232	0.439268
Camk2d	NM_001293665	CAMK2D	-0.48215	0.497849	0.131232	0.439268
Camk2g	NM_001039138	CAMK2G	NA	0.26677	0.119861	0.453621
Camk2g	NM_178597	CAMK2G	NA	0.26677	0.119861	0.453621
Camk2g	NM_001039139	CAMK2G	NA	0.26677	0.119861	0.453621
Camk4	NM_009793	CAMK4	NA	-0.0083148	NA	NA
Camkk1	NM_018883	CAMKK1	NA	0.156436	NA	NA
Camkk2	NM_001199676	CAMKK2	NA	-0.144824	-0.256931	-0.327799
Camkk2	NM_145358	CAMKK2	NA	-0.144824	-0.256931	-0.327799
Caml	NM_007596	CAMLG	NA	-0.0162936	-0.133329	-0.27196
Camsap2	NM_001347110	CAMSAP2	0.481774	NA	NA	NA
Camsap2	NM_001081360	CAMSAP2	0.481774	NA	NA	NA
Camsap2	NM_001347109	CAMSAP2	0.481774	NA	NA	NA
Camta2	NM_001190378	CAMTA2	NA	0.159768	NA	NA
Camta2	NM_178116	CAMTA2	NA	0.159768	NA	NA
Camta2	NM_001190379	CAMTA2	NA	0.159768	NA	NA
Camta2	NM_001190376	CAMTA2	NA	0.159768	NA	NA
Cand1	NM_027994	CAND1	-0.186869	-0.1148	0.136461	-0.0881506
Cant1	NM_001267591	CANT1	NA	0.070876	NA	NA
Cant1	NM_029502	CANT1	NA	0.070876	NA	NA
Cant1	NM_001267592	CANT1	NA	0.070876	NA	NA
Cant1	NM_001025618	CANT1	NA	0.070876	NA	NA
Cant1	NM_001025617	CANT1	NA	0.070876	NA	NA
Canx	NM_007597	CANX	-0.215647	0.0200834	-0.0934688	0.0499203
Canx	NM_001110500	CANX	-0.215647	0.0200834	-0.0934688	0.0499203
Canx	NM_001110499	CANX	-0.215647	0.0200834	-0.0934688	0.0499203
Cap1	NM_007598	CAP1	-0.0818445	0.952831	0.0181872	-2.37385
Cap1	NM_001301067	CAP1	-0.0818445	0.952831	0.0181872	-2.37385
Capg	NM_001271395	CAPG	0.319721	0.229231	-0.0532911	0.950154
Capg	NM_001042534	CAPG	0.319721	0.229231	-0.0532911	0.950154
Capg	NM_001271415	CAPG	0.319721	0.229231	-0.0532911	0.950154
Capg	NM_007599	CAPG	0.319721	0.229231	-0.0532911	0.950154
Capn1	NM_001110504	CAPN1	-0.53321	0.287956	-0.400575	NA
Capn1	NM_007600	CAPN1	-0.53321	0.287956	-0.400575	NA
Capn10	NM_011796	CAPN10	NA	-0.112033	0.162381	NA
Capn15	NM_001347334	CAPN15	-0.174741	NA	NA	NA
Capn15	NM_015830	CAPN15	-0.174741	NA	NA	NA
Capn2	NM_009794	CAPN2	-0.13358	0.483291	-0.328658	0.275288
Capn7	NM_009796	CAPN7	-0.240258	0.0467366	0.0401748	0.0369264
Capns1	NM_009795	CAPNS1	-0.185895	0.233808	0.0548226	0.774635
Caprin1	NM_001111291	CAPRIN1	-0.0202876	-0.230942	-0.0318143	-0.0385916
Caprin1	NM_001111289	CAPRIN1	-0.0202876	-0.230942	-0.0318143	-0.0385916
Caprin1	NM_001111290	CAPRIN1	-0.0202876	-0.230942	-0.0318143	-0.0385916
Caprin1	NM_016739	CAPRIN1	-0.0202876	-0.230942	-0.0318143	-0.0385916
Caprin1	NM_001111292	CAPRIN1	-0.0202876	-0.230942	-0.0318143	-0.0385916
Caprin2	NM_001301351	CAPRIN2	NA	0.523425	NA	0.0660554
Caprin2	NM_181541	CAPRIN2	NA	0.523425	NA	0.0660554
Capza1	NM_009797	CAPZA1	NA	0.0554739	-0.114802	0.170694
Capza2	NM_007604	CAPZA2	0.197285	0.189772	-0.0609759	0.0432501
Capzb	NM_001037761	CAPZB	-0.55543	0.0423815	-0.0241031	0.223234
Capzb	NM_001271405	CAPZB	-0.55543	0.0423815	-0.0241031	0.223234
Capzb	NM_009798	CAPZB	-0.55543	0.0423815	-0.0241031	0.223234
Car12	NM_001306148	CA12	NA	0.462091	0.34635	NA
Car12	NM_178396	CA12	NA	0.462091	0.34635	NA
Car13	NM_024495	CA13	-0.192598	0.0103108	NA	-0.136296
Car2	NM_009801	CA2	0.651044	NA	NA	1.75829
Car5b	NM_181315	CA5B	NA	0.75346	0.0351265	1.8725
Card11	NM_175362	CARD11	0.245258	NA	NA	NA
Card19	NM_026738	CARD19	0.272764	0.547549	-0.159354	NA
Carhsp1	NM_025821	CARHSP1	NA	0.731449	0.774286	1.40259
Carm1	NM_021531	CARM1	-1.04694	-0.437716	0.183588	-0.0145006
Carm1	NM_153141	CARM1	-1.04694	-0.437716	0.183588	-0.0145006
Carns1	NM_134148	CARNS1	NA	0.638742	NA	NA
Cars	NM_001252593	CARS	-0.242638	-0.144002	-0.0364552	-0.10936
Cars	NM_013742	CARS	-0.242638	-0.144002	-0.0364552	-0.10936
Casc3	NM_138660	CASC3	-0.0747103	0.0300439	0.0238173	-0.324866
Casd1	NM_145398	CASD1	NA	0.216485	-0.0834479	0.0493583
Cask	NM_001284504	CASK	NA	-0.055589	NA	0.329302
Cask	NM_009806	CASK	NA	-0.055589	NA	0.329302
Cask	NM_001284505	CASK	NA	-0.055589	NA	0.329302
Cask	NM_001284503	CASK	NA	-0.055589	NA	0.329302
Caskin2	NM_080643	CASKIN2	NA	0.323113	NA	NA
Casp1	NM_009807	CASP1	0.430046	0.00699858	0.45365	0.0606628
Casp2	NM_007610	CASP2	-0.500697	0.179742	-0.301198	0.0533101
Casp3	NM_001284409	CASP3	0.0792435	-0.191826	0.235404	0.153023
Casp3	NM_009810	CASP3	0.0792435	-0.191826	0.235404	0.153023
Casp4	NM_007609	CASP5	-0.114843	0.446733	0.561052	0.0521949
Casp6	NM_009811	CASP6	0.472437	0.698034	0.569844	0.675413
Casp7	NM_007611	CASP7	-0.345411	-0.133147	-0.110839	-0.139923
Casp8	NM_009812	CASP8	-0.314797	-0.0259964	-0.316162	0.269155
Casp8	NM_001277926	CASP8	-0.314797	-0.0259964	-0.316162	0.269155
Casp8	NM_001080126	CASP8	-0.314797	-0.0259964	-0.316162	0.269155
Casp8ap2	NM_001122978	CASP8AP2	-0.224171	-0.441878	-0.2278	-0.125138
Casp8ap2	NM_011997	CASP8AP2	-0.224171	-0.441878	-0.2278	-0.125138
Casp9	NM_001277932	CASP9	NA	-0.136888	NA	NA
Casp9	NM_015733	CASP9	NA	-0.136888	NA	NA
Cast	NM_001301157	CAST	-0.582288	0.550648	-0.253454	-0.0824043
Cast	NM_009817	CAST	-0.582288	0.550648	-0.253454	-0.0824043
Cast	NM_001301181	CAST	-0.582288	0.550648	-0.253454	-0.0824043
Cast	NM_001301156	CAST	-0.582288	0.550648	-0.253454	-0.0824043
Cast	NM_001301160	CAST	-0.582288	0.550648	-0.253454	-0.0824043
Cast	NM_001301155	CAST	-0.582288	0.550648	-0.253454	-0.0824043
Cast	NM_001301153	CAST	-0.582288	0.550648	-0.253454	-0.0824043
Cast	NM_001301158	CAST	-0.582288	0.550648	-0.253454	-0.0824043
Casz1	NM_001159344	CASZ1	-0.98188	NA	NA	NA
Casz1	NM_027195	CASZ1	-0.98188	NA	NA	NA
Cat	NM_009804	CAT	0.582896	-0.243069	-0.233322	-0.0293569
Catsper2	NM_153075	CATSPER2	NA	-0.0665878	NA	NA
Cav1	NM_001243064	CAV1	NA	NA	0.771956	0.816961
Cav1	NM_007616	CAV1	NA	NA	0.771956	0.816961
Cbfa2t2	NM_001285446	CBFA2T2	-0.0380812	0.0502803	0.333684	-0.187773
Cbfa2t2	NM_009823	CBFA2T2	-0.0380812	0.0502803	0.333684	-0.187773
Cbfa2t2	NM_172860	CBFA2T2	-0.0380812	0.0502803	0.333684	-0.187773
Cbfb	NM_001161458	CBFB	0.239397	-0.177043	0.223949	0.145387
Cbfb	NM_001161456	CBFB	0.239397	-0.177043	0.223949	0.145387
Cbfb	NM_022309	CBFB	0.239397	-0.177043	0.223949	0.145387
Cbfb	NM_001161457	CBFB	0.239397	-0.177043	0.223949	0.145387
Cbl	NM_007619	CBL	-0.0666503	-0.0558202	0.322317	-0.16807
Cblb	NM_001033238	CBLB	-0.0467153	NA	NA	NA
Cbll1	NM_001253848	CBLL1	0.283481	-0.252355	0.282804	-0.351158
Cbll1	NM_001253847	CBLL1	0.283481	-0.252355	0.282804	-0.351158
Cbll1	NM_134048	CBLL1	0.283481	-0.252355	0.282804	-0.351158
Cbr4	NM_145595	CBR4	NA	-0.053888	-0.0794718	0.122047
Cbx1	NM_007622	CBX1	-0.25062	-0.253253	NA	NA
Cbx2	NM_007623	CBX2	NA	-0.046178	NA	NA
Cbx4	NM_007625	CBX4	0.116293	-0.176264	-0.185159	-0.0204585
Cbx5	NM_001110216	CBX5	0.203682	-0.654763	0.195507	0.034889
Cbx5	NM_007626	CBX5	0.203682	-0.654763	0.195507	0.034889
Cbx5	NM_001076789	CBX5	0.203682	-0.654763	0.195507	0.034889
Cbx6	NM_028763	CBX6	NA	NA	-0.468339	0.441529
Cbx7	NM_144811	CBX7	NA	0.441552	NA	NA
Cbx8	NM_013926	CBX8	NA	0.106143	NA	NA
Cby1	NM_028634	CBY1	NA	-0.671311	0.0193118	0.802803
Cc2d1a	NM_145970	CC2D1A	-0.0623179	-0.0280799	-0.365173	NA
Cc2d1b	NM_177045	CC2D1B	-0.416989	NA	NA	NA
Ccar1	NM_026201	CCAR1	-0.163036	NA	NA	NA
Ccar2	NM_146055	CCAR2	-0.45409	-0.0428432	-0.202263	0.693274
Ccdc102a	NM_001033533	CCDC102A	NA	0.145694	NA	NA
Ccdc107	NM_001037913	CCDC107	-0.26409	-0.264799	0.0547036	0.193133
Ccdc115	NM_027159	CCDC115	NA	0.0779174	0.0097508	-0.0910872
Ccdc117	NM_134033	CCDC117	-0.363837	0.235169	NA	-0.154025
Ccdc12	NM_028312	CCDC12	NA	-0.0385493	-0.197104	0.206379
Ccdc124	NM_026964	CCDC124	-0.405308	NA	NA	NA
Ccdc127	NM_024201	CCDC127	NA	-0.305751	-0.182587	-0.0923192
Ccdc127	NM_001168659	CCDC127	NA	-0.305751	-0.182587	-0.0923192
Ccdc127	NM_001168658	CCDC127	NA	-0.305751	-0.182587	-0.0923192
Ccdc130	NM_001294281	CCDC130	NA	0.287797	NA	NA
Ccdc130	NM_026350	CCDC130	NA	0.287797	NA	NA
Ccdc136	NM_001347071	CCDC136	NA	0.227498	NA	NA
Ccdc136	NM_001347073	CCDC136	NA	0.227498	NA	NA
Ccdc136	NM_145574	CCDC136	NA	0.227498	NA	NA
Ccdc136	NM_001347072	CCDC136	NA	0.227498	NA	NA
Ccdc136	NM_001201378	CCDC136	NA	0.227498	NA	NA
Ccdc137	NM_152807	CCDC137	NA	0.155032	0.151096	-0.617163
Ccdc163	NM_026714	CCDC163	NA	-0.296321	NA	NA
Ccdc186	NM_170757	CCDC186	0.384039	NA	NA	NA
Ccdc22	NM_138603	CCDC22	-0.293799	-0.149282	0.0397233	0.0693048
Ccdc25	NM_145944	CCDC25	NA	0.203917	NA	NA
Ccdc28a	NM_144820	CCDC28A	NA	0.242398	NA	NA
Ccdc28a	NM_001346751	CCDC28A	NA	0.242398	NA	NA
Ccdc34	NM_026613	CCDC34	-0.534943	-0.278539	NA	-0.00617336
Ccdc43	NM_025918	CCDC43	NA	-0.37694	0.10464	-0.118876
Ccdc47	NM_026009	CCDC47	-0.120475	-0.167745	-0.155364	-0.386034
Ccdc50	NM_001289436	CCDC50	-0.190584	-0.69999	0.613831	0.302428
Ccdc50	NM_001025615	CCDC50	-0.190584	-0.69999	0.613831	0.302428
Ccdc50	NM_026202	CCDC50	-0.190584	-0.69999	0.613831	0.302428
Ccdc58	NM_001159421	CCDC58	NA	-0.20947	0.197553	-0.318698
Ccdc58	NM_001159422	CCDC58	NA	-0.20947	0.197553	-0.318698
Ccdc58	NM_198645	CCDC58	NA	-0.20947	0.197553	-0.318698
Ccdc59	NM_025602	CCDC59	-0.287284	-0.0838558	0.0974042	-0.651075
Ccdc6	NM_001111121	CCDC6	-0.569384	-0.0916033	0.254076	-0.286983
Ccdc66	NM_177111	CCDC66	-0.481035	NA	NA	NA
Ccdc71	NM_133744	CCDC71	NA	0.047163	0.155014	-0.506228
Ccdc71l	NM_001162903	CCDC71L	NA	1.48743	-0.310594	-0.0288909
Ccdc82	NM_025534	CCDC82	-0.331401	NA	NA	NA
Ccdc84	NM_201372	CCDC84	NA	0.271432	0.235919	0.0227189
Ccdc86	NM_023731	CCDC86	NA	-0.773772	0.367677	-0.299511
Ccdc88a	NM_176841	CCDC88A	NA	NA	NA	-1.02412
Ccdc88b	NM_001081291	CCDC88B	-0.721034	NA	NA	NA
Ccdc88c	NM_026681	CCDC88C	-0.50614	0.930337	-0.154112	-0.325875
Ccdc9	NM_001136471	CCDC9	0.0156167	0.356583	0.278437	NA
Ccdc9	NM_172297	CCDC9	0.0156167	0.356583	0.278437	NA
Ccdc90b	NM_001162918	CCDC90B	NA	0.110086	0.196004	-0.0223534
Ccdc90b	NM_025515	CCDC90B	NA	0.110086	0.196004	-0.0223534
Ccdc91	NM_025911	CCDC91	NA	-0.112062	0.513246	-0.384729
Ccdc92	NM_144819	CCDC92	NA	0.120591	NA	NA
Ccdc93	NM_001025156	CCDC93	-0.146257	0.0737438	NA	-0.148015
Ccdc93	NM_029955	CCDC93	-0.146257	0.0737438	NA	-0.148015
Ccdc97	NM_028771	CCDC97	NA	-0.0165617	-0.0423627	-0.153117
Ccl1	NM_011329	CCL1	NA	-0.982874	1.9741	0.0604018
Ccl17	NM_011332	CCL17	NA	NA	NA	-1.66811
Ccl20	NM_001159738	CCL20	NA	NA	NA	-0.557795
Ccl20	NM_016960	CCL20	NA	NA	NA	-0.557795
Ccl22	NM_009137	CCL22	-0.302121	0.502924	1.57645	-0.453883
Ccl5	NM_013653	CCL5	NA	1.27132	0.562267	2.76305
Ccm2	NM_001190344	CCM2	0.101116	0.0934915	-0.0710945	-0.00329977
Ccm2	NM_146014	CCM2	0.101116	0.0934915	-0.0710945	-0.00329977
Ccm2	NM_001190343	CCM2	0.101116	0.0934915	-0.0710945	-0.00329977
Ccm2l	NM_145536	CCM2L	NA	-0.0166129	NA	NA
Ccna2	NM_009828	CCNA2	-0.495085	-0.518666	-0.00360685	-0.0977133
Ccnb1	NM_172301	CCNB1	NA	-0.415417	-0.0460613	0.400687
Ccnb2	NM_007630	CCNB2	-0.803293	-0.562625	-0.0577268	0.176239
Ccnc	NM_001290422	CCNC	NA	-0.231241	-0.0103907	-0.245939
Ccnc	NM_001122982	CCNC	NA	-0.231241	-0.0103907	-0.245939
Ccnc	NM_001290420	CCNC	NA	-0.231241	-0.0103907	-0.245939
Ccnc	NM_016746	CCNC	NA	-0.231241	-0.0103907	-0.245939
Ccnd2	NM_009829	CCND2	-0.222226	-0.205164	0.213226	-0.139039
Ccnd3	NM_001081635	CCND3	-0.267091	-0.0215625	-0.0413509	0.793538
Ccnd3	NM_001081636	CCND3	-0.267091	-0.0215625	-0.0413509	0.793538
Ccnd3	NM_007632	CCND3	-0.267091	-0.0215625	-0.0413509	0.793538
Ccndbp1	NM_010761	CCNDBP1	-0.0694262	0.0971071	-0.123486	0.211367
Ccne1	NM_007633	CCNE1	0.0274618	-0.713281	0.322403	0.380906
Ccne2	NM_001037134	CCNE2	NA	-0.793402	0.0131929	-0.208649
Ccne2	NM_001282943	CCNE2	NA	-0.793402	0.0131929	-0.208649
Ccne2	NM_009830	CCNE2	NA	-0.793402	0.0131929	-0.208649
Ccnf	NM_007634	CCNF	-0.322535	-0.294556	0.105948	0.459365
Ccng1	NM_009831	CCNG1	-0.205919	0.0727025	-0.228899	-0.367636
Ccng2	NM_007635	CCNG2	0.126413	0.641334	-0.291992	0.650204
Ccnh	NM_023243	CCNH	0.293898	-0.485859	0.166311	-0.00583001
Ccnh	NM_001347587	CCNH	0.293898	-0.485859	0.166311	-0.00583001
Ccnh	NM_001347588	CCNH	0.293898	-0.485859	0.166311	-0.00583001
Ccni	NM_017367	CCNI	NA	0.406759	0.0567626	0.169546
Ccnj	NM_172839	CCNJ	NA	0.0581879	NA	-0.518545
Ccnk	NM_009832	CCNK	-0.289422	-0.0429401	-0.115688	-0.179967
Ccnl1	NM_019937	CCNL1	-0.0525186	0.478286	0.11408	-0.199744
Ccnl2	NM_207678	CCNL2	-0.324474	0.622259	0.0756719	-0.0255465
Ccnt1	NM_009833	CCNT1	0.0341123	NA	NA	NA
Ccnt2	NM_028399	CCNT2	0.00844696	0.119523	0.0744325	-0.00250401
Ccny	NM_026484	CCNY	0.102487	NA	NA	NA
Ccp110	NM_182995	CCP110	-0.126946	NA	NA	NA
Ccpg1	NM_001286546	CCPG1	-0.13721	0.817325	-0.474695	0.481834
Ccpg1	NM_001286544	CCPG1	-0.13721	0.817325	-0.474695	0.481834
Ccpg1	NM_001114328	CCPG1	-0.13721	0.817325	-0.474695	0.481834
Ccpg1	NM_028181	CCPG1	-0.13721	0.817325	-0.474695	0.481834
Ccpg1	NM_001286545	CCPG1	-0.13721	0.817325	-0.474695	0.481834
Ccr7	NM_007719	CCR7	0.562905	-0.196034	-0.308732	0.149294
Ccr7	NM_001301713	CCR7	0.562905	-0.196034	-0.308732	0.149294
Ccr8	NM_007720	CCR8	NA	-0.15064	NA	0.629656
Ccrl2	NM_001302376	CCRL2	0.798454	NA	NA	NA
Ccrl2	NM_017466	CCRL2	0.798454	NA	NA	NA
Ccrl2	NM_001302377	CCRL2	0.798454	NA	NA	NA
Ccs	NM_016892	CCS	NA	-0.194959	0.300155	0.583701
Ccsap	NM_028536	CCSAP	NA	-0.351222	NA	NA
Ccser2	NM_028407	CCSER2	-0.235383	0.410801	-0.127144	-0.120766
Ccser2	NM_001347502	CCSER2	-0.235383	0.410801	-0.127144	-0.120766
Ccser2	NM_027045	CCSER2	-0.235383	0.410801	-0.127144	-0.120766
Ccser2	NM_001347503	CCSER2	-0.235383	0.410801	-0.127144	-0.120766
Cct2	NM_007636	CCT2	-0.414711	-0.187522	0.0539059	0.039383
Cct4	NM_009837	CCT4	-0.111322	-0.164829	0.000301168	-0.110535
Cct5	NM_001348035	CCT5	-0.483913	-0.327779	0.113271	-0.0436323
Cct5	NM_007637	CCT5	-0.483913	-0.327779	0.113271	-0.0436323
Cct7	NM_007638	CCT7	-0.480013	-0.28612	0.0867659	0.0604497
Cct8	NM_009840	CCT8	-0.247785	-0.209869	0.018259	-0.167988
Cd151	NM_009842	CD151	NA	0.556873	NA	0.730933
Cd151	NM_001111050	CD151	NA	0.556873	NA	0.730933
Cd151	NM_001111049	CD151	NA	0.556873	NA	0.730933
Cd160	NM_018767	CD160	NA	-0.603112	NA	NA
Cd160	NM_001163497	CD160	NA	-0.603112	NA	NA
Cd160	NM_001163496	CD160	NA	-0.603112	NA	NA
Cd164	NM_016898	CD164	-0.177764	0.129597	-0.0721395	-0.226597
Cd180	NM_008533	CD180	0.00515714	NA	NA	NA
Cd19	NM_009844	CD19	0.148103	0.109324	NA	-0.630305
Cd2	NM_013486	CD2	NA	0.287798	-0.160159	0.178033
Cd200	NM_010818	CD200	0.445375	-0.122903	0.169452	0.00746633
Cd22	NM_009845	CD22	-0.282161	-0.179194	NA	NA
Cd22	NR_102722	CD22	-0.282161	-0.179194	NA	NA
Cd22	NR_102723	CD22	-0.282161	-0.179194	NA	NA
Cd22	NM_001043317	CD22	-0.282161	-0.179194	NA	NA
Cd247	NR_103716	CD247	NA	0.337935	0.0436166	0.190111
Cd247	NM_001113392	CD247	NA	0.337935	0.0436166	0.190111
Cd247	NM_001113391	CD247	NA	0.337935	0.0436166	0.190111
Cd247	NM_031162	CD247	NA	0.337935	0.0436166	0.190111
Cd247	NM_001113393	CD247	NA	0.337935	0.0436166	0.190111
Cd24a	NM_009846	CD24	NA	1.20417	-1.47073	0.193691
Cd27	NM_001042564	CD27	NA	0.261291	-0.584484	-0.324467
Cd27	NM_001033126	CD27	NA	0.261291	-0.584484	-0.324467
Cd27	NM_001286753	CD27	NA	0.261291	-0.584484	-0.324467
Cd274	NM_021893	CD274	0.541971	0.0834215	0.483411	-0.126568
Cd28	NM_007642	CD28	NA	0.59679	-0.108256	0.390573
Cd2ap	NM_009847	CD2AP	-0.000633005	-0.0481825	-0.172107	-0.840719
Cd2bp2	NM_001285907	CD2BP2	-0.0798217	-0.112918	-0.123003	0.0401536
Cd2bp2	NM_001285906	CD2BP2	-0.0798217	-0.112918	-0.123003	0.0401536
Cd2bp2	NM_027353	CD2BP2	-0.0798217	-0.112918	-0.123003	0.0401536
Cd2bp2	NM_001285905	CD2BP2	-0.0798217	-0.112918	-0.123003	0.0401536
Cd320	NM_019421	CD320	NA	-0.233876	-0.0512085	0.232612
Cd320	NM_001305169	CD320	NA	-0.233876	-0.0512085	0.232612
Cd36	NM_007643	CD36	0.2859	NA	NA	NA
Cd36	NM_001159557	CD36	0.2859	NA	NA	NA
Cd36	NM_001159556	CD36	0.2859	NA	NA	NA
Cd36	NM_001159555	CD36	0.2859	NA	NA	NA
Cd36	NM_001159558	CD36	0.2859	NA	NA	NA
Cd37	NM_001290802	CD37	-0.580501	0.498292	-0.206627	0.196812
Cd37	NM_001290804	CD37	-0.580501	0.498292	-0.206627	0.196812
Cd37	NM_007645	CD37	-0.580501	0.498292	-0.206627	0.196812
Cd38	NM_007646	CD38	0.140666	0.209335	NA	NA
Cd3d	NM_013487	CD3D	NA	0.186617	-0.101892	0.298635
Cd3e	NM_007648	CD3E	NA	0.343352	-0.123102	0.288954
Cd3g	NM_009850	CD3G	NA	0.0702146	0.0032263	0.276894
Cd4	NM_013488	CD4	NA	0.111705	-0.158507	0.12046
Cd40	NM_170703	CD40	-0.0374088	0.0469572	NA	-0.98911
Cd40	NM_170702	CD40	-0.0374088	0.0469572	NA	-0.98911
Cd40	NM_170704	CD40	-0.0374088	0.0469572	NA	-0.98911
Cd40	NR_027852	CD40	-0.0374088	0.0469572	NA	-0.98911
Cd40	NM_011611	CD40	-0.0374088	0.0469572	NA	-0.98911
Cd40lg	NM_011616	CD40LG	NA	NA	-0.609191	-0.780996
Cd44	NM_001177786	CD44	-0.128205	-0.505251	0.104142	-0.0494179
Cd44	NM_001039150	CD44	-0.128205	-0.505251	0.104142	-0.0494179
Cd44	NM_009851	CD44	-0.128205	-0.505251	0.104142	-0.0494179
Cd44	NM_001177787	CD44	-0.128205	-0.505251	0.104142	-0.0494179
Cd44	NM_001177785	CD44	-0.128205	-0.505251	0.104142	-0.0494179
Cd44	NM_001039151	CD44	-0.128205	-0.505251	0.104142	-0.0494179
Cd46	NR_132621	CD46	NA	0.0462735	NA	NA
Cd46	NM_010778	CD46	NA	0.0462735	NA	NA
Cd47	NM_010581	CD47	0.000361303	0.162368	-0.00270416	0.20994
Cd48	NM_007649	CD48	0.23862	-0.235337	-0.19089	-0.0689303
Cd5	NM_007650	CD5	NA	-0.0197172	0.088506	0.191947
Cd53	NM_007651	CD53	0.358198	0.355841	0.0199516	0.215162
Cd6	NM_009852	CD6	NA	0.0317766	0.113955	0.160171
Cd6	NM_001037801	CD6	NA	0.0317766	0.113955	0.160171
Cd69	NM_001033122	CD69	-0.0261484	NA	NA	NA
Cd70	NM_011617	CD70	NA	NA	0.761494	0.0676629
Cd72	NM_001110321	CD72	-0.405407	0.102675	NA	NA
Cd72	NM_001110320	CD72	-0.405407	0.102675	NA	NA
Cd72	NM_007654	CD72	-0.405407	0.102675	NA	NA
Cd72	NM_001110322	CD72	-0.405407	0.102675	NA	NA
Cd74	NM_001042605	CD74	0.0600653	-0.015494	0.397664	-0.157041
Cd74	NM_010545	CD74	0.0600653	-0.015494	0.397664	-0.157041
Cd79a	NM_007655	CD79A	-0.202692	-0.0763271	NA	NA
Cd79b	NM_008339	CD79B	-0.373559	0.24145	NA	-0.579544
Cd79b	NM_001313939	CD79B	-0.373559	0.24145	NA	-0.579544
Cd80	NM_009855	CD80	0.106439	NA	NA	NA
Cd81	NM_133655	CD81	-0.299007	0.512157	0.0369591	0.270409
Cd82	NM_001271430	CD82	-0.240158	0.205536	0.052822	0.268929
Cd82	NM_001271432	CD82	-0.240158	0.205536	0.052822	0.268929
Cd82	NM_001136055	CD82	-0.240158	0.205536	0.052822	0.268929
Cd82	NM_007656	CD82	-0.240158	0.205536	0.052822	0.268929
Cd82	NM_001271461	CD82	-0.240158	0.205536	0.052822	0.268929
Cd82	NM_001271462	CD82	-0.240158	0.205536	0.052822	0.268929
Cd82	NM_001271431	CD82	-0.240158	0.205536	0.052822	0.268929
Cd83	NM_001289915	CD83	0.224842	-0.0051822	1.13961	-0.631861
Cd83	NM_009856	CD83	0.224842	-0.0051822	1.13961	-0.631861
Cd84	NM_013489	CD84	0.103905	0.379521	-0.248015	0.20586
Cd84	NM_001252472	CD84	0.103905	0.379521	-0.248015	0.20586
Cd84	NM_001289470	CD84	0.103905	0.379521	-0.248015	0.20586
Cd86	NM_019388	CD86	0.513777	0.251952	NA	-1.97099
Cd8b1	NM_009858	CD8B	NA	0.13055	NA	NA
Cd9	NM_007657	CD9	0.0418227	-0.41294	0.422994	0.809576
Cd93	NM_010740	CD93	0.569765	NA	NA	NA
Cd96	NM_032465	CD96	NA	-0.554067	-0.237805	NA
Cd99l2	NM_001199349	CD99L2	NA	0.0200902	NA	NA
Cd99l2	NM_138309	CD99L2	NA	0.0200902	NA	NA
Cdadc1	NM_027986	CDADC1	NA	-0.00194569	NA	NA
Cdadc1	NM_001168535	CDADC1	NA	-0.00194569	NA	NA
Cdadc1	NM_001168538	CDADC1	NA	-0.00194569	NA	NA
Cdadc1	NM_001168536	CDADC1	NA	-0.00194569	NA	NA
Cdadc1	NM_001168537	CDADC1	NA	-0.00194569	NA	NA
Cdc123	NM_133837	CDC123	-0.240401	-0.541855	-0.0511184	-0.114506
Cdc16	NM_027276	CDC16	-0.369611	-0.0364513	0.129981	0.104102
Cdc20	NM_023223	CDC20	NA	-0.385785	-0.0410501	0.0894134
Cdc23	NM_178347	CDC23	0.155378	-0.286931	0.0439754	0.066216
Cdc25a	NM_007658	CDC25A	-0.24828	-0.52106	-0.0129924	-0.382026
Cdc25b	NM_001111075	CDC25B	-1.25779	0.103326	-0.370437	0.441823
Cdc25b	NM_023117	CDC25B	-1.25779	0.103326	-0.370437	0.441823
Cdc25c	NM_009860	CDC25C	NA	-0.508491	0.0136343	0.116415
Cdc26	NM_139291	CDC26	NA	-0.00910124	0.115289	-0.0391628
Cdc27	NM_001285989	CDC27	-0.23697	0.572445	-0.28898	-0.114865
Cdc27	NM_001285990	CDC27	-0.23697	0.572445	-0.28898	-0.114865
Cdc27	NM_145436	CDC27	-0.23697	0.572445	-0.28898	-0.114865
Cdc27	NM_001285988	CDC27	-0.23697	0.572445	-0.28898	-0.114865
Cdc37	NM_016742	CDC37	-0.327586	-0.0422406	-0.0472302	0.187929
Cdc37l1	NM_001302380	CDC37L1	-0.162368	0.131546	-0.0330362	-0.306027
Cdc37l1	NM_025950	CDC37L1	-0.162368	0.131546	-0.0330362	-0.306027
Cdc37l1	NM_001302443	CDC37L1	-0.162368	0.131546	-0.0330362	-0.306027
Cdc37l1	NM_001302382	CDC37L1	-0.162368	0.131546	-0.0330362	-0.306027
Cdc40	NM_027879	CDC40	-0.213632	NA	NA	NA
Cdc42	NM_001243769	CDC42	0.0223768	-0.00405432	-0.187994	0.0445068
Cdc42	NM_009861	CDC42	0.0223768	-0.00405432	-0.187994	0.0445068
Cdc42bpa	NM_001033285	CDC42BPA	NA	0.0952509	NA	NA
Cdc42bpa	NM_001346805	CDC42BPA	NA	0.0952509	NA	NA
Cdc42bpa	NM_001346804	CDC42BPA	NA	0.0952509	NA	NA
Cdc42se1	NM_172395	CDC42SE1	-0.240985	0.335921	-0.0740052	0.027719
Cdc42se1	NM_001038708	CDC42SE1	-0.240985	0.335921	-0.0740052	0.027719
Cdc42se2	NM_178626	CDC42SE2	-0.292472	0.346164	-0.0798619	-0.0438107
Cdc45	NM_001161623	CDC45	-0.347131	-1.1997	-0.0567884	0.112099
Cdc45	NM_009862	CDC45	-0.347131	-1.1997	-0.0567884	0.112099
Cdc5l	NM_152810	CDC5L	0.115908	-0.166367	0.193386	-0.0188789
Cdc6	NM_011799	CDC6	NA	-1.08589	-0.0482042	-0.126867
Cdc6	NM_001025779	CDC6	NA	-1.08589	-0.0482042	-0.126867
Cdc7	NM_009863	CDC7	-0.445658	-0.220079	0.222493	-0.0010699
Cdc7	NM_001271568	CDC7	-0.445658	-0.220079	0.222493	-0.0010699
Cdc7	NM_001271567	CDC7	-0.445658	-0.220079	0.222493	-0.0010699
Cdc7	NM_001271566	CDC7	-0.445658	-0.220079	0.222493	-0.0010699
Cdc73	NM_145991	CDC73	-0.219865	-0.114472	-0.0186127	-0.323394
Cdca2	NM_175384	CDCA2	-0.269455	NA	NA	NA
Cdca2	NM_001110162	CDCA2	-0.269455	NA	NA	NA
Cdca3	NM_013538	CDCA3	-0.83562	NA	NA	NA
Cdca4	NM_028023	CDCA4	-0.347262	NA	NA	NA
Cdca5	NM_026410	CDCA5	-0.355339	-0.653993	-0.0290984	0.0411109
Cdca7	NM_025866	CDCA7	-0.608891	-1.10205	-0.0592234	-0.160918
Cdca7l	NM_146040	CDCA7L	NA	-0.162099	-0.149089	-0.0485349
Cdca8	NM_026560	CDCA8	-0.712309	NA	NA	NA
Cdh15	NM_007662	CDH15	NA	-0.0349202	NA	NA
Cdh17	NM_019753	CDH17	NA	0.87672	NA	1.13619
Cdh2	NM_007664	CDH2	NA	NA	NA	0.671607
Cdh23	NM_023370	CDH23	NA	0.0757149	NA	NA
Cdh23	NR_045556	CDH23	NA	0.0757149	NA	NA
Cdh23	NM_001252635	CDH23	NA	0.0757149	NA	NA
Cdip1	NM_025670	CDIP1	NA	0.0342796	0.2141	0.168398
Cdipt	NM_001347656	CDIPT	0.405001	0.114864	-0.0970422	-0.0823251
[truncated: 11,611 more rows]

## Sheet: CLIP_HEK293
Genes expressed in HEK293, with presence of a AGO-PAR-CLIP cluster after miR-124 or miR-7 transfection indicated
Gene symbol	mir124.transfec.CLIP	mir7.transfec.CLIP
AAAS	FALSE	FALSE
AACS	FALSE	FALSE
AADAT	TRUE	FALSE
AAED1	FALSE	FALSE
AAGAB	FALSE	FALSE
AAK1	FALSE	FALSE
AAMDC	FALSE	FALSE
AAMP	FALSE	FALSE
AAR2	FALSE	FALSE
AARS	FALSE	FALSE
AARS2	FALSE	FALSE
AASDH	FALSE	FALSE
AASDHPPT	TRUE	FALSE
AASS	FALSE	FALSE
AATF	FALSE	FALSE
ABAT	FALSE	FALSE
ABCA11P	FALSE	FALSE
ABCA2	FALSE	FALSE
ABCA3	FALSE	FALSE
ABCA5	FALSE	FALSE
ABCA7	FALSE	FALSE
ABCB1	FALSE	FALSE
ABCB10	FALSE	FALSE
ABCB4	FALSE	FALSE
ABCB6	FALSE	FALSE
ABCB7	FALSE	FALSE
ABCB8	FALSE	FALSE
ABCC1	FALSE	FALSE
ABCC10	FALSE	FALSE
ABCC4	FALSE	FALSE
ABCC5	FALSE	FALSE
ABCD3	FALSE	FALSE
ABCD4	FALSE	FALSE
ABCE1	FALSE	FALSE
ABCF1	FALSE	FALSE
ABCF2	TRUE	FALSE
ABCF3	FALSE	FALSE
ABCG2	FALSE	FALSE
ABHD10	FALSE	FALSE
ABHD11	FALSE	FALSE
ABHD12	FALSE	FALSE
ABHD13	FALSE	FALSE
ABHD14B	FALSE	FALSE
ABHD15	FALSE	FALSE
ABHD16A	FALSE	FALSE
ABHD17A	FALSE	FALSE
ABHD17B	FALSE	FALSE
ABHD17C	FALSE	FALSE
ABHD2	TRUE	FALSE
ABHD3	FALSE	FALSE
ABHD4	FALSE	FALSE
ABHD5	TRUE	TRUE
ABHD6	FALSE	FALSE
ABHD8	TRUE	FALSE
ABI1	TRUE	TRUE
ABI2	TRUE	FALSE
ABL1	TRUE	FALSE
ABL2	TRUE	TRUE
ABLIM1	TRUE	FALSE
ABR	FALSE	FALSE
ABRACL	FALSE	FALSE
ABT1	FALSE	FALSE
ABTB2	FALSE	FALSE
ACAA1	FALSE	FALSE
ACAA2	FALSE	FALSE
ACACA	FALSE	FALSE
ACACB	FALSE	FALSE
ACAD10	FALSE	FALSE
ACAD11	FALSE	FALSE
ACAD8	FALSE	FALSE
ACAD9	FALSE	FALSE
ACADL	FALSE	FALSE
ACADM	FALSE	FALSE
ACADS	FALSE	FALSE
ACADSB	TRUE	TRUE
ACADVL	FALSE	FALSE
ACAP2	FALSE	FALSE
ACAP3	FALSE	FALSE
ACAT1	FALSE	FALSE
ACAT2	FALSE	FALSE
ACBD3	TRUE	TRUE
ACBD4	FALSE	FALSE
ACBD5	TRUE	TRUE
ACBD6	FALSE	FALSE
ACBD7	FALSE	FALSE
ACD	TRUE	FALSE
ACER3	FALSE	FALSE
ACIN1	TRUE	TRUE
ACLY	FALSE	FALSE
ACO1	FALSE	FALSE
ACO2	FALSE	FALSE
ACOT1	FALSE	FALSE
ACOT13	FALSE	FALSE
ACOT2	TRUE	FALSE
ACOT7	FALSE	FALSE
ACOT8	FALSE	FALSE
ACOT9	FALSE	FALSE
ACOX1	FALSE	FALSE
ACP1	FALSE	FALSE
ACP2	FALSE	FALSE
ACP6	FALSE	FALSE
ACSF2	FALSE	FALSE
ACSF3	FALSE	FALSE
ACSL1	FALSE	TRUE
ACSL3	TRUE	FALSE
ACSL4	TRUE	FALSE
ACSS1	FALSE	FALSE
ACSS2	FALSE	FALSE
ACTA1	FALSE	FALSE
ACTA2	FALSE	FALSE
ACTB	TRUE	FALSE
ACTG1	TRUE	TRUE
ACTG1P20	FALSE	FALSE
ACTG1P4	FALSE	FALSE
ACTL6A	TRUE	FALSE
ACTN1	FALSE	FALSE
ACTN2	FALSE	FALSE
ACTN4	FALSE	FALSE
ACTR10	TRUE	FALSE
ACTR1A	FALSE	FALSE
ACTR1B	TRUE	FALSE
ACTR2	FALSE	FALSE
ACTR3	FALSE	FALSE
ACTR3B	TRUE	FALSE
ACTR5	FALSE	FALSE
ACTR6	FALSE	FALSE
ACTR8	TRUE	FALSE
ACVR1	TRUE	FALSE
ACVR1B	TRUE	TRUE
ACVR2A	TRUE	FALSE
ACVR2B	FALSE	FALSE
ACY1	FALSE	FALSE
ACYP1	FALSE	FALSE
ACYP2	FALSE	FALSE
ADA	FALSE	FALSE
ADAL	FALSE	FALSE
ADAM10	FALSE	FALSE
ADAM11	FALSE	FALSE
ADAM12	FALSE	FALSE
ADAM15	FALSE	FALSE
ADAM17	FALSE	FALSE
ADAM19	FALSE	FALSE
ADAM1A	FALSE	FALSE
ADAM22	FALSE	FALSE
ADAM23	FALSE	FALSE
ADAM9	TRUE	FALSE
ADAMTS1	TRUE	FALSE
ADAMTS13	FALSE	FALSE
ADAMTS15	FALSE	FALSE
ADAMTS16	FALSE	FALSE
ADAMTS17	FALSE	FALSE
ADAMTS19	FALSE	FALSE
ADAMTS2	FALSE	FALSE
ADAMTS20	FALSE	FALSE
ADAMTS3	FALSE	FALSE
ADAMTS5	FALSE	FALSE
ADAMTS9	FALSE	FALSE
ADAP1	FALSE	FALSE
ADAP2	FALSE	FALSE
ADAR	TRUE	TRUE
ADARB1	FALSE	FALSE
ADAT1	FALSE	FALSE
ADAT2	FALSE	FALSE
ADCK1	FALSE	FALSE
ADCK2	FALSE	FALSE
ADCY1	FALSE	FALSE
ADCY3	FALSE	FALSE
ADCY6	FALSE	FALSE
ADCY7	FALSE	FALSE
ADCY9	TRUE	FALSE
ADD1	FALSE	FALSE
ADD2	FALSE	FALSE
ADD3	TRUE	FALSE
ADGRA2	FALSE	FALSE
ADGRA3	FALSE	FALSE
ADGRE5	FALSE	FALSE
ADGRG2	FALSE	FALSE
ADGRG6	FALSE	FALSE
ADGRL1	FALSE	FALSE
ADGRL2	FALSE	FALSE
ADGRL3	FALSE	FALSE
ADGRV1	FALSE	FALSE
ADH5	FALSE	FALSE
ADI1	FALSE	FALSE
ADIPOR1	TRUE	FALSE
ADIPOR2	TRUE	FALSE
ADK	FALSE	TRUE
ADM	TRUE	TRUE
ADNP	FALSE	FALSE
ADNP2	TRUE	FALSE
ADO	TRUE	TRUE
ADORA2A	FALSE	FALSE
ADORA2B	FALSE	FALSE
ADPGK	FALSE	FALSE
ADPRHL2	FALSE	FALSE
ADPRM	FALSE	FALSE
ADRA2C	FALSE	FALSE
ADRM1	FALSE	FALSE
ADSL	FALSE	FALSE
ADSS	TRUE	TRUE
AEBP2	TRUE	FALSE
AEN	FALSE	FALSE
AES	FALSE	FALSE
AFAP1	FALSE	FALSE
AFAP1L1	TRUE	FALSE
AFDN	FALSE	FALSE
AFF1	TRUE	FALSE
AFF2	FALSE	FALSE
AFF3	TRUE	FALSE
AFF4	TRUE	TRUE
AFG3L1P	FALSE	FALSE
AFG3L2	FALSE	FALSE
AFMID	FALSE	FALSE
AFP	FALSE	FALSE
AFTPH	TRUE	TRUE
AGA	FALSE	FALSE
AGAP1	TRUE	FALSE
AGAP3	FALSE	FALSE
AGAP6	FALSE	FALSE
AGBL5	TRUE	FALSE
AGFG1	TRUE	TRUE
AGFG2	FALSE	FALSE
AGGF1	FALSE	FALSE
AGK	FALSE	FALSE
AGL	FALSE	FALSE
AGO1	FALSE	FALSE
AGO2	FALSE	FALSE
AGO3	FALSE	FALSE
AGO4	FALSE	FALSE
AGPAT1	FALSE	FALSE
AGPAT2	FALSE	FALSE
AGPAT3	FALSE	FALSE
AGPAT4	FALSE	FALSE
AGPAT5	TRUE	FALSE
AGPS	FALSE	FALSE
AGRN	FALSE	FALSE
AGTPBP1	TRUE	FALSE
AGTRAP	FALSE	FALSE
AHCTF1	TRUE	FALSE
AHCY	FALSE	FALSE
AHCYL1	FALSE	FALSE
AHCYL2	TRUE	FALSE
AHDC1	TRUE	FALSE
AHI1	TRUE	FALSE
AHNAK	FALSE	FALSE
AHNAK2	FALSE	FALSE
AHR	TRUE	FALSE
AHRR	FALSE	FALSE
AHSA1	TRUE	FALSE
AHSA2	FALSE	FALSE
AIDA	FALSE	FALSE
AIF1L	FALSE	FALSE
AIFM1	TRUE	FALSE
AIFM2	FALSE	FALSE
AIG1	FALSE	FALSE
AIM1	FALSE	FALSE
AIMP1	FALSE	FALSE
AIMP2	FALSE	FALSE
AIP	TRUE	FALSE
AJUBA	FALSE	FALSE
AK1	FALSE	FALSE
AK2	TRUE	FALSE
AK3	FALSE	FALSE
AK4	FALSE	FALSE
AK6	FALSE	FALSE
AK9	FALSE	FALSE
AKAP1	FALSE	FALSE
AKAP10	FALSE	FALSE
AKAP11	FALSE	FALSE
AKAP12	TRUE	TRUE
AKAP13	FALSE	FALSE
AKAP17A	FALSE	FALSE
AKAP2	FALSE	FALSE
AKAP5	FALSE	FALSE
AKAP7	FALSE	FALSE
AKAP8	TRUE	FALSE
AKAP8L	FALSE	FALSE
AKAP9	FALSE	FALSE
AKIP1	FALSE	FALSE
AKIRIN1	FALSE	FALSE
AKIRIN2	TRUE	FALSE
AKNA	FALSE	FALSE
AKR1A1	FALSE	FALSE
AKR1B1	FALSE	FALSE
AKR7A2	FALSE	FALSE
AKT1	FALSE	FALSE
AKT1S1	FALSE	FALSE
AKT2	TRUE	FALSE
AKT3	TRUE	FALSE
AKTIP	FALSE	FALSE
ALAD	FALSE	FALSE
ALAS1	FALSE	FALSE
ALCAM	FALSE	FALSE
ALDH16A1	FALSE	FALSE
ALDH18A1	FALSE	FALSE
ALDH1A2	TRUE	FALSE
ALDH1A3	FALSE	FALSE
ALDH1B1	TRUE	FALSE
ALDH2	FALSE	FALSE
ALDH3A2	FALSE	FALSE
ALDH4A1	FALSE	FALSE
ALDH5A1	FALSE	FALSE
ALDH6A1	FALSE	FALSE
ALDH7A1	FALSE	FALSE
ALDH9A1	FALSE	FALSE
ALDOA	FALSE	FALSE
ALG1	FALSE	FALSE
ALG10	FALSE	FALSE
ALG10B	TRUE	FALSE
ALG11	FALSE	FALSE
ALG12	FALSE	FALSE
ALG13	FALSE	FALSE
ALG14	FALSE	FALSE
ALG2	TRUE	TRUE
ALG3	FALSE	FALSE
ALG5	FALSE	FALSE
ALG6	FALSE	FALSE
ALG8	TRUE	FALSE
ALG9	FALSE	FALSE
ALKBH1	FALSE	FALSE
ALKBH2	TRUE	FALSE
ALKBH3	TRUE	FALSE
ALKBH4	FALSE	FALSE
ALKBH5	FALSE	FALSE
ALKBH6	FALSE	FALSE
ALKBH7	FALSE	FALSE
ALKBH8	FALSE	FALSE
ALMS1	FALSE	FALSE
ALOX12P2	FALSE	FALSE
ALPK1	FALSE	FALSE
ALPP	FALSE	FALSE
ALS2	FALSE	FALSE
ALX1	FALSE	FALSE
ALX4	FALSE	FALSE
ALYREF	FALSE	FALSE
AMACR	FALSE	FALSE
AMBRA1	FALSE	FALSE
AMD1	TRUE	FALSE
AMDHD2	FALSE	FALSE
AMER1	FALSE	FALSE
AMFR	FALSE	FALSE
AMH	FALSE	FALSE
AMIGO2	FALSE	FALSE
AMIGO3	FALSE	FALSE
AMMECR1	FALSE	FALSE
AMMECR1L	TRUE	TRUE
AMN1	FALSE	FALSE
AMOT	FALSE	FALSE
AMOTL1	TRUE	FALSE
AMOTL2	FALSE	FALSE
AMPD2	FALSE	FALSE
AMPH	FALSE	FALSE
AMZ2	TRUE	FALSE
AMZ2P1	FALSE	FALSE
ANAPC1	FALSE	FALSE
ANAPC10	TRUE	FALSE
ANAPC11	FALSE	FALSE
ANAPC13	FALSE	FALSE
ANAPC15	FALSE	FALSE
ANAPC16	FALSE	FALSE
ANAPC1P1	FALSE	FALSE
ANAPC2	FALSE	FALSE
ANAPC4	FALSE	FALSE
ANAPC5	FALSE	FALSE
ANAPC7	TRUE	FALSE
ANGEL1	FALSE	FALSE
ANGEL2	TRUE	FALSE
ANK2	FALSE	FALSE
ANK3	FALSE	FALSE
ANKEF1	FALSE	FALSE
ANKFY1	FALSE	FALSE
ANKH	FALSE	FALSE
ANKHD1	TRUE	FALSE
ANKHD1-EIF4EBP3	FALSE	FALSE
ANKIB1	FALSE	FALSE
ANKLE2	TRUE	FALSE
ANKMY1	FALSE	FALSE
ANKMY2	TRUE	FALSE
ANKRA2	TRUE	TRUE
ANKRD10	FALSE	FALSE
ANKRD11	FALSE	FALSE
ANKRD12	TRUE	FALSE
ANKRD13A	FALSE	FALSE
ANKRD13B	FALSE	FALSE
ANKRD13C	FALSE	FALSE
ANKRD13D	FALSE	FALSE
ANKRD16	FALSE	FALSE
ANKRD17	FALSE	FALSE
ANKRD18A	FALSE	FALSE
ANKRD23	FALSE	FALSE
ANKRD26	FALSE	FALSE
ANKRD27	TRUE	FALSE
ANKRD28	FALSE	FALSE
ANKRD30BL	FALSE	FALSE
ANKRD33B	FALSE	FALSE
ANKRD36	FALSE	FALSE
ANKRD36B	TRUE	TRUE
ANKRD36BP2	FALSE	FALSE
ANKRD39	FALSE	FALSE
ANKRD40	FALSE	FALSE
ANKRD42	TRUE	FALSE
ANKRD44	FALSE	FALSE
ANKRD46	FALSE	FALSE
ANKRD49	TRUE	FALSE
ANKRD50	TRUE	FALSE
ANKRD52	FALSE	FALSE
ANKRD54	FALSE	FALSE
ANKRD6	TRUE	FALSE
ANKRD9	TRUE	FALSE
ANKS1A	FALSE	FALSE
ANKS3	FALSE	FALSE
ANKS6	FALSE	FALSE
ANKZF1	FALSE	FALSE
ANLN	TRUE	FALSE
ANO10	FALSE	FALSE
ANO5	FALSE	FALSE
ANO6	FALSE	FALSE
ANO8	TRUE	FALSE
ANOS1	FALSE	FALSE
ANP32A	TRUE	TRUE
ANP32AP1	FALSE	FALSE
ANP32B	FALSE	FALSE
ANP32C	FALSE	FALSE
ANP32D	FALSE	FALSE
ANP32E	FALSE	FALSE
ANTXR1	FALSE	FALSE
ANTXR2	FALSE	FALSE
ANXA1	FALSE	FALSE
ANXA11	FALSE	FALSE
ANXA2	FALSE	FALSE
ANXA2P1	FALSE	FALSE
ANXA2P2	FALSE	FALSE
ANXA2P3	FALSE	FALSE
ANXA3	FALSE	FALSE
ANXA4	FALSE	FALSE
ANXA5	TRUE	FALSE
ANXA6	FALSE	FALSE
ANXA7	FALSE	FALSE
AOC2	FALSE	FALSE
AOC3	FALSE	FALSE
AP1AR	FALSE	FALSE
AP1B1	FALSE	FALSE
AP1G1	TRUE	TRUE
AP1G2	FALSE	FALSE
AP1M1	FALSE	FALSE
AP1S1	FALSE	FALSE
AP1S2	FALSE	FALSE
AP1S3	FALSE	FALSE
AP2A1	FALSE	FALSE
AP2A2	FALSE	FALSE
AP2B1	FALSE	FALSE
AP2M1	FALSE	FALSE
AP2S1	FALSE	FALSE
AP3B1	FALSE	FALSE
AP3B2	FALSE	FALSE
AP3D1	FALSE	FALSE
AP3M1	FALSE	FALSE
AP3M2	TRUE	FALSE
AP3S1	TRUE	FALSE
AP3S2	TRUE	FALSE
AP4B1	FALSE	FALSE
AP4E1	FALSE	FALSE
AP4M1	FALSE	FALSE
AP5B1	FALSE	FALSE
AP5M1	FALSE	FALSE
AP5S1	FALSE	FALSE
AP5Z1	FALSE	FALSE
APAF1	FALSE	FALSE
APBA2	FALSE	FALSE
APBA3	FALSE	FALSE
APBB1	FALSE	FALSE
APBB2	TRUE	FALSE
APBB3	FALSE	FALSE
APC	FALSE	FALSE
APCDD1	FALSE	FALSE
APEH	FALSE	FALSE
APEX1	FALSE	FALSE
APEX2	FALSE	FALSE
APH1A	FALSE	FALSE
APH1B	FALSE	FALSE
API5	TRUE	TRUE
APIP	FALSE	FALSE
APITD1-CORT	FALSE	FALSE
APLP1	FALSE	FALSE
APLP2	TRUE	FALSE
APMAP	FALSE	FALSE
APOBEC3C	FALSE	FALSE
APOBEC3F	TRUE	FALSE
APOL2	FALSE	FALSE
APOLD1	FALSE	FALSE
APOO	FALSE	FALSE
APOOL	TRUE	FALSE
APOPT1	FALSE	FALSE
APP	TRUE	TRUE
APPBP2	FALSE	FALSE
APPL1	TRUE	TRUE
APPL2	FALSE	FALSE
APRT	FALSE	FALSE
APTX	FALSE	FALSE
AQR	FALSE	FALSE
AR	FALSE	FALSE
ARAF	TRUE	FALSE
ARAP1	FALSE	FALSE
ARAP2	TRUE	FALSE
ARAP3	FALSE	FALSE
ARC	FALSE	FALSE
ARCN1	FALSE	FALSE
AREL1	FALSE	FALSE
ARF1	FALSE	FALSE
ARF3	FALSE	FALSE
ARF4	TRUE	FALSE
ARF5	FALSE	FALSE
ARF6	TRUE	FALSE
ARFGAP1	FALSE	FALSE
ARFGAP2	FALSE	FALSE
ARFGAP3	FALSE	FALSE
ARFGEF1	FALSE	FALSE
ARFGEF2	FALSE	FALSE
ARFGEF3	FALSE	FALSE
ARFIP1	TRUE	FALSE
ARFIP2	FALSE	FALSE
ARFRP1	TRUE	FALSE
ARG2	FALSE	FALSE
ARGLU1	FALSE	FALSE
ARHGAP1	FALSE	FALSE
ARHGAP10	FALSE	FALSE
ARHGAP11A	FALSE	FALSE
ARHGAP11B	FALSE	FALSE
ARHGAP12	TRUE	FALSE
ARHGAP17	FALSE	FALSE
ARHGAP18	FALSE	FALSE
ARHGAP19	FALSE	FALSE
ARHGAP19-SLIT1	FALSE	FALSE
ARHGAP20	TRUE	FALSE
ARHGAP21	FALSE	FALSE
ARHGAP22	TRUE	FALSE
ARHGAP23	FALSE	FALSE
ARHGAP26	FALSE	FALSE
ARHGAP27P1-BPTFP1-KPNA2P3	FALSE	FALSE
ARHGAP28	FALSE	FALSE
ARHGAP29	FALSE	FALSE
ARHGAP31	FALSE	FALSE
ARHGAP32	FALSE	FALSE
ARHGAP33	FALSE	FALSE
ARHGAP35	FALSE	FALSE
ARHGAP39	FALSE	FALSE
ARHGAP42	FALSE	FALSE
ARHGAP44	FALSE	FALSE
ARHGAP5	TRUE	FALSE
ARHGAP8	FALSE	FALSE
ARHGDIA	FALSE	FALSE
ARHGDIG	FALSE	FALSE
ARHGEF1	FALSE	FALSE
ARHGEF10	FALSE	FALSE
ARHGEF10L	FALSE	FALSE
ARHGEF11	FALSE	FALSE
ARHGEF12	FALSE	FALSE
ARHGEF17	FALSE	FALSE
ARHGEF18	FALSE	FALSE
ARHGEF2	FALSE	FALSE
ARHGEF25	FALSE	FALSE
ARHGEF26	FALSE	FALSE
ARHGEF28	FALSE	FALSE
ARHGEF3	FALSE	FALSE
ARHGEF34P	FALSE	FALSE
ARHGEF37	FALSE	FALSE
ARHGEF39	FALSE	FALSE
ARHGEF4	FALSE	FALSE
ARHGEF40	FALSE	FALSE
ARHGEF5	FALSE	FALSE
ARHGEF6	FALSE	FALSE
ARHGEF7	FALSE	FALSE
ARHGEF9	FALSE	FALSE
ARID1A	FALSE	FALSE
ARID1B	FALSE	FALSE
ARID2	FALSE	FALSE
ARID3A	FALSE	FALSE
ARID3B	FALSE	FALSE
ARID4A	FALSE	FALSE
ARID4B	FALSE	FALSE
ARID5A	FALSE	FALSE
ARID5B	TRUE	TRUE
ARIH1	FALSE	FALSE
ARIH2	TRUE	FALSE
ARL1	TRUE	FALSE
ARL13B	FALSE	FALSE
ARL14EP	FALSE	FALSE
ARL15	TRUE	FALSE
ARL16	TRUE	FALSE
ARL17A	FALSE	FALSE
ARL2	FALSE	FALSE
ARL2BP	TRUE	FALSE
ARL2-SNX15	FALSE	FALSE
ARL3	TRUE	FALSE
ARL4A	FALSE	FALSE
ARL4C	TRUE	FALSE
ARL4D	FALSE	FALSE
ARL5A	FALSE	FALSE
ARL5B	TRUE	TRUE
ARL6	FALSE	FALSE
ARL6IP1	TRUE	TRUE
ARL6IP4	FALSE	FALSE
ARL6IP5	FALSE	FALSE
ARL6IP6	TRUE	FALSE
ARL8A	TRUE	TRUE
ARL8B	FALSE	FALSE
ARMC1	TRUE	FALSE
ARMC10	FALSE	FALSE
ARMC4	FALSE	FALSE
ARMC5	FALSE	FALSE
ARMC6	FALSE	FALSE
ARMC7	FALSE	FALSE
ARMC8	FALSE	FALSE
ARMC9	FALSE	FALSE
ARMCX3	TRUE	FALSE
ARMCX5	FALSE	FALSE
ARMCX5-GPRASP2	FALSE	FALSE
ARMCX6	FALSE	FALSE
ARMT1	FALSE	FALSE
ARNT	FALSE	FALSE
ARNT2	FALSE	FALSE
ARNTL2	TRUE	TRUE
ARPC1A	FALSE	FALSE
ARPC1B	FALSE	FALSE
ARPC2	TRUE	FALSE
ARPC4	FALSE	FALSE
ARPC4-TTLL3	FALSE	FALSE
ARPC5	TRUE	FALSE
ARPC5L	TRUE	FALSE
ARPIN	FALSE	FALSE
ARPP19	FALSE	FALSE
ARRB1	FALSE	FALSE
ARRB2	FALSE	FALSE
ARRDC1	FALSE	FALSE
ARRDC2	FALSE	FALSE
ARRDC3	TRUE	TRUE
ARRDC4	FALSE	FALSE
ARSA	FALSE	FALSE
ARSB	FALSE	FALSE
ARSJ	TRUE	FALSE
ARSK	FALSE	FALSE
ARV1	TRUE	FALSE
ARVCF	FALSE	FALSE
AS3MT	FALSE	FALSE
ASAH1	FALSE	FALSE
ASAP1	TRUE	FALSE
ASAP2	FALSE	FALSE
ASAP3	FALSE	FALSE
ASB1	TRUE	FALSE
ASB13	FALSE	FALSE
ASB3	TRUE	FALSE
ASB6	TRUE	TRUE
ASB7	FALSE	FALSE
ASB8	FALSE	FALSE
ASCC1	FALSE	FALSE
ASCC2	FALSE	FALSE
ASCC3	TRUE	FALSE
ASF1A	TRUE	TRUE
ASF1B	TRUE	TRUE
ASH1L	TRUE	TRUE
ASH2L	FALSE	FALSE
ASIC1	FALSE	FALSE
ASL	FALSE	FALSE
ASMTL	FALSE	FALSE
ASNA1	FALSE	FALSE
ASNS	TRUE	FALSE
ASNSD1	TRUE	FALSE
ASPH	FALSE	FALSE
ASPHD2	TRUE	FALSE
ASPM	TRUE	FALSE
ASPSCR1	FALSE	FALSE
ASRGL1	FALSE	FALSE
ASS1	FALSE	FALSE
ASTE1	TRUE	FALSE
ASTN1	FALSE	FALSE
ASXL1	TRUE	FALSE
ASXL2	TRUE	FALSE
ASXL3	FALSE	FALSE
ATAD1	TRUE	FALSE
ATAD2	TRUE	TRUE
ATAD2B	FALSE	FALSE
ATAD3A	FALSE	FALSE
ATAD3B	FALSE	FALSE
ATAD3C	FALSE	FALSE
ATAD5	FALSE	FALSE
ATAT1	FALSE	FALSE
ATE1	FALSE	FALSE
ATF1	TRUE	FALSE
ATF2	TRUE	FALSE
ATF3	FALSE	FALSE
ATF4	TRUE	FALSE
ATF5	FALSE	FALSE
ATF6	FALSE	FALSE
ATF6B	FALSE	FALSE
ATF7	FALSE	FALSE
ATF7IP	TRUE	TRUE
ATF7IP2	FALSE	FALSE
ATG10	FALSE	FALSE
ATG101	FALSE	FALSE
ATG12	TRUE	FALSE
ATG13	FALSE	FALSE
ATG14	FALSE	FALSE
ATG16L1	FALSE	FALSE
ATG2A	FALSE	FALSE
ATG2B	TRUE	TRUE
ATG3	FALSE	FALSE
ATG4A	FALSE	FALSE
ATG4B	FALSE	FALSE
ATG4C	FALSE	FALSE
ATG4D	FALSE	FALSE
ATG5	FALSE	FALSE
ATG7	FALSE	FALSE
ATG9A	TRUE	TRUE
ATIC	FALSE	FALSE
ATL1	TRUE	FALSE
ATL2	TRUE	TRUE
ATL3	FALSE	FALSE
ATM	FALSE	FALSE
ATMIN	TRUE	FALSE
ATN1	TRUE	FALSE
ATOX1	TRUE	FALSE
ATP10D	FALSE	FALSE
ATP11A	FALSE	FALSE
ATP11B	FALSE	FALSE
ATP11C	TRUE	FALSE
ATP13A1	FALSE	FALSE
ATP13A2	FALSE	FALSE
ATP13A3	FALSE	FALSE
ATP1A1	FALSE	FALSE
ATP1A3	FALSE	FALSE
ATP1B1	FALSE	FALSE
ATP1B3	FALSE	FALSE
ATP23	FALSE	FALSE
ATP2A2	FALSE	FALSE
ATP2B1	TRUE	FALSE
ATP2B1-AS1	FALSE	FALSE
ATP2B4	FALSE	FALSE
ATP2C1	FALSE	FALSE
ATP5A1	TRUE	FALSE
ATP5B	TRUE	TRUE
ATP5C1	TRUE	FALSE
ATP5D	FALSE	FALSE
ATP5E	FALSE	FALSE
ATP5EP2	FALSE	FALSE
ATP5F1	FALSE	FALSE
ATP5G1	FALSE	FALSE
ATP5G2	FALSE	FALSE
ATP5G3	TRUE	FALSE
ATP5H	FALSE	FALSE
ATP5I	FALSE	FALSE
ATP5J	FALSE	FALSE
ATP5J2	FALSE	FALSE
ATP5J2-PTCD1	FALSE	FALSE
ATP5L	FALSE	FALSE
ATP5L2	FALSE	FALSE
ATP5O	TRUE	FALSE
ATP5S	FALSE	FALSE
ATP5SL	TRUE	FALSE
ATP6AP1	FALSE	FALSE
ATP6AP2	TRUE	FALSE
ATP6V0A1	FALSE	FALSE
ATP6V0A2	FALSE	FALSE
ATP6V0B	FALSE	FALSE
ATP6V0C	FALSE	FALSE
ATP6V0D1	FALSE	FALSE
ATP6V0E1	TRUE	FALSE
ATP6V0E2	FALSE	FALSE
ATP6V0E2-AS1	FALSE	FALSE
ATP6V1A	FALSE	FALSE
ATP6V1B2	TRUE	FALSE
ATP6V1C1	TRUE	FALSE
ATP6V1D	TRUE	FALSE
ATP6V1E1	TRUE	TRUE
ATP6V1F	FALSE	FALSE
ATP6V1G1	FALSE	FALSE
ATP6V1G2-DDX39B	FALSE	FALSE
ATP6V1H	FALSE	FALSE
ATP7A	FALSE	FALSE
ATP7B	FALSE	FALSE
ATP8A1	FALSE	FALSE
ATP8B2	FALSE	FALSE
ATP8B5P	FALSE	FALSE
ATP9A	FALSE	FALSE
ATP9B	TRUE	FALSE
ATPAF1	FALSE	FALSE
ATPAF2	FALSE	FALSE
ATPIF1	FALSE	FALSE
ATR	FALSE	FALSE
ATRAID	FALSE	FALSE
ATRIP	FALSE	FALSE
ATRN	FALSE	FALSE
ATRNL1	TRUE	TRUE
ATRX	FALSE	FALSE
ATXN1	FALSE	FALSE
ATXN10	TRUE	FALSE
ATXN1L	FALSE	FALSE
ATXN2	FALSE	FALSE
ATXN2L	TRUE	FALSE
ATXN3	TRUE	FALSE
ATXN7	TRUE	FALSE
ATXN7L1	TRUE	FALSE
ATXN7L2	FALSE	FALSE
ATXN7L3	FALSE	FALSE
ATXN7L3B	FALSE	FALSE
AUH	FALSE	FALSE
AUNIP	FALSE	FALSE
AUP1	FALSE	FALSE
AURKA	FALSE	FALSE
AURKAIP1	FALSE	FALSE
AURKAPS1	FALSE	FALSE
AURKB	FALSE	FALSE
AUTS2	FALSE	FALSE
AVEN	FALSE	FALSE
AVL9	FALSE	FALSE
AVPI1	FALSE	FALSE
AXIN1	FALSE	FALSE
AXIN2	TRUE	FALSE
AZI2	FALSE	FALSE
AZIN1	FALSE	FALSE
B2M	FALSE	FALSE
B3GALNT2	TRUE	FALSE
B3GALT6	FALSE	FALSE
B3GAT1	FALSE	FALSE
B3GAT3	FALSE	FALSE
B3GLCT	FALSE	FALSE
B3GNT2	TRUE	TRUE
B3GNT5	FALSE	FALSE
B4GALNT3	FALSE	FALSE
B4GALNT4	FALSE	FALSE
B4GALT1	FALSE	FALSE
B4GALT2	FALSE	FALSE
B4GALT3	FALSE	FALSE
B4GALT4	FALSE	FALSE
B4GALT5	FALSE	FALSE
B4GALT6	TRUE	FALSE
B4GALT7	FALSE	FALSE
B4GAT1	FALSE	FALSE
B9D1	FALSE	FALSE
BABAM1	FALSE	FALSE
BACE1	FALSE	FALSE
BACE2	FALSE	FALSE
BACH1	TRUE	FALSE
BACH2	TRUE	TRUE
BAD	FALSE	FALSE
BAG1	FALSE	FALSE
BAG2	TRUE	FALSE
BAG3	TRUE	FALSE
BAG4	TRUE	TRUE
BAG5	TRUE	FALSE
BAG6	FALSE	FALSE
BAHD1	FALSE	FALSE
BAIAP2	FALSE	FALSE
BAIAP2-AS1	FALSE	FALSE
BAIAP2L1	TRUE	TRUE
BAK1	FALSE	FALSE
BAMBI	TRUE	FALSE
BANF1	FALSE	FALSE
BANP	FALSE	FALSE
BAP1	FALSE	FALSE
BARD1	TRUE	FALSE
BARX2	FALSE	FALSE
BASP1	FALSE	FALSE
BATF3	TRUE	FALSE
BAX	FALSE	FALSE
BAZ1A	TRUE	FALSE
BAZ1B	FALSE	FALSE
BAZ2A	TRUE	FALSE
BAZ2B	TRUE	FALSE
BBC3	FALSE	FALSE
BBIP1	FALSE	FALSE
BBOF1	FALSE	FALSE
BBS1	FALSE	FALSE
BBS10	TRUE	TRUE
BBS12	FALSE	FALSE
BBS2	FALSE	FALSE
BBS4	FALSE	FALSE
BBS5	FALSE	FALSE
BBS7	FALSE	FALSE
BBS9	FALSE	FALSE
BBX	FALSE	FALSE
BCAM	FALSE	FALSE
BCAP29	FALSE	FALSE
BCAP31	FALSE	FALSE
BCAR1	FALSE	FALSE
BCAR3	FALSE	FALSE
BCAS2	FALSE	FALSE
BCAS3	FALSE	FALSE
BCAS4	FALSE	FALSE
BCAT1	FALSE	FALSE
BCAT2	TRUE	FALSE
BCCIP	FALSE	FALSE
BCDIN3D	FALSE	TRUE
BCKDHA	FALSE	FALSE
BCKDHB	FALSE	FALSE
BCKDK	FALSE	FALSE
BCL10	FALSE	FALSE
BCL11A	TRUE	TRUE
BCL11B	TRUE	TRUE
BCL2	FALSE	FALSE
BCL2L1	FALSE	FALSE
BCL2L11	TRUE	TRUE
BCL2L12	FALSE	FALSE
BCL2L13	TRUE	TRUE
BCL2L2	FALSE	FALSE
BCL2L2-PABPN1	FALSE	FALSE
BCL6	FALSE	FALSE
BCL7A	FALSE	FALSE
BCL7B	FALSE	FALSE
BCL7C	FALSE	FALSE
BCL9	FALSE	FALSE
BCL9L	FALSE	FALSE
BCLAF1	FALSE	FALSE
BCOR	TRUE	TRUE
BCORL1	TRUE	FALSE
BCR	FALSE	FALSE
BCS1L	FALSE	FALSE
BDH2	FALSE	FALSE
BDP1	FALSE	FALSE
BECN1	FALSE	FALSE
BEND3	TRUE	FALSE
BEND4	FALSE	FALSE
BEND6	FALSE	FALSE
BEND7	FALSE	FALSE
BET1	FALSE	FALSE
BET1L	TRUE	FALSE
BEX1	FALSE	FALSE
BEX2	FALSE	FALSE
BEX3	FALSE	FALSE
BEX4	TRUE	FALSE
BFAR	TRUE	FALSE
BFSP1	FALSE	FALSE
BHLHB9	TRUE	FALSE
BHLHE40	FALSE	FALSE
BHLHE41	FALSE	FALSE
BICC1	FALSE	FALSE
BICD1	FALSE	FALSE
BICD2	TRUE	TRUE
BICDL1	FALSE	FALSE
BID	FALSE	FALSE
BIN3	FALSE	FALSE
BIRC2	TRUE	FALSE
BIRC5	TRUE	TRUE
BIRC6	TRUE	FALSE
BIVM	FALSE	FALSE
BIVM-ERCC5	FALSE	FALSE
BLCAP	FALSE	FALSE
BLM	FALSE	FALSE
BLMH	FALSE	FALSE
BLOC1S1	FALSE	FALSE
BLOC1S1-RDH5	FALSE	FALSE
BLOC1S2	TRUE	TRUE
BLOC1S3	FALSE	FALSE
BLOC1S4	FALSE	FALSE
BLOC1S5	FALSE	FALSE
BLOC1S5-TXNDC5	FALSE	FALSE
BLOC1S6	FALSE	FALSE
BLVRA	FALSE	FALSE
BLVRB	FALSE	FALSE
BLZF1	TRUE	FALSE
BMF	FALSE	FALSE
BMI1	TRUE	FALSE
BMP1	FALSE	FALSE
BMP2	TRUE	FALSE
BMP2K	FALSE	FALSE
BMP3	FALSE	FALSE
BMP6	FALSE	FALSE
BMP7	FALSE	FALSE
BMP8B	FALSE	FALSE
BMPR1A	FALSE	FALSE
BMPR1B	FALSE	FALSE
BMPR2	TRUE	FALSE
BMS1	FALSE	FALSE
BMS1P20	FALSE	FALSE
BMS1P4	FALSE	FALSE
BMT2	FALSE	FALSE
BNC2	FALSE	FALSE
BNIP1	FALSE	FALSE
BNIP2	TRUE	TRUE
BNIP3	FALSE	FALSE
BNIP3L	FALSE	FALSE
BOD1	FALSE	FALSE
BOD1L1	FALSE	FALSE
BOLA2	FALSE	FALSE
BOLA2B	FALSE	FALSE
BOLA3	TRUE	FALSE
BOP1	FALSE	FALSE
BORA	FALSE	FALSE
BORCS5	FALSE	FALSE
BORCS6	FALSE	FALSE
BORCS7	FALSE	FALSE
BORCS7-ASMT	FALSE	FALSE
BORCS8	FALSE	FALSE
BORCS8-MEF2B	FALSE	FALSE
BPGM	FALSE	FALSE
BPHL	FALSE	FALSE
BPNT1	FALSE	FALSE
BPTF	TRUE	FALSE
BRAF	FALSE	FALSE
BRAP	TRUE	FALSE
BRAT1	FALSE	FALSE
BRCA1	FALSE	FALSE
BRCA2	FALSE	FALSE
BRCC3	FALSE	FALSE
BRD3	TRUE	FALSE
BRD4	TRUE	FALSE
BRD7	FALSE	FALSE
BRD8	FALSE	FALSE
BRD9	FALSE	FALSE
BRE	FALSE	FALSE
BRF1	FALSE	FALSE
BRF2	FALSE	FALSE
BRI3	FALSE	FALSE
BRI3BP	FALSE	FALSE
BRIP1	FALSE	FALSE
BRIX1	FALSE	FALSE
BRK1	FALSE	FALSE
BRMS1	FALSE	FALSE
BRMS1L	FALSE	FALSE
BROX	FALSE	FALSE
BRPF1	FALSE	FALSE
BRPF3	FALSE	FALSE
BRSK1	FALSE	FALSE
BRWD1	FALSE	FALSE
BRWD3	TRUE	FALSE
BSCL2	FALSE	FALSE
BSDC1	TRUE	TRUE
BSG	FALSE	FALSE
BSN	FALSE	FALSE
BTAF1	TRUE	FALSE
BTBD1	TRUE	FALSE
BTBD10	FALSE	FALSE
BTBD11	FALSE	FALSE
BTBD2	TRUE	FALSE
BTBD3	TRUE	TRUE
BTBD6	FALSE	FALSE
BTBD7	TRUE	FALSE
BTBD9	FALSE	FALSE
BTD	FALSE	FALSE
BTF3	TRUE	FALSE
BTF3L4	FALSE	FALSE
BTF3P11	FALSE	FALSE
BTG1	TRUE	FALSE
BTG2	TRUE	FALSE
BTG3	TRUE	TRUE
BTN2A1	FALSE	FALSE
BTN2A2	FALSE	FALSE
BTN2A3P	FALSE	FALSE
BTN3A1	FALSE	FALSE
BTN3A2	FALSE	FALSE
BTNL9	FALSE	FALSE
BTRC	TRUE	FALSE
BUB1	FALSE	FALSE
BUB1B	FALSE	FALSE
BUB1B-PAK6	FALSE	FALSE
BUB3	TRUE	TRUE
BUD13	FALSE	FALSE
BUD31	FALSE	FALSE
BVES	TRUE	FALSE
BYSL	TRUE	FALSE
BZW1	FALSE	FALSE
BZW2	FALSE	FALSE
C10orf35	FALSE	FALSE
C10orf76	FALSE	FALSE
C10orf88	TRUE	TRUE
C11orf1	FALSE	FALSE
C11orf24	FALSE	FALSE
C11orf49	FALSE	FALSE
C11orf54	TRUE	FALSE
C11orf57	TRUE	FALSE
C11orf58	FALSE	FALSE
C11orf63	FALSE	FALSE
C11orf68	FALSE	FALSE
C11orf74	FALSE	FALSE
C11orf80	FALSE	FALSE
C11orf84	TRUE	TRUE
C11orf95	FALSE	FALSE
C11orf96	FALSE	FALSE
C12orf10	TRUE	FALSE
C12orf29	TRUE	FALSE
C12orf4	TRUE	FALSE
C12orf43	FALSE	FALSE
C12orf45	TRUE	FALSE
C12orf49	TRUE	TRUE
C12orf57	FALSE	FALSE
C12orf65	FALSE	FALSE
C12orf66	FALSE	FALSE
C12orf73	TRUE	FALSE
C12orf75	FALSE	FALSE
C12orf76	FALSE	FALSE
C14orf1	TRUE	FALSE
C14orf119	FALSE	FALSE
C14orf159	FALSE	FALSE
C14orf166	TRUE	TRUE
C14orf2	FALSE	FALSE
C14orf79	FALSE	FALSE
C14orf80	FALSE	FALSE
C15orf38-AP3S2	FALSE	FALSE
C15orf39	FALSE	FALSE
C15orf40	FALSE	FALSE
C15orf41	FALSE	FALSE
C15orf57	FALSE	FALSE
C15orf59	FALSE	FALSE
C15orf61	FALSE	FALSE
C16orf52	FALSE	FALSE
C16orf58	FALSE	FALSE
C16orf59	FALSE	FALSE
C16orf62	FALSE	FALSE
C16orf70	TRUE	TRUE
C16orf72	TRUE	FALSE
C16orf87	TRUE	FALSE
C17orf100	FALSE	FALSE
C17orf49	FALSE	FALSE
C17orf51	FALSE	FALSE
C17orf53	FALSE	FALSE
C17orf58	TRUE	FALSE
C17orf62	FALSE	FALSE
C17orf75	FALSE	FALSE
C17orf80	TRUE	FALSE
C18orf21	FALSE	FALSE
C18orf25	TRUE	TRUE
C18orf32	TRUE	FALSE
C18orf54	TRUE	FALSE
C18orf8	TRUE	FALSE
C19orf12	FALSE	FALSE
C19orf24	FALSE	FALSE
C19orf25	FALSE	FALSE
C19orf43	TRUE	TRUE
C19orf44	FALSE	FALSE
C19orf48	TRUE	FALSE
C19orf53	FALSE	FALSE
C19orf54	FALSE	FALSE
C19orf60	FALSE	FALSE
C19orf70	FALSE	FALSE
C1D	FALSE	FALSE
C1GALT1	FALSE	FALSE
C1GALT1C1	FALSE	FALSE
C1GALT1C1L	FALSE	FALSE
C1orf109	FALSE	FALSE
C1orf112	FALSE	FALSE
C1orf115	TRUE	FALSE
C1orf122	FALSE	FALSE
C1orf123	FALSE	FALSE
C1orf131	FALSE	FALSE
C1orf159	FALSE	FALSE
C1orf174	TRUE	FALSE
C1orf198	TRUE	FALSE
C1orf21	FALSE	FALSE
C1orf216	FALSE	FALSE
C1orf226	TRUE	FALSE
C1orf27	FALSE	FALSE
C1orf35	TRUE	FALSE
C1orf43	TRUE	FALSE
C1orf50	FALSE	FALSE
C1orf52	FALSE	FALSE
C1QBP	FALSE	FALSE
C1QTNF3-AMACR	FALSE	FALSE
C20orf194	FALSE	FALSE
C20orf24	FALSE	TRUE
C20orf27	TRUE	TRUE
C20orf96	FALSE	FALSE
C21orf2	FALSE	FALSE
C21orf33	FALSE	FALSE
C21orf58	FALSE	FALSE
C21orf59	FALSE	FALSE
C21orf91	TRUE	FALSE
C22orf29	FALSE	FALSE
C22orf39	FALSE	FALSE
C22orf46	FALSE	FALSE
C2CD2	FALSE	FALSE
C2CD2L	FALSE	FALSE
C2CD3	FALSE	FALSE
C2CD5	FALSE	FALSE
C2orf42	TRUE	TRUE
C2orf48	FALSE	FALSE
C2orf49	TRUE	FALSE
C2orf68	FALSE	FALSE
C2orf69	FALSE	FALSE
C2orf72	FALSE	FALSE
C2orf74	FALSE	FALSE
C2orf76	FALSE	FALSE
C3orf14	FALSE	FALSE
C3orf38	FALSE	FALSE
C3orf52	FALSE	FALSE
C3orf58	FALSE	FALSE
C3orf62	FALSE	FALSE
C4orf3	FALSE	FALSE
C4orf32	TRUE	TRUE
C4orf33	FALSE	FALSE
C4orf46	TRUE	FALSE
C4orf48	FALSE	FALSE
C5orf15	TRUE	FALSE
C5orf22	FALSE	FALSE
C5orf24	TRUE	FALSE
C5orf30	FALSE	FALSE
C5orf34	FALSE	FALSE
C5orf42	FALSE	FALSE
C5orf51	FALSE	FALSE
C6orf1	FALSE	FALSE
C6orf106	TRUE	FALSE
C6orf120	TRUE	TRUE
C6orf132	FALSE	FALSE
C6orf136	FALSE	FALSE
C6orf141	FALSE	FALSE
C6orf203	TRUE	TRUE
C6orf226	FALSE	FALSE
C6orf48	FALSE	FALSE
C6orf62	FALSE	FALSE
C6orf89	FALSE	FALSE
C7orf25	TRUE	FALSE
C7orf26	FALSE	FALSE
C7orf31	FALSE	FALSE
C7orf43	FALSE	FALSE
C7orf49	FALSE	FALSE
C7orf50	FALSE	FALSE
C7orf73	FALSE	FALSE
C8orf33	FALSE	FALSE
C8orf44-SGK3	FALSE	FALSE
C8orf59	TRUE	FALSE
C8orf76	FALSE	FALSE
C8orf82	FALSE	FALSE
C8orf88	FALSE	FALSE
C9orf142	FALSE	FALSE
C9orf16	FALSE	FALSE
C9orf3	FALSE	FALSE
C9orf40	FALSE	FALSE
C9orf64	TRUE	FALSE
C9orf69	TRUE	TRUE
C9orf72	FALSE	FALSE
C9orf78	TRUE	TRUE
C9orf85	FALSE	FALSE
CA11	FALSE	FALSE
CA12	FALSE	FALSE
CA2	TRUE	TRUE
CA5B	FALSE	FALSE
CA5BP1	FALSE	FALSE
CA8	FALSE	FALSE
CAAP1	FALSE	FALSE
CAB39	TRUE	FALSE
CABIN1	FALSE	FALSE
CABLES1	FALSE	FALSE
CABLES2	FALSE	FALSE
CABYR	FALSE	FALSE
CACFD1	FALSE	FALSE
CACHD1	FALSE	FALSE
CACNA1H	FALSE	FALSE
CACNA2D1	FALSE	FALSE
CACNA2D2	FALSE	FALSE
CACNA2D3	TRUE	FALSE
CACNB1	FALSE	FALSE
CACNB2	FALSE	FALSE
CACNB3	FALSE	FALSE
CACNB4	TRUE	FALSE
CACTIN	FALSE	FALSE
CACUL1	FALSE	FALSE
CACYBP	FALSE	FALSE
CAD	TRUE	TRUE
CADM1	FALSE	FALSE
CADM4	TRUE	FALSE
CADPS2	FALSE	FALSE
CALCB	FALSE	FALSE
CALCOCO1	FALSE	FALSE
CALCOCO2	FALSE	FALSE
CALD1	TRUE	FALSE
CALHM2	FALSE	FALSE
CALM1	TRUE	FALSE
CALM2	FALSE	FALSE
CALM3	FALSE	FALSE
CALML4	FALSE	FALSE
CALR	FALSE	FALSE
CALU	TRUE	TRUE
CAMK1	FALSE	FALSE
CAMK1D	FALSE	FALSE
CAMK2B	FALSE	FALSE
CAMK2D	TRUE	FALSE
CAMK2G	FALSE	FALSE
CAMK2N1	FALSE	FALSE
CAMK4	TRUE	FALSE
CAMKK1	TRUE	FALSE
CAMKK2	TRUE	FALSE
CAMKMT	FALSE	FALSE
CAMLG	TRUE	TRUE
CAMSAP1	TRUE	FALSE
CAMSAP2	FALSE	FALSE
CAMSAP3	FALSE	FALSE
CAMTA1	FALSE	FALSE
CAMTA2	FALSE	FALSE
CAND1	TRUE	FALSE
CAND2	FALSE	FALSE
CANT1	FALSE	FALSE
CANX	TRUE	TRUE
CAP1	FALSE	FALSE
CAP2	FALSE	FALSE
CAPN1	FALSE	FALSE
CAPN10	FALSE	FALSE
CAPN15	FALSE	FALSE
CAPN2	TRUE	FALSE
CAPN7	FALSE	FALSE
CAPNS1	FALSE	FALSE
CAPRIN1	FALSE	FALSE
CAPRIN2	FALSE	FALSE
CAPZA1	TRUE	FALSE
CAPZA2	TRUE	FALSE
CAPZB	FALSE	FALSE
CARD10	TRUE	FALSE
CARD8	TRUE	FALSE
CARHSP1	FALSE	FALSE
CARM1	FALSE	FALSE
CARMIL1	FALSE	FALSE
CARMIL2	FALSE	FALSE
CARNMT1	FALSE	FALSE
CARS	FALSE	FALSE
CARS2	FALSE	FALSE
CASC10	FALSE	FALSE
CASC3	FALSE	FALSE
CASC4	FALSE	FALSE
CASD1	FALSE	FALSE
CASK	TRUE	FALSE
CASKIN1	FALSE	FALSE
CASKIN2	FALSE	FALSE
CASP10	FALSE	FALSE
CASP2	TRUE	FALSE
CASP3	TRUE	FALSE
CASP6	FALSE	FALSE
CASP7	TRUE	FALSE
CASP8	FALSE	FALSE
CASP8AP2	TRUE	FALSE
CASP9	FALSE	FALSE
CAST	FALSE	FALSE
CASZ1	FALSE	FALSE
CAT	FALSE	FALSE
CAV1	TRUE	TRUE
CAV2	FALSE	FALSE
CBFA2T2	TRUE	FALSE
CBFB	TRUE	FALSE
CBL	TRUE	FALSE
CBLB	TRUE	FALSE
CBLL1	TRUE	FALSE
CBR1	TRUE	FALSE
CBR3	FALSE	FALSE
CBR4	FALSE	FALSE
CBS	FALSE	FALSE
CBWD1	FALSE	FALSE
CBWD2	FALSE	FALSE
CBWD3	FALSE	FALSE
CBWD5	FALSE	FALSE
CBWD6	FALSE	FALSE
CBX1	FALSE	FALSE
CBX2	TRUE	TRUE
CBX3	TRUE	TRUE
CBX4	TRUE	TRUE
CBX5	FALSE	FALSE
CBX6	TRUE	FALSE
CBX7	FALSE	FALSE
CBX8	FALSE	FALSE
CBY1	FALSE	TRUE
CC2D1A	FALSE	FALSE
CC2D1B	FALSE	FALSE
CC2D2A	FALSE	FALSE
CCAR1	TRUE	FALSE
CCAR2	FALSE	FALSE
CCBE1	FALSE	FALSE
CCDC102A	FALSE	FALSE
CCDC106	FALSE	FALSE
CCDC112	TRUE	FALSE
CCDC113	TRUE	FALSE
CCDC115	FALSE	FALSE
CCDC117	TRUE	TRUE
CCDC12	FALSE	FALSE
CCDC120	FALSE	FALSE
CCDC122	FALSE	FALSE
CCDC124	FALSE	FALSE
CCDC125	TRUE	TRUE
CCDC126	FALSE	FALSE
CCDC127	FALSE	FALSE
CCDC130	FALSE	FALSE
CCDC134	FALSE	FALSE
CCDC136	FALSE	FALSE
CCDC137	TRUE	TRUE
CCDC138	FALSE	FALSE
CCDC14	FALSE	FALSE
CCDC142	FALSE	FALSE
CCDC144A	FALSE	FALSE
CCDC144B	FALSE	FALSE
CCDC144CP	FALSE	FALSE
CCDC15	FALSE	FALSE
CCDC150	FALSE	FALSE
CCDC167	FALSE	FALSE
CCDC174	FALSE	FALSE
CCDC18	FALSE	FALSE
CCDC180	FALSE	FALSE
CCDC181	FALSE	FALSE
CCDC186	FALSE	FALSE
CCDC189	FALSE	FALSE
CCDC18-AS1	FALSE	FALSE
CCDC191	FALSE	FALSE
CCDC22	FALSE	FALSE
CCDC25	FALSE	FALSE
CCDC28A	FALSE	FALSE
CCDC28B	FALSE	FALSE
CCDC3	FALSE	FALSE
CCDC34	FALSE	FALSE
CCDC40	FALSE	FALSE
CCDC43	FALSE	FALSE
CCDC47	TRUE	FALSE
CCDC50	TRUE	TRUE
CCDC51	FALSE	FALSE
CCDC57	FALSE	FALSE
CCDC58	FALSE	FALSE
CCDC59	TRUE	FALSE
CCDC6	TRUE	FALSE
CCDC66	FALSE	FALSE
CCDC68	FALSE	FALSE
CCDC69	FALSE	FALSE
CCDC71	FALSE	FALSE
CCDC71L	FALSE	FALSE
CCDC74A	FALSE	FALSE
CCDC74B	FALSE	FALSE
CCDC77	TRUE	FALSE
CCDC8	FALSE	FALSE
CCDC80	FALSE	FALSE
CCDC82	TRUE	FALSE
CCDC84	FALSE	FALSE
CCDC85B	FALSE	FALSE
CCDC85C	FALSE	FALSE
CCDC86	FALSE	FALSE
CCDC88A	FALSE	FALSE
CCDC88C	FALSE	FALSE
CCDC9	FALSE	FALSE
CCDC90B	FALSE	FALSE
CCDC91	FALSE	FALSE
CCDC92	TRUE	FALSE
CCDC93	FALSE	FALSE
CCDC94	FALSE	FALSE
CCDC97	FALSE	FALSE
CCHCR1	FALSE	FALSE
CCM2	FALSE	FALSE
CCNA2	TRUE	TRUE
CCNB1	FALSE	FALSE
CCNB1IP1	FALSE	FALSE
CCNB2	FALSE	FALSE
CCNC	FALSE	FALSE
CCND1	TRUE	TRUE
CCND2	TRUE	TRUE
CCND3	FALSE	FALSE
CCNDBP1	FALSE	FALSE
CCNE1	FALSE	FALSE
CCNE2	TRUE	FALSE
CCNF	TRUE	FALSE
CCNG1	TRUE	FALSE
CCNG2	TRUE	TRUE
CCNH	TRUE	FALSE
CCNI	TRUE	FALSE
CCNJ	FALSE	FALSE
CCNK	FALSE	FALSE
CCNL1	FALSE	FALSE
CCNL2	FALSE	FALSE
CCNT1	FALSE	FALSE
CCNT2	TRUE	TRUE
CCNY	TRUE	FALSE
CCNYL1	FALSE	FALSE
CCP110	FALSE	FALSE
CCPG1	FALSE	FALSE
CCS	FALSE	FALSE
CCSAP	FALSE	FALSE
CCSER2	FALSE	FALSE
CCT2	TRUE	TRUE
CCT3	TRUE	FALSE
CCT4	TRUE	FALSE
CCT5	FALSE	FALSE
CCT6A	TRUE	FALSE
CCT6P1	FALSE	FALSE
CCT6P3	FALSE	FALSE
CCT7	TRUE	TRUE
CCT8	TRUE	FALSE
CCZ1	FALSE	FALSE
CCZ1B	FALSE	FALSE
CD109	FALSE	FALSE
CD151	TRUE	FALSE
CD164	FALSE	FALSE
CD24	FALSE	FALSE
CD276	FALSE	FALSE
CD2AP	TRUE	TRUE
CD2BP2	FALSE	FALSE
CD302	FALSE	FALSE
CD320	FALSE	FALSE
CD3EAP	FALSE	FALSE
CD44	FALSE	FALSE
CD46	FALSE	FALSE
CD47	TRUE	FALSE
CD55	TRUE	FALSE
CD58	FALSE	FALSE
CD59	TRUE	FALSE
CD63	FALSE	FALSE
CD68	FALSE	FALSE
CD81	TRUE	FALSE
CD83	FALSE	FALSE
CD9	FALSE	FALSE
CD99	FALSE	FALSE
CD99L2	FALSE	FALSE
CDADC1	FALSE	FALSE
CDAN1	FALSE	FALSE
CDC123	TRUE	TRUE
CDC14A	FALSE	FALSE
CDC14B	FALSE	FALSE
CDC16	FALSE	FALSE
CDC20	FALSE	FALSE
CDC23	TRUE	FALSE
CDC25A	FALSE	FALSE
CDC25B	TRUE	FALSE
CDC25C	FALSE	FALSE
CDC26	FALSE	FALSE
CDC27	FALSE	FALSE
CDC34	FALSE	FALSE
CDC37	FALSE	FALSE
CDC37L1	FALSE	FALSE
CDC40	TRUE	FALSE
CDC42	FALSE	FALSE
CDC42BPA	FALSE	FALSE
CDC42BPB	FALSE	FALSE
CDC42EP1	FALSE	FALSE
CDC42EP3	TRUE	FALSE
CDC42EP4	FALSE	FALSE
CDC42SE1	FALSE	FALSE
CDC42SE2	TRUE	FALSE
CDC45	FALSE	FALSE
CDC5L	TRUE	TRUE
CDC6	FALSE	FALSE
CDC7	TRUE	TRUE
CDC73	FALSE	FALSE
CDCA2	FALSE	FALSE
CDCA3	FALSE	FALSE
CDCA4	TRUE	FALSE
CDCA5	FALSE	FALSE
CDCA7	TRUE	FALSE
CDCA7L	FALSE	FALSE
CDCA8	FALSE	FALSE
CDH11	FALSE	FALSE
CDH2	FALSE	FALSE
CDH24	FALSE	FALSE
CDH7	FALSE	FALSE
CDHR1	FALSE	FALSE
CDIP1	FALSE	FALSE
CDIPT	FALSE	FALSE
CDK1	FALSE	FALSE
CDK10	FALSE	FALSE
CDK11A	FALSE	FALSE
CDK11B	FALSE	FALSE
CDK12	FALSE	FALSE
CDK13	FALSE	FALSE
CDK14	FALSE	FALSE
CDK16	FALSE	FALSE
CDK17	FALSE	FALSE
CDK18	FALSE	FALSE
CDK19	FALSE	FALSE
CDK2	TRUE	FALSE
CDK20	FALSE	FALSE
CDK2AP1	TRUE	TRUE
CDK2AP2	FALSE	FALSE
CDK3	FALSE	FALSE
CDK4	TRUE	FALSE
CDK5	FALSE	FALSE
CDK5R1	FALSE	FALSE
CDK5RAP1	FALSE	FALSE
CDK5RAP2	FALSE	FALSE
CDK5RAP3	FALSE	FALSE
CDK6	TRUE	TRUE
CDK7	FALSE	FALSE
CDK8	FALSE	FALSE
CDK9	FALSE	FALSE
CDKAL1	FALSE	FALSE
CDKL2	FALSE	FALSE
CDKL5	FALSE	FALSE
CDKN1A	TRUE	FALSE
CDKN1B	TRUE	TRUE
CDKN2A	FALSE	FALSE
CDKN2AIP	TRUE	TRUE
CDKN2AIPNL	FALSE	FALSE
CDKN2B	FALSE	FALSE
CDKN2C	FALSE	FALSE
CDKN2D	FALSE	FALSE
CDKN3	FALSE	FALSE
CDO1	FALSE	FALSE
CDON	TRUE	FALSE
CDPF1	FALSE	FALSE
CDR2	FALSE	FALSE
CDR2L	TRUE	FALSE
CDRT4	FALSE	FALSE
CDS1	TRUE	TRUE
CDS2	FALSE	FALSE
CDT1	TRUE	FALSE
CDV3	FALSE	FALSE
CDX2	FALSE	FALSE
CDYL	FALSE	FALSE
CDYL2	FALSE	FALSE
CEACAM19	FALSE	FALSE
CEBPA	TRUE	FALSE
CEBPA-AS1	FALSE	FALSE
CEBPB	TRUE	FALSE
CEBPG	FALSE	FALSE
CEBPZ	TRUE	FALSE
CECR6	FALSE	FALSE
CECR7	FALSE	FALSE
CELF1	FALSE	FALSE
CELF2	FALSE	FALSE
CELSR1	TRUE	FALSE
CELSR2	FALSE	FALSE
CELSR3	FALSE	FALSE
CENPA	TRUE	FALSE
CENPB	FALSE	FALSE
CENPBD1	FALSE	FALSE
CENPBD1P1	FALSE	FALSE
CENPC	FALSE	FALSE
CENPE	FALSE	FALSE
CENPF	FALSE	FALSE
CENPH	FALSE	FALSE
CENPI	FALSE	FALSE
CENPJ	FALSE	FALSE
CENPK	FALSE	FALSE
CENPL	TRUE	FALSE
CENPM	FALSE	FALSE
CENPN	FALSE	FALSE
CENPO	FALSE	FALSE
CENPP	FALSE	FALSE
CENPQ	TRUE	FALSE
CENPS	FALSE	FALSE
CENPT	FALSE	FALSE
CENPU	FALSE	FALSE
CENPV	FALSE	FALSE
CENPW	FALSE	FALSE
CENPX	FALSE	FALSE
CEP104	FALSE	FALSE
CEP112	FALSE	FALSE
CEP120	TRUE	TRUE
CEP126	FALSE	FALSE
CEP128	FALSE	FALSE
CEP131	FALSE	FALSE
CEP135	TRUE	TRUE
CEP152	FALSE	FALSE
CEP162	FALSE	FALSE
CEP164	FALSE	FALSE
CEP170	FALSE	FALSE
CEP170B	FALSE	FALSE
CEP170P1	FALSE	FALSE
CEP192	FALSE	FALSE
CEP250	FALSE	FALSE
CEP290	TRUE	FALSE
CEP295	FALSE	FALSE
CEP350	FALSE	FALSE
CEP41	FALSE	FALSE
CEP44	FALSE	FALSE
CEP55	TRUE	FALSE
CEP57	FALSE	FALSE
CEP57L1	FALSE	FALSE
CEP63	FALSE	FALSE
CEP68	FALSE	FALSE
CEP70	FALSE	FALSE
CEP72	FALSE	FALSE
CEP76	FALSE	FALSE
CEP78	FALSE	FALSE
CEP83	FALSE	FALSE
CEP85	FALSE	FALSE
CEP85L	FALSE	FALSE
CEP89	FALSE	FALSE
CEP95	FALSE	FALSE
CEP97	FALSE	FALSE
CEPT1	FALSE	FALSE
CERCAM	FALSE	FALSE
CERK	TRUE	FALSE
CERS1	FALSE	FALSE
CERS2	FALSE	FALSE
CERS4	FALSE	FALSE
CERS5	FALSE	FALSE
CERS6	FALSE	FALSE
CES2	FALSE	FALSE
CES3	FALSE	FALSE
CETN2	FALSE	FALSE
CETN3	FALSE	FALSE
CFAP20	FALSE	FALSE
CFAP36	FALSE	FALSE
CFAP44	FALSE	FALSE
CFAP69	FALSE	FALSE
CFAP70	FALSE	FALSE
CFAP97	FALSE	FALSE
CFDP1	FALSE	FALSE
CFL1	FALSE	FALSE
CFL2	TRUE	FALSE
CFLAR	FALSE	FALSE
CGGBP1	TRUE	FALSE
CGN	TRUE	FALSE
CGNL1	FALSE	FALSE
CGRRF1	FALSE	FALSE
CHAC1	FALSE	FALSE
CHAC2	TRUE	FALSE
CHAF1A	FALSE	FALSE
CHAF1B	FALSE	FALSE
CHAMP1	FALSE	FALSE
CHCHD1	FALSE	FALSE
CHCHD10	FALSE	FALSE
CHCHD2	FALSE	FALSE
CHCHD3	FALSE	FALSE
CHCHD4	FALSE	FALSE
CHCHD5	FALSE	FALSE
CHCHD6	FALSE	FALSE
CHCHD7	TRUE	FALSE
CHD1	TRUE	TRUE
CHD1L	FALSE	FALSE
CHD2	FALSE	FALSE
CHD3	FALSE	FALSE
CHD4	TRUE	TRUE
CHD6	FALSE	FALSE
CHD7	TRUE	FALSE
CHD8	FALSE	FALSE
CHD9	FALSE	FALSE
CHDH	FALSE	FALSE
CHEK1	TRUE	FALSE
CHEK2	FALSE	FALSE
CHERP	TRUE	FALSE
CHFR	FALSE	FALSE
CHIC1	TRUE	FALSE
CHIC2	FALSE	FALSE
CHID1	FALSE	FALSE
CHKA	FALSE	FALSE
CHKB	FALSE	FALSE
CHKB-CPT1B	FALSE	FALSE
CHM	FALSE	FALSE
CHML	FALSE	FALSE
CHMP1A	FALSE	FALSE
CHMP1B	FALSE	FALSE
CHMP2A	FALSE	FALSE
CHMP2B	FALSE	FALSE
CHMP3	FALSE	FALSE
CHMP4A	FALSE	FALSE
CHMP4B	TRUE	TRUE
CHMP4C	TRUE	FALSE
CHMP5	FALSE	FALSE
CHMP6	FALSE	FALSE
CHMP7	TRUE	FALSE
CHN1	TRUE	FALSE
CHN2	FALSE	FALSE
CHORDC1	TRUE	FALSE
CHP1	FALSE	FALSE
CHPF	FALSE	FALSE
CHPF2	FALSE	FALSE
CHPT1	FALSE	FALSE
CHRAC1	TRUE	FALSE
CHRNA5	FALSE	FALSE
CHRNA7	FALSE	FALSE
CHST10	TRUE	FALSE
CHST11	FALSE	FALSE
CHST12	FALSE	FALSE
CHST14	FALSE	FALSE
CHST15	FALSE	FALSE
CHST3	TRUE	TRUE
CHST7	FALSE	FALSE
CHSY1	TRUE	FALSE
CHSY3	FALSE	FALSE
CHTF18	FALSE	FALSE
CHTF8	FALSE	FALSE
CHTOP	FALSE	FALSE
CHUK	TRUE	FALSE
CHURC1	FALSE	FALSE
CHURC1-FNTB	FALSE	FALSE
CIAO1	FALSE	FALSE
CIAPIN1	FALSE	FALSE
CIB1	FALSE	FALSE
CIB2	FALSE	FALSE
CIC	FALSE	FALSE
CIDECP	FALSE	FALSE
CINP	FALSE	FALSE
CIPC	FALSE	FALSE
CIR1	FALSE	FALSE
CIRBP	FALSE	FALSE
CISD1	TRUE	FALSE
CISD2	FALSE	FALSE
CISD3	FALSE	FALSE
CIT	FALSE	FALSE
CITED2	TRUE	FALSE
CIZ1	FALSE	FALSE
CKAP2	FALSE	FALSE
CKAP2L	FALSE	FALSE
CKAP4	TRUE	TRUE
CKAP5	FALSE	FALSE
CKB	TRUE	FALSE
CKLF	FALSE	FALSE
CKMT1A	FALSE	FALSE
CKMT1B	FALSE	FALSE
CKMT2-AS1	FALSE	FALSE
CKS1B	TRUE	FALSE
CKS2	TRUE	FALSE
CLASP1	FALSE	FALSE
CLASP2	FALSE	FALSE
CLASRP	FALSE	FALSE
CLCC1	FALSE	FALSE
CLCN3	TRUE	FALSE
CLCN4	FALSE	FALSE
CLCN5	FALSE	FALSE
CLCN6	FALSE	FALSE
CLCN7	FALSE	FALSE
CLDN1	FALSE	FALSE
CLDN12	FALSE	FALSE
CLDN15	FALSE	TRUE
CLDND1	FALSE	FALSE
CLEC11A	FALSE	FALSE
CLEC16A	FALSE	FALSE
CLEC2D	FALSE	FALSE
CLGN	FALSE	FALSE
CLHC1	FALSE	FALSE
CLIC4	FALSE	FALSE
CLINT1	TRUE	FALSE
CLIP1	FALSE	FALSE
CLIP2	FALSE	FALSE
CLIP4	TRUE	TRUE
CLK1	FALSE	FALSE
CLK2	TRUE	FALSE
CLK2P1	FALSE	FALSE
CLK3	FALSE	FALSE
CLK4	FALSE	FALSE
CLMN	FALSE	FALSE
CLN3	FALSE	FALSE
CLN5	FALSE	FALSE
CLN6	FALSE	FALSE
CLN8	TRUE	FALSE
CLNS1A	FALSE	FALSE
CLOCK	TRUE	FALSE
CLP1	FALSE	FALSE
CLPB	FALSE	FALSE
CLPP	FALSE	FALSE
CLPTM1	FALSE	FALSE
CLPTM1L	FALSE	FALSE
CLPX	FALSE	FALSE
CLSPN	FALSE	FALSE
CLSTN1	TRUE	FALSE
CLSTN3	FALSE	FALSE
CLTA	FALSE	FALSE
CLTB	FALSE	FALSE
CLTC	TRUE	TRUE
CLTCL1	FALSE	FALSE
CLU	FALSE	FALSE
CLUAP1	FALSE	FALSE
CLUH	FALSE	FALSE
CLUHP3	FALSE	FALSE
CMAS	TRUE	FALSE
CMBL	FALSE	FALSE
CMC1	FALSE	FALSE
CMC2	FALSE	FALSE
CMC4	FALSE	FALSE
CMIP	FALSE	FALSE
CMPK1	FALSE	FALSE
CMSS1	FALSE	FALSE
CMTM3	TRUE	FALSE
CMTM4	TRUE	FALSE
CMTM6	TRUE	TRUE
CMTM7	FALSE	FALSE
CMTM8	FALSE	FALSE
CMTR1	FALSE	FALSE
CMTR2	FALSE	FALSE
CNBP	TRUE	FALSE
CNDP2	FALSE	FALSE
CNEP1R1	FALSE	FALSE
CNIH1	FALSE	FALSE
CNIH3	FALSE	FALSE
CNIH4	TRUE	FALSE
CNKSR2	FALSE	FALSE
CNKSR3	FALSE	FALSE
CNN2	FALSE	FALSE
CNN3	FALSE	FALSE
CNNM1	FALSE	FALSE
CNNM2	FALSE	FALSE
CNNM3	FALSE	FALSE
CNNM4	FALSE	FALSE
CNOT1	TRUE	FALSE
CNOT10	FALSE	FALSE
CNOT11	FALSE	FALSE
CNOT2	TRUE	FALSE
CNOT3	FALSE	FALSE
CNOT4	FALSE	FALSE
CNOT6L	FALSE	FALSE
CNOT7	TRUE	FALSE
CNOT8	TRUE	FALSE
CNOT9	FALSE	FALSE
CNP	FALSE	FALSE
CNPPD1	FALSE	FALSE
CNPY2	FALSE	FALSE
CNPY3	TRUE	FALSE
CNPY4	FALSE	FALSE
CNRIP1	FALSE	FALSE
CNST	FALSE	FALSE
CNTLN	FALSE	FALSE
CNTN1	FALSE	FALSE
CNTN4	FALSE	FALSE
CNTNAP1	FALSE	FALSE
CNTNAP2	TRUE	TRUE
CNTNAP3B	FALSE	FALSE
CNTRL	FALSE	FALSE
CNTROB	FALSE	FALSE
COA1	FALSE	FALSE
COA3	FALSE	FALSE
COA4	FALSE	FALSE
COA5	FALSE	FALSE
COA6	FALSE	FALSE
COA7	FALSE	FALSE
COASY	FALSE	FALSE
COBL	FALSE	FALSE
COBLL1	FALSE	FALSE
COCH	FALSE	FALSE
COG1	FALSE	FALSE
COG2	FALSE	FALSE
COG3	FALSE	FALSE
COG4	FALSE	FALSE
COG5	FALSE	FALSE
COG6	FALSE	FALSE
COG7	FALSE	FALSE
COG8	TRUE	FALSE
COIL	FALSE	FALSE
COL12A1	FALSE	FALSE
COL14A1	FALSE	FALSE
COL18A1	FALSE	FALSE
COL1A1	FALSE	FALSE
COL21A1	FALSE	FALSE
COL27A1	FALSE	FALSE
COL2A1	FALSE	FALSE
COL4A1	FALSE	FALSE
COL4A2	FALSE	FALSE
COL4A3	FALSE	FALSE
COL4A3BP	FALSE	FALSE
COL4A4	FALSE	FALSE
COL4A5	TRUE	FALSE
COL4A6	FALSE	FALSE
COL5A1	FALSE	FALSE
COL6A1	FALSE	FALSE
COL6A2	FALSE	FALSE
COLEC12	TRUE	TRUE
COLGALT1	FALSE	FALSE
COLGALT2	FALSE	FALSE
COMMD1	FALSE	FALSE
COMMD10	FALSE	FALSE
COMMD2	FALSE	FALSE
COMMD3	FALSE	FALSE
COMMD3-BMI1	FALSE	FALSE
COMMD4	FALSE	FALSE
COMMD5	FALSE	FALSE
COMMD6	TRUE	FALSE
COMMD7	FALSE	FALSE
COMMD8	FALSE	FALSE
COMMD9	FALSE	FALSE
COMT	FALSE	FALSE
COMTD1	FALSE	FALSE
COPA	FALSE	FALSE
COPB1	TRUE	FALSE
COPB2	TRUE	FALSE
COPE	FALSE	FALSE
COPG1	FALSE	FALSE
COPG2	FALSE	FALSE
COPRS	FALSE	FALSE
COPS2	TRUE	FALSE
COPS3	FALSE	FALSE
COPS4	FALSE	FALSE
COPS5	FALSE	FALSE
COPS6	FALSE	FALSE
COPS7A	FALSE	TRUE
COPS7B	TRUE	TRUE
COPS8	FALSE	FALSE
COPS9	FALSE	FALSE
COPZ1	TRUE	FALSE
COQ10A	TRUE	TRUE
COQ10B	TRUE	FALSE
COQ2	TRUE	FALSE
COQ3	FALSE	FALSE
COQ4	FALSE	FALSE
COQ5	FALSE	FALSE
COQ6	FALSE	FALSE
COQ7	FALSE	FALSE
COQ8A	FALSE	FALSE
COQ8B	FALSE	FALSE
COQ9	FALSE	FALSE
CORO1B	FALSE	FALSE
CORO1C	TRUE	TRUE
CORO2A	FALSE	FALSE
CORO2B	FALSE	FALSE
CORO7	FALSE	FALSE
CORO7-PAM16	FALSE	FALSE
COTL1	FALSE	FALSE
COX10	FALSE	FALSE
COX11	FALSE	FALSE
COX14	FALSE	FALSE
COX15	FALSE	FALSE
COX16	FALSE	FALSE
COX17	FALSE	FALSE
COX18	TRUE	FALSE
COX19	FALSE	FALSE
COX20	FALSE	FALSE
COX4I1	FALSE	FALSE
COX5A	FALSE	FALSE
COX5B	TRUE	FALSE
COX6A1	FALSE	FALSE
COX6B1	FALSE	FALSE
COX6C	FALSE	FALSE
COX7A2	TRUE	FALSE
[truncated: 9,263 more rows]
